# Supplementary material for: Three-component radical homo Mannich reaction
Source: PubMed Central journal article supplement (PMC7880990; doi:10.1038/s41467-021-21303-3), 2021-02-12
Supplement: 41467_2021_21303_MOESM1_ESM.pdf [file 41467_2021_21303_MOESM1_ESM.pdf]

**Supplementary information for**  
**Three-component radical homo Mannich reaction**

Shuai Shi<sup>1</sup>, Wenting Qiu<sup>1</sup>, Pannan Miao<sup>1</sup>, Ruining Li<sup>1</sup>, Xianfeng Lin<sup>1</sup> & Zhankui Sun<sup>1\*</sup>

<sup>1</sup>Shanghai Key Laboratory for Molecular Engineering of Chiral Drugs, School of Pharmacy, Shanghai Jiao Tong University, No. 800 Dongchuan Rd., Shanghai 200240, China.

✉ email: [zksun@sjtu.edu.cn](mailto:zksun@sjtu.edu.cn)

## Contents

|                                                                   |      |
|-------------------------------------------------------------------|------|
| 1. Materials and general experimental protocols.....              | S3   |
| 2. General procedure for the synthesis of substrates .....        | S4   |
| 3. Optimization of the reaction conditions .....                  | S7   |
| 4. General procedure for the radical homo Mannich reactions ..... | S9   |
| 5. Characterization data for all key compounds .....              | S10  |
| 6. Scale-up reaction .....                                        | S48  |
| 7. Mechanistic studies .....                                      | S49  |
| 8. Spectral data .....                                            | S51  |
| 9. Supplementary References .....                                 | S139 |

## Supplementary Methods

### 1. Materials and general experimental protocols

All the reactions were run under nitrogen atmosphere in oven-dried glassware unless otherwise stated. Commercial chemicals were used as supplied without further purification. Commercial anhydrous dichloromethane employed in photoreaction were used as supplied and stored with 4 Å molecular sieves (MS). The other solvents were used directly from commercial reagents. Particle 4 Å MS were activated before use by 2-hour heating (200 °C) under high-vacuum. The radical initiator di-tert-butyl peroxide (DTBP) was used directly without further manipulation. Unless otherwise noted, all solvents in reagent grade or analytical grade were used as received.

Organic solutions were concentrated under reduced pressure on an IKA rotary evaporator using a water bath. Chromatographic purification of products was accomplished using force-flow chromatography on silica gel (200-300 mesh) according to the method of Still<sup>1</sup>. Thin-layer chromatography (TLC) was performed on 250 μm silica gel plates. TLC visualization was performed by fluorescence quenching or iodine stain. All key compounds were characterized by <sup>1</sup>H NMR, <sup>13</sup>C NMR, FT-IR and HRMS. <sup>1</sup>H NMR spectra were recorded on an Agilent NMR Systems 400 MHz Spectrometer (<sup>1</sup>H NMR at 400 MHz) and are internally referenced to residual protic CDCl<sub>3</sub> (δ 7.26 ppm). Data for <sup>1</sup>H NMR are reported as follows: chemical shift (δ ppm), multiplicity (s = singlet, d = doublet, t = triplet, q = quartet, m = multiplet, dd = doublet of doublets, dt = doublet of triplets, br = broad), coupling constant (Hz), and assignment. Infrared spectra (FT-IR) were recorded by Thermo Scientific™ Nicolet iS5 Fourier transform Spectrometer equipped with ATR and analyzed as thin films. Absorption maxima (ν<sub>max</sub>) were reported in wavenumbers (cm<sup>-1</sup>) and characteristic peaks were defined (s = strong, br = broad). <sup>13</sup>C NMR spectra were recorded on an Agilent NMR Systems 400 MHz Spectrometer (<sup>13</sup>C NMR at 101 MHz) and data are reported in terms of chemical shift relative to CDCl<sub>3</sub> (77.16 ppm). <sup>19</sup>F NMR spectra were recorded on an Agilent NMR Systems 400 MHz Spectrometer (<sup>19</sup>F NMR at 376 MHz). HRMS: electrospray ionization mass (ESI-MS) was performed on Agilent 6210 Series TOF MS. GC-MS analyses were performed on a GC-MS with an EI mode. LC-MS spectra were acquired by Acquity™ UPLC/Xevo-G2-XS-QTOF-MS using C18 column (150mm×2.1mm, 1.7μm). HPLC: analytical reversed-phase HPLC was performed on Agilent (1200 series HPLC system) instrument employing an analytical C18 column (250 × 4.6 mm, 5 μm). Mobile phases of HPLC are as followed: solvent A: 0.1% TFA (v/v) in acetonitrile; Solvent B: 0.1% TFA (v/v) in water. The 40W household bulb were directly purchased from supermarket.

## 2. General procedure for the synthesis of substrates

### General protocol A for the synthesis of thiols

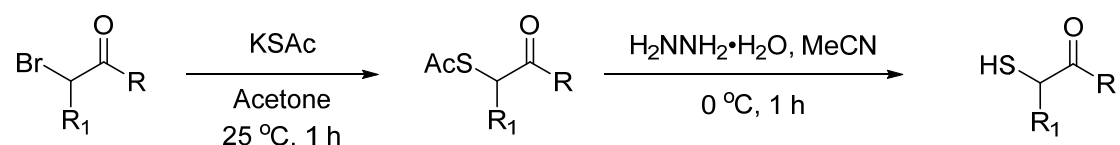

**Supplementary Fig. 1** Preparation of thiols from commercial compounds in two steps.<sup>2</sup>

General procedure A for the preparation of thiols:

To a round bottomed flask with starting material (8.73 mmol) in acetone (87 mL) was added potassium thioacetate (1.1 equiv, 1.10 g, 9.60 mmol). The resulting mixture was stirred at room temperature for 1 hour. The mixture was filtered and the solvent was removed *in vacuo*. The resulting residue was distributed between water (100 mL) and DCM (300 mL). The organic layer was washed with brine (150 mL), dried with Na<sub>2</sub>SO<sub>4</sub>, concentrated and purified to provide the desired thioester.

To the round bottomed flask with thioester (5 mmol) in acetonitrile (60 mL) was added 35% aqueous solution of hydrazine hydrate (1.5 equiv, 0.7 mL, 7.5 mmol) by syringe under N<sub>2</sub>. The reaction mixture was stirred 1 hour before it was quenched with HCl (10 mL, 1 M). The reaction mixture was extracted with DCM (50 mL×3). The combined organic layer was washed with HCl (50 mL, 1 M) and brine (80 mL), dried over Na<sub>2</sub>SO<sub>4</sub>, concentrated and purified by flash chromatography (10% ethyl acetate/hexanes) to give the desired thiol.

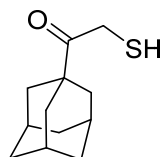

**1-((3r,5r,7r)-adamantan-1-yl)-2-mercaptoethan-1-one (a)** was prepared from 1-((3r,5r,7r)-adamantan-1-yl)-2-bromoethan-1-one according to the general procedures as a white solid (0.63 g, 60% yield). <sup>1</sup>H NMR (400 MHz, CDCl<sub>3</sub>) δ 3.51 (d, *J* = 6.7 Hz, 2H), 2.08 - 1.92 (m, 4H), 1.81 (d, *J* = 2.8 Hz, 6H), 1.74 - 1.63 (m, 6H). <sup>13</sup>C NMR (101 MHz, CDCl<sub>3</sub>) δ 209.4, 46.7, 38.6, 36.5, 29.8, 28.0. HRMS (ESI) calcd for C<sub>12</sub>H<sub>19</sub>OS [M + H]<sup>+</sup> *m/z* = 211.1151, found: 211.1153. The NMR spectra matches that of previously reported literature.<sup>2</sup>

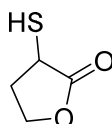

**3-mercaptodihydrofuran-2(3H)-one (b)** was prepared from 3-bromodihydrofuran-2(3H)-one using the general procedures as colorless oil (0.38 g, 65% yield). <sup>1</sup>H NMR (400 MHz, CDCl<sub>3</sub>) δ 4.39 (ddd, *J* = 9.1, 7.6, 5.9 Hz, 1H), 4.26 (ddd, *J* = 9.1, 7.3, 6.5 Hz, 1H), 3.67 (ddd, *J* = 8.4, 6.9, 5.1 Hz, 1H), 2.73 - 2.53 (m, 1H), 2.28 (d, *J* = 5.1 Hz, 1H), 2.12 (ddt, *J* = 13.4, 7.5, 6.7 Hz, 1H). <sup>13</sup>C NMR (101 MHz, CDCl<sub>3</sub>) δ 176.6, 66.5, 34.7, 31.9. HRMS (ESI) calcd for C<sub>4</sub>H<sub>7</sub>O<sub>2</sub>S [M + H]<sup>+</sup>

$m/z = 119.0161$ , found: 119.0161. The NMR spectra matches that of previously reported literature.

3

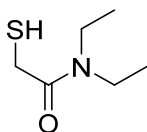

***N,N*-diethyl-2-mercaptoacetamide (c)** was prepared from 2-chloro-*N,N*-diethylacetamide according to the general procedures as colorless oil (0.55 g, 75% yield).  $^1\text{H}$  NMR (400 MHz,  $\text{CDCl}_3$ )  $\delta$  3.43 - 3.15 (m, 6H), 2.12 (t,  $J = 7.5$  Hz, 1H), 1.17 (t,  $J = 7.2$  Hz, 3H), 1.08 (t,  $J = 7.1$  Hz, 3H).  $^{13}\text{C}$  NMR (101 MHz,  $\text{CDCl}_3$ )  $\delta$  169.1, 42.7, 40.8, 26.3, 14.5, 12.9. HRMS (ESI) calcd for  $\text{C}_6\text{H}_{14}\text{NOS}$   $[\text{M} + \text{H}]^+$   $m/z = 148.0791$ , found: 148.0795. The NMR spectra matches that of previously reported literature.<sup>2</sup>

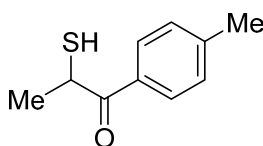

**2-mercapto-1-(p-tolyl) propan-1-one (d)** was prepared from 2-bromo-1-(p-tolyl) propan-1-one using the general procedures as yellow oil (0.54 g, 60% yield).  $^1\text{H}$  NMR (400 MHz,  $\text{CDCl}_3$ )  $\delta$  7.84 (d,  $J = 8.2$  Hz, 2H), 7.23 (d,  $J = 8.3$  Hz, 2H), 4.34 (dq,  $J = 9.5, 6.8$  Hz, 1H), 2.37 (s, 3H), 2.00 (d,  $J = 9.5$  Hz, 1H), 1.57 (d,  $J = 6.8$  Hz, 3H).  $^{13}\text{C}$  NMR (101 MHz,  $\text{CDCl}_3$ )  $\delta$  197.4, 144.2, 132.2, 129.5, 128.8, 36.6, 21.7, 21.0. HRMS (ESI) calcd for  $\text{C}_{10}\text{H}_{13}\text{OS}$   $[\text{M} + \text{H}]^+$   $m/z = 181.0682$ , found: 181.0682.

#### General protocol B for the synthesis of thiols:

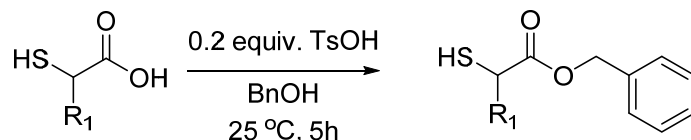

To a round bottomed flask with 5 ml BnOH and 2-mercaptoacetic acid (20 mmol) was added *p*-Toluenesulfonic acid (0.2 equiv, 0.34g, 2 mmol). The reaction mixture was stirred for 5 hours. DCM (150 mL) was added. The mixture was washed with brine (20 mL), dried over  $\text{Na}_2\text{SO}_4$ , concentrated and purified by flash chromatography to give the desired thiol.

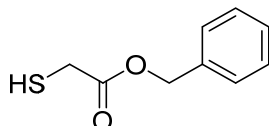

**benzyl 2-mercaptoacetate (e)** was prepared according to the general protocol B as transparent oil (2.9 g, 80% yield).  $^1\text{H}$  NMR (400 MHz,  $\text{CDCl}_3$ )  $\delta$  7.46 - 7.27 (m, 5H), 5.16 (s, 2H), 3.28 (d,  $J = 8.3$  Hz, 2H), 2.01 (t,  $J = 8.3$  Hz, 1H).  $^{13}\text{C}$  NMR (101 MHz,  $\text{CDCl}_3$ )  $\delta$  170.7, 135.4, 128.7, 128.5, 128.4, 67.4, 26.6. HRMS (ESI) calcd for  $\text{C}_9\text{H}_{11}\text{O}_2\text{S}$   $[\text{M} + \text{H}]^+$   $m/z = 183.0474$ , found: 183.0477. The NMR data matches that of reported literature.<sup>4</sup>

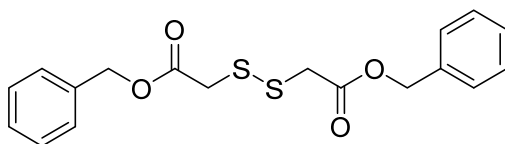

**dibenzyl 2,2'-disulfanediyl diacetate (f)** was prepared according to the general protocol B as transparent oil (5.9g, 82% yield).  $^1\text{H}$  NMR (400 MHz,  $\text{CDCl}_3$ )  $\delta$  7.45 - 7.26 (m, 10H), 5.16 (s, 4H), 3.56 (s, 4H).  $^{13}\text{C}$  NMR (101 MHz,  $\text{CDCl}_3$ )  $\delta$  169.2, 135.4, 128.7, 128.7, 128.6, 128.5, 128.43, 67.4, 41.5. HRMS (ESI) calcd for  $\text{C}_{18}\text{H}_{19}\text{O}_4\text{S}_2$   $[\text{M} + \text{H}]^+$   $m/z = 363.0719$ , found: 363.0721.

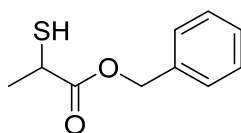

**benzyl 2-mercaptoacetate (g)** was prepared according to the general protocol B as transparent oil (3.3 g, 85% yield). HRMS (ESI) calcd for  $\text{C}_{10}\text{H}_{13}\text{O}_2\text{S}$   $[\text{M} + \text{H}]^+$   $m/z = 197.0631$ , found: 197.0632. The NMR data matches that of reported literature.<sup>5</sup>

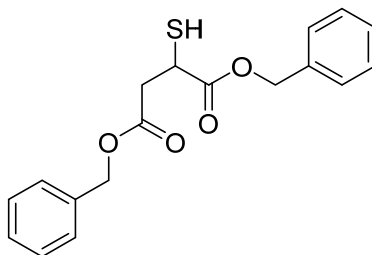

**dibenzyl 2-mercaptosuccinate (h)** was prepared according to the general protocol B as transparent oil (5.6 g, 85% yield).  $^1\text{H}$  NMR (400 MHz,  $\text{CDCl}_3$ )  $\delta$  7.43 - 7.27 (m, 10H), 5.24 - 5.03 (m, 4H), 3.83 (td,  $J = 9.2, 5.9$  Hz, 1H), 3.08 (dd,  $J = 17.0, 9.0$  Hz, 1H), 2.83 (dd,  $J = 17.0, 5.9$  Hz, 1H), 2.22 (d,  $J = 9.5$  Hz, 1H).  $^{13}\text{C}$  NMR (101 MHz,  $\text{CDCl}_3$ )  $\delta$  172.0, 170.0, 135.5, 135.4, 128.6, 128.4, 128.3, 128.2, 67.5, 66.9, 39.9, 36.3. HRMS (ESI) calcd for  $\text{C}_{18}\text{H}_{19}\text{O}_4\text{S}$   $[\text{M} + \text{H}]^+$   $m/z = 331.0999$ , found: 331.0997.

### 3. Optimization of the reaction condition

**Supplementary Table 1** | Optimization of reaction conditions <sup>a</sup>.

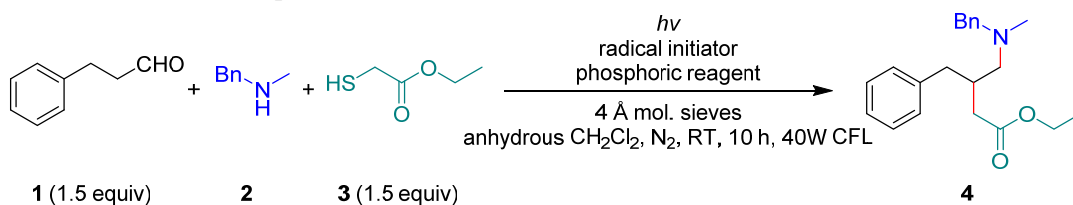

| entry | phosphoric reagent              | radical initiator                        | solvent            | Yield (%) <sup>b</sup> |
|-------|---------------------------------|------------------------------------------|--------------------|------------------------|
| 1     | 1.5 equiv. PPh <sub>3</sub>     | 2.0 equiv. DTBP                          | DCM                | 91                     |
| 2     | 2.0 equiv. PPh <sub>3</sub>     | 2.0 equiv. DTBP                          | DCM                | 91                     |
| 3     | 1.2 equiv. PPh <sub>3</sub>     | 2.0 equiv. DTBP                          | DCM                | 85                     |
| 4     | 1.5 equiv. PPh <sub>3</sub>     | 1.0 equiv. DTBP                          | DCM                | 70                     |
| 5     | 1.5 equiv. PPh <sub>3</sub>     | 1.5 equiv. DTBP                          | DCM                | 82                     |
| 6     | 1.5 equiv. PPh <sub>3</sub>     | 2.5 equiv. DTBP                          | DCM                | 91                     |
| 7     | 1.5 equiv. PPh <sub>3</sub>     | 2.0 equiv. DTBP                          | EA                 | 72                     |
| 8     | 1.5 equiv. PPh <sub>3</sub>     | 2.0 equiv. DTBP                          | CH <sub>3</sub> CN | 48                     |
| 9     | 1.5 equiv. PPh <sub>3</sub>     | 2.0 equiv. DTBP                          | DMF                | 79                     |
| 10    | 1.5 equiv. PPh <sub>3</sub>     | 2.0 equiv. DTBP                          | Toluene            | 82                     |
| 11    | 1.5 equiv. TEP                  | 2.0 equiv. DTBP                          | DCM                | 88                     |
| 12    | 1.5 equiv. Ph <sub>2</sub> POEt | 2.0 equiv. DTBP                          | DCM                | 86                     |
| 14    | 1.5 equiv. PPh <sub>3</sub>     | 2.0 equiv. H <sub>2</sub> O <sub>2</sub> | DCM                | N.D.                   |
| 15    | 1.5 equiv. PPh <sub>3</sub>     | 2.0 equiv. TBHP                          | DCM                | N.D.                   |

|                                                                   |                             |                                                  |     |      |
|-------------------------------------------------------------------|-----------------------------|--------------------------------------------------|-----|------|
| 16                                                                | 1.5 equiv. PPh <sub>3</sub> | 2.0 equiv. DCP                                   | DCM | 72   |
| 17                                                                | 1.5 equiv. PPh <sub>3</sub> | 0.05 equiv. Ru(bpy) <sub>3</sub> Cl <sub>2</sub> | DCM | <5   |
| 18                                                                | 1.5 equiv. PPh <sub>3</sub> | 0.05 equiv.                                      | DCM | 29%  |
| (Ir[dF(CF <sub>3</sub> )ppy] <sub>2</sub> (dtbpy))PF <sub>6</sub> |                             |                                                  |     |      |
| 19                                                                | 1.5 equiv. PPh <sub>3</sub> | 0.1 equiv. Eosin Y                               | DCM | <5   |
| 20                                                                | 1.5 equiv. PPh <sub>3</sub> | —                                                | DCM | N.D. |
| 21                                                                | —                           | 2.0 equiv. DTBP                                  | DCM | N.D. |
| 22 <sup>c</sup>                                                   | 1.5 equiv. PPh <sub>3</sub> | 2.0 equiv. DTBP                                  | DCM | N.D. |

<sup>a</sup>Reactions conditions: **1** (1.5 mmol), **2** (1.0 mmol), **3** (1.5 mmol), phosphoric reagent, radical initiator, 6 ml solvent, room temperature, 40 W household CFL bulb irradiation on two sides, 10 h. <sup>b</sup>Yields of isolated product. N.D. = not detected DTBP = di-tert-butyl peroxide, TBHP = t-butylhydroperoxide, DCP = Dicumyl peroxide. TEP = triethyl phosphite. <sup>c</sup>Without light.



#### 4. General procedure for the three-component radical homo Mannich reaction

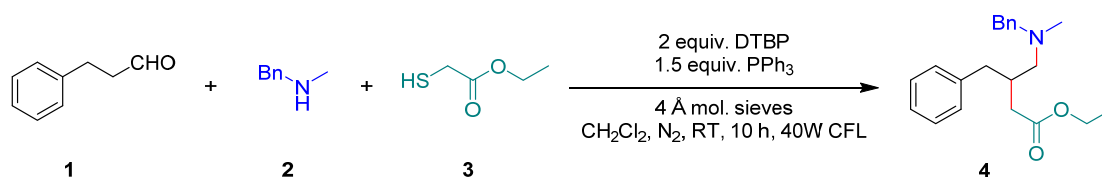

To a 10 ml oven-dried round bottomed flask were added 4 Å molecular sieves (1g) and triphenylphosphine (393 mg, 1.5 mmol). The flask was degassed three times and protected with N<sub>2</sub> before anhydrous DCM (6 ml) was added. Amine (1 mmol), aldehyde/ketone (1.5 mmol), thiol (1.5 mmol) and DTBP (292 mg, 2 mmol, 0.37ml) were added into the reaction mixture in order by micro-syringe. The reaction was stirred and irradiated using two 40 W household CFL bulbs (6 cm away, to keep the reaction at room temperature) at room temperature for 10 hours. When the reaction was complete, EtOAc was added (20 mL). The mixture was dried with sodium sulfate, filtered and concentrated. The residue was purified by column chromatography on silica to give the product.

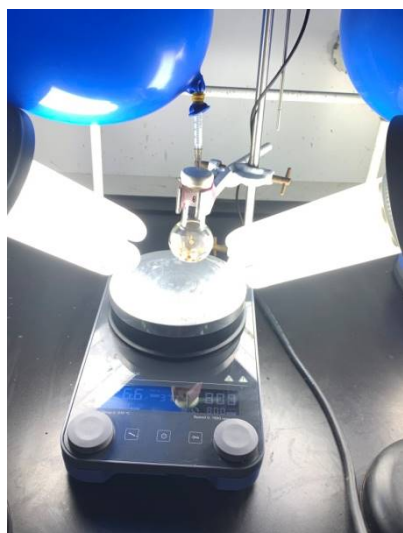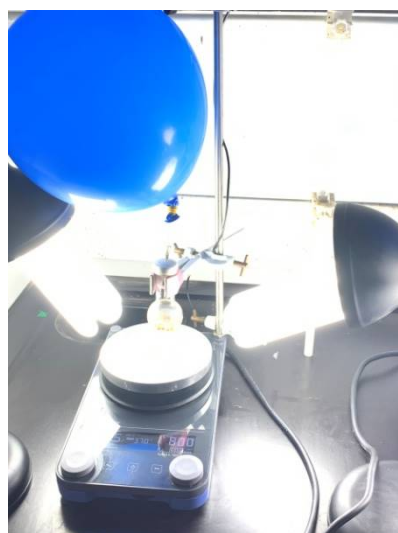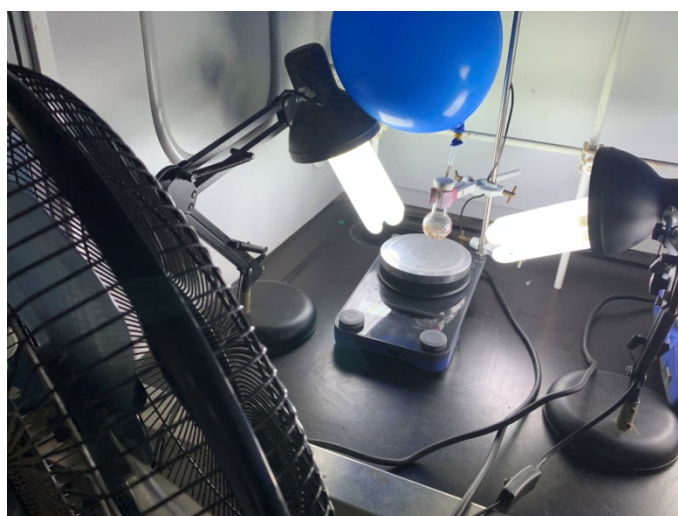

**Supplementary Fig. 2** Experimental set-up pictures using visible-light

## 5. Characterization data for all key compounds

### ethyl 3-benzyl-4-(benzyl(methyl)amino) butanoate (4)

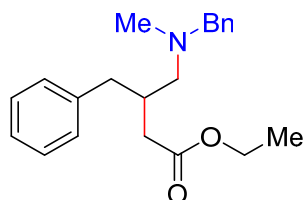

Prepared following the general procedure employing N-methyl-1-phenylmethanamine (121 mg, 1 mmol), 3-phenylpropanal (201 mg, 1.5 mmol), ethyl 2-mercaptoacetate (180 mg, 1.5 mmol), triphenylphosphine (393 mg, 1.5 mmol), 4Å MS (1 g), di-tert-butyl peroxide (292 mg, 2 mmol, 0.37 ml) in anhydrous dichloromethane (6 mL). The desired product was obtained as colorless oil (295 mg, 91% yield) after purification by flash column chromatography on silica gel (0.5% Et<sub>3</sub>N in dichloromethane).

<sup>1</sup>H NMR (400 MHz, CDCl<sub>3</sub>) δ 7.42 - 7.04 (m, 10H), 4.06 (q, *J* = 7.1 Hz, 2H), 3.46 (s, 2H), 2.76 (dd, *J* = 13.2, 5.6 Hz, 1H), 2.59 - 2.33 (m, 3H), 2.32 - 2.18 (m, 3H), 2.15 (s, 3H), 1.22 (t, *J* = 7.1 Hz, 3H). <sup>13</sup>C NMR (101 MHz, CDCl<sub>3</sub>) δ 173.4, 140.1, 139.5, 129.5, 129.1, 128.4, 128.3, 127.0, 126.1, 62.9, 61.6, 60.2, 42.6, 39.0, 37.4, 35.6, 14.4. HRMS (ESI) calcd for C<sub>21</sub>H<sub>28</sub>NO<sub>2</sub> [M + H]<sup>+</sup> *m/z* = 326.2115, found: 326.2117. IR *v*<sub>max</sub>/cm<sup>-1</sup> (film): 3026, 2928, 2789, 1731, 1494, 1453, 1372, 1250, 1153, 1077, 1025, 969, 741, 699.

### ethyl 3-benzyl-4-((4-methoxybenzyl)(methyl)amino)butanoate (5)

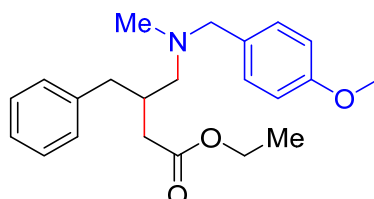

Prepared following the general procedure employing 1-(4-methoxyphenyl)-N-methylmethanamine (151 mg, 1 mmol), 3-phenylpropanal (201 mg, 1.5 mmol), ethyl 2-mercaptoacetate (180 mg, 1.5 mmol), triphenylphosphine (393 mg, 1.5 mmol), 4Å MS (1 g), di-tert-butyl peroxide (292 mg, 2 mmol) in anhydrous dichloromethane (6 mL). The desired product was obtained as yellow oil (301 mg, 85% yield) after purification by flash column chromatography on silica gel (0.5% Et<sub>3</sub>N in ethyl acetate).

<sup>1</sup>H NMR (400 MHz, CDCl<sub>3</sub>) δ 7.32 - 7.09 (m, 6H), 6.95 - 6.72 (m, 3H), 4.03 (q, *J* = 7.1 Hz, 2H), 3.75 (s, 3H), 3.47 - 3.36 (m, 2H), 2.75 (dd, *J* = 13.0, 5.4 Hz, 1H), 2.56 - 2.31 (m, 3H), 2.28 - 2.16 (m, 3H), 2.15 (s, 3H), 1.19 (t, *J* = 7.1 Hz, 3H). <sup>13</sup>C NMR (101 MHz, CDCl<sub>3</sub>) δ 173.1, 159.6, 141.1, 139.9, 129.3, 129.0, 128.2, 126.0, 121.2, 114.3, 112.4, 62.8, 61.4, 60.0, 55.0, 42.5, 38.8, 37.2, 35.4, 14.2. HRMS (ESI) calcd for C<sub>22</sub>H<sub>30</sub>NO<sub>3</sub> [M + H]<sup>+</sup> *m/z* = 356.2220, found: 356.2226. IR *v*<sub>max</sub>/cm<sup>-1</sup> (film): 3026, 2939, 2836, 2788, 1731, 1600, 1585, 1488, 1453, 1371, 1263, 1151, 1031, 782, 745, 699.

### ethyl 3-benzyl-4-((4-fluorobenzyl)(methyl)amino)butanoate (6)

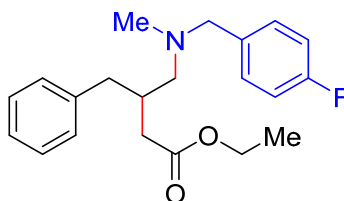

Prepared following the general procedure employing 1-(4-fluorophenyl)-N-methylmethanamine (139 mg, 1 mmol), 3-phenylpropanal (201 mg, 1.5 mmol), ethyl 2-mercaptoacetate (180 mg, 1.5 mmol), triphenylphosphine (393 mg, 1.5 mmol), 4Å MS (1 g), di-tert-butyl peroxide (292 mg, 2 mmol) in anhydrous dichloromethane (6 mL). The desired product was obtained as yellow oil (274 mg, 80% yield) after purification by flash column chromatography on silica gel (0.5% Et<sub>3</sub>N in ethyl acetate).

<sup>1</sup>H NMR (400 MHz, CDCl<sub>3</sub>) δ 7.37 - 7.14 (m, 7H), 7.08 - 6.90 (m, 2H), 4.09 (q, *J* = 7.1 Hz, 2H), 3.44 (s, 2H), 2.78 (dd, *J* = 13.2, 5.7 Hz, 1H), 2.54 (m, 2H), 2.39 (dd, *J* = 15.5, 6.4 Hz, 1H), 2.33 - 2.19 (m, 3H), 2.16 (s, 3H), 1.25 (t, *J* = 7.1 Hz, 3H). <sup>13</sup>C NMR (101 MHz, CDCl<sub>3</sub>) δ 173.14, 161.88 (d, *J* = 244.5 Hz), 139.91, 135.01 (d, *J* = 3.1 Hz), 130.39 (d, *J* = 7.8 Hz), 129.31, 128.25, 126.02, 114.88 (d, *J* = 21.1 Hz), 61.94, 61.37, 60.06, 42.29, 38.88, 37.29, 35.44, 14.22. <sup>19</sup>F NMR (376 MHz, CDCl<sub>3</sub>) δ -116.1 (s). HRMS (ESI) calcd for C<sub>21</sub>H<sub>26</sub>FNO<sub>2</sub> [M + H]<sup>+</sup> *m/z* = 344.2020, found: 344.2024. IR *v*<sub>max</sub>/cm<sup>-1</sup> (film): 2982, 2937, 2797, 1732, 1602, 1508, 1453, 1371, 1221, 1154, 1092, 1030, 820, 745, 700.

#### ethyl 3-benzyl-4-((4-bromobenzyl)methyl)amino)butanoate (7)

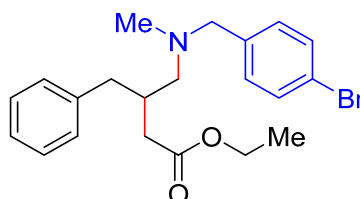

Prepared following general procedure employing 1-(4-bromophenyl)-N-methylmethanamine (199 mg, 1 mmol), 3-phenylpropanal (201 mg, 1.5 mmol), ethyl 2-mercaptoacetate (180 mg, 1.5 mmol), triphenylphosphine (393 mg, 1.5 mmol), 4Å MS (1 g), di-tert-butyl peroxide (292 mg, 2 mmol) in anhydrous dichloromethane (6 mL). The desired product was obtained as a colorless oil (282 mg, 70% yield) after purification by flash column chromatography on silica gel (0.5% Et<sub>3</sub>N in dichloromethane).

<sup>1</sup>H NMR (400 MHz, CDCl<sub>3</sub>) δ 7.45 - 7.33 (m, 2H), 7.31 - 7.08 (m, 7H), 4.04 (q, *J* = 7.1 Hz, 2H), 3.39 (s, 2H), 2.72 (dd, *J* = 13.4, 5.9 Hz, 1H), 2.56 - 2.38 (m, 2H), 2.33 (dd, *J* = 15.5, 6.5 Hz, 1H), 2.28 - 2.14 (m, 3H), 2.12 (s, 3H), 1.21 (t, *J* = 7.1 Hz, 3H). <sup>13</sup>C NMR (101 MHz, CDCl<sub>3</sub>) δ 173.3, 140.0, 138.6, 131.4, 130.8, 129.4, 128.4, 126.2, 120.8, 62.2, 61.6, 60.3, 42.5, 39.0, 37.4, 35.6, 14.4. HRMS (ESI) calcd for C<sub>21</sub>H<sub>27</sub>BrNO<sub>2</sub> [M + H]<sup>+</sup> *m/z* = 404.1220, found: 404.1222. IR *v*<sub>max</sub>/cm<sup>-1</sup> (film): 2930, 2796, 1734, 1486, 1453, 1402, 1371, 1259, 1151, 1097, 1069, 1030, 1011, 798, 745, 700.

#### ethyl 3-benzyl-4-(methyl(naphthalen-1-ylmethyl)amino)butanoate (8)

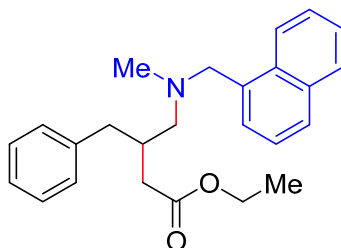

Prepared following the general procedure employing N-methyl-1-(naphthalen-1-yl) methanamine (171mg, 1 mmol), 3-phenylpropanal (201 mg, 1.5 mmol), ethyl 2-mercaptoacetate (180 mg, 1.5 mmol), triphenylphosphine (393 mg, 1.5 mmol), 4Å MS (1 g), di-tert-butyl peroxide (292 mg, 2 mmol) in anhydrous dichloromethane (6 mL). The desired product was obtained as colorless oil (244 mg, 65% yield) after purification by flash column chromatography on silica gel (0.5% Et<sub>3</sub>N in petroleum ether: ethyl acetate = 6:1).

<sup>1</sup>H NMR (400 MHz, CDCl<sub>3</sub>) δ 8.31 - 8.23 (m, 1H), 7.83 (dd, *J* = 6.5, 2.9 Hz, 1H), 7.76 (dd, *J* = 6.7, 2.7 Hz, 1H), 7.53 - 7.33 (m, 4H), 7.24 - 7.01 (m, 5H), 4.00 (q, *J* = 7.1 Hz, 2H), 3.86 (q, *J* = 13.1 Hz, 2H), 2.73 (dt, *J* = 9.0, 4.6 Hz, 1H), 2.45 (dt, *J* = 13.1, 7.0 Hz, 2H), 2.40 - 2.26 (m, 3H), 2.20 (s, 3H), 2.12 (dd, *J* = 15.7, 6.3 Hz, 1H), 1.18 (t, *J* = 7.1 Hz, 3H). <sup>13</sup>C NMR (101 MHz, CDCl<sub>3</sub>) δ 173.4, 140.2, 135.1, 134.0, 132.7, 129.5, 128.5, 128.3, 128.0, 127.6, 126.1, 125.8, 125.7, 125.27, 125.0, 61.9, 61.7, 60.2, 42.7, 39.0, 37.2, 35.6, 14.4. HRMS (ESI) calcd for C<sub>25</sub>H<sub>30</sub>NO<sub>2</sub> [M + H]<sup>+</sup> *m/z* = 376.2271, found: 376.2276. IR *v*<sub>max</sub>/cm<sup>-1</sup> (film): 2968, 2793, 1734, 1438, 1260, 1095, 1028, 796, 742.

#### ethyl 4-(allyl(methyl)amino)-3-benzylbutanoate (9)

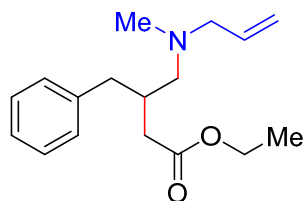

Prepared following the general procedure employing N-methylprop-2-en-1-amine (71 mg, 1 mmol), 3-phenylpropanal (201 mg, 1.5 mmol), ethyl 2-mercaptoacetate (180 mg, 1.5 mmol), triphenylphosphine (393 mg, 1.5 mmol), 4Å MS (1 g), di-tert-butyl peroxide (292 mg, 2 mmol) in anhydrous dichloromethane (6 mL). The desired product was obtained as a colorless oil (225 mg, 82% yield) after purification by flash column chromatography on silica gel (0.5% Et<sub>3</sub>N in dichloromethane).

<sup>1</sup>H NMR (400 MHz, CDCl<sub>3</sub>) δ 7.34 - 7.05 (m, 5H), 5.80 (ddt, *J* = 16.7, 10.2, 6.5 Hz, 1H), 5.22 - 4.98 (m, 2H), 4.04 (q, *J* = 7.1 Hz, 2H), 3.02 - 2.86 (m, 2H), 2.71 (dd, *J* = 13.6, 6.0 Hz, 1H), 2.52 (dd, *J* = 13.6, 7.4 Hz, 1H), 2.39 (dt, *J* = 13.5, 6.8 Hz, 1H), 2.33 - 2.17 (m, 4H), 2.15 (s, 3H), 1.21 (t, *J* = 7.1 Hz, 3H). <sup>13</sup>C NMR (101 MHz, CDCl<sub>3</sub>) δ 173.4, 140.1, 136.1, 129.5, 128.3, 126.1, 117.2, 61.4, 61.2, 60.2, 42.5, 39.1, 37.6, 35.6, 31.6, 29.8, 14.4. HRMS (ESI) calcd for C<sub>17</sub>H<sub>26</sub>NO<sub>2</sub> [M + H]<sup>+</sup> *m/z* = 276.1958, found: 276.1960. IR *v*<sub>max</sub>/cm<sup>-1</sup> (film): 2977, 2928, 1733, 1453, 1371, 1257, 1149, 1031, 918, 744, 700.

#### ethyl 3-benzyl-4-((2-cyanoethyl)(methyl)amino)butanoate (10)

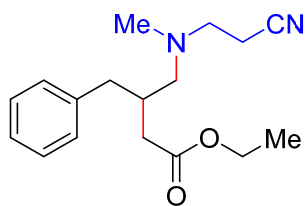

Prepared following the general procedure employing 3-(methylamino)propanenitrile (84 mg, 1 mmol), 3-phenylpropanal (201 mg, 1.5 mmol), ethyl 2-mercaptoacetate (180 mg, 1.5 mmol), triphenylphosphine (393 mg, 1.5 mmol), 4Å MS (1 g), di-tert-butyl peroxide (292 mg, 2 mmol) in anhydrous dichloromethane (6 mL). The desired product was obtained as a yellow oil (184 mg, 64% yield) after purification by flash column chromatography on silica gel (0.5% Et<sub>3</sub>N in ethyl acetate).

<sup>1</sup>H NMR (400 MHz, CDCl<sub>3</sub>) δ 7.29 - 7.21 (m, 2H), 7.20 - 7.09 (m, 3H), 4.04 (q, *J* = 7.1 Hz, 2H), 2.71 (dd, *J* = 13.6, 5.7 Hz, 1H), 2.65 (dd, *J* = 10.5, 3.9 Hz, 2H), 2.53 (dd, *J* = 13.6, 7.0 Hz, 1H), 2.39 (td, *J* = 6.9, 1.5 Hz, 2H), 2.37 - 2.22 (m, 5H), 2.21 (s, 3H), 1.20 (t, *J* = 7.1 Hz, 3H). <sup>13</sup>C NMR (101 MHz, CDCl<sub>3</sub>) δ 173.0, 139.6, 129.3, 128.3, 126.1, 119.0, 61.0, 60.1, 53.3, 41.9, 38.6, 36.9, 35.5, 15.9, 14.2. HRMS (ESI) calcd for C<sub>17</sub>H<sub>25</sub>N<sub>2</sub>O<sub>2</sub> [M + H]<sup>+</sup> *m/z* = 289.1911, found: 289.1912. IR *v*<sub>max</sub>/cm<sup>-1</sup> (film): 3026, 2950, 2852, 2806, 1728, 1495, 1453, 1373, 1259, 1209, 1152, 1030, 799, 747, 701.

#### ethyl 3-benzyl-4-(cyclohexyl(methyl)amino)butanoate (11)

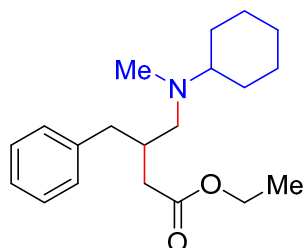

Prepared following the general procedure employing N-methylcyclohexanamine (113 mg, 1 mmol), 3-phenylpropanal (201 mg, 1.5 mmol), ethyl 2-mercaptoacetate (180 mg, 1.5 mmol), triphenylphosphine (393 mg, 1.5 mmol), 4Å MS (1 g), di-tert-butyl peroxide (292 mg, 2 mmol) in anhydrous dichloromethane (6 mL). The desired product was obtained as colorless oil (301 mg, 95% yield) after purification by flash column chromatography on silica gel (0.5% Et<sub>3</sub>N in ethyl acetate).

<sup>1</sup>H NMR (400 MHz, CDCl<sub>3</sub>) δ 7.21 - 7.09 (m, 5H), 3.97 (q, *J* = 7.1 Hz, 2H), 2.66 (dd, *J* = 13.6, 5.4 Hz, 1H), 2.42 (dd, *J* = 13.6, 7.1 Hz, 1H), 2.34 - 2.15 (m, 5H), 2.15 - 2.04 (m, 4H), 1.75 - 1.45 (m, 5H), 1.21 - 0.93 (m, 8H). <sup>13</sup>C NMR (101 MHz, CDCl<sub>3</sub>) δ 173.3, 140.3, 129.2, 128.2, 125.8, 63.5, 59.9, 57.9, 39.0, 37.8, 37.4, 35.9, 28.6, 28.4, 26.4, 26.1, 14.2. HRMS (ESI) calcd for C<sub>20</sub>H<sub>32</sub>NO<sub>2</sub> [M + H]<sup>+</sup> *m/z* = 318.2428, found: 318.2429. IR *v*<sub>max</sub>/cm<sup>-1</sup> (film): 2928, 2854, 1734, 1495, 1451, 1370, 1259, 1144, 1098, 1037, 946, 796, 743, 700.

#### ethyl 3-benzyl-4-(diethylamino)butanoate (12)

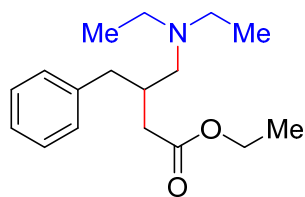

Prepared following the general procedure employing diethylamine (73 mg, 1 mmol), 3-phenylpropanal (201 mg, 1.5 mmol), ethyl 2-mercaptoacetate (180 mg, 1.5 mmol), triphenylphosphine (393 mg, 1.5 mmol), 4Å MS (1 g), di-tert-butyl peroxide (292 mg, 2 mmol) in anhydrous dichloromethane (6 mL). The desired product was obtained as colorless oil (244 mg, 88% yield) after purification by flash column chromatography on silica gel (0.5% Et<sub>3</sub>N in dichloromethane).

<sup>1</sup>H NMR (400 MHz, CDCl<sub>3</sub>) δ 7.25 (dd, *J* = 10.5, 4.4 Hz, 2H), 7.17 - 7.14 (m, 3H), 4.03 (q, *J* = 7.1 Hz, 2H), 2.73 (dd, *J* = 13.6, 5.6 Hz, 1H), 2.57 - 2.38 (m, 5H), 2.37 - 2.13 (m, 5H), 1.20 (t, *J* = 7.1 Hz, 3H), 0.94 (t, *J* = 7.1 Hz, 6H). <sup>13</sup>C NMR (101 MHz, CDCl<sub>3</sub>) δ 173.5, 140.4, 129.4, 128.3, 126.0, 60.2, 57.4, 47.4, 39.2, 37.6, 36.0, 14.4, 11.7. HRMS (ESI) calcd for C<sub>17</sub>H<sub>28</sub>NO<sub>2</sub> [M + H]<sup>+</sup> *m/z* = 278.2115, found: 278.2115. IR *v*<sub>max</sub>/cm<sup>-1</sup> (film): 2968, 2930, 1733, 1453, 1371, 1256, 1202, 1148, 1031, 744, 700.

#### ethyl 3-benzyl-4-(ethyl(pyridin-4-ylmethyl)amino)butanoate (13)

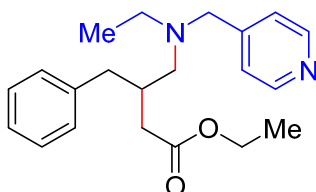

Prepared following the general procedure employing N-(pyridin-4-ylmethyl) ethanamine (136 mg, 1 mmol), 3-phenylpropanal (201 mg, 1.5 mmol), ethyl 2-mercaptoacetate (180 mg, 1.5 mmol), triphenylphosphine (393 mg, 1.5 mmol), 4Å MS (1 g), di-tert-butyl peroxide (292 mg, 2 mmol) in anhydrous dichloromethane (6 mL). The desired product was obtained as colorless oil (272 mg, 80% yield) after purification by flash column chromatography on silica gel (0.5% Et<sub>3</sub>N in ethyl acetate).

<sup>1</sup>H NMR (400 MHz, CDCl<sub>3</sub>) δ 8.49 (dd, *J* = 4.4, 1.6 Hz, 2H), 7.29 - 7.14 (m, 5H), 7.11 (dd, *J* = 5.1, 3.1 Hz, 2H), 4.04 (q, *J* = 7.1 Hz, 2H), 3.51 (dd, *J* = 37.2, 14.8 Hz, 2H), 2.75 (dd, *J* = 13.5, 5.4 Hz, 1H), 2.54 - 2.24 (m, 7H), 2.17 (dd, *J* = 17.7, 8.1 Hz, 1H), 1.20 (t, *J* = 7.1 Hz, 3H), 0.97 (t, *J* = 7.1 Hz, 3H). <sup>13</sup>C NMR (101 MHz, CDCl<sub>3</sub>) δ 173.3, 149.6, 140.1, 129.3, 128.4, 126.2, 123.9, 60.3, 57.9, 57.7, 48.1, 39.1, 37.3, 35.8, 14.4, 11.7. HRMS (ESI) calcd for C<sub>21</sub>H<sub>29</sub>N<sub>2</sub>O<sub>2</sub> [M + H]<sup>+</sup> *m/z* = 341.2224, found: 341.2225. IR *v*<sub>max</sub>/cm<sup>-1</sup> (film): 2966, 2939, 1734, 1413, 1370, 1259, 1201, 1151, 1029, 799, 743, 701.

#### ethyl 3-benzyl-4-(benzyl(2-ethoxy-2-oxoethyl)amino)butanoate (14)

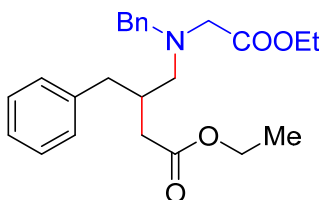

Prepared following the general procedure employing ethyl benzylglycinate (193 mg, 1 mmol), 3-phenylpropanal (201 mg, 1.5 mmol), ethyl 2-mercaptoacetate (180 mg, 1.5 mmol), triethyl phosphite (249 mg, 1.5 mmol), 4Å MS (1 g), di-tert-butyl peroxide (292 mg, 2 mmol) in anhydrous dichloromethane (6 mL). The desired product was obtained as pink oil (222 mg, 56% yield) after purification by flash column chromatography on silica gel (0.5% Et<sub>3</sub>N in petroleum ether: ethyl acetate = 8:1).

<sup>1</sup>H NMR (400 MHz, CDCl<sub>3</sub>) δ 7.36 - 7.20 (m, 7H), 7.20 - 7.03 (m, 3H), 4.10 (q, *J* = 7.1 Hz, 2H), 4.04 (q, *J* = 7.1 Hz, 2H), 3.75 (dd, *J* = 29.9, 13.5 Hz, 2H), 3.26 (s, 2H), 2.76 (dd, *J* = 13.5, 5.5 Hz, 1H), 2.61 (dd, *J* = 12.7, 5.8 Hz, 1H), 2.55 - 2.33 (m, 4H), 2.18 (dd, *J* = 17.6, 8.4 Hz, 1H), 1.22 (td, *J* = 7.1, 5.1 Hz, 6H). <sup>13</sup>C NMR (101 MHz, CDCl<sub>3</sub>) δ 173.2, 171.3, 134.0, 138.9, 129.2, 129.0, 128.2, 127.0, 126.0, 60.1, 60.1, 58.4, 58.0, 54.4, 38.7, 36.9, 35.8, 14.2, 14.2. HRMS (ESI) calcd for C<sub>24</sub>H<sub>32</sub>NO<sub>4</sub> [M + H]<sup>+</sup> *m/z* = 398.2326, found: 398.2330. IR ν<sub>max</sub>/cm<sup>-1</sup> (film): 2980, 2927, 1734, 1451, 1370, 1256, 1184, 1150, 1028, 742, 699.

#### ethyl 3-benzyl-4-(benzyl(3-ethoxy-3-oxopropyl)amino)butanoate (15)

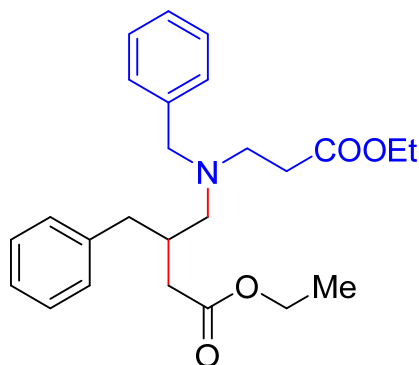

Prepared following the general procedure employing ethyl 3-(benzylamino)propanoate (207mg, 1 mmol), 3-phenylpropanal (201 mg, 1.5 mmol), ethyl 2-mercaptoacetate (180 mg, 1.5 mmol), triphenylphosphine (393 mg, 1.5 mmol), 4Å MS (1 g), di-tert-butyl peroxide (292 mg, 2 mmol) in anhydrous dichloromethane (6 mL). The desired product was obtained as colorless oil (378 mg, 92% yield) after purification by flash column chromatography on silica gel (0.5% Et<sub>3</sub>N in dichloromethane).

<sup>1</sup>H NMR (400 MHz, CDCl<sub>3</sub>) δ 7.25 - 7.08 (m, 8H), 7.04 (d, *J* = 7.1 Hz, 2H), 4.09 - 3.90 (m, 4H), 3.53 - 3.41 (m, 2H), 2.79 - 2.59 (m, 3H), 2.41 - 2.17 (m, 7H), 2.07 (dd, *J* = 15.4, 5.7 Hz, 1H), 1.15 (td, *J* = 7.1, 4.3 Hz, 6H). <sup>13</sup>C NMR (101 MHz, CDCl<sub>3</sub>) δ 173.3, 172.8, 140.3, 139.3, 129.4, 129.1, 128.4, 128.3, 127.1, 126.1, 60.5, 60.2, 58.9, 58.0, 50.1, 38.9, 37.1, 35.7, 32.6, 14.4, 14.3. HRMS (ESI) calcd for C<sub>25</sub>H<sub>34</sub>NO<sub>4</sub> [M + H]<sup>+</sup> *m/z* = 412.2482, found: 412.2482. IR ν<sub>max</sub>/cm<sup>-1</sup> (film): 3028, 2976, 2908, 1734, 1451, 1370, 1258, 1179, 1029, 800, 741, 700.

#### ethyl 3-benzyl-4-(dibenzylamino)butanoate (16)

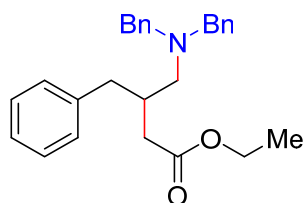



Prepared following the general procedure employing dibenzylamine (197 mg, 1 mmol), 3-phenylpropanal (201 mg, 1.5 mmol), ethyl 2-mercaptoacetate (180 mg, 1.5 mmol), triphenylphosphine (393 mg, 1.5 mmol), 4Å MS (1 g), di-tert-butyl peroxide (292 mg, 2 mmol) in anhydrous dichloromethane (6 mL). The desired product was obtained as colorless oil (320 mg, 80% yield) after purification by flash column chromatography on silica gel (0.5% Et<sub>3</sub>N in petroleum ether: ethyl acetate = 15:1).

<sup>1</sup>H NMR (400 MHz, CDCl<sub>3</sub>) δ 7.36 - 7.13 (m, 13H), 7.06 (d, *J* = 6.9 Hz, 2H), 4.02 (q, *J* = 7.1 Hz, 2H), 3.52 (q, *J* = 13.6 Hz, 4H), 2.76 (dd, *J* = 13.4, 5.9 Hz, 1H), 2.51 - 2.41 (m, 1H), 2.41 - 2.20 (m, 4H), 2.06 (dd, *J* = 15.8, 6.6 Hz, 1H), 1.19 (t, *J* = 7.1 Hz, 3H). <sup>13</sup>C NMR (101 MHz, CDCl<sub>3</sub>) δ 173.4, 140.4, 139.5, 129.4, 129.2, 128.4, 128.3, 127.0, 126.1, 60.3, 58.9, 57.7, 39.1, 37.3, 35.7, 29.9, 14.4. HRMS (ESI) calcd for C<sub>27</sub>H<sub>32</sub>NO<sub>2</sub> [M + H]<sup>+</sup> *m/z* = 402.2428, found: 402.2429. IR ν<sub>max</sub>/cm<sup>-1</sup> (film): 2960, 1734, 1437, 1420, 1261, 1027, 873, 798, 742, 700.

#### ethyl 3-benzyl-4-(bis(4-methoxybenzyl)amino)butanoate (17)

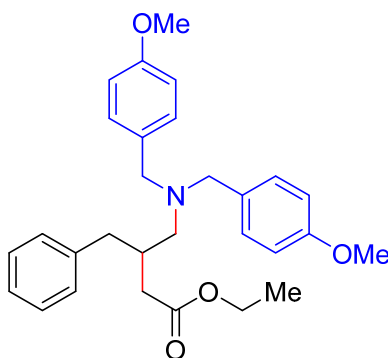

Prepared following the general procedure employing bis(4-methoxybenzyl)amine (257mg, 1 mmol), 3-phenylpropanal (201 mg, 1.5 mmol), ethyl 2-mercaptoacetate (180 mg, 1.5 mmol), triphenylphosphine (393 mg, 1.5 mmol), 4Å MS (1 g), di-tert-butyl peroxide (292 mg, 2 mmol) in anhydrous dichloromethane (6 mL). The desired product was obtained as colorless oil (277 mg, 60% yield) after purification by flash column chromatography on silica gel (0.5% Et<sub>3</sub>N in dichloromethane).

<sup>1</sup>H NMR (400 MHz, CDCl<sub>3</sub>) δ 7.18 - 7.05 (m, 7H), 7.01 (d, *J* = 7.0 Hz, 2H), 6.76 (d, *J* = 8.6 Hz, 4H), 3.96 (q, *J* = 7.1 Hz, 2H), 3.73 (s, 6H), 3.38 (q, *J* = 13.4 Hz, 4H), 2.67 (dd, *J* = 13.3, 5.9 Hz, 1H), 2.39 (dt, *J* = 13.3, 6.7 Hz, 1H), 2.34 - 2.09 (m, 4H), 1.99 (dd, *J* = 15.6, 6.6 Hz, 1H), 1.14 (t, *J* = 7.1 Hz, 3H). <sup>13</sup>C NMR (101 MHz, CDCl<sub>3</sub>) δ 173.5, 158.7, 140.5, 131.6, 130.3, 129.4, 128.4, 126.0, 113.7, 60.3, 58.0, 57.3, 55.4, 39.1, 37.4, 35.7, 14.4. HRMS (ESI) calcd for C<sub>29</sub>H<sub>36</sub>NO<sub>4</sub> [M + H]<sup>+</sup> *m/z* = 462.2639, found: 462.2643. IR ν<sub>max</sub>/cm<sup>-1</sup> (film): 2958, 1734, 1511, 1256, 1096, 1033, 801, 743, 700.

#### ethyl 4-(azetidin-1-yl)-3-benzylbutanoate (18)

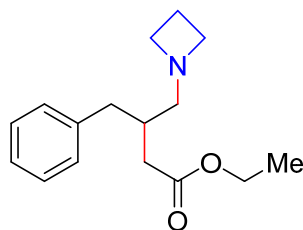



Prepared following the general procedure employing azetidine (57 mg, 1 mmol), 3-phenylpropanal (201 mg, 1.5 mmol), ethyl 2-mercaptoacetate (180 mg, 1.5 mmol), triphenylphosphine (393 mg, 1.5 mmol), 4Å MS (1 g), di-tert-butyl peroxide (292 mg, 2 mmol) in anhydrous dichloromethane (6 mL). The desired product was obtained as colorless oil (211 mg, 81% yield) after purification by flash column chromatography on silica gel (0.5% Et<sub>3</sub>N in dichloromethane: methanol = 20:1).

<sup>1</sup>H NMR (400 MHz, CDCl<sub>3</sub>) δ 7.29 - 7.21 (m, 2H), 7.21 - 7.05 (m, 3H), 4.15 - 3.94 (m, 2H), 3.20 (tt, *J* = 13.6, 6.9 Hz, 4H), 2.71 (dd, *J* = 13.6, 6.1 Hz, 1H), 2.51 (dd, *J* = 13.6, 7.3 Hz, 1H), 2.42 - 2.10 (m, 5H), 2.04 (p, *J* = 7.1 Hz, 2H), 1.21 (t, *J* = 7.1 Hz, 3H). <sup>13</sup>C NMR (101 MHz, CDCl<sub>3</sub>) δ 173.2, 139.9, 129.4, 128.4, 126.2, 63.2, 60.3, 55.7, 38.8, 37.1, 35.8, 17.6, 14.4. HRMS (ESI) calcd for C<sub>16</sub>H<sub>24</sub>NO<sub>2</sub> [M + H]<sup>+</sup> *m/z* = 262.1802, found: 262.1805. IR *v*<sub>max</sub>/cm<sup>-1</sup> (film): 2956, 2817, 1732, 1691, 1495, 1452, 1370, 1246, 1198, 1150, 1030, 744, 700.

#### ethyl 3-benzyl-4-(pyrrolidin-1-yl)butanoate (19)

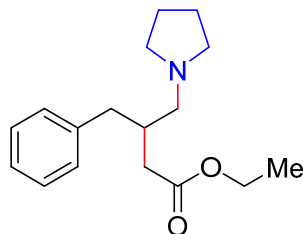

Prepared following the general procedure employing pyrrolidine (71 mg, 1 mmol), 3-phenylpropanal (201 mg, 1.5 mmol), ethyl 2-mercaptoacetate (180 mg, 1.5 mmol), triphenylphosphine (393 mg, 1.5 mmol), 4Å MS (1 g), di-tert-butyl peroxide (292 mg, 2 mmol) in anhydrous dichloromethane (6 mL). The desired product was obtained as colorless oil (239 mg, 87% yield) after purification by flash column chromatography on silica gel (0.5% Et<sub>3</sub>N in dichloromethane: methanol = 20:1).

<sup>1</sup>H NMR (400 MHz, CDCl<sub>3</sub>) δ 7.28 - 7.23 (m, 2H), 7.17 (dd, *J* = 10.4, 4.5 Hz, 3H), 4.03 (q, *J* = 7.1 Hz, 2H), 2.74 (dd, *J* = 13.5, 4.8 Hz, 1H), 2.59 - 2.28 (m, 9H), 2.20 (dd, *J* = 14.9, 5.8 Hz, 1H), 1.80 - 1.63 (m, 4H), 1.21 (t, *J* = 7.1 Hz, 3H). <sup>13</sup>C NMR (101 MHz, CDCl<sub>3</sub>) δ 173.4, 140.0, 129.5, 128.4, 126.1, 60.3, 60.2, 54.3, 39.1, 37.7, 36.6, 23.7, 14.4. HRMS (ESI) calcd for C<sub>17</sub>H<sub>26</sub>NO<sub>2</sub> [M + H]<sup>+</sup> *m/z* = 276.1958, found: 276.1958. IR *v*<sub>max</sub>/cm<sup>-1</sup> (film): 2960, 2928, 1734, 1451, 1370, 1255, 1151, 1030, 742, 700.

#### ethyl 3-benzyl-4-(2-(methoxymethyl)pyrrolidin-1-yl)butanoate (20)

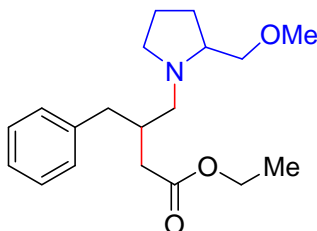

Prepared following the general procedure employing 2-(methoxymethyl) pyrrolidine (115 mg, 1 mmol), 3-phenylpropanal (201 mg, 1.5 mmol), ethyl 2-mercaptoacetate (180 mg, 1.5 mmol), triphenylphosphine (393 mg, 1.5 mmol), 4Å MS (1 g), di-tert-butyl peroxide (292 mg, 2 mmol) in anhydrous dichloromethane (6 mL). The desired product was obtained as colorless oil (274 mg,

86% yield) after purification by flash column chromatography on silica gel (0.5% Et<sub>3</sub>N in ethyl acetate). The dr value (1.5:1) was based on <sup>1</sup>H NMR spectra.

<sup>1</sup>H NMR (400 MHz, CDCl<sub>3</sub>) δ 7.27 - 7.08 (m, 5H), 4.08 - 3.93 (m, 2H), 3.37 - 3.32 (m, 0.6H), 3.30 (s, 1.2 H, minor diastereomer), 3.29 (s, 1.8H, major diastereomer), 3.16 - 3.12 (m, 0.4H), 3.10 - 2.93 (m, 1H), 2.70 - 2.09 (m, 8H), 2.02 - 1.41 (m, 5H), 1.19 (dt, *J* = 8.7, 7.1 Hz, 3H). <sup>13</sup>C NMR (101 MHz, CDCl<sub>3</sub>, double carbon signals) δ 173.4, 173.0, 140.3, 140.0, 129.4, 129.2, 128.2, 128.1, 125.9, 125.8, 76.9, 76.5, 64.0, 63.4, 60.0, 60.0, 59.9, 59.8, 58.9, 58.9, 54.8, 54.4, 39.5, 38.4, 37.7, 37.2, 37.0, 36.7, 28.7, 28.6, 23.2, 23.2, 14.2, 14.2. HRMS (ESI) calcd for C<sub>19</sub>H<sub>30</sub>NO<sub>3</sub> [M + H]<sup>+</sup> *m/z* = 320.2220, found: 320.2222. IR *v*<sub>max</sub>/cm<sup>-1</sup> (film): 2929, 2809, 1732, 1453, 1372, 1254, 1198, 1151, 1119, 1031, 745, 700.

### ethyl 3-benzyl-4-(2-phenylpyrrolidin-1-yl) butanoate (21)

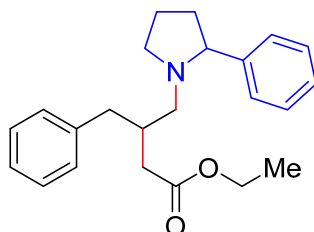

Prepared following the general procedure employing 2-phenylpyrrolidine (147 mg, 1 mmol), 3-phenylpropanal (201 mg, 1.5 mmol), ethyl 2-mercaptoacetate (180 mg, 1.5 mmol), triphenylphosphine (393 mg, 1.5 mmol), 4Å MS (1 g), di-tert-butyl peroxide (292 mg, 2 mmol) in anhydrous dichloromethane (6 mL). The desired product was obtained as colorless oil (291 mg, 83% yield) after purification by flash column chromatography on silica gel (0.5% Et<sub>3</sub>N in dichloromethane). The dr value (7:1) was based on HPLC spectra.

<sup>1</sup>H NMR (400 MHz, CDCl<sub>3</sub>) δ 7.36 - 7.12 (m, 8H), 7.07 (d, *J* = 7.1 Hz, 2H), 4.15 - 3.95 (m, 2H), 3.32 (td, *J* = 8.5, 2.4 Hz, 1H), 3.16 (t, *J* = 8.2 Hz, 1H), 2.47 (m, 4H), 2.26 (t, *J* = 11.1 Hz, 1H), 2.17 - 1.94 (m, 3H), 1.94 - 1.51 (m, 4H), 1.25 (t, *J* = 7.1 Hz, 3H). <sup>13</sup>C NMR (101 MHz, CDCl<sub>3</sub>) δ 173.7, 144.4, 140.3, 129.2, 128.4, 128.3, 127.7, 127.0, 126.0, 70.5, 60.1, 58.8, 53.7, 39.8, 37.8, 36.6, 35.6, 22.8, 14.4. HRMS (ESI) calcd for C<sub>23</sub>H<sub>30</sub>NO<sub>2</sub> [M + H]<sup>+</sup> *m/z* = 352.2271, found: 352.2276. IR *v*<sub>max</sub>/cm<sup>-1</sup> (film): 2965, 1732, 1493, 1452, 1371, 1198, 1150, 1118, 1029, 912, 747, 700.

### ethyl 3-benzyl-4-(piperidin-1-yl) butanoate (22)

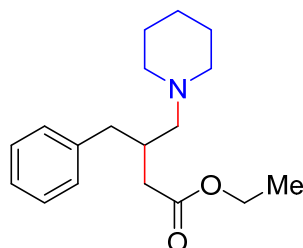

Prepared following the general procedure employing piperidine (85 mg, 1 mmol), 3-phenylpropanal (201 mg, 1.5 mmol), ethyl 2-mercaptoacetate (180 mg, 1.5 mmol), triphenylphosphine (393 mg, 1.5 mmol), 4Å MS (1 g), di-tert-butyl peroxide (292 mg, 2 mmol) in anhydrous dichloromethane (6 mL). The desired product was obtained as colorless oil (260 mg,

90% yield) after purification by flash column chromatography on silica gel (0.5% Et<sub>3</sub>N in dichloromethane: methanol = 20:1).

<sup>1</sup>H NMR (400 MHz, CDCl<sub>3</sub>) δ 7.28 - 7.22 (m, 2H), 7.18 - 7.15(m, 3H), 4.12 - 3.99 (m, 2H), 2.69 (dd, *J* = 13.5, 6.0 Hz, 1H), 2.54 (dd, *J* = 13.5, 7.3 Hz, 1H), 2.50 - 2.12 (m, 8H), 2.09 (dd, *J* = 12.4, 8.4 Hz, 1H), 1.56 - 1.44 (m, 4H), 1.38 (m, 2H), 1.22 (t, *J* = 7.1 Hz, 3H). <sup>13</sup>C NMR (101 MHz, CDCl<sub>3</sub>) δ 173.4, 140.1, 129.4, 128.2, 126.0, 63.4, 60.1, 55.0, 39.1, 37.8, 34.8, 26.2, 24.6, 14.3. HRMS (ESI) calcd for C<sub>18</sub>H<sub>28</sub>NO<sub>2</sub> [M + H]<sup>+</sup> *m/z* = 290.2115, found: 290.2117. IR *v*<sub>max</sub>/cm<sup>-1</sup> (film): 2934, 1733, 1453, 1372, 1298, 1210, 1155, 1114, 1038, 744, 700.

### ethyl 3-benzyl-4-(octahydroquinolin-1(2H)-yl)butanoate (23)

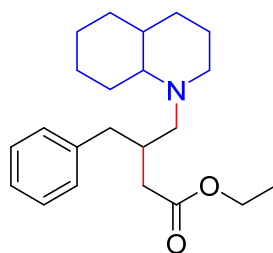

Prepared following the general procedure employing decahydroquinoline (139 mg, 1 mmol), 3-phenylpropanal (201 mg, 1.5 mmol), ethyl 2-mercaptoacetate (180 mg, 1.5 mmol), triphenylphosphine (393 mg, 1.5 mmol), 4Å MS (1 g), di-tert-butyl peroxide (292 mg, 2 mmol) in anhydrous dichloromethane (6 mL). The desired product was obtained as colorless oil (274 mg, 80% yield) after purification by flash column chromatography on silica gel (0.5% Et<sub>3</sub>N in petroleum ether: ethyl acetate = 6:1). The dr value (2:1) was determined by <sup>1</sup>H NMR spectra.

<sup>1</sup>H NMR (400 MHz, CDCl<sub>3</sub>) δ 7.28 - 7.10 (m, 5H), 4.04 (qd, *J* = 7.1, 1.4 Hz, 2H), 2.99 - 2.88 (m, 1.2H, major diastereomer), 2.88 - 2.78 (m, 0.6H, minor diastereomer), 2.70 - 1.99 (m, 8H), 1.93 - 1.78 (m, 2H), 1.66 - 1.44 (m, 6H), 1.22 - 0.87 (m, 8H). <sup>13</sup>C NMR (101 MHz, CDCl<sub>3</sub>, double carbon signals) δ 173.6, 173.5, 140.6, 140.4, 129.5, 129.3, 128.3, 128.3, 126.0, 126.0, 68.4, 67.4, 60.2, 60.1, 57.6, 56.9, 55.7, 54.8, 42.4, 42.0, 39.6, 39.1, 38.2, 37.7, 37.5, 36.1, 33.5, 33.4, 32.8, 31.7, 31.1, 30.9, 30.3, 29.8, 26.2, 26.2, 26.0, 26.0, 25.7, 14.4. HRMS (ESI) calcd for C<sub>22</sub>H<sub>34</sub>NO<sub>2</sub> [M + H]<sup>+</sup> *m/z* = 344.2584, found: 344.2587. IR *v*<sub>max</sub>/cm<sup>-1</sup> (film): 2924, 2853, 1733, 1451, 1185, 1148, 1031, 748, 699.

### ethyl 1-(2-benzyl-4-ethoxy-4-oxobutyl)piperidine-4-carboxylate (24)

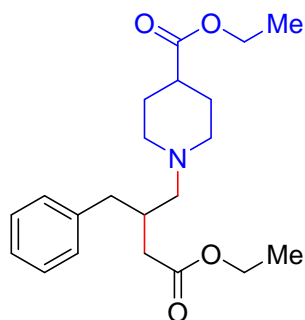

Prepared following the general procedure employing ethyl piperidine-4-carboxylate (157 mg, 1 mmol), 3-phenylpropanal (201 mg, 1.5 mmol), ethyl 2-mercaptoacetate (180 mg, 1.5 mmol), triphenylphosphine (393 mg, 1.5 mmol), 4Å MS (1 g), di-tert-butyl peroxide (292 mg, 2 mmol) in anhydrous dichloromethane (6 mL). The desired product was obtained as colorless oil (318 mg,

88% yield) after purification by flash column chromatography on silica gel (0.5% Et<sub>3</sub>N in petroleum ether: ethyl acetate = 8:1).

<sup>1</sup>H NMR (400 MHz, CDCl<sub>3</sub>) δ 7.25 - 6.99 (m, 5H), 4.11 - 3.95 (m, 4H), 2.76 (dd, *J* = 21.4, 9.5 Hz, 2H), 2.63 (dd, *J* = 8.9, 4.5 Hz, 1H), 2.55 - 2.34 (m, 2H), 2.27 - 1.90 (m, 6H), 1.86 - 1.55 (m, 5H), 1.27 - 1.10 (m, 6H). <sup>13</sup>C NMR (101 MHz, CDCl<sub>3</sub>) δ 175.0, 173.0, 139.6, 129.2, 128.0, 125.8, 62.5, 60.0, 59.8, 53.7, 52.7, 41.1, 38.8, 37.5, 34.7, 28.4, 28.2, 14.1, 14.1. HRMS (ESI) calcd for C<sub>21</sub>H<sub>32</sub>NO<sub>4</sub> [M + H]<sup>+</sup> *m/z* = 362.2326, found: 362.2327. IR *v*<sub>max</sub>/cm<sup>-1</sup> (film): 2946, 1732, 1452, 1374, 1258, 1179, 1046, 745, 701.

#### ethyl 4-([1,4'-bipiperidin]-1'-yl)-3-benzylbutanoate (25)

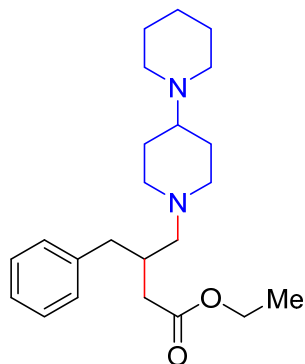

Prepared following the general procedure employing 1,4'-bipiperidine (168 mg, 1 mmol), 3-phenylpropanal (201 mg, 1.5 mmol), ethyl 2-mercaptoacetate (180 mg, 1.5 mmol), triphenylphosphine (393 mg, 1.5 mmol), 4Å MS (1 g), di-tert-butyl peroxide (292 mg, 2 mmol) in anhydrous dichloromethane (6 mL). The desired product was obtained as colorless oil (290 mg, 78% yield) after purification by flash column chromatography on silica gel (0.5% Et<sub>3</sub>N in dichloromethane: methanol = 20:1).

<sup>1</sup>H NMR (400 MHz, CDCl<sub>3</sub>) δ 7.30 - 6.96 (m, 5H), 4.00 (dq, *J* = 10.9, 7.2 Hz, 2H), 2.86 (t, *J* = 11.1 Hz, 2H), 2.71 - 2.43 (m, 6H), 2.43 - 2.02 (m, 6H), 1.98 - 1.72 (m, 4H), 1.71 - 1.58 (m, 4H), 1.58 - 1.34 (m, 4H), 1.17 (t, *J* = 7.1 Hz, 3H). <sup>13</sup>C NMR (101 MHz, CDCl<sub>3</sub>) δ 173.2, 139.8, 129.3, 128.2, 126.0, 63.2, 62.2, 60.1, 53.9, 52.9, 50.0, 38.9, 37.6, 34.9, 27.5, 27.3, 25.4, 24.2, 14.2. HRMS (ESI) calcd for C<sub>23</sub>H<sub>37</sub>N<sub>2</sub>O<sub>2</sub> [M + H]<sup>+</sup> *m/z* = 373.2850, found: 373.2850. IR *v*<sub>max</sub>/cm<sup>-1</sup> (film): 2932, 1732, 1452, 1373, 1148, 1112, 1030, 744, 700.

#### ethyl 3-benzyl-4-(4-bromopiperidin-1-yl)butanoate (26)

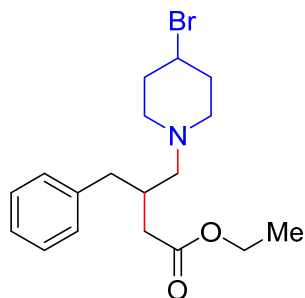

Prepared following the general procedure employing 4-bromopiperidine (163 mg, 1 mmol), 3-phenylpropanal (201 mg, 1.5 mmol), ethyl 2-mercaptoacetate (180 mg, 1.5 mmol), triphenylphosphine (393 mg, 1.5 mmol), 4Å MS (1 g), di-tert-butyl peroxide (292 mg, 2 mmol) in

anhydrous dichloromethane (6 mL). The desired product was obtained as colorless oil (304 mg, 83% yield) after purification by flash column chromatography on silica gel (0.5% Et<sub>3</sub>N in dichloromethane).

<sup>1</sup>H NMR (400 MHz, CDCl<sub>3</sub>) δ 7.30 - 7.09 (m, 5H), 4.20 - 3.94 (m, 3H), 2.79 - 2.59 (m, 3H), 2.54 (dd, *J* = 13.6, 7.2 Hz, 1H), 2.47 - 2.33 (m, 1H), 2.32 - 2.02 (m, 8H), 2.01 - 1.89 (m, 2H), 1.22 (t, *J* = 7.1 Hz, 3H). <sup>13</sup>C NMR (101 MHz, CDCl<sub>3</sub>) δ 173.4, 139.9, 129.4, 128.4, 126.2, 62.4, 60.3, 52.6, 50.4, 39.1, 37.8, 36.7, 35.0, 14.4. HRMS (ESI) calcd for C<sub>18</sub>H<sub>27</sub>BrNO<sub>2</sub> [M + H]<sup>+</sup> *m/z* = 368.1220, found: 368.1222. IR *v*<sub>max</sub>/cm<sup>-1</sup> (film): 2949, 1731, 1451, 1371, 1300, 1250, 1195, 1149, 1031, 996, 743, 700.

#### ethyl 3-benzyl-4-(4-cyanopiperidin-1-yl)butanoate (27)

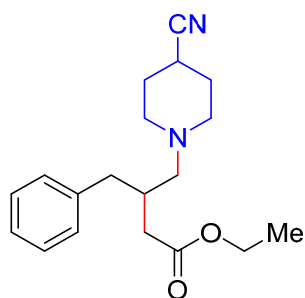

Prepared following the general procedure employing piperidine-4-carbonitrile (110 mg, 1 mmol), 3-phenylpropanal (201 mg, 1.5 mmol), ethyl 2-mercaptoacetate (180 mg, 1.5 mmol), triphenylphosphine (393 mg, 1.5 mmol), 4Å MS (1 g), di-tert-butyl peroxide (292 mg, 2 mmol) in anhydrous dichloromethane (6 mL). The desired product was obtained as colorless oil (270 mg, 86% yield) after purification by flash column chromatography on silica gel (0.5% Et<sub>3</sub>N in dichloromethane: methanol = 100:1).

<sup>1</sup>H NMR (400 MHz, CDCl<sub>3</sub>) δ 7.27 - 7.21 (m, 2H), 7.19 - 7.10 (m, 3H), 4.09 - 4.00 (m, 2H), 2.66 - 2.50 (m, 5H), 2.46 - 2.34 (m, 1H), 2.34 - 2.04 (m, 6H), 1.90 - 1.70 (m, 4H), 1.21 (t, *J* = 7.1 Hz, 3H). <sup>13</sup>C NMR (101 MHz, CDCl<sub>3</sub>) δ 173.2, 139.7, 129.3, 128.3, 126.1, 121.9, 62.6, 60.1, 51.9, 51.7, 38.9, 37.7, 34.7, 29.0, 28.9, 26.2, 14.3. HRMS (ESI) calcd for C<sub>19</sub>H<sub>27</sub>N<sub>2</sub>O<sub>2</sub> [M + H]<sup>+</sup> *m/z* = 315.2067, found: 315.2067. IR *v*<sub>max</sub>/cm<sup>-1</sup> (film): 2950, 2931, 1729, 1452, 1373, 1252, 1201, 1139, 1040, 746, 701.

#### ethyl 3-benzyl-4-(4-methoxypiperidin-1-yl)butanoate (28)

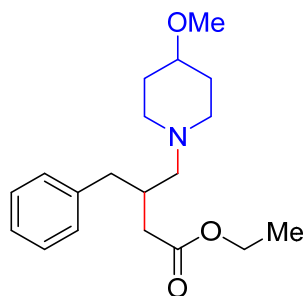

Prepared following the general procedure employing 4-methoxypiperidine (115 mg, 1 mmol), 3-phenylpropanal (201 mg, 1.5 mmol), ethyl 2-mercaptoacetate (180 mg, 1.5 mmol), triphenylphosphine (393 mg, 1.5 mmol), 4Å MS (1 g), di-tert-butyl peroxide (292 mg, 2 mmol) in

anhydrous dichloromethane (6 mL). The desired product was obtained as colorless oil (304 mg, 95% yield) after purification by flash column chromatography on silica gel (0.5% Et<sub>3</sub>N in petroleum ether: ethyl acetate = 3:1).

<sup>1</sup>H NMR (400 MHz, CDCl<sub>3</sub>) δ 7.27 - 7.06 (m, 5H), 4.08 - 3.94 (m, 2H), 3.25 (s, 3H), 3.15 - 3.01 (m, 1H), 2.74 - 2.44 (m, 4H), 2.44 - 2.32 (m, 1H), 2.29 - 2.01 (m, 5H), 1.99 - 1.72 (m, 3H), 1.53 - 1.39 (m, 2H), 1.17 (t, *J* = 7.1 Hz, 3H). <sup>13</sup>C NMR (101 MHz, CDCl<sub>3</sub>) δ 173.1, 139.7, 129.2, 128.1, 125.9, 76.5, 62.3, 59.9, 55.3, 51.7, 51.1, 38.9, 37.6, 34.9, 31.0, 30.9, 14.2. HRMS (ESI) calcd for C<sub>19</sub>H<sub>30</sub>NO<sub>3</sub> [M + H]<sup>+</sup> *m/z* = 320.2220, found: 320.2221. IR *v*<sub>max</sub>/cm<sup>-1</sup> (film): 2942, 2818, 1732, 1495, 1453, 1371, 1139, 1099, 1036, 946, 785, 745, 700.

#### ethyl 3-benzyl-4-(4-ethylpiperazin-1-yl)butanoate (29)

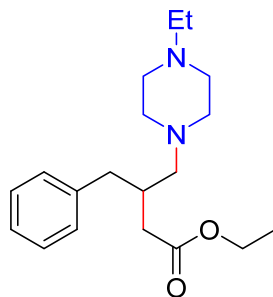

Prepared following the general procedure employing 1-ethylpiperazine (114 mg, 1 mmol), 3-phenylpropanal (201 mg, 1.5 mmol), ethyl 2-mercaptoacetate (180 mg, 1.5 mmol), triphenylphosphine (393 mg, 1.5 mmol), 4Å MS (1 g), di-tert-butyl peroxide (292 mg, 2 mmol) in anhydrous dichloromethane (6 mL). The desired product was obtained as colorless oil (245 mg, 77% yield) after purification by flash column chromatography on silica gel (0.5% Et<sub>3</sub>N in ethyl acetate: petroleum ether = 3:1).

<sup>1</sup>H NMR (400 MHz, CDCl<sub>3</sub>) δ 7.27 (t, *J* = 7.3 Hz, 2H), 7.21 - 7.14 (m, 3H), 4.11 - 4.01 (m, 2H), 2.72 (dd, *J* = 13.4, 5.7 Hz, 1H), 2.57 - 2.35 (m, 10H), 2.33 - 2.12 (m, 6H), 1.23 (t, *J* = 7.1 Hz, 3H), 1.07 (t, *J* = 7.2 Hz, 3H). <sup>13</sup>C NMR (101 MHz, CDCl<sub>3</sub>) δ 173.4, 139.8, 129.5, 128.3, 126.1, 62.6, 60.2, 53.5, 53.1, 52.5, 39.0, 37.7, 34.7, 14.4, 12.1. HRMS (ESI) calcd for C<sub>19</sub>H<sub>31</sub>N<sub>2</sub>O<sub>2</sub> [M + H]<sup>+</sup> *m/z* = 319.2380, found: 319.2385. IR *v*<sub>max</sub>/cm<sup>-1</sup> (film): 2935, 2808, 1732, 1452, 1376, 1300, 1165, 1038, 1014, 744, 701.

#### benzyl 4-(2-benzyl-4-ethoxy-4-oxobutyl)piperazine-1-carboxylate (30)

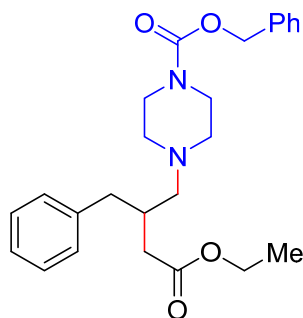

Prepared following the general procedure employing benzyl piperazine-1-carboxylate (220 mg, 1 mmol), 3-phenylpropanal (201 mg, 1.5 mmol), ethyl 2-mercaptoacetate (180 mg, 1.5 mmol), triphenylphosphine (393 mg, 1.5 mmol), 4Å MS (1 g), di-tert-butyl peroxide (292 mg, 2 mmol) in

anhydrous dichloromethane (6 mL). The desired product was obtained as colorless oil (361 mg, 85% yield) after purification by flash column chromatography on silica gel (0.5% Et<sub>3</sub>N in petroleum ether: ethyl acetate = 3:1).

<sup>1</sup>H NMR (400 MHz, CDCl<sub>3</sub>) δ 7.45 - 7.11 (m, 10H), 5.14 (s, 2H), 4.17 - 4.02 (m, 2H), 3.47 (br, 4H), 2.70 (dd, *J* = 13.5, 6.1 Hz, 1H), 2.58 (dd, *J* = 13.5, 7.2 Hz, 1H), 2.52 - 2.38 (m, 3H), 2.37 - 2.09 (m, 6H), 1.24 (t, *J* = 7.1 Hz, 3H). <sup>13</sup>C NMR (101 MHz, CDCl<sub>3</sub>) δ 173.1, 155.2, 139.6, 136.8, 129.3, 128.5, 128.4, 128.4, 128.3, 128.0, 127.8, 126.1, 67.0, 62.6, 60.2, 53.2, 43.9, 39.0, 37.7, 34.5, 14.3. HRMS (ESI) calcd for C<sub>25</sub>H<sub>33</sub>N<sub>2</sub>O<sub>4</sub> [M + H]<sup>+</sup> *m/z* = 425.2435, found: 425.2438. IR *v*<sub>max</sub>/cm<sup>-1</sup> (film): 2939, 1729, 1702, 1496, 1428, 1364, 1291, 1236, 1126, 1028, 1005, 746, 699.

#### ethyl 3-benzyl-4-thiomorpholinobutanoate (31)

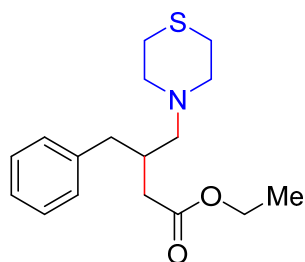

Prepared following the general procedure employing thiomorpholine (103 mg, 1 mmol), 3-phenylpropanal (201 mg, 1.5 mmol), ethyl 2-mercaptoacetate (180 mg, 1.5 mmol), triphenylphosphine (393 mg, 1.5 mmol), 4Å MS (1 g), di-tert-butyl peroxide (292 mg, 2 mmol) in anhydrous dichloromethane (6 mL). The desired product was obtained as colorless oil (230 mg, 75% yield) after purification by flash column chromatography on silica gel (0.5% Et<sub>3</sub>N in dichloromethane: methanol = 100:1).

<sup>1</sup>H NMR (400 MHz, CDCl<sub>3</sub>) δ 7.41 - 6.98 (m, 5H), 4.10 - 4.03 (m, 2H), 2.97 - 2.33 (m, 11H), 2.33 - 2.16 (m, 3H), 2.12 (dd, *J* = 12.6, 8.6 Hz, 1H), 1.22 (t, *J* = 7.1 Hz, 3H). <sup>13</sup>C NMR (101 MHz, CDCl<sub>3</sub>) δ 173.3, 139.8, 129.4, 128.4, 126.2, 63.4, 60.2, 55.6, 39.0, 37.8, 34.8, 28.1, 14.4. HRMS (ESI) calcd for C<sub>17</sub>H<sub>26</sub>NO<sub>2</sub>S [M + H]<sup>+</sup> *m/z* = 308.1679, found: 308.1682. IR *v*<sub>max</sub>/cm<sup>-1</sup> (film): 2928, 2806, 1731, 1453, 1372, 1281, 1150, 1124, 1030, 958, 745, 700.

#### ethyl 3-benzyl-4-morpholinobutanoate (32)

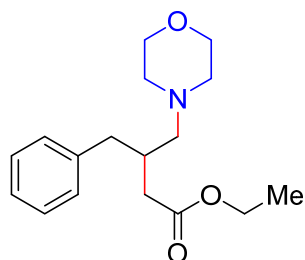

Prepared following the general procedure employing morpholine (87 mg, 1 mmol), 3-phenylpropanal (201 mg, 1.5 mmol), ethyl 2-mercaptoacetate (180 mg, 1.5 mmol), triphenylphosphine (393 mg, 1.5 mmol), 4Å MS (1 g), di-tert-butyl peroxide (292 mg, 2 mmol) in anhydrous dichloromethane (6 mL). The desired product was obtained as colorless oil (259 mg, 89% yield) after purification by flash column chromatography on silica gel (0.5% Et<sub>3</sub>N in dichloromethane: methanol = 50:1).

$^1\text{H}$  NMR (400 MHz,  $\text{CDCl}_3$ )  $\delta$  7.25 (t,  $J = 7.3$  Hz, 2H), 7.1 - 7.12 (m, 3H), 4.06 (qd,  $J = 6.8, 1.0$  Hz, 2H), 3.62 (t,  $J = 4.6$  Hz, 4H), 2.68 (dd,  $J = 13.5, 6.1$  Hz, 1H), 2.54 (dd,  $J = 13.5, 7.3$  Hz, 1H), 2.50 - 2.07 (m, 9H), 1.21 (t,  $J = 7.1$  Hz, 3H).  $^{13}\text{C}$  NMR (101 MHz,  $\text{CDCl}_3$ )  $\delta$  173.2, 139.7, 129.4, 128.3, 126.1, 67.1, 63.0, 60.2, 54.0, 39.0, 37.7, 34.3, 14.3. HRMS (ESI) calcd for  $\text{C}_{17}\text{H}_{26}\text{NO}_3$  [ $\text{M} + \text{H}$ ] $^+$   $m/z = 292.1907$ , found: 292.1911. IR  $\nu_{\text{max}}/\text{cm}^{-1}$  (film): 2956, 2854, 1731, 1454, 1372, 1201, 1144, 1118, 1034, 1010, 863, 746, 701.

**ethyl 3-benzyl-4-(4-hydroxypiperidin-1-yl)butanoate (33)**

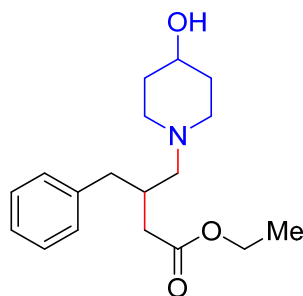

Prepared following the general procedure employing piperidin-4-ol (101 mg, 1 mmol), 3-phenylpropanal (201 mg, 1.5 mmol), ethyl 2-mercaptoacetate (180 mg, 1.5 mmol), triphenylphosphine (393 mg, 1.5 mmol), 4Å MS (1 g), di-tert-butyl peroxide (292 mg, 2 mmol) in anhydrous dichloromethane (6 mL). The desired product was obtained as colorless oil (258 mg, 85% yield) after purification by flash column chromatography on silica gel (0.5%  $\text{Et}_3\text{N}$  in petroleum: ethyl acetate = 1:1).

$^1\text{H}$  NMR (400 MHz,  $\text{CDCl}_3$ )  $\delta$  7.27 - 7.13 (m, 5H), 4.08 - 4.02 (m, 2H), 3.68 - 3.53 (m, 1H), 2.82 - 2.59 (m, 3H), 2.54 (dd,  $J = 13.6, 7.2$  Hz, 1H), 2.48 - 2.33 (m, 1H), 2.33 - 2.03 (m, 5H), 2.03 - 1.75 (m, 3H), 1.58 - 1.42 (m, 2H), 1.21 (t,  $J = 7.2$  Hz, 3H).  $^{13}\text{C}$  NMR (101 MHz,  $\text{CDCl}_3$ )  $\delta$  173.4, 140.0, 129.4, 128.4, 126.1, 68.3, 62.4, 60.2, 51.9, 51.3, 39.1, 37.8, 35.1, 34.7, 34.6, 14.4. HRMS (ESI) calcd for  $\text{C}_{18}\text{H}_{28}\text{NO}_3$  [ $\text{M} + \text{H}$ ] $^+$   $m/z = 306.2064$ , found: 306.2064. IR  $\nu_{\text{max}}/\text{cm}^{-1}$  (film): 3414, 2924, 2852, 1731, 1452, 1370, 1149, 1066, 1041, 744, 700.

**ethyl 3-benzyl-4-((4-methoxyphenyl)(methyl)amino)butanoate (34)**

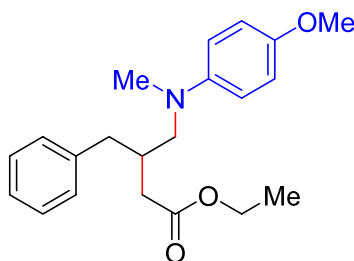

Prepared following the general procedure employing 4-methoxy-N-methylaniline (137 mg, 1 mmol), 3-phenylpropanal (201 mg, 1.5 mmol), ethyl 2-mercaptoacetate (180 mg, 1.5 mmol), triethyl phosphite (249 mg, 1.5 mmol), 4Å MS (1 g), di-tert-butyl peroxide (292 mg, 2 mmol) in anhydrous dichloromethane (6 mL). The desired product was obtained as pink oil (256 mg, 75% yield) after purification by flash column chromatography on silica gel (0.5%  $\text{Et}_3\text{N}$  in petroleum ether: ethyl acetate = 15:1).



$^1\text{H}$  NMR (400 MHz,  $\text{CDCl}_3$ )  $\delta$  7.31 - 7.12 (m, 5H), 6.79 (d,  $J = 9.1$  Hz, 2H), 6.64 (d,  $J = 9.1$  Hz, 2H), 4.08 - 3.94 (m, 2H), 3.74 (s, 3H), 3.18 - 3.03 (m, 2H), 2.82 (s, 3H), 2.74 (dd,  $J = 12.2, 5.1$  Hz, 1H), 2.66 - 2.49 (m, 2H), 2.28 (d,  $J = 6.3$  Hz, 2H), 1.16 (t,  $J = 7.1$  Hz, 3H).  $^{13}\text{C}$  NMR (101 MHz,  $\text{CDCl}_3$ )  $\delta$  173.0, 151.9, 145.1, 139.9, 129.4, 128.5, 126.3, 114.8, 60.4, 58.5, 56.0, 40.2, 38.9, 37.0, 36.6, 14.3. HRMS (ESI) calcd for  $\text{C}_{21}\text{H}_{28}\text{NO}_3$   $[\text{M} + \text{H}]^+$   $m/z = 342.2064$ , found: 342.2063. IR  $\nu_{\text{max}}/\text{cm}^{-1}$  (film): 2964, 1734, 1512, 1438, 1258, 1036, 912, 800, 742, 701.

**ethyl 3-benzyl-4-(methyl(p-tolyl)amino)butanoate (35)**

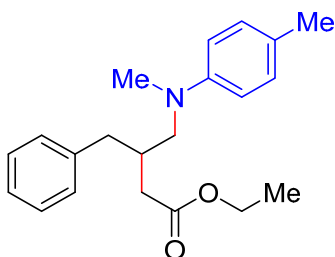

Prepared following the general procedure employing N,4-dimethylaniline (121mg, 1 mmol), 3-phenylpropanal (201 mg, 1.5 mmol), ethyl 2-mercaptoacetate (180 mg, 1.5 mmol), triethyl phosphite (249 mg, 1.5 mmol), 4Å MS (1 g), di-tert-butyl peroxide (292 mg, 2 mmol) in anhydrous dichloromethane (6 mL). The desired product was obtained as pink oil (234 mg, 72% yield) after purification by flash column chromatography on silica gel (0.5%  $\text{Et}_3\text{N}$  in petroleum ether: ethyl acetate = 40:1).

$^1\text{H}$  NMR (400 MHz,  $\text{CDCl}_3$ )  $\delta$  7.35 - 7.13 (m, 5H), 7.01 (d,  $J = 8.3$  Hz, 2H), 6.59 (d,  $J = 8.6$  Hz, 2H), 4.08 - 3.96 (m, 2H), 3.28 - 3.13 (m, 2H), 2.88 (s, 3H), 2.75 (dd,  $J = 12.4, 5.5$  Hz, 1H), 2.70 - 2.53 (m, 2H), 2.29 (d,  $J = 6.3$  Hz, 2H), 2.24 (s, 3H), 1.18 (t,  $J = 7.1$  Hz, 3H).  $^{13}\text{C}$  NMR (101 MHz,  $\text{CDCl}_3$ )  $\delta$  172.9, 148.0, 139.9, 129.7, 129.3, 128.5, 126.3, 125.8, 112.9, 60.4, 57.6, 39.7, 38.8, 36.9, 36.7, 20.3, 14.3. HRMS (ESI) calcd for  $\text{C}_{21}\text{H}_{28}\text{NO}_2$   $[\text{M} + \text{H}]^+$   $m/z = 326.2115$ , found: 326.2117. IR  $\nu_{\text{max}}/\text{cm}^{-1}$  (film): 2978, 1734, 1617, 1521, 1451, 1370, 1150, 1029, 801, 743, 700.

**ethyl 3-benzyl-4-(6-methoxy-3,4-dihydroquinolin-1(2H)-yl)butanoate (36)**

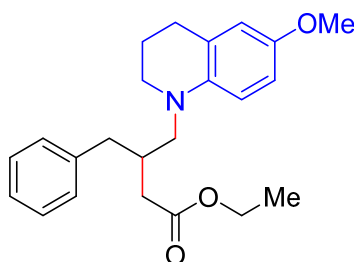

Prepared following the general procedure employing 6-methoxy-1, 2, 3, 4-tetrahydroquinoline (163 mg, 1 mmol), 3-phenylpropanal (201 mg, 1.5 mmol), ethyl 2-mercaptoacetate (180 mg, 1.5 mmol), triethyl phosphite (249 mg, 1.5 mmol), 4Å MS (1 g), di-tert-butyl peroxide (292 mg, 2 mmol) in anhydrous dichloromethane (6 mL). The desired product was obtained as pink oil (146.8 mg, 40% yield) after purification by flash column chromatography on silica gel (0.5%  $\text{Et}_3\text{N}$  in petroleum ether: ethyl acetate = 40:1).

$^1\text{H}$  NMR (400 MHz,  $\text{CDCl}_3$ )  $\delta$  7.29 - 7.15 (m, 5H), 6.63 - 6.51 (m, 2H), 6.44 (d,  $J = 8.8$  Hz, 1H), 4.01 (qd,  $J = 7.1, 1.0$  Hz, 2H), 3.70 (s, 3H), 3.23 - 3.01 (m, 4H), 2.81 - 2.48 (m, 5H), 2.28 (d,  $J =$

6.4 Hz, 2H), 1.94 - 1.83 (m, 2H), 1.16 (t,  $J = 7.1$  Hz, 3H).  $^{13}\text{C}$  NMR (101 MHz,  $\text{CDCl}_3$ )  $\delta$  173.0, 151.0, 140.8, 140.0, 129.4, 128.5, 126.3, 124.2, 115.4, 112.6, 112.5, 60.4, 57.2, 56.0, 50.9, 38.9, 37.0, 36.6, 28.4, 22.4, 14.3. HRMS (ESI) calcd for  $\text{C}_{23}\text{H}_{30}\text{NO}_3$   $[\text{M} + \text{H}]^+$   $m/z = 368.2220$ , found: 368.2224. IR  $\nu_{\text{max}}/\text{cm}^{-1}$  (film): 2944, 1734, 1495, 1451, 1370, 1151, 1029, 742, 700.

#### ethyl 4-(benzyl(methyl)amino) butanoate (37)

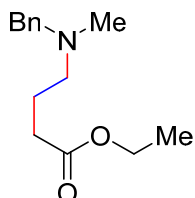

Prepared following the general procedure employing N-methyl-1-phenylmethanamine (121 mg, 1 mmol), acetaldehyde (5 mol/L in THF) (0.4 ml, 2 mmol), ethyl 2-mercaptoacetate (180 mg, 1.5 mmol), triphenylphosphine (393 mg, 1.5 mmol), Potassium carbonate (276 mg, 2 mmol), di-tert-butyl peroxide (292 mg, 2 mmol) in anhydrous THF (6 mL). The desired product was obtained as colorless oil (211 mg, 90% yield) after purification by flash column chromatography on silica gel (0.5%  $\text{Et}_3\text{N}$  in dichloromethane).

$^1\text{H}$  NMR (400 MHz,  $\text{CDCl}_3$ )  $\delta$  7.37 - 7.12 (m, 5H), 4.09 (q,  $J = 7.1$  Hz, 2H), 3.45 (s, 2H), 2.37 (t,  $J = 7.3$  Hz, 2H), 2.33 (t,  $J = 7.3$  Hz, 2H), 2.16 (s, 3H), 1.81 (p,  $J = 7.3$  Hz, 2H), 1.22 (t,  $J = 7.1$  Hz, 3H).  $^{13}\text{C}$  NMR (101 MHz,  $\text{CDCl}_3$ )  $\delta$  173.7, 139.3, 129.0, 128.2, 126.9, 62.4, 60.2, 56.4, 42.0, 32.1, 22.7, 14.3. HRMS (ESI) calcd for  $\text{C}_{14}\text{H}_{22}\text{NO}_2$   $[\text{M} + \text{H}]^+$   $m/z = 236.1645$ , found: 236.1646. IR  $\nu_{\text{max}}/\text{cm}^{-1}$  (film): 2978, 2790, 1735, 1452, 1370, 1251, 1174, 1122, 1026, 737, 699.

#### ethyl 3-((benzyl(methyl)amino)methyl)pentanoate (38)

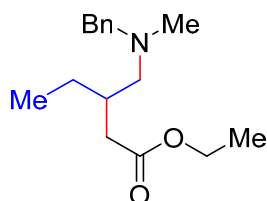

Prepared following the general procedure employing N-methyl-1-phenylmethanamine (121 mg, 1 mmol), butyraldehyde (110 mg, 1.5 mmol), ethyl 2-mercaptoacetate (180 mg, 1.5 mmol), triphenylphosphine (393 mg, 1.5 mmol), 4Å MS (1 g), di-tert-butyl peroxide (292 mg, 2 mmol) in anhydrous dichloromethane (6 mL). The desired product was obtained as colorless oil (239 mg, 91% yield) after purification by flash column chromatography on silica gel (0.5%  $\text{Et}_3\text{N}$  in dichloromethane).

$^1\text{H}$  NMR (400 MHz,  $\text{CDCl}_3$ )  $\delta$  7.39 - 6.96 (m, 5H), 4.11 (q,  $J = 7.2$  Hz, 2H), 3.45 (dd,  $J = 28.7, 13.1$  Hz, 2H), 2.42 (dd,  $J = 15.0, 6.0$  Hz, 1H), 2.28 - 2.00 (m, 7H), 1.47 - 1.28 (m, 2H), 1.24 (t,  $J = 7.1$  Hz, 3H), 0.87 (t,  $J = 7.5$  Hz, 3H).  $^{13}\text{C}$  NMR (101 MHz,  $\text{CDCl}_3$ )  $\delta$  173.8, 139.6, 129.0, 128.2, 126.9, 63.1, 61.8, 60.1, 42.5, 37.7, 35.0, 25.5, 14.4, 11.0. HRMS (ESI) calcd for  $\text{C}_{16}\text{H}_{26}\text{NO}_2$   $[\text{M} + \text{H}]^+$   $m/z = 264.1958$ , found: 264.1960. IR  $\nu_{\text{max}}/\text{cm}^{-1}$  (film): 2961, 2788, 1734, 1453, 1371, 1249, 1173, 1036, 740, 699.

#### ethyl 3-((benzyl(methyl)amino)methyl)-4-methylpentanoate (39)

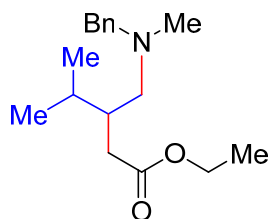

Prepared following the general procedure employing N-methyl-1-phenylmethanamine (121mg, 1 mmol), 3-methylbutanal (129 mg, 1.5 mmol), ethyl 2-mercaptoacetate (180 mg, 1.5 mmol), triphenylphosphine (393 mg, 1.5 mmol), 4Å MS (1 g), di-tert-butyl peroxide (292 mg, 2 mmol) in anhydrous dichloromethane (6 mL). The desired product was obtained as colorless oil (246 mg, 89% yield) after purification by flash column chromatography on silica gel (0.5% Et<sub>3</sub>N in dichloromethane).

<sup>1</sup>H NMR (400 MHz, CDCl<sub>3</sub>) δ 7.36 - 7.11 (m, 5H), 4.11 (q, *J* = 7.1 Hz, 2H), 3.45 (q, *J* = 13.1 Hz, 2H), 2.37 - 2.16 (m, 5H), 2.13 (s, 3H), 1.89 - 1.74 (m, 1H), 1.25 (t, *J* = 7.1 Hz, 3H), 0.87 (d, *J* = 6.9 Hz, 3H), 0.80 (d, *J* = 6.9 Hz, 3H). <sup>13</sup>C NMR (101 MHz, CDCl<sub>3</sub>) δ 174.2, 139.6, 129.1, 128.1, 126.9, 63.2, 60.1, 59.8, 42.5, 39.0, 35.0, 29.1, 19.8, 18.5, 14.3. HRMS (ESI) calcd for C<sub>17</sub>H<sub>28</sub>O<sub>2</sub> [M + H]<sup>+</sup> *m/z* = 278.2115, found: 278.2116. IR *v*<sub>max</sub>/cm<sup>-1</sup> (film): 2958, 1734, 1453, 1370, 1266, 1171, 1128, 1035, 740, 699.

#### ethyl 3-((benzyl(methyl)amino)methyl)-4,4-dimethylpentanoate (40)

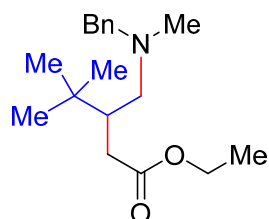

Prepared following the general procedure employing N-methyl-1-phenylmethanamine (121mg, 1 mmol), 3, 3-dimethylbutanal (150 mg, 1.5 mmol), ethyl 2-mercaptoacetate (180 mg, 1.5 mmol), triphenylphosphine (393 mg, 1.5 mmol), 4Å MS (1 g), di-tert-butyl peroxide (292 mg, 2 mmol) in anhydrous dichloromethane (6 mL). The desired product was obtained as colorless oil (247 mg, 85% yield) after purification by flash column chromatography on silica gel (0.5% Et<sub>3</sub>N in dichloromethane).

<sup>1</sup>H NMR (400 MHz, CDCl<sub>3</sub>) δ 7.36 - 7.11 (m, 5H), 4.09 (q, *J* = 7.1 Hz, 2H), 3.57 (d, *J* = 13.0 Hz, 1H), 3.31 (d, *J* = 13.0 Hz, 1H), 2.40 (dd, *J* = 15.5, 6.3 Hz, 1H), 2.34 - 2.04 (m, 7H), 1.24 (t, *J* = 7.2 Hz, 3H), 0.86 (s, 9H). <sup>13</sup>C NMR (101 MHz, CDCl<sub>3</sub>) δ 174.8, 139.6, 129.3, 128.1, 126.9, 63.3, 60.2, 59.3, 43.0, 42.4, 35.4, 32.6, 27.7, 14.3. HRMS (ESI) calcd for C<sub>18</sub>H<sub>30</sub>NO<sub>2</sub> [M + H]<sup>+</sup> *m/z* = 292.2271, found: 292.2274. IR *v*<sub>max</sub>/cm<sup>-1</sup> (film): 2961, 1733, 1453, 1367, 1255, 1201, 1157, 1034, 739, 699.

#### ethyl 3-((benzyl(methyl)amino)methyl)decanoate (41)

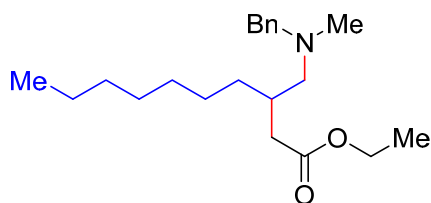

Prepared following the general procedure employing N-methyl-1-phenylmethanamine (121mg, 1 mmol), nonanal (214 mg, 1.5 mmol), ethyl 2-mercaptoacetate (180 mg, 1.5 mmol), triphenylphosphine (393 mg, 1.5 mmol), 4Å MS (1 g), di-tert-butyl peroxide (292 mg, 2 mmol) in anhydrous dichloromethane (6 mL). The desired product was obtained as colorless oil (276 mg, 83% yield) after purification by flash column chromatography on silica gel (0.5% Et<sub>3</sub>N in dichloromethane).

<sup>1</sup>H NMR (400 MHz, CDCl<sub>3</sub>) δ 7.36 - 7.12 (m, 5H), 4.10 (q, *J* = 7.1 Hz, 2H), 3.48 (d, *J* = 13.1 Hz, 1H), 3.41 (d, *J* = 13.1 Hz, 1H), 2.49 - 2.37 (m, 1H), 2.29 - 2.04 (m, 7H), 1.47 - 1.07 (m, 15H), 0.87 (t, *J* = 6.8 Hz, 3H). <sup>13</sup>C NMR (101 MHz, CDCl<sub>3</sub>) δ 173.7, 139.4, 128.9, 128.0, 126.8, 63.0, 62.1, 60.0, 42.4, 38.1, 33.6, 32.9, 31.8, 29.9, 29.2, 26.6, 22.6, 14.2, 14.1. HRMS (ESI) calcd for C<sub>21</sub>H<sub>36</sub>NO<sub>2</sub> [M + H]<sup>+</sup> *m/z* = 334.2741, found: 334.2745. IR *v*<sub>max</sub>/cm<sup>-1</sup> (film): 2927, 2854, 1734, 1453, 1251, 1162, 1027, 740, 699.

#### ethyl 3-((benzyl(methyl)amino)methyl)-4,8-dimethylnon-7-enoate (42)

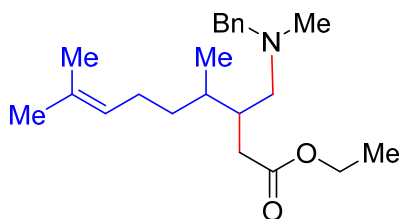

Prepared following the general procedure employing N-methyl-1-phenylmethanamine (121mg, 1 mmol), 3, 7-dimethyloct-6-enal (232 mg, 1.5 mmol), ethyl 2-mercaptoacetate (180 mg, 1.5 mmol), triphenylphosphine (393 mg, 1.5 mmol), 4Å MS (1 g), di-tert-butyl peroxide (292 mg, 2 mmol) in anhydrous dichloromethane (6 mL). The desired product was obtained as colorless oil (297 mg, 86% yield) after purification by flash column chromatography on silica gel (0.5% Et<sub>3</sub>N in petroleum ether: ethyl acetate = 4:1). The dr value (2:1) was based on <sup>1</sup>H NMR spectra.

<sup>1</sup>H NMR (400 MHz, CDCl<sub>3</sub>) δ 7.39 - 7.14 (m, 5H), 5.14 - 4.97 (m, 1H), 4.10 (q, *J* = 7.1 Hz, 2H), 3.57 - 3.29 (m, 2H), 2.46 - 2.33 (m, 1H), 2.31 - 2.15 (m, 4H), 2.12 (s, 3H), 2.06 - 1.84 (m, 2H), 1.67 (s, 3H), 1.59 (s, 3H), 1.35 - 1.26 (m, 1H), 1.26 - 1.21 (m, 3H), 1.19 - 1.02 (m, 1H), 0.90 - 0.83 (m, 1H), 0.82 (d, *J* = 6.9 Hz, 2H, major diastereomer), 0.74 (d, *J* = 6.9 Hz, 1H, minor diastereomer). <sup>13</sup>C NMR (101 MHz, CDCl<sub>3</sub>, double carbon signals) δ 174.2, 174.1, 139.6, 139.6, 131.4, 131.3, 129.1, 129.1, 128.2, 128.2, 126.9, 126.9, 124.8, 124.8, 63.3, 63.1, 60.3, 60.1, 58.8, 58.7, 42.5, 42.5, 38.0, 37.4, 36.0, 34.6, 34.4, 34.0, 33.7, 33.3, 26.3, 26.1, 25.8, 17.8, 17.8, 16.0, 15.9, 15.2, 14.4, 14.3. HRMS (ESI) calcd for C<sub>22</sub>H<sub>36</sub>NO<sub>2</sub> [M + H]<sup>+</sup> *m/z* = 346.2741, found: 346.2741. IR *v*<sub>max</sub>/cm<sup>-1</sup> (film): 2961, 1734, 1452, 1374, 1270, 1171, 1035, 740, 699.

#### ethyl 3-phenyl-4-(pyrrolidin-1-yl)butanoate (43)

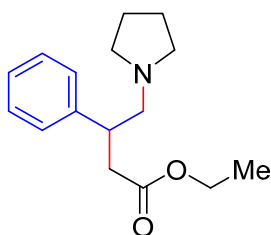

Prepared following the general procedure employing pyrrolidine (72 mg, 1 mmol), 2-phenylacetaldehyde (180 mg, 1.5 mmol), ethyl 2-mercaptoacetate (180 mg, 1.5 mmol), triphenylphosphine (393 mg, 1.5 mmol), 4Å MS (1 g), di-tert-butyl peroxide (292 mg, 2 mmol) in anhydrous dichloromethane (6 mL). The desired product was obtained as colorless oil (219 mg, 84% yield) after purification by flash column chromatography on silica gel (0.5% Et<sub>3</sub>N in ethyl acetate).

<sup>1</sup>H NMR (400 MHz, CDCl<sub>3</sub>) δ 7.36 - 7.05 (m, 5H), 4.02 - 3.95 (m, 2H), 3.39 - 3.24 (m, 1H), 2.85 (dd, *J* = 15.2, 6.2 Hz, 1H), 2.76 (dd, *J* = 12.0, 9.7 Hz, 1H), 2.62 - 2.34 (m, 6H), 1.82 - 1.59 (m, 4H), 1.11 (t, *J* = 7.1 Hz, 3H). <sup>13</sup>C NMR (101 MHz, CDCl<sub>3</sub>) δ 172.8, 143.2, 128.5, 127.6, 126.7, 62.5, 60.2, 54.3, 41.8, 39.7, 23.7, 14.2. HRMS (ESI) calcd for C<sub>16</sub>H<sub>24</sub>NO<sub>2</sub> [M + H]<sup>+</sup> *m/z* = 262.1802, found: 262.1805. IR *v*<sub>max</sub>/cm<sup>-1</sup> (film): 2964, 1732, 1453, 1371, 1253, 1160, 1120, 1030, 761, 700.

#### ethyl 4-(benzyl(methyl)amino)-3-((methylthio)methyl)butanoate (44)

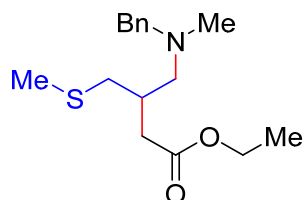

Prepared following the general procedure employing N-methyl-1-phenylmethanamine (121 mg, 1 mmol), 3-(methylthio)propanal (157 mg, 1.5 mmol), ethyl 2-mercaptoacetate (180 mg, 1.5 mmol), triphenylphosphine (393 mg, 1.5 mmol), 4Å MS (1 g), di-tert-butyl peroxide (292 mg, 2 mmol) in anhydrous dichloromethane (6 mL). The desired product was obtained as colorless oil (266 mg, 90% yield) after purification by flash column chromatography on silica gel (0.5% Et<sub>3</sub>N in dichloromethane).

<sup>1</sup>H NMR (400 MHz, CDCl<sub>3</sub>) δ 7.38 - 7.00 (m, 5H), 4.11 (q, *J* = 7.1 Hz, 2H), 3.46 (s, 2H), 2.64 (dd, *J* = 13.1, 4.6 Hz, 1H), 2.49 - 2.18 (m, 6H), 2.15 (s, 3H), 2.07 (s, 3H), 1.24 (t, *J* = 7.1 Hz, 3H). <sup>13</sup>C NMR (101 MHz, CDCl<sub>3</sub>) δ 173.1, 139.3, 129.0, 128.2, 127.0, 63.0, 61.1, 60.3, 42.5, 37.6, 37.0, 33.6, 16.4, 14.3. HRMS (ESI) calcd for C<sub>16</sub>H<sub>26</sub>NO<sub>2</sub>S [M + H]<sup>+</sup> *m/z* = 296.1679, found: 296.1680. IR *v*<sub>max</sub>/cm<sup>-1</sup> (film): 2978, 2915, 2790, 1732, 1452, 1372, 1253, 1153, 1024, 740, 699.

#### ethyl 4-(benzyl(methyl)amino)-3-(benzyloxy)butanoate (45)

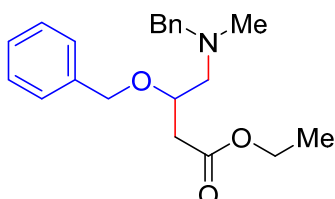

Prepared following the general procedure employing N-methyl-1-phenylmethanamine (121 mg, 1 mmol), 2-(benzyloxy) acetaldehyde (225 mg, 1.5 mmol), ethyl 2-mercaptoacetate (180 mg, 1.5

mmol), triphenylphosphine (393 mg, 1.5 mmol), 4Å MS (1 g), di-tert-butyl peroxide (292 mg, 2 mmol) in anhydrous dichloromethane (6 mL). The desired product was obtained as colorless oil (259 mg, 76% yield) after purification by flash column chromatography on silica gel (0.5% Et<sub>3</sub>N in petroleum ether: ethyl acetate = 8:1).

<sup>1</sup>H NMR (400 MHz, CDCl<sub>3</sub>) δ 7.37 - 7.25 (m, 10H), 4.60 (dd, *J* = 25.1, 11.4 Hz, 2H), 4.17 - 3.98 (m, 3H), 3.56 - 3.46 (m, 2H), 2.70 (dd, *J* = 15.5, 4.8 Hz, 1H), 2.59 (dd, *J* = 12.8, 5.5 Hz, 1H), 2.54 - 2.43 (m, 2H), 2.21 (s, 3H), 1.22 (t, *J* = 7.1 Hz, 3H). <sup>13</sup>C NMR (101 MHz, CDCl<sub>3</sub>) δ 172.2, 164.4, 139.1, 138.7, 129.1, 128.4, 128.3, 127.9, 127.7, 127.1, 74.8, 72.3, 63.3, 60.8, 60.5, 43.2, 39.2, 14.4. HRMS (ESI) calcd for C<sub>21</sub>H<sub>28</sub>NO<sub>3</sub> [M + H]<sup>+</sup> *m/z* = 342.2064, found: 342.2068. IR ν<sub>max</sub>/cm<sup>-1</sup> (film): 2935, 1734, 1452, 1324, 1256, 1172, 1098, 1027, 740, 698.

#### ethyl 3-((benzyl(methyl)amino)methyl)-6-chlorohexanoate (46)

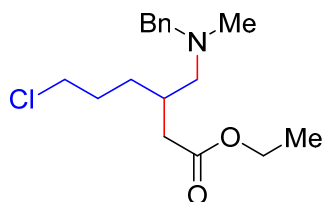

Prepared following the general procedure employing N-methyl-1-phenylmethanamine (121mg, 1 mmol), 5-chloropentanal (180 mg, 1.5 mmol), ethyl 2-mercaptoacetate (180 mg, 1.5 mmol), triphenylphosphine (393 mg, 1.5 mmol), 4Å MS (1 g), di-tert-butyl peroxide (292 mg, 2 mmol) in anhydrous dichloromethane (6 mL). The desired product was obtained as colorless oil (267 mg, 86% yield) after purification by flash column chromatography on silica gel (0.5% Et<sub>3</sub>N in dichloromethane).

<sup>1</sup>H NMR (400 MHz, CDCl<sub>3</sub>) δ 7.40 - 7.10 (m, 5H), 4.10 (q, *J* = 7.2 Hz, 2H), 3.60 - 3.33 (m, 4H), 2.49 - 2.06 (m, 8H), 1.83 - 1.68 (m, 2H), 1.54 - 1.36 (m, 2H), 1.24 (t, *J* = 7.2 Hz, 3H). <sup>13</sup>C NMR (101 MHz, CDCl<sub>3</sub>) δ 171.3, 133.8, 130.7, 129.2, 127.0, 63.4, 61.1, 59.8, 44.3, 37.7, 28.4, 27.6, 20.5, 14.3, 14.3. HRMS (ESI) calcd for C<sub>17</sub>H<sub>27</sub>ClNO<sub>2</sub> [M + H]<sup>+</sup> *m/z* = 312.1725, found: 312.1731. IR ν<sub>max</sub>/cm<sup>-1</sup> (film): 2927, 1727, 1458, 1286, 1254, 1189, 1030, 765, 703.

#### ethyl 2-(2-(pyrrolidin-1-yl)cyclopentyl)acetate (47)

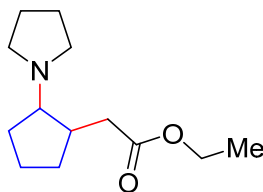

Prepared following the general procedure employing pyrrolidine (72 mg, 1 mmol), cyclopentanone (126 mg, 1.5 mmol), ethyl 2-mercaptoacetate (180 mg, 1.5 mmol), triphenylphosphine (393 mg, 1.5 mmol), 4Å MS (1 g), di-tert-butyl peroxide (292 mg, 2 mmol) in anhydrous dichloromethane (6 mL). The desired product was obtained as colorless oil (153 mg, 68% yield) after purification by flash column chromatography on silica gel (0.5% Et<sub>3</sub>N in ethyl acetate). The dr value (1.3:1) was based on HPLC spectra.

<sup>1</sup>H NMR (400 MHz, CDCl<sub>3</sub>) δ 4.12 (q, *J* = 7.2 Hz, 2H), 2.69 - 2.25 (m, 7H), 2.25 - 1.89 (m, 2H), 1.89 - 1.41 (m, 9H), 1.25 (td, *J* = 7.2, 1.5 Hz, 3H). <sup>13</sup>C NMR (101 MHz, CDCl<sub>3</sub>, double carbon signals) δ 174.4, 173.1, 70.9, 69.8, 60.2, 60.1, 53.8, 52.2, 40.2, 39.1, 33.2, 33.2, 31.7, 30.9, 28.8,

28.7, 23.8, 23.4, 23.4, 20.4, 14.4, 14.3. HRMS (ESI) calcd for  $C_{13}H_{24}NO_2$   $[M + H]^+$   $m/z = 226.1802$ , found: 226.1802. IR  $\nu_{max}/cm^{-1}$  (film): 2959, 2873, 2780, 1734, 1371, 1345, 1255, 1177, 1034.

**ethyl 2-(2-(pyrrolidin-1-yl)cyclohexyl)acetate (48)**

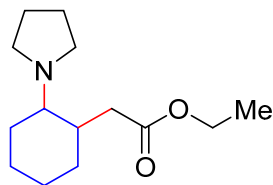

Prepared following the general procedure employing pyrrolidine (72 mg, 1 mmol), cyclohexanone (147 mg, 1.5 mmol), ethyl 2-mercaptoacetate (180 mg, 1.5 mmol), triphenylphosphine (393 mg, 1.5 mmol), 4Å MS (1 g), di-tert-butyl peroxide (292 mg, 2 mmol) in anhydrous dichloromethane (6 mL). The desired product was obtained as colorless oil (170 mg, 71% yield) after purification by flash column chromatography on silica gel (0.5%  $Et_3N$  in dichloromethane: methanol = 30:1). The dr value (4:1) was based on HPLC spectra.

$^1H$  NMR (400 MHz,  $CDCl_3$ )  $\delta$  4.04 (q,  $J = 7.1$  Hz, 2H), 2.82 - 2.50 (m, 5H), 2.45 (d,  $J = 11.2$  Hz, 1H), 2.33 (dd,  $J = 15.2, 11.4$  Hz, 1H), 2.13 (dd,  $J = 8.0, 3.7$  Hz, 1H), 1.85 - 1.49 (m, 7H), 1.42 - 1.10 (m, 5H), 1.17 (t,  $J = 7.1$  Hz, 3H).  $^{13}C$  NMR (101 MHz,  $CDCl_3$ , double carbon signals)  $\delta$  174.1, 173.7, 67.2, 63.1, 60.2, 59.9, 52.0, 47.8, 39.2, 38.2, 33.9, 32.0, 30.8, 30.2, 28.6, 26.5, 25.3, 25.2, 25.1, 23.8, 23.2, 23.1, 19.7, 14.3. HRMS (ESI) calcd for  $C_{14}H_{26}NO_2$   $[M + H]^+$   $m/z = 240.1958$ , found: 240.1956. IR  $\nu_{max}/cm^{-1}$  (film): 2931, 2862, 1732, 1451, 1367, 1284, 1173, 1033. The dr value (1:1.3) was based on HPLC spectra.

**ethyl 2-(2-(pyrrolidin-1-yl)cycloheptyl)acetate (49)**

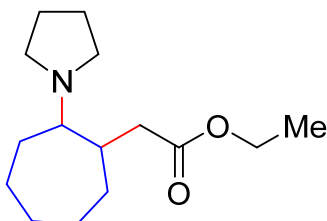

Prepared following the general procedure employing pyrrolidine (72 mg, 1 mmol), cycloheptanone (168 mg, 1.5 mmol), ethyl 2-mercaptoacetate (180 mg, 1.5 mmol), triphenylphosphine (393 mg, 1.5 mmol), 4Å MS (1 g), di-tert-butyl peroxide (292 mg, 2 mmol) in anhydrous dichloromethane (6 mL). The desired product was obtained as colorless oil (187 mg, 74% yield) after purification by flash column chromatography on silica gel (0.5%  $Et_3N$  in dichloromethane: methanol = 30:1). The dr value (6:1) was based on HPLC spectra.

$^1H$  NMR (400 MHz,  $CDCl_3$ )  $\delta$  4.04 (qd,  $J = 7.1, 1.0$  Hz, 2H), 2.67 - 2.50 (m, 3H), 2.43 (d,  $J = 7.0$  Hz, 2H), 2.37 - 2.26 (m, 1H), 2.19 - 2.06 (m, 2H), 1.77 - 1.28 (m, 14H), 1.22 (t,  $J = 7.1$  Hz, 3H).  $^{13}C$  NMR (101 MHz,  $CDCl_3$ )  $\delta$  174.0, 65.8, 60.0, 48.1, 41.0, 40.0, 31.4, 29.6, 26.0, 25.0, 24.9, 23.9, 14.4. HRMS (ESI) calcd for  $C_{15}H_{28}NO_2$   $[M + H]^+$   $m/z = 254.2115$ , found: 254.2119. IR  $\nu_{max}/cm^{-1}$  (film): 2927, 1731, 1451, 1369, 1267, 1183, 1153, 1028. The dr value (1:6) was based on HPLC spectra.

**ethyl 2-(5-phenyl-2-(pyrrolidin-1-yl)cyclohexyl)acetate (50)**

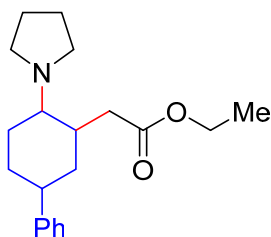

Prepared following the general procedure employing pyrrolidine (72 mg, 1 mmol), 4-phenylcyclohexan-1-one (261 mg, 1.5 mmol), ethyl 2-mercaptoacetate (180 mg, 1.5 mmol), triphenylphosphine (393 mg, 1.5 mmol), 4Å MS (1 g), di-tert-butyl peroxide (292 mg, 2 mmol) in anhydrous dichloromethane (6 mL). The desired product was obtained as colorless oil (227 mg, 72% yield) after purification by flash column chromatography on silica gel (0.5% Et<sub>3</sub>N in dichloromethane: methanol = 30:1). The dr value (5:1) was based on HPLC spectra.

<sup>1</sup>H NMR (400 MHz, CDCl<sub>3</sub>) δ 7.52 - 6.89 (m, 5H), 4.11 (q, *J* = 7.2 Hz, 2H), 2.90 - 2.23 (m, 8H), 2.21 - 1.58 (m, 9H), 1.58 - 1.35 (m, 2H), 1.23 (t, *J* = 7.2 Hz, 3H). <sup>13</sup>C NMR (101 MHz, CDCl<sub>3</sub>) δ 174.1, 146.4, 128.4, 126.9, 126.2, 66.6, 60.3, 52.1, 37.3, 36.4, 34.8, 32.9, 31.6, 27.1, 24.0, 23.6, 23.3, 14.4. HRMS (ESI) calcd for C<sub>20</sub>H<sub>30</sub>NO<sub>2</sub> [M + H]<sup>+</sup> *m/z* = 316.2271, found: 316.2282. IR *v*<sub>max</sub>/cm<sup>-1</sup> (film): 2929, 1731, 1451, 1369, 1283, 1155, 1031, 756, 699.

#### ethyl 2-(1-benzyl-4-(pyrrolidin-1-yl)piperidin-3-yl)acetate (51)

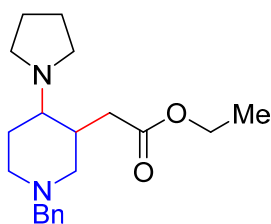

Prepared following the general procedure employing pyrrolidine (72 mg, 1 mmol), 1-benzylpiperidin-4-one (284 mg, 1.5 mmol), ethyl 2-mercaptoacetate (180 mg, 1.5 mmol), triphenylphosphine (393 mg, 1.5 mmol), 4Å MS (1 g), di-tert-butyl peroxide (292 mg, 2 mmol) in anhydrous dichloromethane (6 mL). The desired product was obtained as colorless oil (231 mg, 70% yield) after purification by flash column chromatography on silica gel (0.5% Et<sub>3</sub>N in dichloromethane: methanol = 15:1). The dr value (7:1) was based on HPLC spectra.

<sup>1</sup>H NMR (400 MHz, CDCl<sub>3</sub>) δ 7.38 - 7.07 (m, 5H), 4.10 - 3.91 (m, 2H), 3.41 (dd, *J* = 53.9, 13.4 Hz, 2H), 2.88 - 2.60 (m, 4H), 2.60 - 2.38 (m, 4H), 2.38 - 2.26 (m, 1H), 2.07 - 1.87 (m, 3H), 1.85 - 1.69 (m, 4H), 1.69 - 1.49 (m, 2H), 1.17 (t, *J* = 7.1 Hz, 3H). <sup>13</sup>C NMR (101 MHz, CDCl<sub>3</sub>) δ 174.6, 139.0, 128.8, 128.2, 126.9, 65.5, 62.7, 60.1, 56.0, 53.2, 51.9, 35.0, 30.8, 27.7, 23.3, 14.4. HRMS (ESI) calcd for C<sub>20</sub>H<sub>31</sub>N<sub>2</sub>O<sub>2</sub> [M + H]<sup>+</sup> *m/z* = 331.2380, found: 331.2383. IR *v*<sub>max</sub>/cm<sup>-1</sup> (film): 2945, 2774, 1729, 1452, 1367, 1289, 1167, 1123, 1035, 890, 739, 698.

#### ethyl 2-(1-benzyl-5-methyl-4-(pyrrolidin-1-yl)piperidin-3-yl)acetate (52)



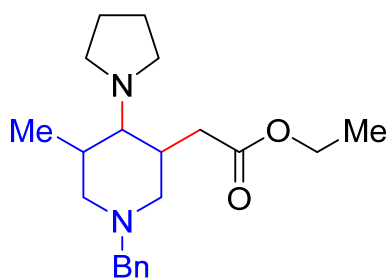

Prepared following the general procedure employing pyrrolidine (72 mg, 1 mmol), 1-benzyl-3-methylpiperidin-4-one (305 mg, 1.5 mmol), ethyl 2-mercaptoacetate (180 mg, 1.5 mmol), triphenylphosphine (393 mg, 1.5 mmol), 4Å MS (1 g), di-tert-butyl peroxide (292 mg, 2 mmol) in anhydrous dichloromethane (6 mL). The desired product was obtained as colorless oil (99 mg, 29% yield) after purification by flash column chromatography on silica gel (0.5% Et<sub>3</sub>N in dichloromethane: methanol = 20:1).

<sup>1</sup>H NMR (400 MHz, CDCl<sub>3</sub>) δ 7.37 – 7.26 (m, 4H), 7.21 (t, *J* = 7.1 Hz, 1H), 4.04 (qd, *J* = 7.1, 1.6 Hz, 2H), 3.47 (d, *J* = 13.4 Hz, 1H), 3.42 (d, *J* = 13.5 Hz, 1H), 2.79 – 2.59 (m, 4H), 2.51 – 2.35 (m, 4H), 2.34 – 2.25 (m, 1H), 2.10 – 2.00 (m, 2H), 1.93 (t, *J* = 4.8 Hz, 1H), 1.89 – 1.82 (m, 1H), 1.82 – 1.67 (m, 4H), 1.19 (t, *J* = 7.1 Hz, 3H), 1.05 (d, *J* = 7.0 Hz, 3H). <sup>13</sup>C NMR (101 MHz, CDCl<sub>3</sub>) δ 175.0, 139.6, 128.8, 128.2, 126.9, 67.2, 62.8, 60.1, 59.5, 57.2, 51.6, 35.1, 33.1, 32.8, 23.3, 14.8, 14.4. HRMS (ESI) calcd for C<sub>21</sub>H<sub>32</sub>N<sub>2</sub>O<sub>2</sub> [M + H]<sup>+</sup> *m/z* = 345.2537, found: 345.2537. IR *v*<sub>max</sub>/cm<sup>-1</sup> (film): 3059, 2964, 2930, 2774, 1728, 1437, 1378, 1303, 1274, 1250, 1198, 1178, 1069, 1027, 720, 696.

#### benzyl 5,5-dimethoxy-4-(pyrrolidin-1-yl)pentanoate (53)

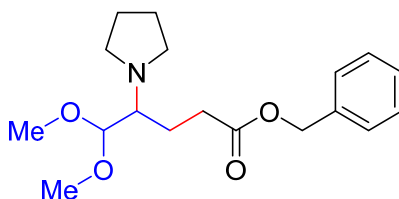

Prepared following the general procedure employing pyrrolidine (72 mg, 1 mmol), 1,1-dimethoxypropan-2-one (177 mg, 1.5 mmol), ethyl 2-mercaptoacetate (180 mg, 1.5 mmol), triphenylphosphine (393 mg, 1.5 mmol), 4Å MS (1 g), di-tert-butyl peroxide (292 mg, 2 mmol) in anhydrous dichloromethane (6 mL). The desired product was obtained as colorless oil (221 mg, 69% yield) after purification by flash column chromatography on silica gel (0.5% Et<sub>3</sub>N in dichloromethane: methanol = 20:1).

<sup>1</sup>H NMR (400 MHz, CDCl<sub>3</sub>) δ 7.47 – 7.28 (m, 5H), 5.10 (s, 2H), 4.34 (d, *J* = 4.7 Hz, 1H), 3.39 (s, 3H), 3.37 (s, 3H), 2.78 – 2.56 (m, 5H), 2.51 (t, *J* = 7.6 Hz, 2H), 1.96 – 1.78 (m, 2H), 1.77 – 1.62 (m, 4H). δ 174.0, 136.3, 128.6, 128.2, 128.1, 106.8, 66.0, 61.2, 55.1, 49.6, 31.8, 23.7, 22.7. HRMS (ESI) calcd for C<sub>18</sub>H<sub>28</sub>NO<sub>4</sub> [M + H]<sup>+</sup> *m/z* = 322.2013, found: 322.2015. IR *v*<sub>max</sub>/cm<sup>-1</sup> (film): 2957, 2830, 1734, 1454, 1380, 1162, 1122, 1073, 975, 735, 697.

#### ethyl 4-phenyl-4-(pyrrolidin-1-yl)butanoate (54)

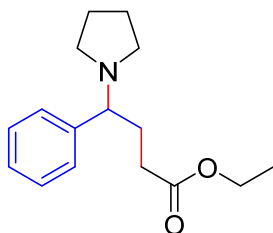

Prepared following the general procedure employing pyrrolidine (72 mg, 1 mmol), acetophenone (180 mg, 1.5 mmol), ethyl 2-mercaptoacetate (180 mg, 1.5 mmol), triphenylphosphine (393 mg, 1.5 mmol), 4Å MS (1 g), di-tert-butyl peroxide (292 mg, 2 mmol) in anhydrous dichloromethane (6 mL). The desired product was obtained as a colorless oil (170 mg, 65% yield) after purification by flash column chromatography on silica gel (0.5% Et<sub>3</sub>N in ethyl acetate).

<sup>1</sup>H NMR (400 MHz, CDCl<sub>3</sub>) δ 7.38 - 7.04 (m, 5H), 4.04 (q, *J* = 7.1 Hz, 2H), 3.08 (dd, *J* = 9.2, 4.1 Hz, 1H), 2.60 - 2.47 (m, 2H), 2.42 - 2.31 (m, 2H), 2.31 - 2.21 (m, 1H), 2.11 - 1.94 (m, 3H), 1.79 - 1.61 (m, 4H), 1.18 (t, *J* = 7.1 Hz, 3H). <sup>13</sup>C NMR (101 MHz, CDCl<sub>3</sub>) δ 173.7, 142.2, 128.4, 128.27, 127.3, 70.2, 60.4, 52.8, 31.0, 30.8, 23.4, 14.3. HRMS (ESI) calcd for C<sub>16</sub>H<sub>24</sub>NO<sub>2</sub> [M + H]<sup>+</sup> *m/z* = 262.1802, found: 262.1806. IR ν<sub>max</sub>/cm<sup>-1</sup> (film): 2966, 2782, 1734, 1451, 1370, 1159, 1028, 763, 702.

#### ethyl 4-(pyrrolidin-1-yl)-4-(p-tolyl)butanoate (55)

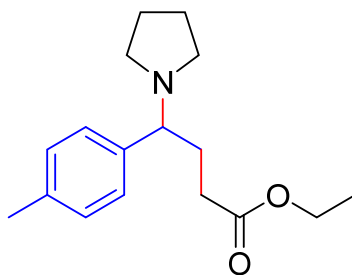

Prepared following the general procedure employing pyrrolidine (72 mg, 1 mmol), 1-(p-tolyl)ethan-1-one (201 mg, 1.5 mmol), ethyl 2-mercaptoacetate (180 mg, 1.5 mmol), triphenylphosphine (393 mg, 1.5 mmol), 4Å MS (1 g), di-tert-butyl peroxide (292 mg, 2 mmol) in anhydrous dichloromethane (6 mL). The desired product was obtained as colorless oil (170 mg, 62% yield) after purification by flash column chromatography on silica gel (0.5% Et<sub>3</sub>N in ethyl acetate).

<sup>1</sup>H NMR (400 MHz, CDCl<sub>3</sub>) δ 7.20 (d, *J* = 8.0 Hz, 2H), 7.11 (d, *J* = 7.8 Hz, 2H), 4.04 (q, *J* = 7.1 Hz, 2H), 3.32 - 3.17 (m, 1H), 2.80 - 2.59 (m, 2H), 2.60 - 2.41 (m, 2H), 2.31 (s, 3H), 2.22 - 1.88 (m, 4H), 1.87 - 1.69 (m, 4H), 1.18 (t, *J* = 7.1 Hz, 3H). <sup>13</sup>C NMR (101 MHz, CDCl<sub>3</sub>) δ 173.5, 137.6, 129.4, 128.6, 128.3, 70.0, 60.4, 52.9, 30.8, 30.2, 23.4, 21.2, 14.3. HRMS (ESI) calcd for C<sub>17</sub>H<sub>26</sub>NO<sub>2</sub> [M + H]<sup>+</sup> *m/z* = 276.1958, found: 276.1960. IR ν<sub>max</sub>/cm<sup>-1</sup> (film): 2959, 1734, 1596, 1443, 1258, 1169, 1069, 1022, 911, 814, 664.

#### ethyl 4-(3-fluorophenyl)-4-(pyrrolidin-1-yl) butanoate (56)

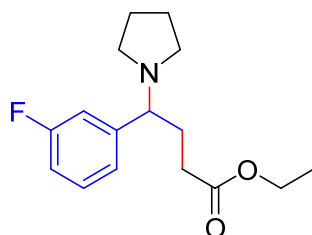

Prepared following the general procedure employing pyrrolidine (72 mg, 1 mmol), 1-(3-fluorophenyl)ethan-1-one (207 mg, 1.5 mmol), ethyl 2-mercaptoacetate (180 mg, 1.5 mmol), triphenylphosphine (393 mg, 1.5 mmol), 4Å MS (1 g), di-tert-butyl peroxide (292 mg, 2 mmol) in anhydrous dichloromethane (6 mL). The desired product was obtained as colorless oil (206 mg, 74% yield) after purification by flash column chromatography on silica gel (0.5% Et<sub>3</sub>N in ethyl acetate).

<sup>1</sup>H NMR (400 MHz, CDCl<sub>3</sub>) δ 7.27 - 7.20 (m, 1H), 7.08 - 6.96 (m, 2H), 6.96 - 6.86 (m, 1H), 4.04 (q, *J* = 7.1 Hz, 2H), 3.12 (dd, *J* = 9.2, 3.8 Hz, 1H), 2.63 - 2.46 (m, 2H), 2.45 - 2.29 (m, 2H), 2.30 - 2.16 (m, 1H), 2.14 - 1.89 (m, 3H), 1.81 - 1.64 (m, 4H), 1.19 (t, *J* = 7.1 Hz, 3H). <sup>13</sup>C NMR (101 MHz, CDCl<sub>3</sub>) δ 173.5, 163.06 (d, *J* = 245.8 Hz), 144.92 (d, *J* = 6.0 Hz), 129.86 (d, *J* = 8.2 Hz), 123.91 (d, *J* = 2.8 Hz), 114.98 (d, *J* = 21.3 Hz), 114.32 (d, *J* = 21.2 Hz), 69.7, 60.5, 52.7, 30.7, 30.7, 23.4, 14.3. <sup>19</sup>F NMR (376 MHz, CDCl<sub>3</sub>) δ -113.4 (s). HRMS (ESI) calcd for C<sub>16</sub>H<sub>23</sub>FNO<sub>2</sub> [M + H]<sup>+</sup> *m/z* = 280.1707, found: 280.1707. IR ν<sub>max</sub>/cm<sup>-1</sup> (film): 2965, 1734, 1588, 1483, 1448, 1369, 1248, 1158, 1029, 786, 701.

#### ethyl 4-(4-chlorophenyl)-4-(pyrrolidin-1-yl)butanoate (57)

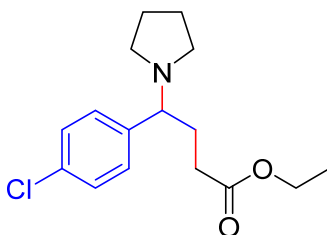

Prepared following the general procedure employing pyrrolidine (72 mg, 1 mmol), 1-(4-chlorophenyl) ethan-1-one (231 mg, 1.5 mmol), ethyl 2-mercaptoacetate (180 mg, 1.5 mmol), triphenylphosphine (393 mg, 1.5 mmol), 4Å MS (1 g), di-tert-butyl peroxide (292 mg, 2 mmol) in anhydrous dichloromethane (6 mL). The desired product was obtained as colorless oil (198 mg, 67% yield) after purification by flash column chromatography on silica gel (0.5% Et<sub>3</sub>N in ethyl acetate).

<sup>1</sup>H NMR (400 MHz, CDCl<sub>3</sub>) δ 7.26 (d, *J* = 8.6 Hz, 2H), 7.20 (d, *J* = 8.5 Hz, 2H), 4.03 (q, *J* = 7.1 Hz, 2H), 3.08 (dd, *J* = 9.3, 4.0 Hz, 1H), 2.63 - 2.41 (m, 2H), 2.41 - 2.29 (m, 2H), 2.29 - 2.18 (m, 1H), 2.12 - 1.85 (m, 3H), 1.80 - 1.61 (m, 4H), 1.18 (t, *J* = 7.1 Hz, 3H). <sup>13</sup>C NMR (101 MHz, CDCl<sub>3</sub>) δ 173.5, 140.8, 133.0, 129.6, 128.6, 69.4, 60.4, 52.7, 30.8, 30.8, 23.4, 14.3. HRMS (ESI) calcd for C<sub>16</sub>H<sub>23</sub>ClNO<sub>2</sub> [M + H]<sup>+</sup> *m/z* = 296.1412, found: 296.1414. IR ν<sub>max</sub>/cm<sup>-1</sup> (film): 2967, 2788, 1734, 1478, 1370, 1159, 1089, 1014, 828.

#### ethyl 4-(4-bromophenyl)-4-(pyrrolidin-1-yl) butanoate (58)

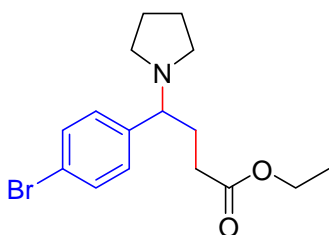

Prepared following the general procedure employing pyrrolidine (72 mg, 1 mmol), 1-(4-bromophenyl) ethan-1-one (297 mg, 1.5 mmol), ethyl 2-mercaptoacetate (180 mg, 1.5 mmol), triphenylphosphine (393 mg, 1.5 mmol), 4Å MS (1 g), di-tert-butyl peroxide (292 mg, 2 mmol) in anhydrous dichloromethane (6 mL). The desired product was obtained as colorless oil (227 mg, 67% yield) after purification by flash column chromatography on silica gel (0.5% Et<sub>3</sub>N in ethyl acetate).

<sup>1</sup>H NMR (400 MHz, CDCl<sub>3</sub>) δ 7.42 (d, *J* = 8.0 Hz, 2H), 7.16 (d, *J* = 8.0 Hz, 2H), 4.04 (q, *J* = 7.1 Hz, 2H), 3.16 - 3.02 (m, 1H), 2.70 - 2.47 (m, 2H), 2.47 - 2.31 (m, 2H), 2.26 - 1.92 (m, 4H), 1.81 - 1.58 (m, 4H), 1.19 (t, *J* = 7.1 Hz, 3H). <sup>13</sup>C NMR (101 MHz, CDCl<sub>3</sub>) δ 173.4, 140.9, 131.6, 130.0, 121.2, 69.5, 60.5, 53.0, 52.8, 30.7, 30.6, 23.5, 23.4, 14.3. HRMS (ESI) calcd for C<sub>16</sub>H<sub>23</sub>BrNO<sub>2</sub> [M + H]<sup>+</sup> *m/z* = 340.0907, found: 340.0907. IR *v*<sub>max</sub>/cm<sup>-1</sup> (film): 2966, 1734, 1484, 1369, 1179, 1070, 1009, 824, 722.

#### ethyl 4-(pyrrolidin-1-yl)-4-(4-(trifluoromethyl)phenyl)butanoate (59)

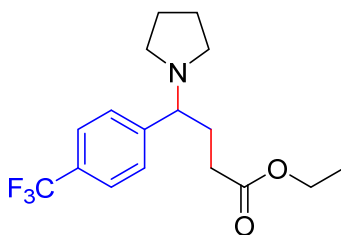

Prepared following the general procedure employing pyrrolidine (72 mg, 1 mmol), 1-(4-(trifluoromethyl) phenyl) ethan-1-one (282 mg, 1.5 mmol), ethyl 2-mercaptoacetate (180 mg, 1.5 mmol), triphenylphosphine (393 mg, 1.5 mmol), 4Å MS (1 g), di-tert-butyl peroxide (292 mg, 2 mmol) in anhydrous dichloromethane (6 mL). The desired product was obtained as colorless oil (250 mg, 76% yield) after purification by flash column chromatography on silica gel (0.5% Et<sub>3</sub>N in ethyl acetate).

<sup>1</sup>H NMR (400 MHz, CDCl<sub>3</sub>) δ 7.54 (d, *J* = 8.0 Hz, 2H), 7.39 (d, *J* = 8.1 Hz, 2H), 4.03 (q, *J* = 7.1 Hz, 2H), 3.17 (dd, *J* = 8.5, 4.1 Hz, 1H), 2.56 - 2.44 (m, 2H), 2.42 - 2.30 (m, 2H), 2.29 - 2.20 (m, 1H), 2.11 - 1.91 (m, 3H), 1.77 - 1.64 (m, 4H), 1.18 (t, *J* = 7.1 Hz, 3H). <sup>13</sup>C NMR (101 MHz, CDCl<sub>3</sub>) δ 173.4, 146.6, 129.6 (d, *J* = 32.3 Hz), 128.6, 125.4 (q, *J* = 3.8 Hz), 123.0, 69.7, 60.5, 52.7, 30.8, 30.6, 23.4, 14.3. <sup>19</sup>F NMR (376 MHz, CDCl<sub>3</sub>) δ -62.5 (s). HRMS (ESI) calcd for C<sub>17</sub>H<sub>23</sub>F<sub>3</sub>NO<sub>2</sub> [M + H]<sup>+</sup> *m/z* = 330.1675, found: 330.1669. IR *v*<sub>max</sub>/cm<sup>-1</sup> (film): 2969, 2791, 1735, 1418, 1325, 1163, 1125, 1067, 1017, 842.

#### ethyl 4-(pyridin-3-yl)-4-(pyrrolidin-1-yl)butanoate (60)

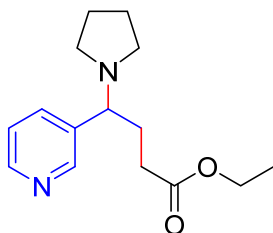

Prepared following the general procedure employing pyrrolidine (72 mg, 1 mmol), 1-(pyridin-3-yl) ethan-1-one (182 mg, 1.5 mmol), ethyl 2-mercaptoacetate (180 mg, 1.5 mmol), triphenylphosphine (393 mg, 1.5 mmol), 4Å MS (1 g), di-tert-butyl peroxide (292 mg, 2 mmol) in anhydrous dichloromethane (6 mL). The desired product was obtained as yellow oil (188 mg, 72% yield) after purification by flash column chromatography on silica gel (0.5% Et<sub>3</sub>N in dichloromethane: methanol = 20:1).

<sup>1</sup>H NMR (400 MHz, CDCl<sub>3</sub>) δ 8.48 - 8.30 (m, 2H), 7.59 (dt, *J* = 7.9, 1.9 Hz, 1H), 7.18 (ddd, *J* = 7.8, 4.8, 0.7 Hz, 1H), 3.97 (q, *J* = 7.1 Hz, 2H), 3.13 (dd, *J* = 8.8, 4.2 Hz, 1H), 2.55 - 2.39 (m, 2H), 2.35 - 2.26 (m, 2H), 2.26 - 2.15 (m, 1H), 2.09 - 1.88 (m, 3H), 1.74 - 1.55 (m, 4H), 1.12 (t, *J* = 7.1 Hz, 3H). <sup>13</sup>C NMR (101 MHz, CDCl<sub>3</sub>) δ 173.2, 149.8, 148.9, 137.4, 135.5, 123.5, 67.2, 60.4, 52.5, 30.5, 23.2, 14.2. HRMS (ESI) calcd for C<sub>15</sub>H<sub>23</sub>N<sub>2</sub>O<sub>2</sub> [M + H]<sup>+</sup> *m/z* = 263.1754, found: 263.1755. IR ν<sub>max</sub>/cm<sup>-1</sup> (film): 2968, 2788, 1733, 1576, 1424, 1370, 1319, 1180, 1025, 808, 718.

#### ethyl 4-(naphthalen-2-yl)-4-(pyrrolidin-1-yl)butanoate (61)

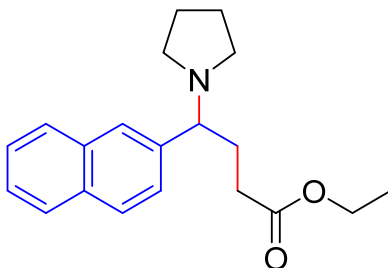

Prepared following the general procedure employing pyrrolidine (72 mg, 1 mmol), 1-(naphthalen-2-yl) ethan-1-one (255 mg, 1.5 mmol), ethyl 2-mercaptoacetate (180 mg, 1.5 mmol), triphenylphosphine (393 mg, 1.5 mmol), 4Å MS (1 g), di-tert-butyl peroxide (292 mg, 2 mmol) in anhydrous dichloromethane (6 mL). The desired product was obtained as colorless oil (180 mg, 58% yield) after purification by flash column chromatography on silica gel (0.5% Et<sub>3</sub>N in ethyl acetate).

<sup>1</sup>H NMR (400 MHz, CDCl<sub>3</sub>) δ 7.80 (t, *J* = 7.5 Hz, 2H), 7.75 - 7.57 (m, 2H), 7.58 - 7.50 (m, 1H), 7.49 - 7.42 (m, 2H), 4.01 (q, *J* = 7.1 Hz, 2H), 3.53 - 3.40 (m, 1H), 2.83 - 2.63 (m, 2H), 2.56 - 2.44 (m, 2H), 2.43 - 2.31 (m, 1H), 2.11 - 1.98 (m, 2H), 1.97 - 1.88 (m, 1H), 1.87 - 1.71 (m, 4H), 1.15 (t, *J* = 7.1 Hz, 3H). <sup>13</sup>C NMR (101 MHz, CDCl<sub>3</sub>) δ 173.5, 133.3, 133.2, 132.3, 132.2, 128.7, 128.6, 128.0, 127.8, 126.2, 126.0, 70.5, 60.4, 53.1, 30.9, 29.6, 23.5, 14.3. HRMS (ESI) calcd for C<sub>20</sub>H<sub>26</sub>NO<sub>2</sub> [M + H]<sup>+</sup> *m/z* = 312.1958, found: 312.1961. IR ν<sub>max</sub>/cm<sup>-1</sup> (film): 2965, 1731, 1437, 1197, 1118, 1027, 747, 720, 695.

#### ethyl 4-(9H-fluoren-3-yl)-4-(pyrrolidin-1-yl)butanoate (62)

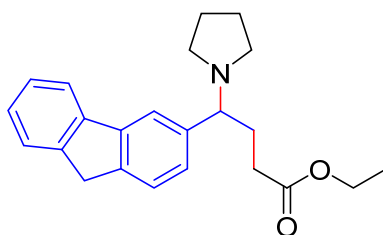

Prepared following the general procedure employing pyrrolidine (72 mg, 1 mmol), 1-(9H-fluoren-3-yl) ethan-1-one (312 mg, 1.5 mmol), ethyl 2-mercaptoacetate (180 mg, 1.5 mmol), triphenylphosphine (393 mg, 1.5 mmol), 4Å MS (1 g), di-tert-butyl peroxide (292 mg, 2 mmol) in anhydrous dichloromethane (6 mL). The desired product was obtained as colorless oil (143 mg, 41% yield) after purification by flash column chromatography on silica gel (0.5% Et<sub>3</sub>N in dichloromethane: methanol = 20:1).

<sup>1</sup>H NMR (400 MHz, CDCl<sub>3</sub>) δ 7.72 (dd, *J* = 12.8, 7.7 Hz, 2H), 7.57 - 7.47 (m, 2H), 7.40 - 7.25 (m, 3H), 4.03 (q, *J* = 7.1 Hz, 2H), 3.87 (s, 2H), 3.47 (t, *J* = 6.8 Hz, 1H), 2.80 - 2.66 (m, 2H), 2.59 - 2.50 (m, 2H), 2.42 - 2.29 (m, 2H), 2.20 - 2.09 (m, 1H), 1.94 - 1.87 (m, 1H), 1.85 - 1.74 (m, 4H), 1.17 (t, *J* = 7.1 Hz, 3H). <sup>13</sup>C NMR (101 MHz, CDCl<sub>3</sub>) δ 173.5, 143.8, 143.5, 141.6, 141.4, 127.3, 126.9, 125.2, 124.8, 119.9, 119.9, 70.5, 60.4, 53.0, 37.0, 30.9, 30.9, 23.4, 14.3. HRMS (ESI) calcd for C<sub>23</sub>H<sub>28</sub>NO<sub>2</sub> [M + H]<sup>+</sup> *m/z* = 350.2115, found: 350.2117. IR *v*<sub>max</sub>/cm<sup>-1</sup> (film): 2965, 1732, 1640, 1436, 1372, 1268, 1176, 1028, 771, 738.

#### benzyl 3-benzyl-4-(benzyl(methyl)amino)butanoate (63)

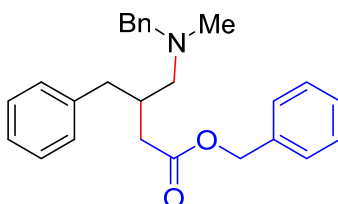

Prepared following the general procedure employing N-methyl-1-phenylmethanamine (121 mg, 1 mmol), 3-phenylpropanal (201 mg, 1.5 mmol), benzyl 2-mercaptoacetate (273 mg, 1.5 mmol), triphenylphosphine (393 mg, 1.5 mmol), 4Å MS (1 g), di-tert-butyl peroxide (292 mg, 2 mmol) in anhydrous dichloromethane (6 mL). The desired product was obtained as colorless oil (352 mg, 91% yield) after purification by flash column chromatography on silica gel (0.5% Et<sub>3</sub>N in dichloromethane).

<sup>1</sup>H NMR (400 MHz, CDCl<sub>3</sub>) δ 7.55 - 6.93 (m, 15H), 5.08 (s, 2H), 3.48 (s, 2H), 2.79 (dd, *J* = 10.6, 5.2 Hz, 1H), 2.61 - 2.42 (m, 3H), 2.35 - 2.25 (m, 3H), 2.16 (s, 3H). <sup>13</sup>C NMR (101 MHz, CDCl<sub>3</sub>) δ 173.1, 134.0, 139.4, 136.2, 129.4, 129.1, 128.6, 128.4, 128.3, 128.2, 127.0, 126.1, 66.1, 62.9, 61.5, 42.5, 38.9, 37.3, 35.6. HRMS (ESI) calcd for C<sub>26</sub>H<sub>30</sub>NO<sub>2</sub> [M + H]<sup>+</sup> *m/z* = 388.2271, found: 388.2277. IR *v*<sub>max</sub>/cm<sup>-1</sup> (film): 3027, 2928, 1734, 1495, 1453, 1256, 1148, 1025, 740, 698.

#### benzyl 3-benzyl-4-(benzyl(methyl)amino)butanoate (derived from disulfide) (63)

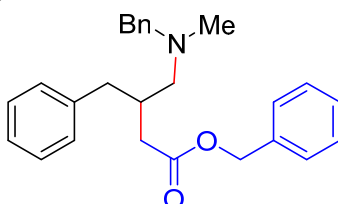

Prepared following the general procedure employing N-methyl-1-phenylmethanamine (121mg, 1 mmol), 3-phenylpropanal (201 mg, 1.5 mmol), dibenzyl 2, 2'-disulfanediyldiacetate (273 mg, 0.75 mmol), triphenylphosphine (393 mg, 1.5 mmol), 4Å MS (1 g), di-tert-butyl peroxide (292 mg, 2 mmol) in anhydrous dichloromethane (6 mL). The desired product was obtained as colorless oil (305 mg, 79% yield) after purification by flash column chromatography on silica gel (0.5% Et<sub>3</sub>N in dichloromethane).

<sup>1</sup>H NMR (400 MHz, CDCl<sub>3</sub>) δ 7.72 - 6.98 (m, 15H), 5.12 (s, 2H), 3.50 (s, 2H), 2.82 (dd, *J* = 12.7, 5.0 Hz, 1H), 2.65 - 2.44 (m, 3H), 2.41 - 2.23 (m, 3H), 2.20 (s, 3H). <sup>13</sup>C NMR (101 MHz, CDCl<sub>3</sub>) δ 173.1, 140.0, 139.4, 136.2, 129.4, 129.0, 128.6, 128.4, 128.3, 128.2, 128.2, 126.9, 126.1, 66.1, 62.8, 61.5, 42.5, 38.9, 37.3, 35.6. HRMS (ESI) calcd for C<sub>26</sub>H<sub>29</sub>NO<sub>2</sub> [M + H]<sup>+</sup> *m/z* = 388.2271, found: 388.2276. IR *v*<sub>max</sub>/cm<sup>-1</sup> (film): 3027, 2943, 1732, 1495, 1453, 1380, 1256, 1211, 1148, 1025, 740, 698.

#### ethyl 3-benzyl-4-(benzyl(methyl)amino)-2-methylbutanoate (64)

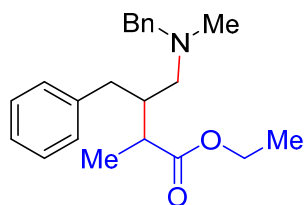

Prepared following the general procedure employing N-methyl-1-phenylmethanamine (121mg, 1 mmol), 3-phenylpropanal (201 mg, 1.5 mmol), ethyl 2-mercaptopropanoate (201 mg, 1.5 mmol), triphenylphosphine (393 mg, 1.5 mmol), 4Å MS (1 g), di-tert-butyl peroxide (292 mg, 2 mmol) in anhydrous dichloromethane (6 mL). The desired product was obtained as colorless oil (258 mg, 76% yield) after purification by flash column chromatography on silica gel (0.5% Et<sub>3</sub>N in dichloromethane). The dr value (1:1) was determined by <sup>1</sup>H NMR spectra.

<sup>1</sup>H NMR (400 MHz, CDCl<sub>3</sub>) δ 7.47 - 6.93 (m, 10H), 4.05 (q, *J* = 7.1 Hz, 2H), 3.52 (dd, *J* = 26.0, 12.4 Hz, 1H), 3.33 (dd, *J* = 13.1, 8.9 Hz, 1H), 2.93 - 2.12 (m, 6H), 2.10 (s, 3H), 1.22 (dt, *J* = 9.3, 7.2 Hz, 3H), 1.08 (d, *J* = 7.1 Hz, 1.5H, diastereomer A), 1.02 (d, *J* = 7.1 Hz, 1.5H, diastereomer B). <sup>13</sup>C NMR (101 MHz, CDCl<sub>3</sub>, double carbon signals) δ 176.5, 175.9, 140.9, 140.9, 129.3, 129.2, 129.2, 128.7, 128.6, 128.5, 128.4, 128.3, 128.3, 128.2, 127.0, 127.0, 126.0, 126.0, 63.1, 62.7, 60.2, 60.2, 58.9, 58.4, 42.5, 42.5, 40.7, 40.6, 39.5, 36.6, 35.5, 34.6, 14.4, 14.4, 11.4, 11.4. HRMS (ESI) calcd for C<sub>22</sub>H<sub>30</sub>NO<sub>2</sub> [M + H]<sup>+</sup> *m/z* = 340.2271, found: 340.2273. IR *v*<sub>max</sub>/cm<sup>-1</sup> (film): 3026, 2978, 2932, 1728, 1494, 1453, 1367, 1183, 1025, 740, 699.

#### benzyl 3-benzyl-4-(benzyl(methyl)amino)-2-methylbutanoate (65)

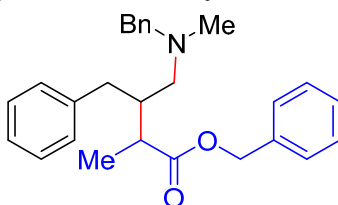

Prepared following the general procedure employing N-methyl-1-phenylmethanamine (121mg, 1 mmol), 3-phenylpropanal (201 mg, 1.5 mmol), benzyl 2-mercaptopropanoate (294 mg, 1.5 mmol), triphenylphosphine (393 mg, 1.5 mmol), 4Å MS (1 g), di-tert-butyl peroxide (292 mg, 2 mmol) in anhydrous dichloromethane (6 mL). The desired product was obtained as colorless oil (257 mg,

64% yield) after purification by flash column chromatography on silica gel (0.5% Et<sub>3</sub>N in dichloromethane). The dr value (1:1) was determined by <sup>1</sup>H NMR spectra.

<sup>1</sup>H NMR (400 MHz, CDCl<sub>3</sub>) δ 7.41 - 7.05 (m, 15H), 5.22 - 4.89 (m, 2H), 3.55 - 3.25 (m, 2H), 3.05 - 2.70 (m, 2H), 2.69 - 2.14 (m, 4H), 2.09 (s, 3H), 1.14 (d, *J* = 7.1 Hz, 1.5H, diastereomer A), 1.07 (d, *J* = 7.1 Hz, 1.5H, diastereomer B). <sup>13</sup>C NMR (101 MHz, CDCl<sub>3</sub>, double carbon signals) δ 176.3, 175.7, 140.7, 139.5, 139.4, 136.4, 136.4, 129.3, 129.2, 129.1, 128.6, 128.6, 128.6, 128.4, 128.4, 128.3, 128.3, 128.2, 128.2, 128.1, 127.7, 127.1, 127.0, 126.0, 125.9, 66.1, 66.1, 63.0, 62.6, 58.8, 58.7, 58.3, 42.5, 42.4, 40.7, 40.7, 39.6, 39.5, 36.6, 35.4, 11.4, 11.3. HRMS (ESI) calcd for C<sub>27</sub>H<sub>32</sub>NO<sub>2</sub> [M + H]<sup>+</sup> *m/z* = 402.2428, found: 402.2430. IR *v*<sub>max</sub>/cm<sup>-1</sup> (film): 3027, 2944, 1730, 1495, 1453, 1170, 1027, 740, 698.

### dibenzyl 2-(1-(benzyl(methyl)amino)-3-phenylpropan-2-yl) succinate (66)

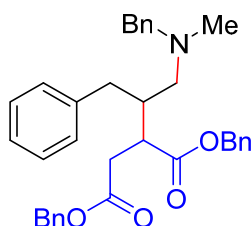

Prepared following the general procedure employing N-methyl-1-phenylmethanamine (121 mg, 1 mmol), 3-phenylpropanal (201 mg, 1.5 mmol), dibenzyl 2-mercaptosuccinate (495 mg, 1.5 mmol), triphenylphosphine (393 mg, 1.5 mmol), 4 Å MS (1 g), di-tert-butyl peroxide (292 mg, 2 mmol) in anhydrous dichloromethane (6 mL). The desired product was obtained as colorless oil (417 mg, 78% yield) after purification by flash column chromatography on silica gel (0.5% Et<sub>3</sub>N in petroleum ether: ethyl acetate = 3:1). The dr value (1:1) was determined by <sup>1</sup>H NMR spectra.

<sup>1</sup>H NMR (400 MHz, CDCl<sub>3</sub>) δ 7.68 - 6.90 (m, 20H), 5.31 - 5.01 (m, 4H), 3.64 (dd, *J* = 16.0, 12.5 Hz, 1H), 3.50 - 3.28 (m, 2H), 2.97 - 2.07 (m, 7H), 2.23 (s, 1.5H, diastereomer A), 2.11 (s, 1.5H, diastereomer B). <sup>13</sup>C NMR (101 MHz, CDCl<sub>3</sub>, double carbon signals) δ 174.4, 173.6, 172.1, 172.0, 141.4, 141.2, 139.9, 139.1, 139.0, 136.0, 135.9, 135.9, 129.1, 129.0, 128.9, 128.6, 128.6, 128.5, 128.4, 128.4, 128.4, 128.3, 128.3, 128.2, 128.2, 128.1, 128.1, 128.1, 127.4, 127.0, 126.9, 126.8, 126.5, 126.3, 126.1, 126.0, 66.3, 66.3, 66.3, 60.3, 62.8, 62.6, 58.8, 57.4, 42.4, 42.3, 41.8, 41.2, 40.0, 39.8, 36.5, 35.8, 31.9, 30.9. HRMS (ESI) calcd for C<sub>35</sub>H<sub>38</sub>NO<sub>4</sub> [M + H]<sup>+</sup> *m/z* = 536.2795, found: 536.2795. IR *v*<sub>max</sub>/cm<sup>-1</sup> (film): 3062, 3029, 2945, 1732, 1496, 1454, 1387, 1259, 1213, 1159, 1002, 744, 699.

### 3-(1-(benzyl(methyl)amino)-3-phenylpropan-2-yl) dihydrofuran-2(3H)-one (67)

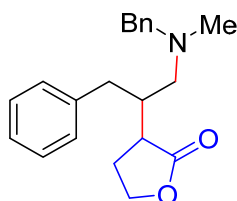

Prepared following the general procedure employing N-methyl-1-phenylmethanamine (121 mg, 1 mmol), 3-phenylpropanal (201 mg, 1.5 mmol), 3-mercaptodihydrofuran-2(3H)-one (177 mg, 1.5 mmol), triphenylphosphine (393 mg, 1.5 mmol), 4 Å MS (1 g), di-tert-butyl peroxide (292 mg, 2 mmol) in anhydrous dichloromethane (6 mL). The desired product was obtained as a colorless oil



(216 mg, 67% yield) after purification by flash column chromatography on silica gel (0.5% Et<sub>3</sub>N in petroleum ether: ethyl acetate = 4:1). The dr value (1:1) was determined by <sup>1</sup>H NMR spectra.

<sup>1</sup>H NMR (400 MHz, CDCl<sub>3</sub>) δ 7.43 - 7.02 (m, 10H), 4.31 - 4.02 (m, 2H), 3.59 - 3.05 (m, 3H), 2.93 - 2.68 (m, 1H), 2.67 - 2.57 (m, 1H), 2.55 - 2.24 (m, 3H), 2.18 (s, 1.5H, diastereomer A), 2.12 (s, 1.5H, diastereomer B), 1.94 - 1.81 (m, 2H). <sup>13</sup>C NMR (101 MHz, CDCl<sub>3</sub>, double carbon signals) δ 179.8, 179.2, 140.0, 139.8, 139.3, 139.2, 129.3, 129.3, 129.2, 129.1, 128.7, 128.5, 128.5, 128.3, 127.2, 127.1, 126.5, 126.3, 66.6, 66.5, 63.4, 62.7, 58.8, 57.8, 42.9, 42.8, 40.8, 40.1, 38.2, 38.0, 37.8, 35.7, 23.5, 22.6. HRMS (ESI) calcd for C<sub>21</sub>H<sub>26</sub>NO<sub>2</sub> [M + H]<sup>+</sup> m/z = 324.1958, found: 324.1959. IR ν<sub>max</sub>/cm<sup>-1</sup> (film): 2927, 1766, 1494, 1452, 1372, 1161, 1026, 741, 699.

### 3-benzyl-4-(benzyl(methyl)amino)-N,N-diethylbutanamide (68)

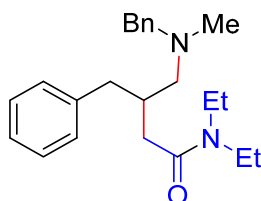

Prepared following the general procedure employing N-methyl-1-phenylmethanamine (121mg, 1 mmol), 3-phenylpropanal (201 mg, 1.5 mmol), N, N-diethyl-2-mercaptoacetamide (220 mg, 1.5 mmol), triphenylphosphine (393 mg, 1.5 mmol), 4Å MS (1 g), di-tert-butyl peroxide (292 mg, 2 mmol) in anhydrous dichloromethane (6 mL). The desired product was obtained as colorless oil (229 mg, 65% yield) after purification by flash column chromatography on silica gel (0.5% Et<sub>3</sub>N in petroleum ether: ethyl acetate = 1:1).

<sup>1</sup>H NMR (400 MHz, CDCl<sub>3</sub>) δ 7.47 - 6.98 (m, 10H), 3.57 (br, 2H), 3.32 (dq, *J* = 14.1, 7.0 Hz, 2H), 3.17 (dq, *J* = 14.1, 7.0 Hz, 2H), 2.77 (dd, *J* = 13.4, 6.4 Hz, 1H), 2.66 (dd, *J* = 13.4, 6.4 Hz, 1H), 2.59 - 2.50 (m, 1H), 2.46 - 2.03 (m, 7H), 1.06 (dt, *J* = 10.0, 7.1 Hz, 6H). <sup>13</sup>C NMR (101 MHz, CDCl<sub>3</sub>) δ 171.5, 131.6, 129.6, 128.4, 128.4, 126.1, 62.4, 61.0, 42.4, 42.0, 40.4, 38.9, 35.3, 35.2, 14.4, 13.3. HRMS (ESI) calcd for C<sub>23</sub>H<sub>33</sub>N<sub>2</sub>O [M + H]<sup>+</sup> m/z = 353.2587, found: 353.2589. IR ν<sub>max</sub>/cm<sup>-1</sup> (film): 2929, 1640, 1494, 1452, 1257, 1130, 1073, 1025, 740, 699.

### 1-((3R,5R)-adamantan-1-yl)-3-benzyl-4-(benzyl(methyl)amino)butan-1-one (69)

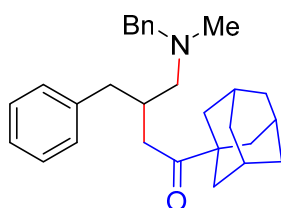

Prepared following the general procedure employing N-methyl-1-phenylmethanamine (121mg, 1 mmol), 3-phenylpropanal (201 mg, 1.5 mmol), 1-((3R,5R)-adamantan-1-yl)-2-mercaptoethan-1-one (315 mg, 1.5 mmol), triphenylphosphine (393 mg, 1.5 mmol), 4Å MS (1 g), di-tert-butyl peroxide (292 mg, 2 mmol) in anhydrous dichloromethane (6 mL). The desired product was obtained as colorless oil (365 mg, 88% yield) after purification by flash column chromatography on silica gel (0.5% Et<sub>3</sub>N in dichloromethane).

<sup>1</sup>H NMR (400 MHz, CDCl<sub>3</sub>) δ 7.52 - 6.91 (m, 10H), 3.44 (s, 2H), 2.74 - 2.63 (m, 1H), 2.62 - 2.46 (m, 3H), 2.34 - 2.15 (m, 3H), 2.13 (s, 3H), 2.01 (s, 3H), 1.86 - 1.52 (m, 12H). <sup>13</sup>C NMR (101 MHz,

CDCl<sub>3</sub>)  $\delta$  215.4, 140.6, 139.5, 129.5, 129.2, 128.3, 128.2, 126.9, 125.9, 62.5, 61.4, 46.5, 42.7, 38.9, 38.7, 38.4, 36.8, 33.5, 28.2. HRMS (ESI) calcd for C<sub>29</sub>H<sub>38</sub>NO [M + H]<sup>+</sup> m/z = 416.2948, found: 416.2947. IR  $\nu_{\max}/\text{cm}^{-1}$  (film): 3025, 2904, 2849, 2790, 1696, 1494, 1452, 1364, 1024, 739, 699.

#### 4-benzyl-5-(benzyl(methyl)amino)-3-methylpentan-2-one (70)

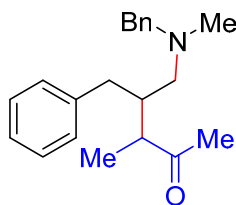

Prepared following the general procedure employing N-methyl-1-phenylmethanamine (121 mg, 1 mmol), 3-phenylpropanal (201 mg, 1.5 mmol), 3-mercaptobutan-2-one (156 mg, 1.5 mmol), triphenylphosphine (393 mg, 1.5 mmol), 4Å MS (1 g), di-tert-butyl peroxide (292 mg, 2 mmol) in anhydrous dichloromethane (6 mL). The desired product was obtained as colorless oil (216 mg, 70% yield) after purification by flash column chromatography on silica gel (0.5% Et<sub>3</sub>N in petroleum ether: ethyl acetate = 5:1). The dr value (1:1) was determined by <sup>1</sup>H NMR spectra.

<sup>1</sup>H NMR (400 MHz, CDCl<sub>3</sub>)  $\delta$  7.38 - 6.98 (m, 10H), 3.56 - 3.44 (m, 1H), 3.38 - 3.18 (m, 1H), 2.99 - 2.80 (m, 1H), 2.65 - 2.13 (m, 5H), 2.11 (s, 1.5H), 2.09 (s, 1.5H), 2.07 (s, 1.5H), 2.03 (s, 1.5H), 1.01 (d, *J* = 7.0 Hz, 1.5H, diastereomer A), 0.96 (d, *J* = 7.0 Hz, 1.5H, diastereomer B). <sup>13</sup>C NMR (101 MHz, CDCl<sub>3</sub>, double carbon signals)  $\delta$  212.3, 211.5, 140.9, 140.8, 139.3, 139.2, 129.2, 129.2, 129.2, 129.1, 128.6, 128.6, 128.4, 128.3, 127.1, 127.0, 126.2, 126.1, 63.0, 62.6, 58.8, 58.4, 48.1, 47.1, 42.6, 42.6, 40.3, 39.9, 37.0, 35.2, 28.7, 28.6, 10.8, 10.1. HRMS (ESI) calcd for C<sub>21</sub>H<sub>28</sub>NO [M + H]<sup>+</sup> m/z = 310.2165, found: 310.2165. IR  $\nu_{\max}/\text{cm}^{-1}$  (film): 3026, 2926, 2852, 2788, 1707, 1494, 1453, 1353, 1075, 1026, 741, 699.

#### 3-benzyl-4-(benzyl(methyl)amino)-2-methyl-1-(p-tolyl)butan-1-one (71)

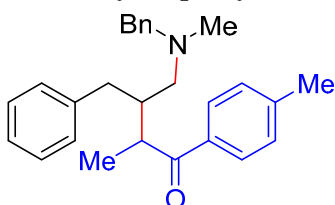

Prepared following the general procedure employing N-methyl-1-phenylmethanamine (121 mg, 1 mmol), 3-phenylpropanal (201 mg, 1.5 mmol), 2-mercapto-1-(p-tolyl) propan-1-one (270 mg, 1.5 mmol), triphenylphosphine (393 mg, 1.5 mmol), 4Å MS (1 g), di-tert-butyl peroxide (292 mg, 2 mmol) in anhydrous dichloromethane (6 mL). The desired product was obtained as colorless oil (301 mg, 78% yield) after purification by flash column chromatography on silica gel (0.5% Et<sub>3</sub>N in petroleum ether: ethyl acetate = 5:1). The dr value (1:1) was determined by <sup>1</sup>H NMR spectra.

<sup>1</sup>H NMR (400 MHz, CDCl<sub>3</sub>)  $\delta$  7.89 (d, *J* = 8.2 Hz, 1H), 7.42 (d, *J* = 8.2 Hz, 1H), 7.37 - 7.04 (m, 11H), 6.98 (d, *J* = 6.9 Hz, 1H), 3.92 (qd, *J* = 6.8, 3.1 Hz, 0.5H), 3.59 - 3.39 (m, 1.5H), 3.25 (t, *J* = 13.4 Hz, 1H), 3.07 (dd, *J* = 13.5, 4.6 Hz, 0.5H), 2.79 - 2.63 (m, 1H), 2.52 (dd, *J* = 13.4, 9.0 Hz, 0.5H), 2.41 (s, 1.5H), 2.35 (s, 1.5H), 2.32 - 2.07 (m, 3H), 2.06 (s, 1.5H), 1.95 (s, 1.5H), 1.13 (d, *J* = 6.8 Hz, 1.5H, diastereomer A), 1.01 (d, *J* = 6.8 Hz, 1.5H, diastereomer B). <sup>13</sup>C NMR (101 MHz, CDCl<sub>3</sub>, double carbon signals)  $\delta$  203.9, 203.4, 143.2, 143.2, 141.1, 140.9, 134.8, 134.4, 129.5, 129.3, 129.2, 129.2, 129.2, 129.1, 128.7, 128.6, 128.6, 128.5, 128.5, 128.5, 128.3, 128.2, 127.0,

126.9, 126.2, 125.9, 62.7, 62.6, 58.5, 58.1, 42.7, 41.6, 41.3, 40.7, 40.4, 36.9, 34.6, 34.6, 21.7, 21.6, 10.9, 10.3. HRMS (ESI) calcd for  $C_{27}H_{32}NO$   $[M + H]^+$   $m/z = 386.2478$ , found: 386.2478. IR  $\nu_{max}/cm^{-1}$  (film): 3025, 2941, 1676, 1605, 1452, 1255, 1181, 1026, 971, 741, 699.

**ethane-1,2-diyl bis(3-benzyl-4-(benzyl(methyl)amino)butanoate) (72)**

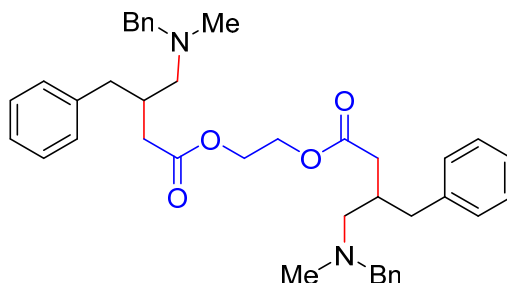

Prepared following the general procedure employing N-methyl-1-phenylmethanamine (242 mg, 2 mmol), 3-phenylpropanal (402 mg, 3 mmol), ethane-1,2-diyl bis(2-mercaptoacetate) (105 mg, 0.5 mmol), triphenylphosphine (393 mg, 1.5 mmol), 4Å MS (1 g), di-tert-butyl peroxide (292 mg, 2 mmol) in anhydrous dichloromethane (6 mL). The desired product was obtained as colorless oil (446 mg, 72% yield) after purification by flash column chromatography on silica gel (0.5%  $Et_3N$  in petroleum ether: ethyl acetate = 3:1).

$^1H$  NMR (400 MHz,  $CDCl_3$ )  $\delta$  7.51 - 7.04 (m, 20H), 4.24 (s, 4H), 3.53 (dd,  $J = 15.7, 13.1$  Hz, 4H), 2.88 - 2.72 (m, 2H), 2.71 - 2.26 (m, 12H), 2.23 (s, 6H).  $^{13}C$  NMR (101 MHz,  $CDCl_3$ )  $\delta$  172.9, 139.8, 139.2, 129.3, 129.0, 128.2, 128.1, 126.9, 126.0, 62.8, 61.9, 61.4, 42.4, 38.8, 37.1, 35.4. HRMS (ESI) calcd for  $C_{40}H_{49}N_2O_4$   $[M + H]^+$   $m/z = 621.3687$ , found: 621.3688. IR  $\nu_{max}/cm^{-1}$  (film): 3026, 2946, 2790, 1736, 1494, 1453, 1375, 1246, 1147, 1025, 741, 699.

**Late-stage modification of commercial drugs**

**ethyl 3-benzyl-4-(methyl(3-phenyl-3-(4-(trifluoromethyl)phenoxy)propyl)amino)butanoate (73)**

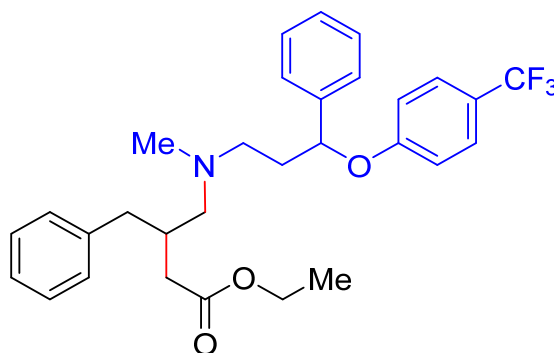

Prepared following the general procedure employing N-methyl-3-phenyl-3-(4-(trifluoromethyl)phenoxy)propan-1-amine (309 mg, 1 mmol), 3-phenylpropanal (201 mg, 1.5 mmol), ethyl 2-mercaptoacetate (180 mg, 1.5 mmol), triphenylphosphine (393 mg, 1.5 mmol), 4Å MS (1 g), di-tert-butyl peroxide (292mg, 2 mmol) in anhydrous dichloromethane (6 mL). The desired product was obtained as colorless oil (437 mg, 85% yield) after purification by flash column

chromatography on silica gel (0.5% Et<sub>3</sub>N in dichloromethane). The dr value (1:1) was determined by <sup>1</sup>H NMR spectra.

<sup>1</sup>H NMR (400 MHz, CDCl<sub>3</sub>) δ 7.47 - 7.12 (m, 12H), 6.94 (d, *J* = 8.8 Hz, 2H), 5.35 (ddd, *J* = 8.4, 4.4, 1.4 Hz, 1H), 4.14 - 3.93 (m, 2H), 3.19 - 2.38 (m, 7H), 2.37 - 2.10 (m, 3H), 2.22 (s, 3H), 2.01 - 1.89 (m, 1H), 1.23 (t, *J* = 7.1 Hz, 1.5H, diastereomer A), 1.22 (t, *J* = 7.1 Hz, 1.5H, diastereomer B). <sup>13</sup>C NMR (101 MHz, CDCl<sub>3</sub>, double carbon signals) δ 173.30, 173.23, 160.82, 141.49, 141.43, 139.93, 139.92, 129.31, 129.31, 129.05, 128.97, 128.81, 128.76, 128.55, 128.47, 128.31, 127.82, 127.81, 126.95 - 126.67 (m), 126.64, 126.50, 126.08, 125.94, 125.92, 123.02 (d, *J* = 30.4 Hz), 122.38 (d, *J* = 32.5 Hz), 115.85, 78.34, 78.30, 62.12, 62.00, 58.77, 58.37, 54.41, 54.37, 42.48, 42.46, 39.01, 38.94, 37.38, 37.33, 36.65, 36.59, 35.64, 35.50, 14.26. <sup>19</sup>F NMR (376 MHz, CDCl<sub>3</sub>) δ -61.39 (s), -61.40 (s). HRMS (ESI) calcd for C<sub>30</sub>H<sub>35</sub>F<sub>3</sub>NO<sub>3</sub> [M + H]<sup>+</sup> *m/z* = 514.2564, found: 514.2566. IR *v*<sub>max</sub>/cm<sup>-1</sup> (film): 2932, 1730, 1614, 1518, 1495, 1453, 1327, 1251, 1160, 1118, 1067, 1030, 835, 746, 700.

**ethyl 3-benzyl-4-(((1*S*,4*S*)-4-(3,4-dichlorophenyl)-1,2,3,4-tetrahydronaphthalen-1-yl) (methyl) amino)butanoate (74)**

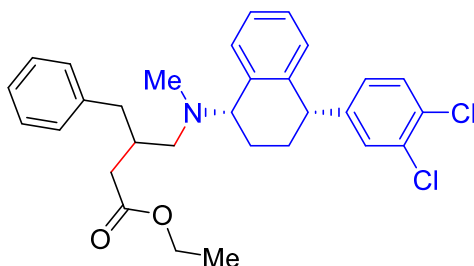

Prepared following the general procedure employing (1*S*,4*S*)-4-(3,4-dichlorophenyl)-*N*-methyl-1,2,3,4-tetrahydronaphthalen-1-amine (305 mg, 1 mmol), 3-phenylpropanal (201 mg, 1.5 mmol), ethyl 2-mercaptoacetate (180 mg, 1.5 mmol), triphenylphosphine (393 mg, 1.5 mmol), 4Å MS (1 g), di-*tert*-butyl peroxide (292 mg, 2 mmol) in anhydrous dichloromethane (6 mL). The desired product was obtained as colorless oil (417 mg, 82% yield) after purification by flash column chromatography on silica gel (0.5% Et<sub>3</sub>N in petroleum ether: ethyl acetate = 3:1). The dr value (2:1) was determined by <sup>1</sup>H NMR spectra.

<sup>1</sup>H NMR (400 MHz, CDCl<sub>3</sub>) δ 7.85 (d, *J* = 7.8 Hz, 1H), 7.41 - 7.00 (m, 9H), 6.95 - 6.77 (m, 2H), 4.20 - 4.01 (m, 3H), 3.99 - 3.82 (m, 1H), 2.98 - 2.26 (m, 7H), 2.21 (s, 2H, major diastereomer), 2.17 (s, 1H, minor diastereomer), 2.13 - 1.89 (m, 2H), 1.73 - 1.51 (m, 2H), 1.25 (td, *J* = 7.1, 2.9 Hz, 3H). <sup>13</sup>C NMR (101 MHz, CDCl<sub>3</sub>, double carbon signals) δ 173.4, 173.4, 164.4, 147.6, 140.2, 140.1, 139.6, 139.5, 138.2, 138.2, 132.2, 130.8, 130.3, 130.3, 130.0, 130.0, 129.9, 129.9, 129.4, 129.4, 128.7, 128.7, 128.4, 128.3, 128.3, 127.1, 126.9, 126.9, 126.1, 126.1, 62.6, 62.5, 60.2, 58.7, 57.5, 43.7, 38.9, 37.1, 37.0, 36.2, 35.8, 35.7, 30.2, 30.2, 15.5, 15.4, 14.4. HRMS (ESI) calcd for C<sub>30</sub>H<sub>34</sub>Cl<sub>2</sub>NO<sub>2</sub> [M + H]<sup>+</sup> *m/z* = 510.1961, found: 510.1962. IR *v*<sub>max</sub>/cm<sup>-1</sup> (film): 2936, 2855, 1731, 1466, 1452, 1373, 1252, 1149, 1029, 784, 740, 700.

**ethyl 3-benzyl-4-(4-(8-chloro-5,6-dihydro-11*H*-benzo[5,6]cyclohepta[1,2-*b*]pyridin-11-ylidene) piperidin-1-yl)butanoate (75)**

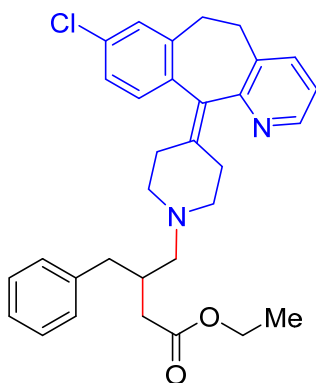

Prepared following the general procedure employing 8-chloro-11-(piperidin-4-ylidene)-6,11-dihydro-5H-benzo[5,6]cyclohepta[1,2-b]pyridine (310 mg, 1 mmol), 3-phenylpropanal (201 mg, 1.5 mmol), ethyl 2-mercaptoacetate (180 mg, 1.5 mmol), triphenylphosphine (393 mg, 1.5 mmol), 4Å MS (1 g), di-tert-butyl peroxide (292 mg, 2 mmol) in anhydrous dichloromethane (6 mL). The desired product was obtained as colorless oil (411 mg, 80% yield) after purification by flash column chromatography on silica gel (0.5% Et<sub>3</sub>N in petroleum ether: ethyl acetate = 1:1).

<sup>1</sup>H NMR (400 MHz, CDCl<sub>3</sub>) δ 8.36 (d, *J* = 4.6 Hz, 1H), 7.39 (d, *J* = 7.5 Hz, 1H), 7.29 - 6.91 (m, 9H), 4.06 (q, *J* = 7.2 Hz, 2H), 3.42 - 3.27 (m, 2H), 2.88 - 2.60 (m, 5H), 2.59 - 2.50 (m, 1H), 2.48 - 2.36 (m, 2H), 2.33 - 1.88 (m, 9H), 1.21 (t, *J* = 7.2 Hz, 3H). <sup>13</sup>C NMR (101 MHz, CDCl<sub>3</sub>) δ 173.4, 157.8, 146.7, 140.0, 139.6, 139.5, 138.0, 137.3, 133.5, 132.7, 132.4, 131.0, 130.0, 129.4, 129.0, 128.3, 126.1, 122.1, 62.4, 60.3, 55.7, 55.0, 39.2, 38.0, 35.0, 32.0, 31.6, 31.2, 31.0, 14.4. HRMS (ESI) calcd for C<sub>32</sub>H<sub>36</sub>ClN<sub>2</sub>O<sub>2</sub> [M + H]<sup>+</sup> *m/z* = 515.2460, found: 515.2461. IR *v*<sub>max</sub>/cm<sup>-1</sup> (film): 2924, 1730, 1477, 1437, 1371, 1150, 1029, 829, 744, 700.

### ethyl

### 3-benzyl-4-((3-(10,11-dihydro-5H-dibenzo[a,d][7]annulen-5-ylidene)propyl)(methyl)amino)butanoate (76)

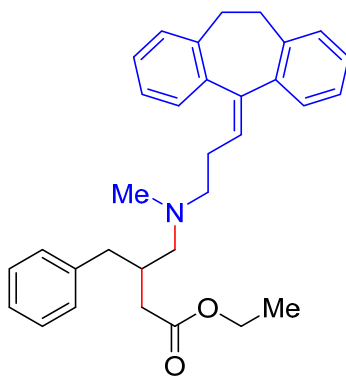

Prepared following the general procedure employing 3-(10,11-dihydro-5H-dibenzo[a,d][7]annulen-5-ylidene)-N-methylpropan-1-amine (263 mg, 1 mmol), 3-phenylpropanal (201 mg, 1.5 mmol), ethyl 2-mercaptoacetate (180 mg, 1.5 mmol), triphenylphosphine (393 mg, 1.5 mmol), 4Å MS (1 g), di-tert-butyl peroxide (292 mg, 2 mmol) in anhydrous dichloromethane (6 mL). The desired product was obtained as colorless oil (397 mg, 85% yield) after purification by flash column chromatography on silica gel (0.5% Et<sub>3</sub>N in petroleum ether: ethyl acetate = 3:1).

$^1\text{H}$  NMR (400 MHz,  $\text{CDCl}_3$ )  $\delta$  7.50 - 6.91 (m, 13H), 5.93 (t,  $J = 7.4$  Hz, 1H), 4.05 (q,  $J = 7.0$  Hz, 2H), 3.55 - 2.93 (m, 4H), 2.91 - 2.67 (m, 2H), 2.61 - 2.20 (m, 8H), 2.18 (s, 3H), 2.04 - 1.78 (m, 1H), 1.23 (t,  $J = 7.1$  Hz, 3H).  $^{13}\text{C}$  NMR (101 MHz,  $\text{CDCl}_3$ )  $\delta$  173.3, 143.4, 141.5, 140.2, 140.0, 139.4, 137.1, 130.0, 129.8, 129.4, 128.6, 128.3, 128.3, 128.1, 127.4, 127.0, 126.0, 126.0, 125.8, 61.7, 60.1, 58.0, 42.3, 38.9, 37.3, 35.6, 33.8, 32.2, 27.5, 14.3. HRMS (ESI) calcd for  $\text{C}_{32}\text{H}_{38}\text{NO}_2$   $[\text{M} + \text{H}]^+$   $m/z = 468.2897$ , found: 468.2897. IR  $\nu_{\text{max}}/\text{cm}^{-1}$  (film): 3024, 2934, 1731, 1495, 1485, 1453, 1371, 1158, 1037, 768, 754, 700.

### Modified Haloperidol (77)

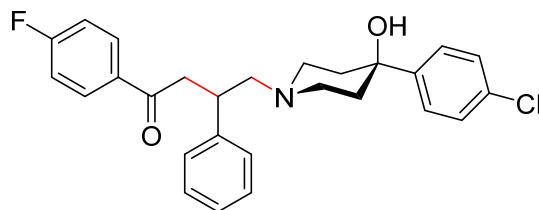

Prepared following the general procedure employing 4-(4-chlorophenyl)piperidin-4-ol (211 mg, 1 mmol), 2-phenylacetaldehyde (180 mg, 1.5 mmol), 1-(4-fluorophenyl)-2-mercaptoethan-1-one (255 mg, 1.5 mmol), triphenylphosphine (393 mg, 1.5 mmol), 4Å MS (1 g), di-tert-butyl peroxide (292 mg, 2 mmol) in anhydrous dichloromethane (6 mL). The desired product was obtained as colorless oil (248 mg, 55% yield) after purification by flash column chromatography on silica gel (0.5%  $\text{Et}_3\text{N}$  in petroleum ether: ethyl acetate = 1:2).

$^1\text{H}$  NMR (400 MHz,  $\text{CDCl}_3$ )  $\delta$  8.03 (dd,  $J = 8.7, 5.5$  Hz, 2H), 7.34 - 7.08 (m, 11H), 3.86 - 3.68 (m, 1H), 3.56 (dd,  $J = 15.2, 8.3$  Hz, 1H), 3.05 - 2.73 (m, 2H), 2.73 - 2.41 (m, 4H), 2.36 - 2.21 (m, 1H), 1.73 (br, 1H), 1.65 - 1.36 (m, 4H).  $^{13}\text{C}$  NMR (101 MHz,  $\text{CDCl}_3$ )  $\delta$  196.6, 165.6 (d,  $J = 254.3$  Hz), 146.9, 143.3, 134.6, 132.8, 130.9 (d,  $J = 9.1$  Hz), 128.8, 128.4, 127.7, 126.9, 126.1, 115.7 (d,  $J = 21.7$  Hz), 71.0, 51.2, 48.1, 43.3, 40.4, 37.9.  $^{19}\text{F}$  NMR (376 MHz,  $\text{CDCl}_3$ )  $\delta$  -106.2 (s). HRMS (ESI) calcd for  $\text{C}_{27}\text{H}_{28}\text{ClFNO}_2$   $[\text{M} + \text{H}]^+$   $m/z = 452.1787$ , found: 452.1792. IR  $\nu_{\text{max}}/\text{cm}^{-1}$  (film): 3441, 3028, 2922, 2817, 1727, 1673, 1596, 1491, 1451, 1406, 1372, 1299, 1231, 1155, 1094, 1042, 1011, 914, 838, 760, 700.

### 1,3,3-trimethyl-2-(methylene- $d_2$ )indoline (79)

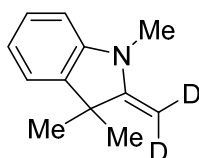

This compound is prepared by dissolving 1,3,3-trimethyl-2-methyleneindoline in  $\text{D}_2\text{O}$ .

$^1\text{H}$  NMR (400 MHz,  $\text{CDCl}_3$ )  $\delta$  7.19 - 7.03 (m, 2H), 6.76 (t,  $J = 7.4$  Hz, 1H), 6.54 (d,  $J = 7.8$  Hz, 1H), 3.04 (s, 3H), 1.35 (s, 6H).  $^{13}\text{C}$  NMR (101 MHz,  $\text{CDCl}_3$ )  $\delta$  162.9, 146.6, 137.7, 127.7, 121.9, 118.5, 105.0, 73.9 - 71.4 (m), 44.2, 30.1, 28.9.

### ethyl 3-(1,3,3-trimethylindolin-2-yl) propanoate (80a)

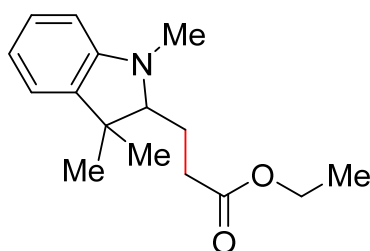

Prepared following the general procedure employing 1, 3, 3-trimethyl-2-methyleneindoline (173 mg, 1 mmol), ethyl 2-mercaptoacetate (180 mg, 1.5 mmol), triphenylphosphine (393 mg, 1.5 mmol), di-tert-butyl peroxide (292 mg, 2 mmol) in anhydrous dichloromethane (6 mL). The desired product was obtained as brown oil (222 mg, 85% yield) after purification by flash column chromatography on silica gel (0.5% Et<sub>3</sub>N in dichloromethane).

<sup>1</sup>H NMR (400 MHz, CDCl<sub>3</sub>) δ 7.10 (m, 1H), 7.02 (dd, *J* = 7.3, 0.9 Hz, 1H), 6.75 (td, *J* = 7.4, 0.8 Hz, 1H), 6.52 (d, *J* = 7.8 Hz, 1H), 4.18 (q, *J* = 7.1 Hz, 2H), 2.86 (dd, *J* = 8.3, 4.1 Hz, 1H), 2.77 (s, 3H), 2.62 - 2.42 (m, 2H), 2.24 - 2.10 (m, 1H), 2.09 - 1.94 (m, 1H), 1.38 (s, 3H), 1.30 (t, *J* = 7.1 Hz, 3H), 1.13 (s, 3H). <sup>13</sup>C NMR (101 MHz, CDCl<sub>3</sub>) δ 173.3, 151.6, 139.1, 127.6, 121.5, 118.6, 107.9, 76.0, 60.6, 43.1, 34.9, 31.8, 27.6, 23.7, 23.5, 14.4. HRMS (ESI) calcd for C<sub>16</sub>H<sub>24</sub>NO<sub>2</sub> [M + H]<sup>+</sup> *m/z* = 262.1802, found:262.1807. IR *v*<sub>max</sub>/cm<sup>-1</sup> (film): 2960, 1734, 1605, 1484, 1459, 1368, 1300, 1184, 1022, 741.

**ethyl 3-(1,3,3-trimethylindolin-2-yl-2-*d*)propanoate-3,3-*d*<sub>2</sub> (80)**

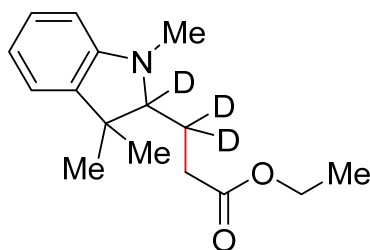

Prepared following the general procedure employing 1,3,3-trimethyl-2-(methylene-*d*<sub>2</sub>)indoline (175 mg, 1 mmol), ethyl 2-mercaptoacetate (180 mg, 1.5 mmol), triphenylphosphine (393 mg, 1.5 mmol), di-tert-butyl peroxide (292 mg, 2 mmol) in dichloromethane/D<sub>2</sub>O (6 mL, *v/v*=4:2). The desired product was obtained as brown oil (238 mg, 92% yield, 90% D-incorporation) after purification by flash column chromatography on silica gel (0.5% Et<sub>3</sub>N in dichloromethane).

<sup>1</sup>H NMR (400 MHz, CDCl<sub>3</sub>) δ 7.11 (t, *J* = 7.6 Hz, 1H), 7.02 (d, *J* = 7.3 Hz, 1H), 6.75 (t, *J* = 7.4 Hz, 1H), 6.52 (d, *J* = 7.8 Hz, 1H), 4.18 (q, *J* = 7.1 Hz, 2H), 2.77 (s, 3.1H), 2.50 (dd, *J* = 35.8, 16.0 Hz, 2H), 1.38 (s, 3H), 1.30 (t, *J* = 7.1 Hz, 3H), 1.13 (s, 3H). <sup>13</sup>C NMR (101 MHz, CDCl<sub>3</sub>) δ 173.2, 151.6, 151.5, 139.1, 127.5, 121.5, 118.5, 107.8, 76.1 - 74.8 (m), 60.5, 42.9, 34.8, 31.6, 27.5, 23.5, 23.3 - 22.6 (m), 14.3. HRMS (ESI) calcd for C<sub>16</sub>H<sub>21</sub>D<sub>3</sub>NO<sub>2</sub> [M + H]<sup>+</sup> *m/z* = 265.1990, found:265.1997. IR *v*<sub>max</sub>/cm<sup>-1</sup> (film): 2960, 1734, 1605, 1484, 1459, 1368, 1300, 1184, 1116, 1022, 741.

## 6. Scale-up reaction

We did the scale-up reaction for compound **4** to further demonstrate the feasibility of this protocol. The product was isolated in 86% yield on 10 mmol scale according to the general procedure under the sunlight.

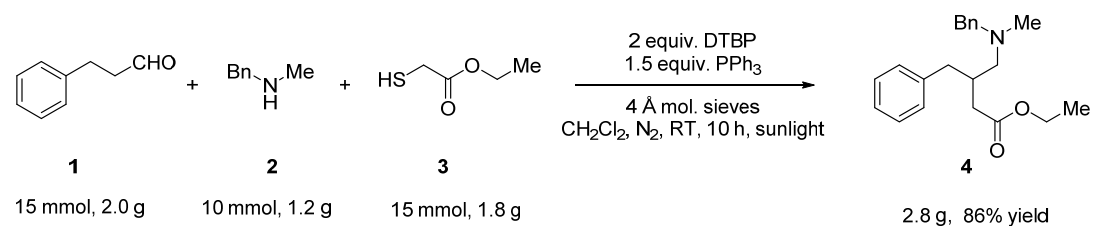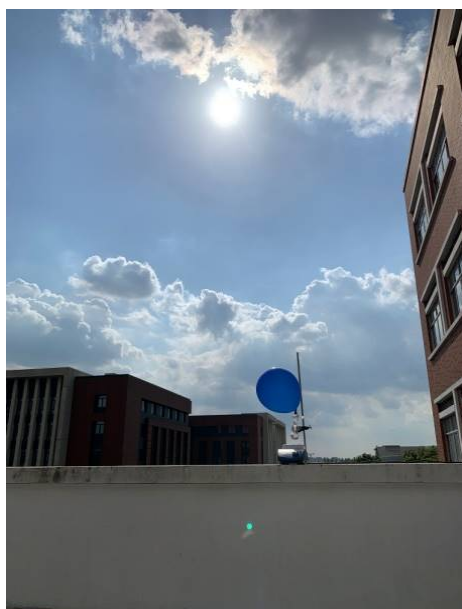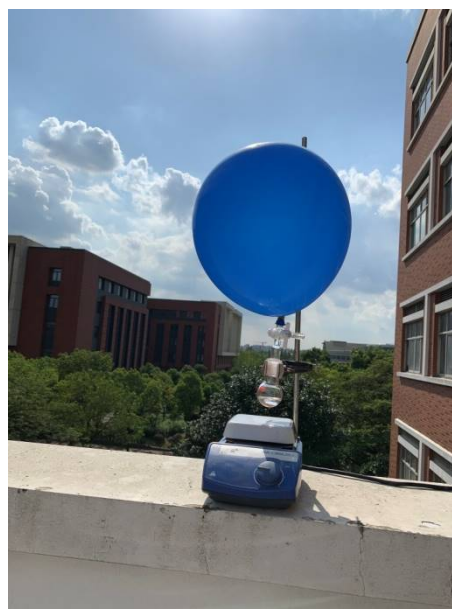

**Supplementary Fig. 3** Experimental set-up for the scale-up reaction under sunlight



## 7. Mechanistic studies

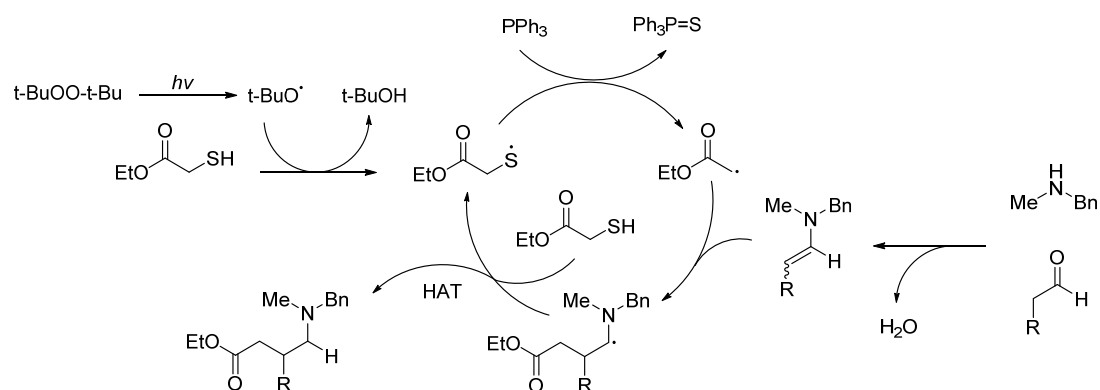

**Supplementary Fig. 4** Proposed mechanism.

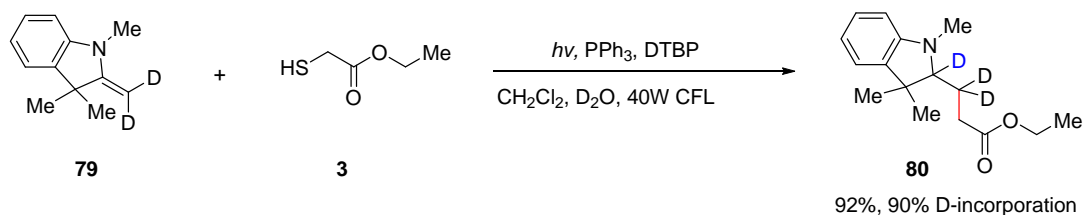

**Supplementary Fig. 5** Deuterium-labelling study

The reaction was performed according to the general procedure employing 1, 3, 3-trimethyl-2-methyleneindoline (173 mg, 1 mmol), ethyl 2-mercaptoacetate (180 mg, 1.5 mmol), triphenylphosphine (393 mg, 1.5 mmol), di-tert-butyl peroxide (292 mg, 2 mmol) in dichloromethane/D<sub>2</sub>O (6 mL, v/v=4:2). The desired product was obtained as brown oil (238 mg, 92% yield, 90% D-incorporation) after purification by flash column chromatography on silica gel (0.5% Et<sub>3</sub>N in dichloromethane).

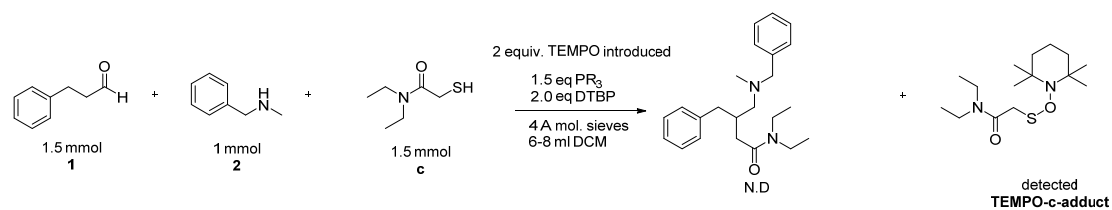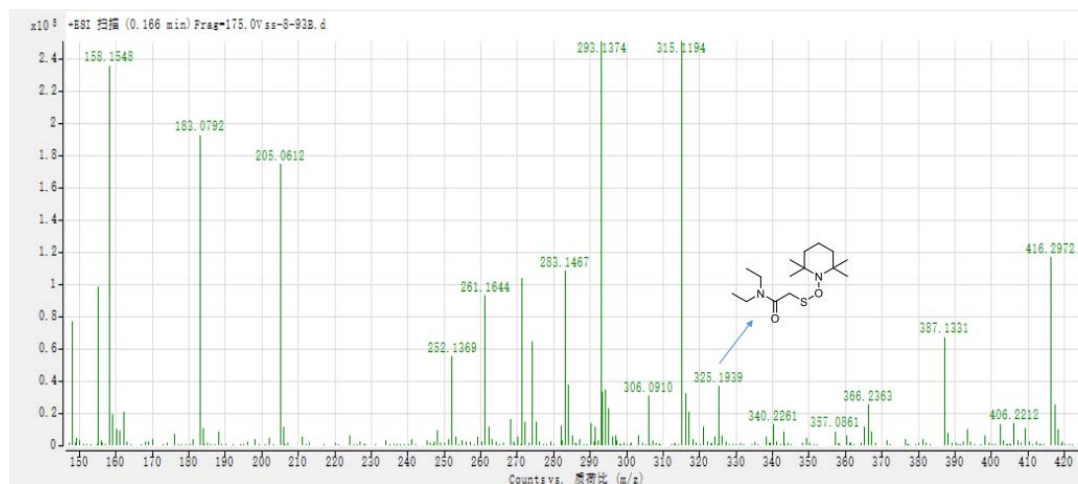

### Supplementary Fig. 6 Radical trapping with TEMPO

The radical trapping experiment was executed as follows: to a 25 ml round-bottom flask equipped with a stir bar was added N-methyl-1-phenylmethanamine (121mg, 1 mmol), 3-phenylpropanal (201 mg, 1.5 mmol), N,N-diethyl-2-mercaptoacetamide (220 mg, 1.5 mmol), triphenylphosphine (393 mg, 1.5 mmol), 4Å MS (1 g), di-tert-butyl peroxide (292 mg, 2 mmol) in anhydrous dichloromethane (6 mL). Then, TEMPO (2.0 mmol) was introduced into the solution. The flask was charged with  $\text{N}_2$  and the reaction was stirred and irradiated using two 40 W household CFL bulb (6 cm away, to keep the reaction at room temperature) at room temperature for 10 hours. After 10 hours, the reaction was monitor by LC-MS. Substrate and TEMPO-c-adduct can be detected in mass spectrometry. However, the product was not found.

## 8. Spectral data

4

ss-8-15B-pure-H-CDC13  
new experiment

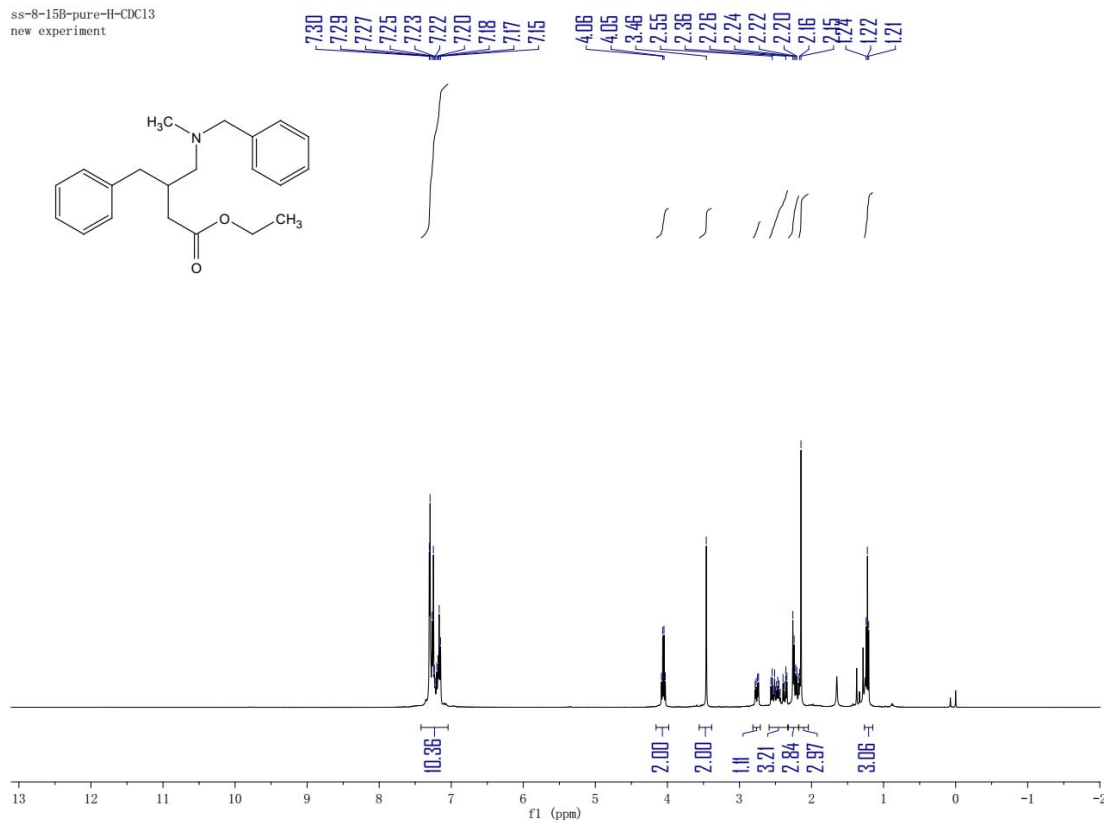

ss-8-15B-pure-C13-CDC13  
new experiment

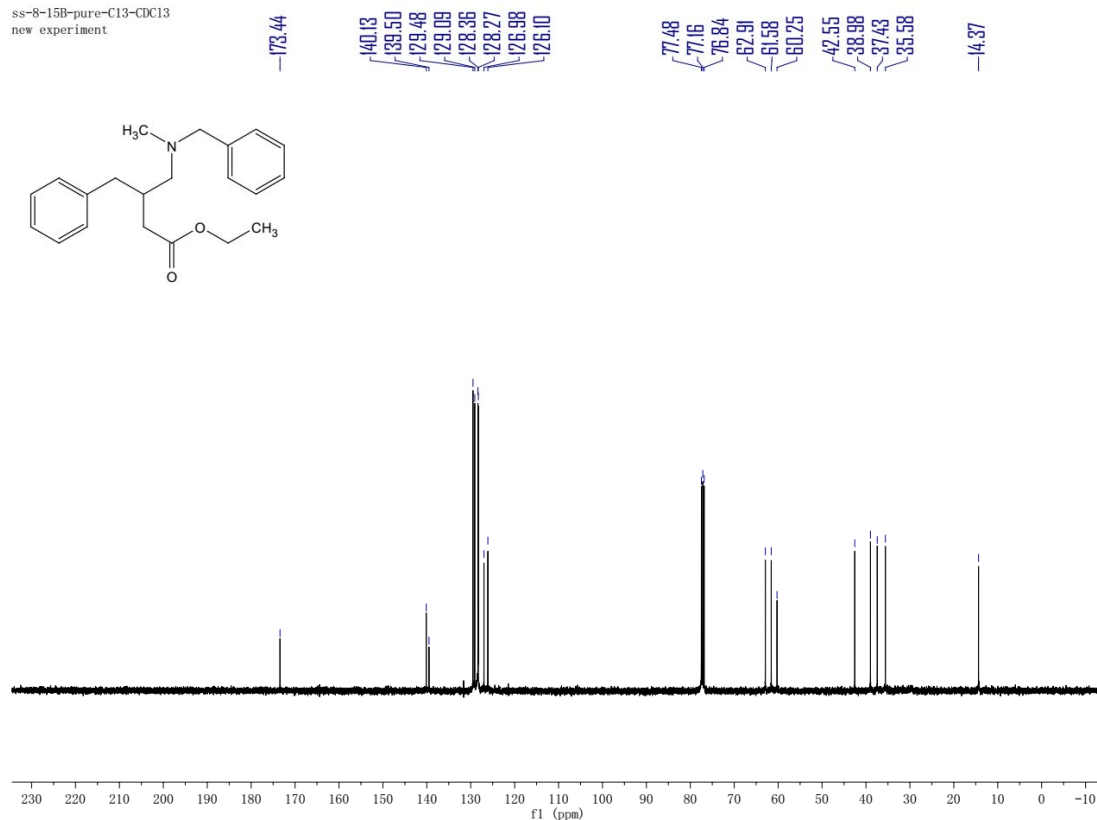

5

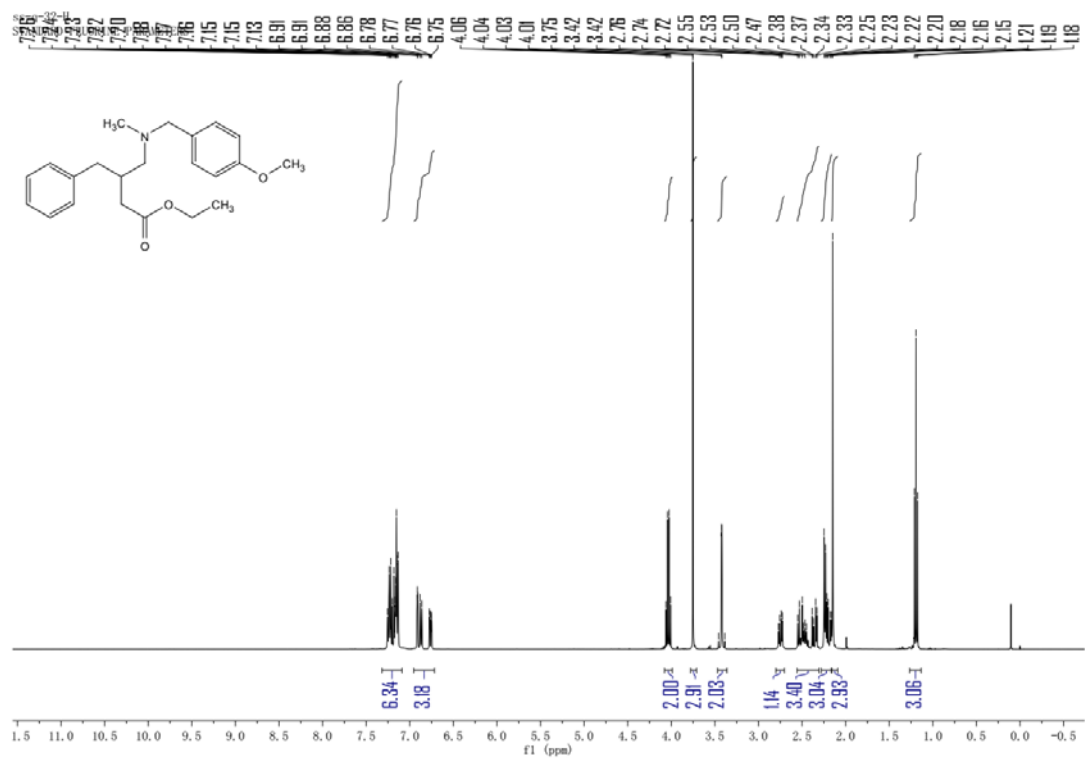

ss-q-32-C  
STANDARD FLUORINE PARAMETERS

173.10, 159.83, 141.08, 139.93, 129.29, 129.03, 128.20, 126.95, 121.19, 117.40, 77.48, 77.16, 76.84, 62.80, 61.45, 60.00, 55.02, 42.46, 38.83, 37.25, 35.45, 14.20

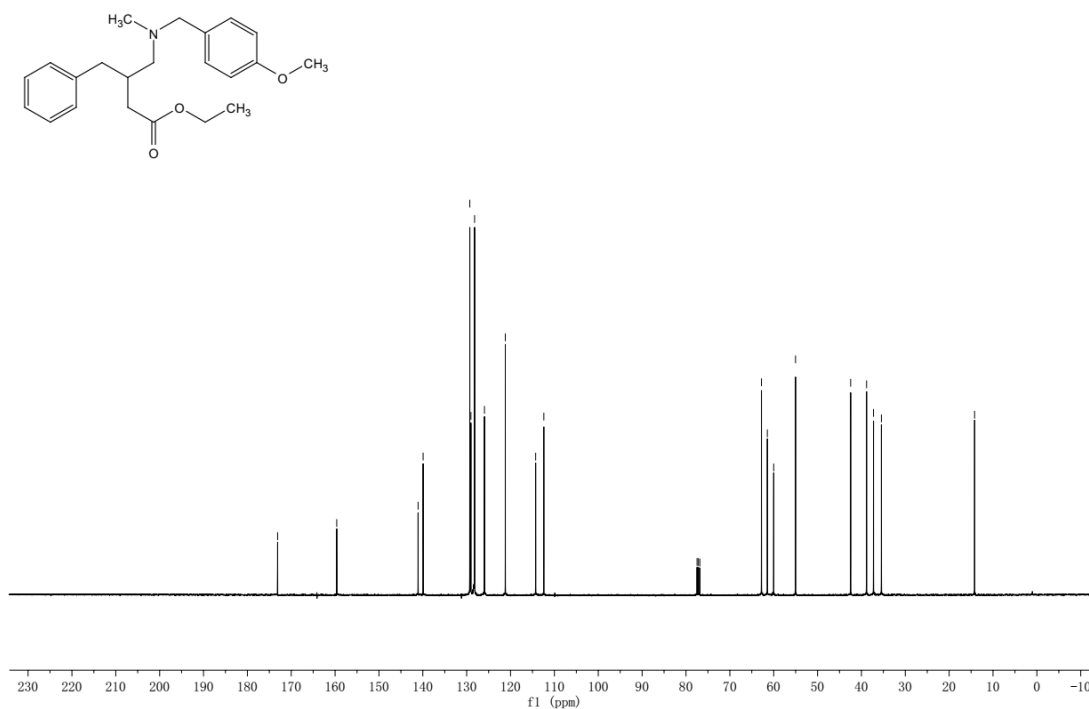

6

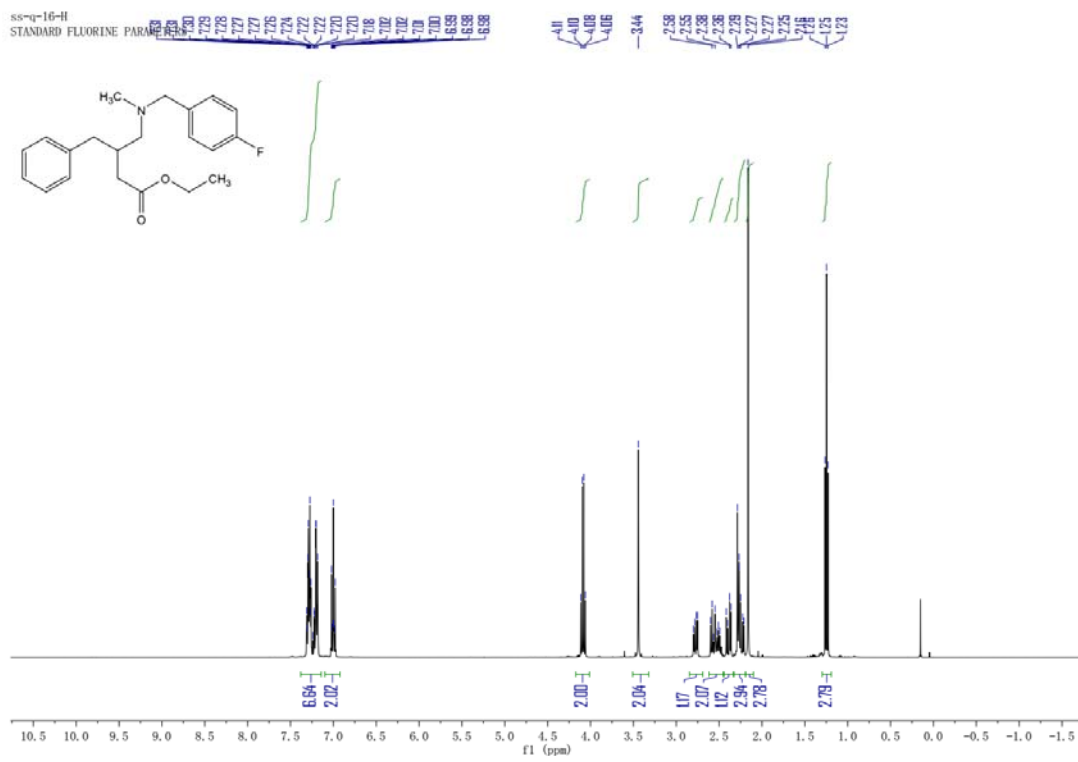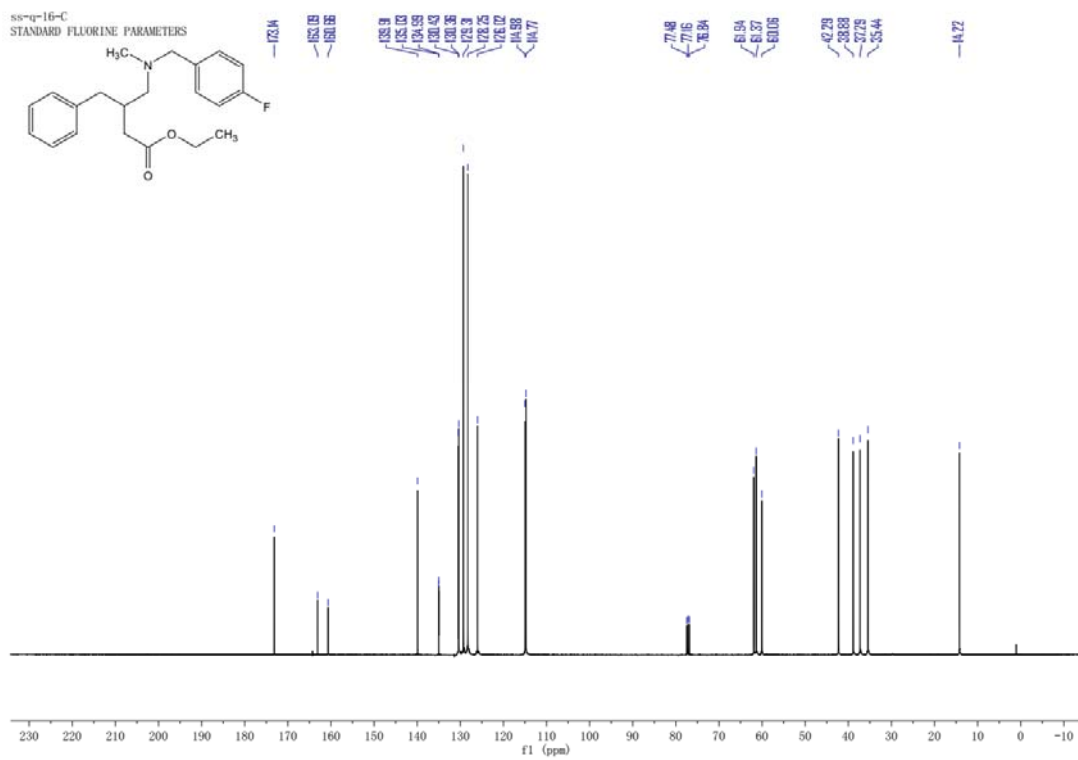

q-ss-16-F19  
STANDARD FLUORINE PARAMETERS

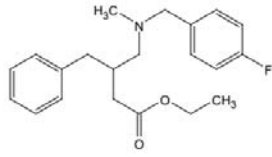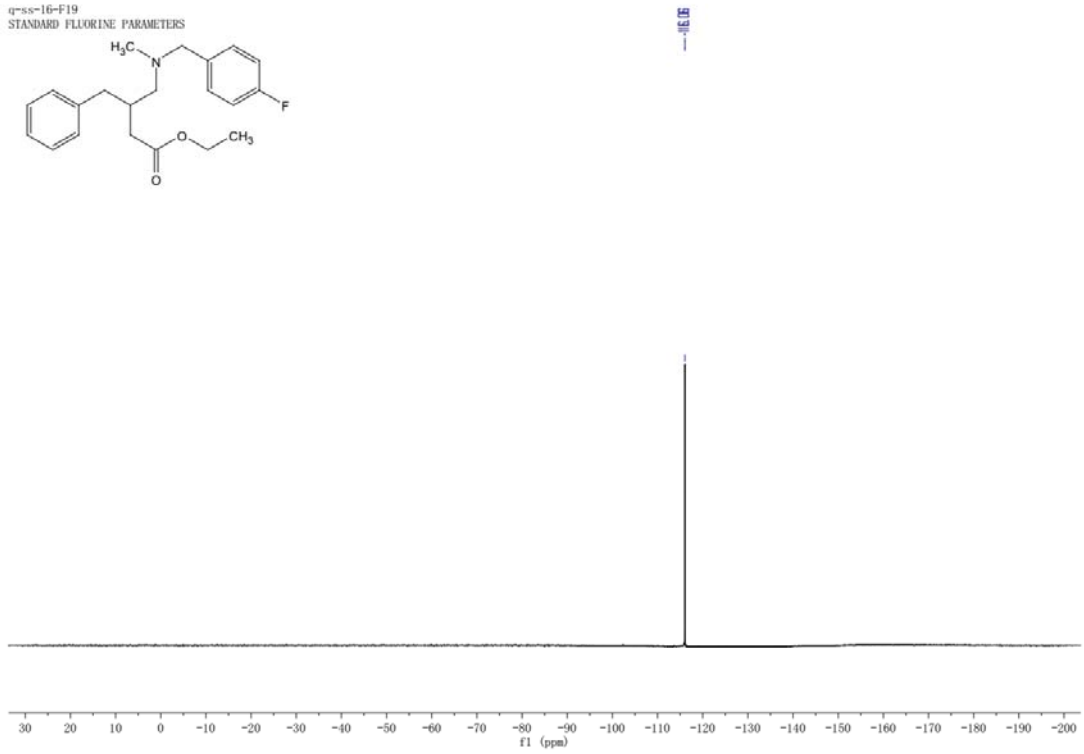

7

ss-q-30-H  
STANDARD FLUORINE PARAMETERS

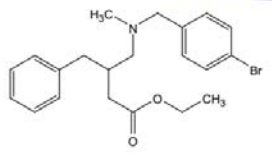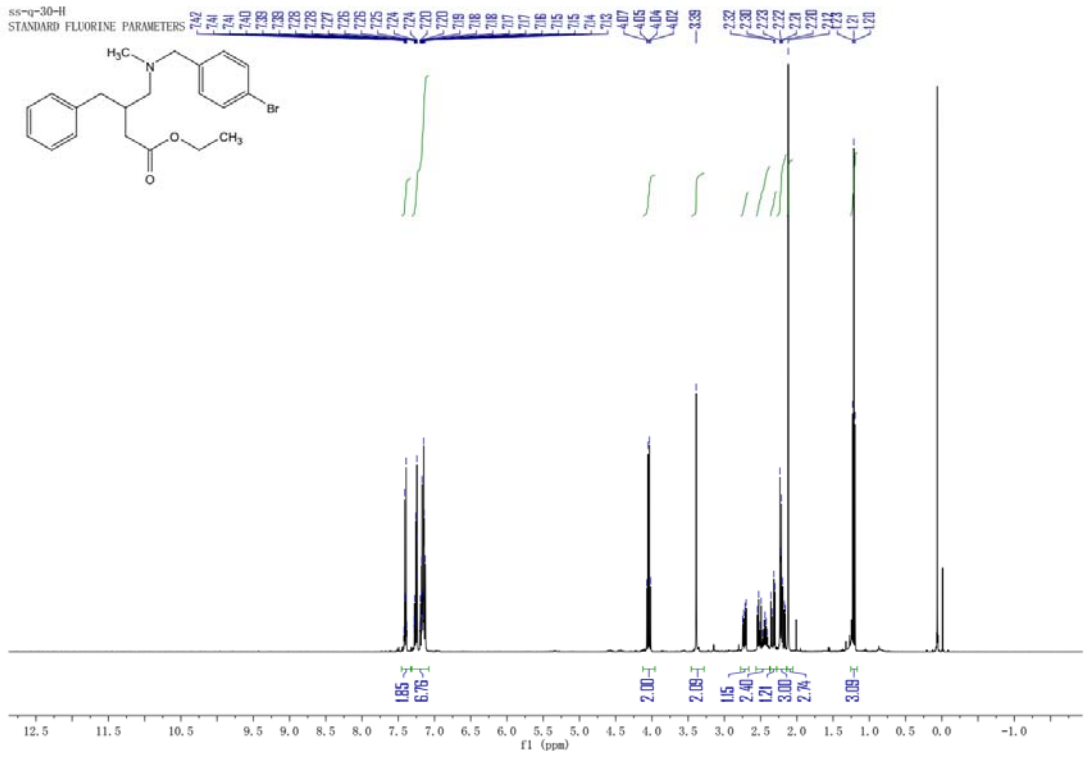

ss-q-30-C  
STANDARD FLUORINE PARAMETERS

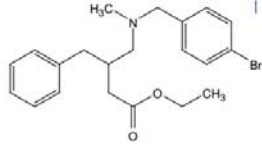

140.03  
138.55  
137.77  
137.76  
136.43  
133.40  
133.16  
120.76

71.48  
71.6  
75.84

62.21  
61.58  
61.77

47.53  
38.02  
27.45  
25.58

-14.37

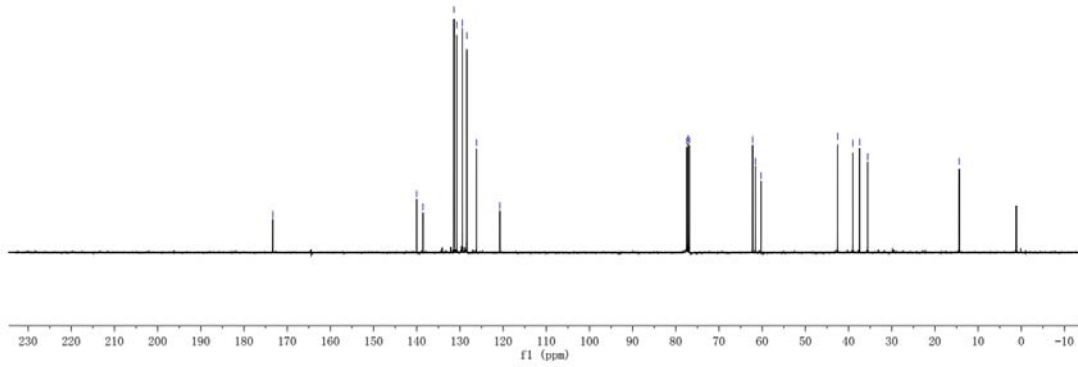

8

ss-q-27-C  
STANDARD

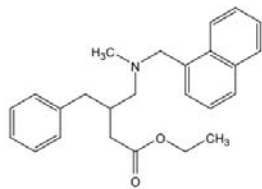

140.03  
138.55  
137.77  
137.76  
136.43  
133.40  
133.16  
120.76  
71.48  
71.6  
75.84  
62.21  
61.58  
61.77  
47.53  
38.02  
27.45  
25.58  
-14.37

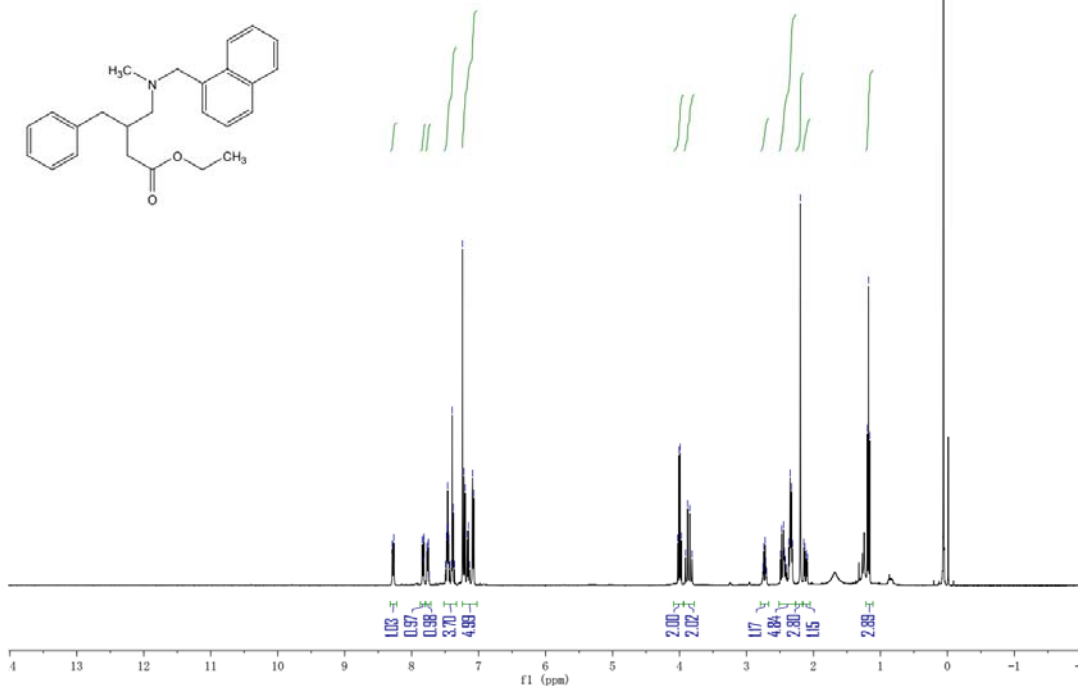

ss-u-27-C  
 Calibration for ATB on 08Jun2020  
 Sample : C13 enriched CH3I in CDC13

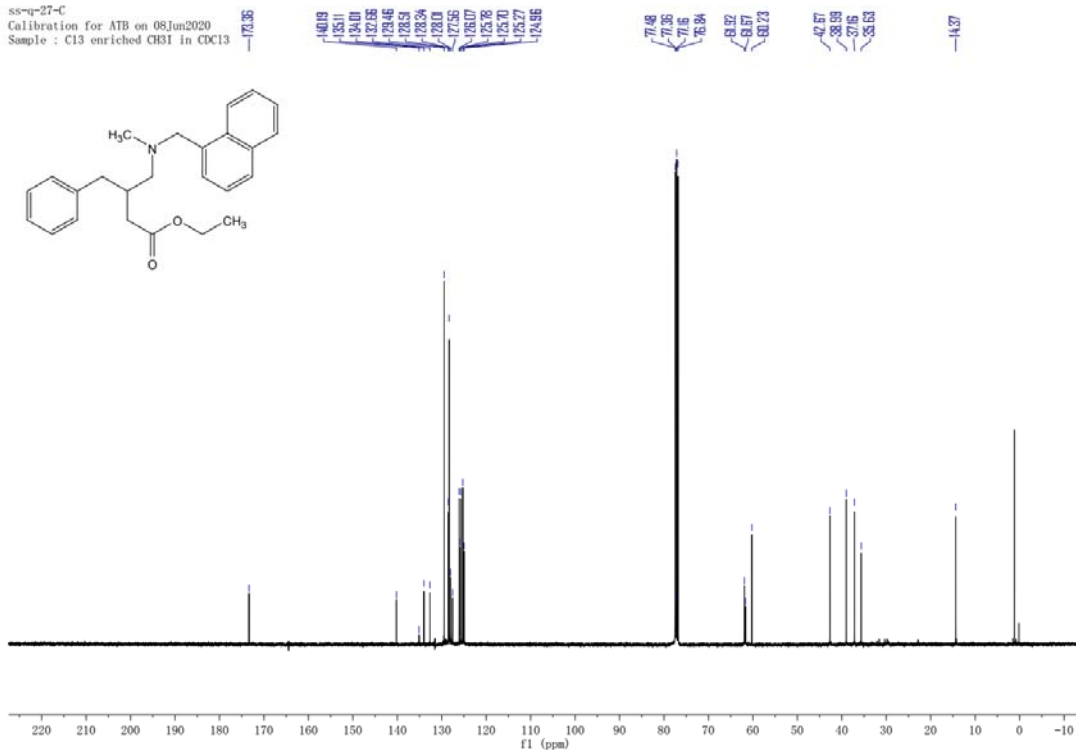

9

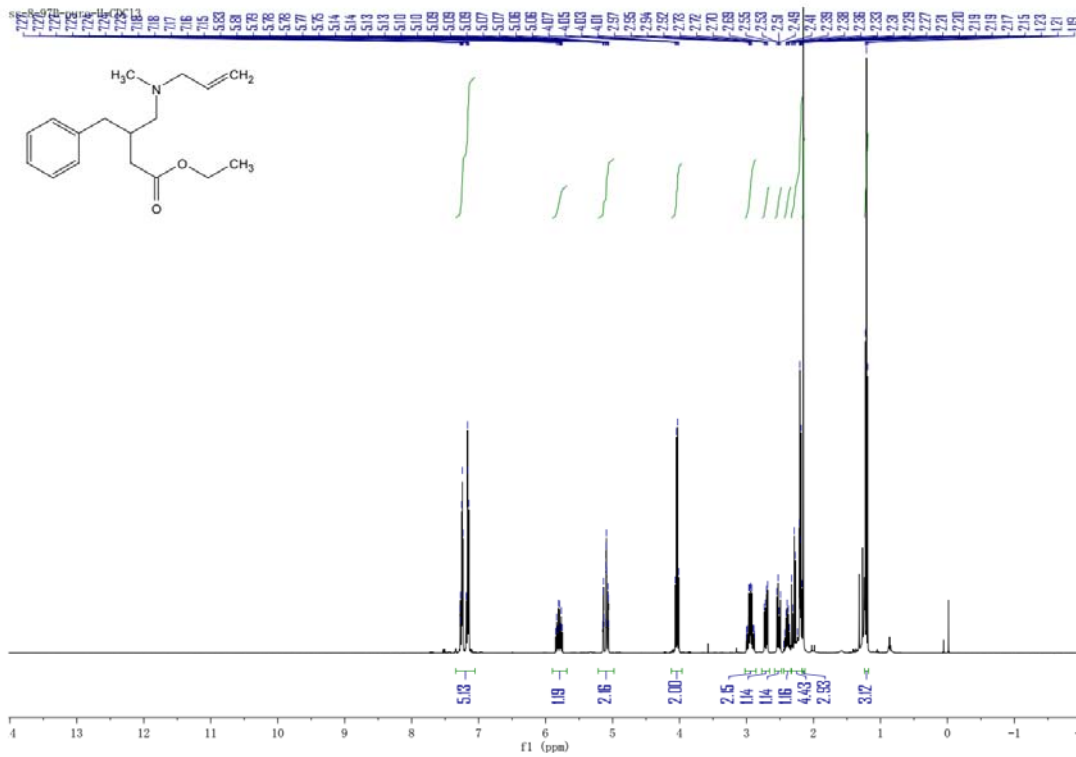



ss-8-97B-pure-C13-CDCl3

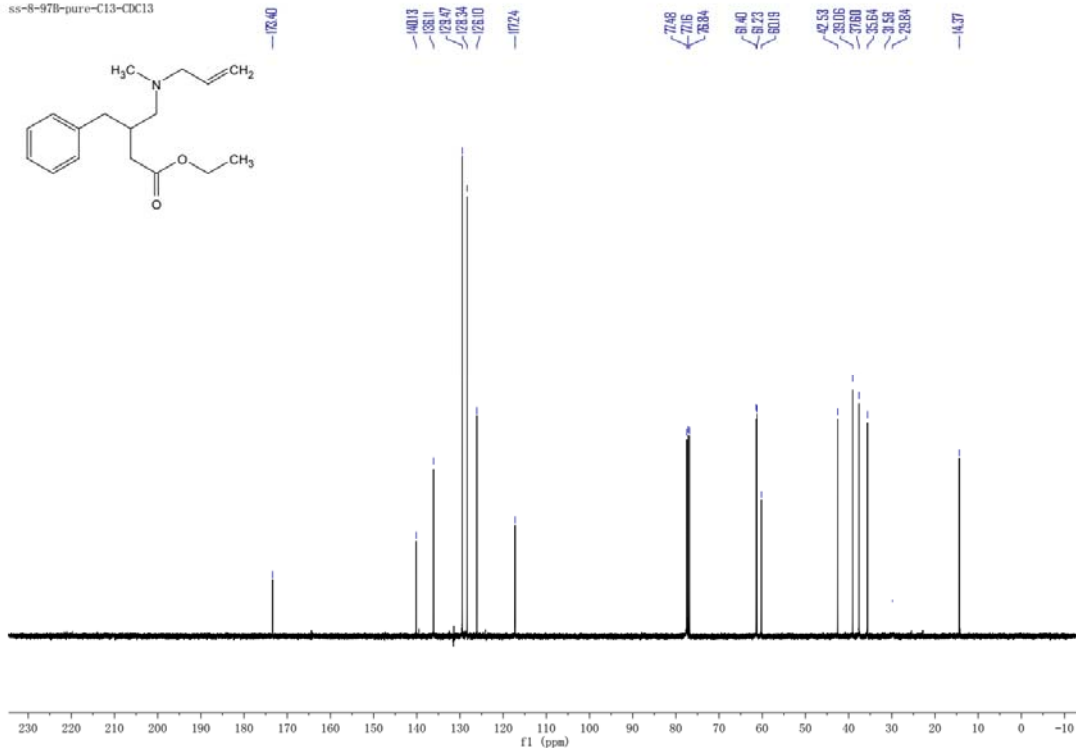

10

ss-q-17-H  
STANDARD FLUORINE PARAMETERS

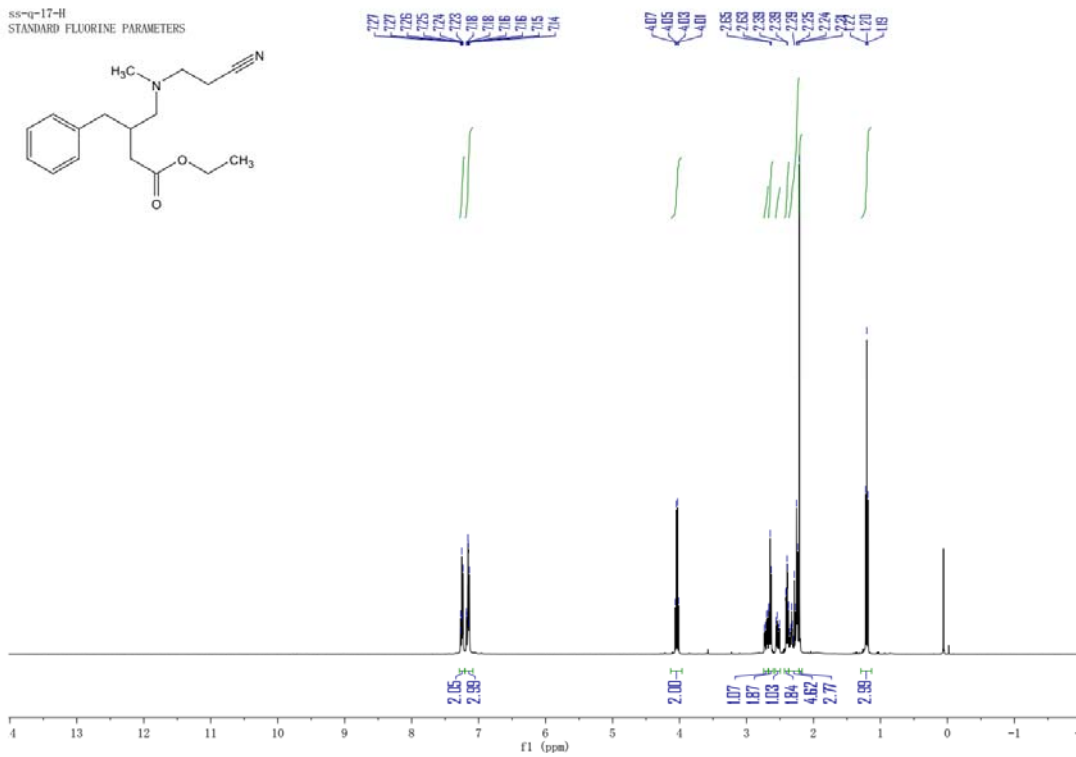

ss-q-17-C  
STANDARD FLUORINE PARAMETERS

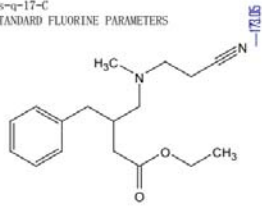

131.63  
131.26  
128.28  
126.08  
18.95  
71.48  
71.16  
70.84  
61.97  
61.03  
53.75  
41.92  
39.65  
38.92  
38.53  
15.95  
14.27

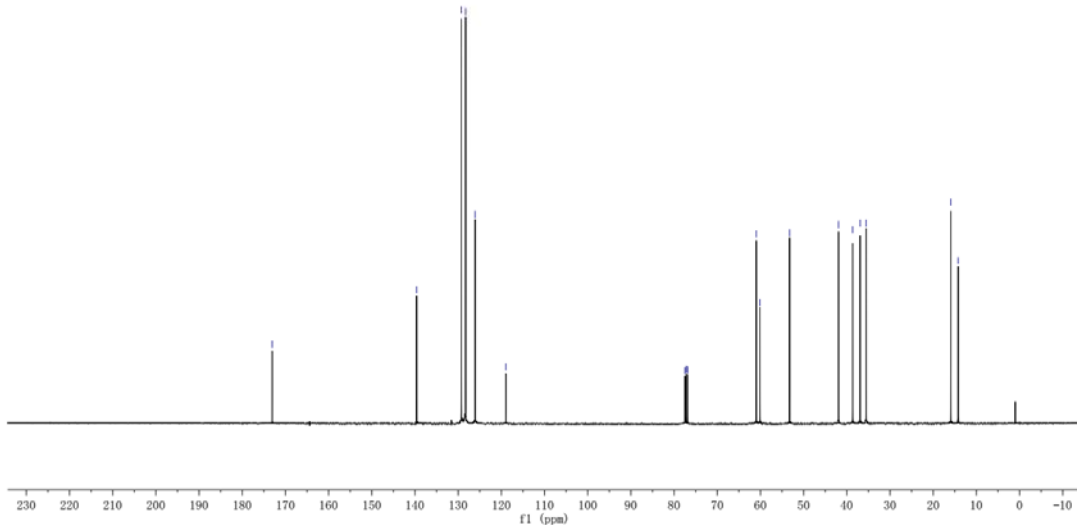

11

May29-2020-liruining  
ss-13-h-1

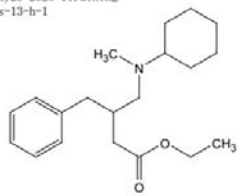

7.21  
7.16  
7.06  
7.02  
7.01  
7.00  
7.00  
4.00  
3.98  
3.95  
3.94  
2.98  
2.95  
2.94  
2.93  
2.90  
2.88  
2.86  
2.77  
2.76  
2.25  
2.23  
2.21  
2.11  
2.09  
1.69  
1.63  
1.51  
1.04  
1.03  
0.99

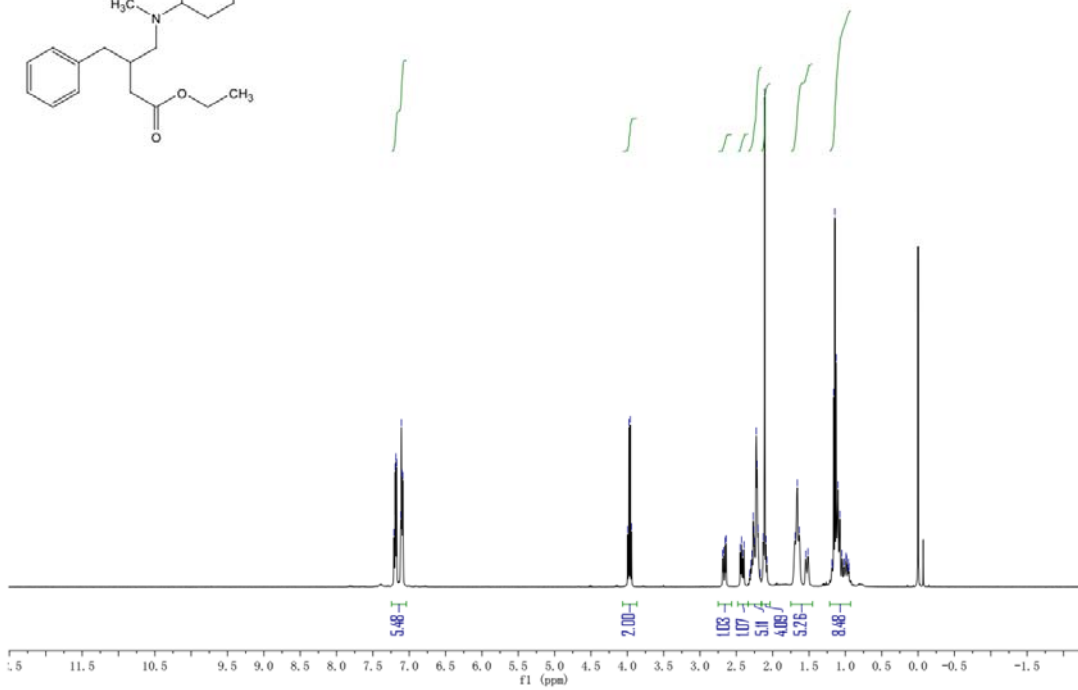

May28-2020-liruining  
ss-13-c

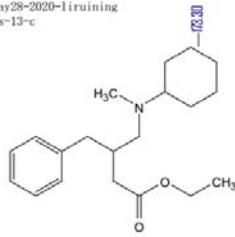

140.28  
129.24  
128.15  
125.94  
77.46  
77.16  
76.84  
52.48  
52.07  
37.88  
33.00  
32.79  
32.57  
32.39  
28.40  
28.43  
17.81  
-14.20

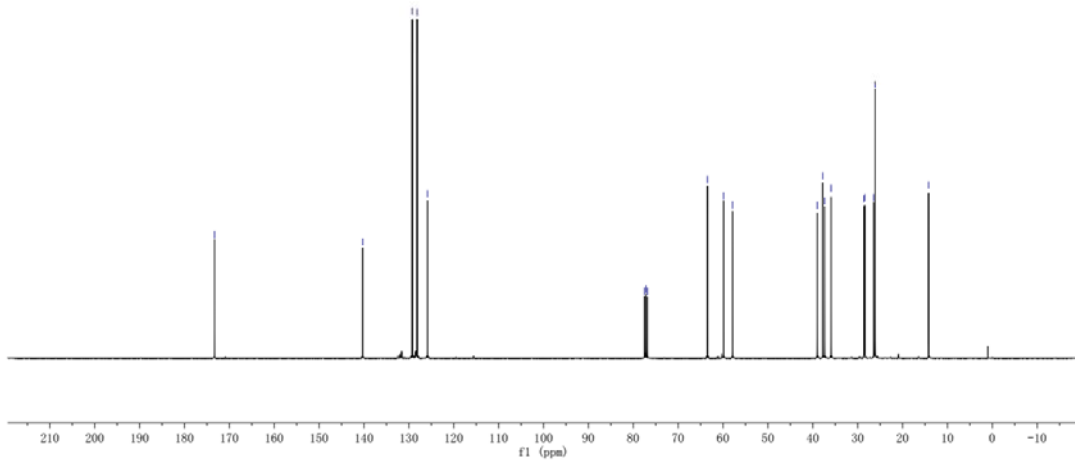

12

ss-8-22-pure-II-CDCl3  
STANDARD FLUORINE PARAMETERS

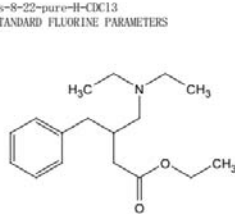

7.27  
7.25  
7.25  
7.23  
7.07  
7.06  
7.04  
4.05  
4.04  
4.03  
4.03  
2.50  
2.48  
2.46  
2.44  
2.33  
2.27  
2.27  
2.27  
1.20  
1.13  
0.95  
0.94  
0.92

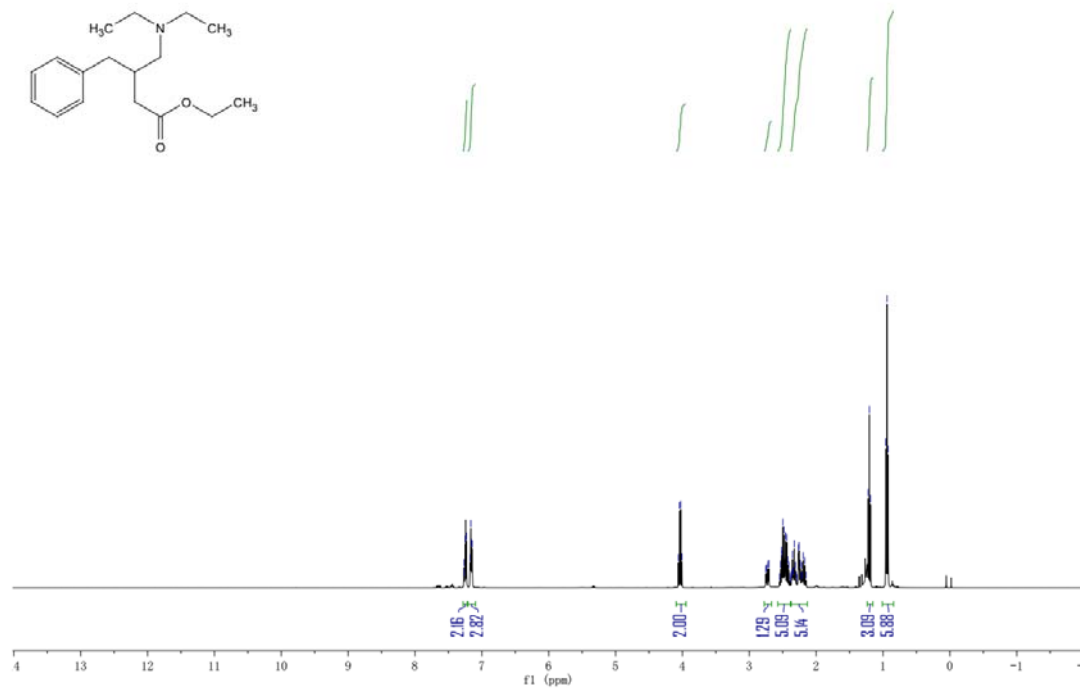

ss-8-22-pure-C13-CDCl3  
STANDARD FLUORINE PARAMETERS

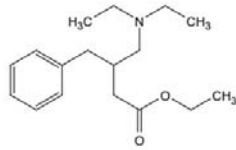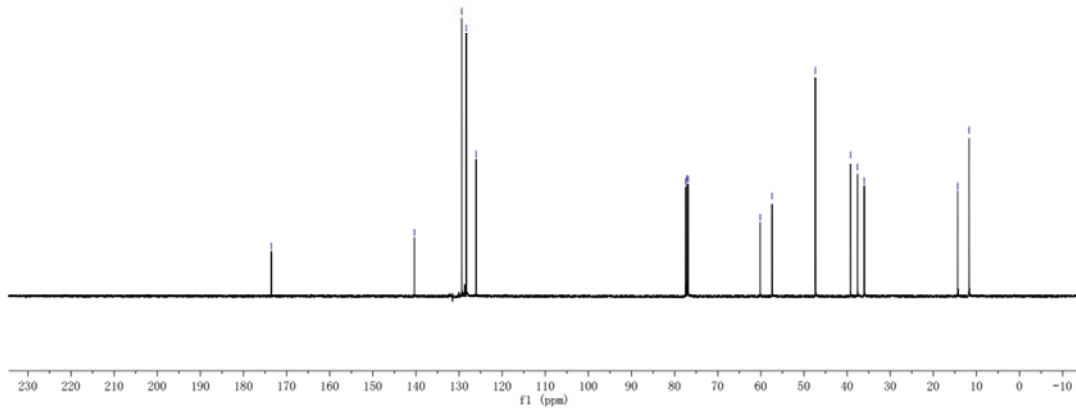

13

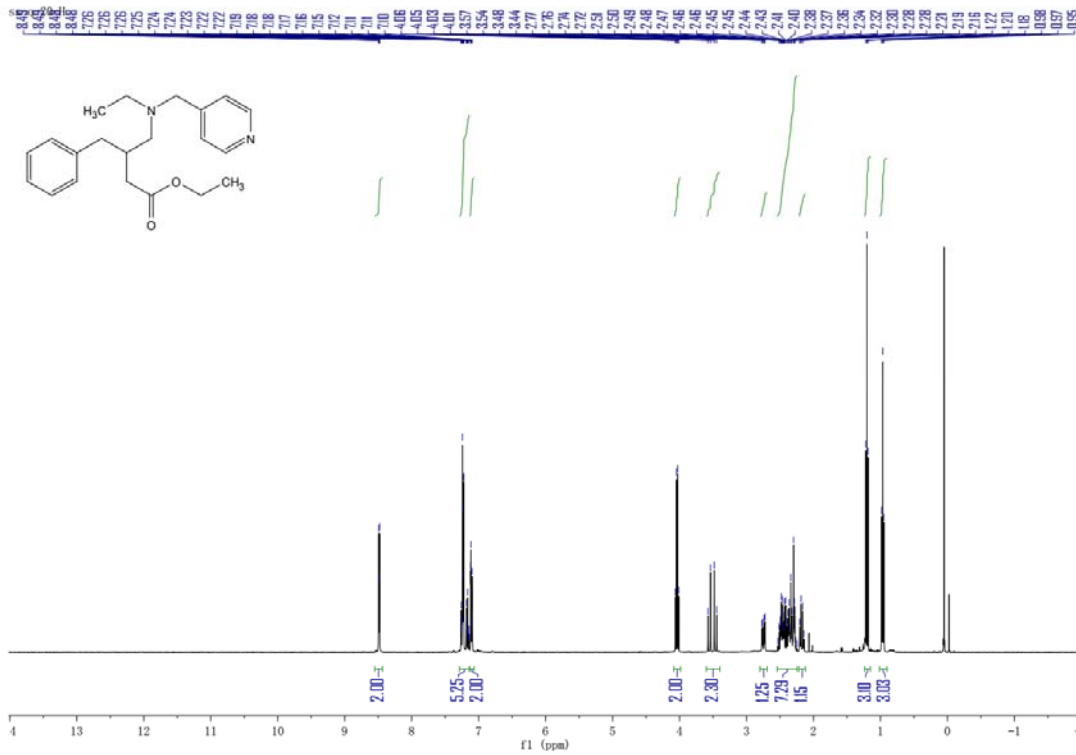



ss-q-42-C  
STANDARD FLUORINE PARAMETERS

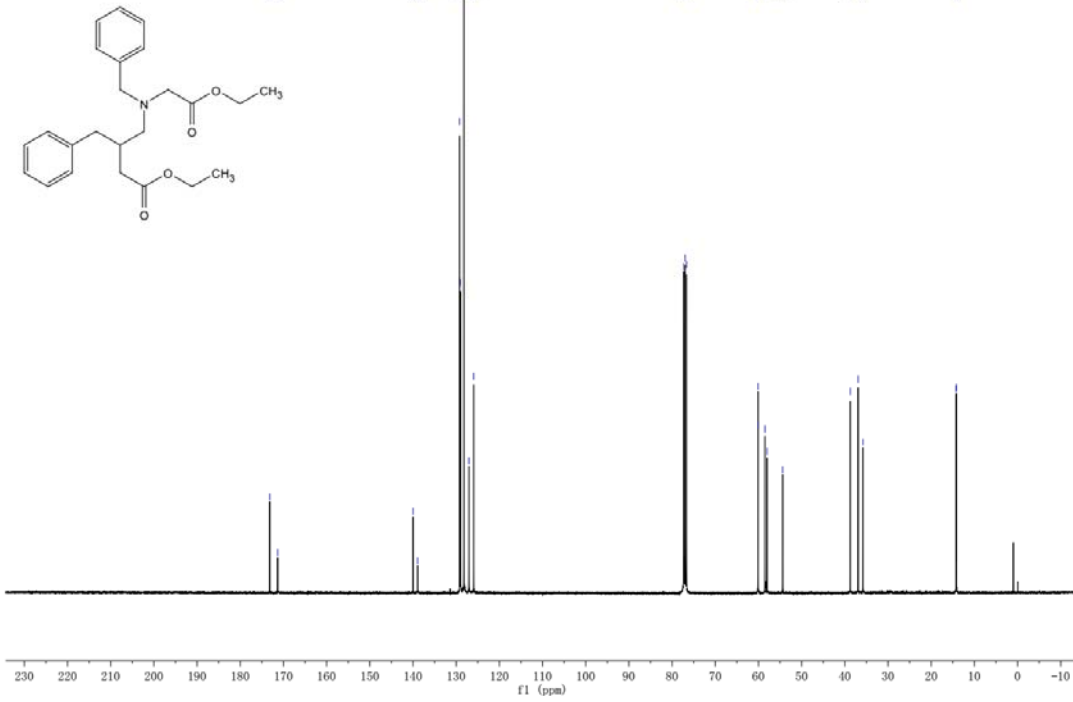

15

May27-2020-liruining  
10-h

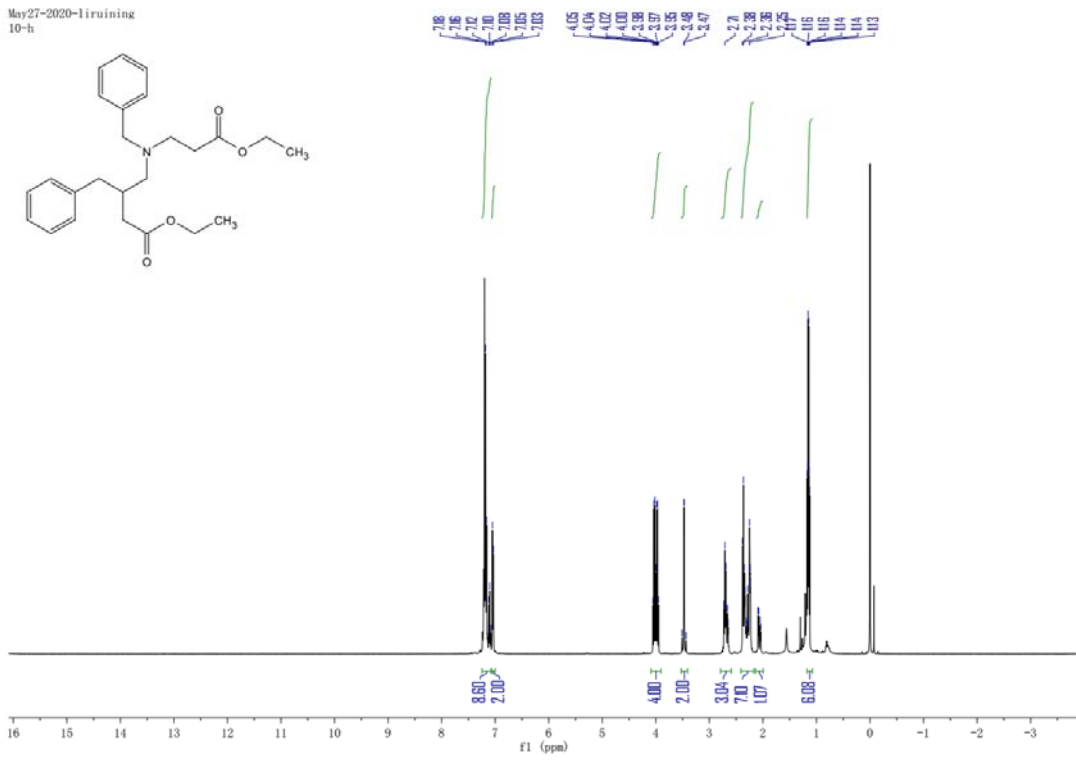

May27-2020-liruining  
10-c

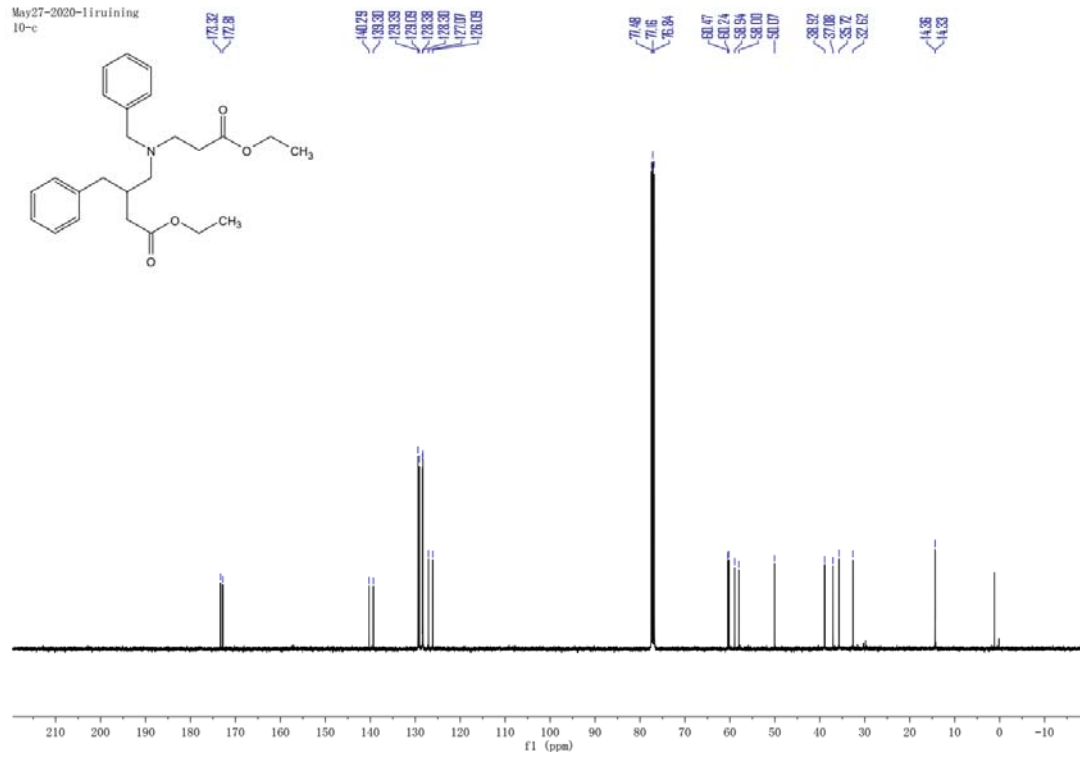

16

ss-q-3-H  
STANDARD FLUORINE PARAMETERS

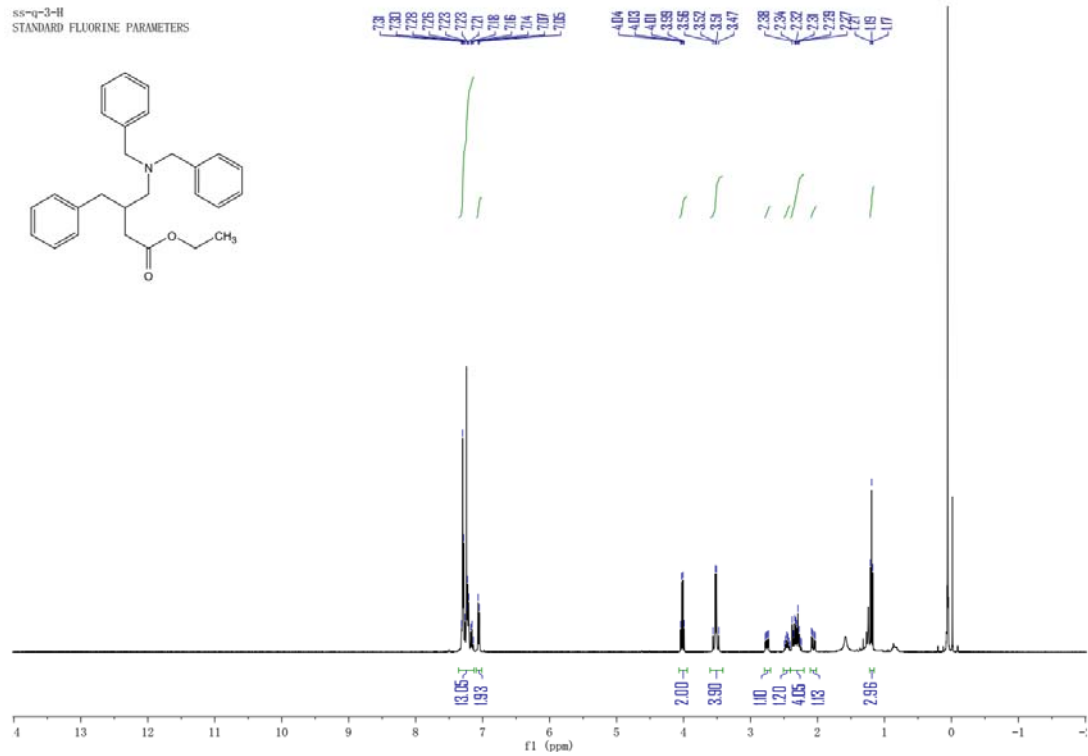

ss-q-3-C  
STANDARD FLUORINE PARAMETERS

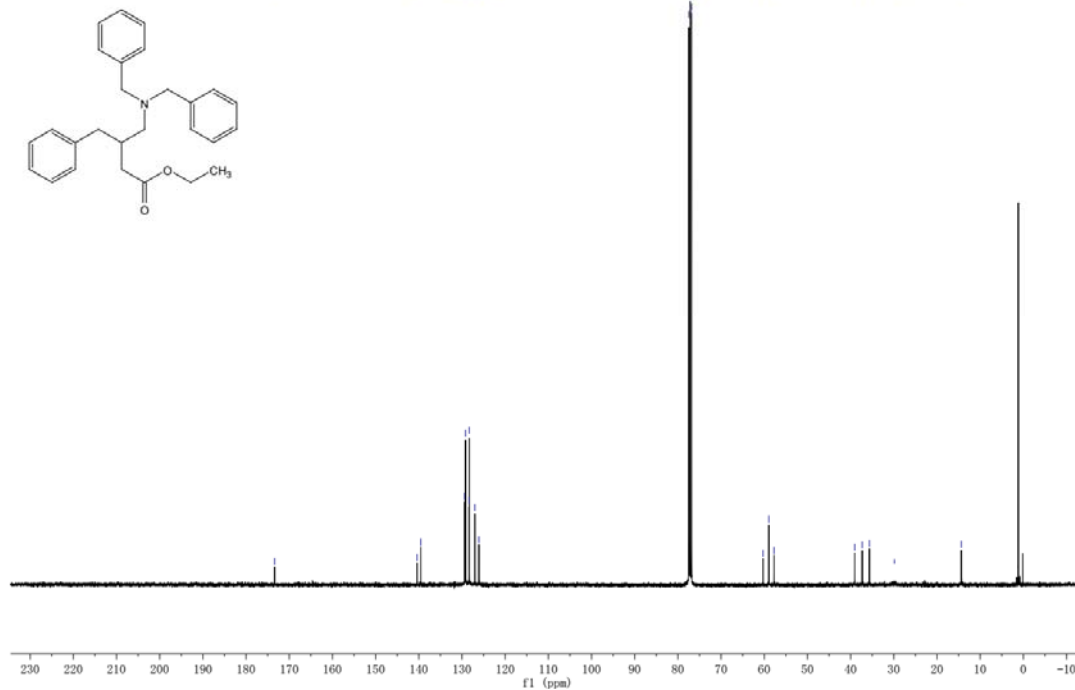

17

May29-2020-liruining  
ss-11-2

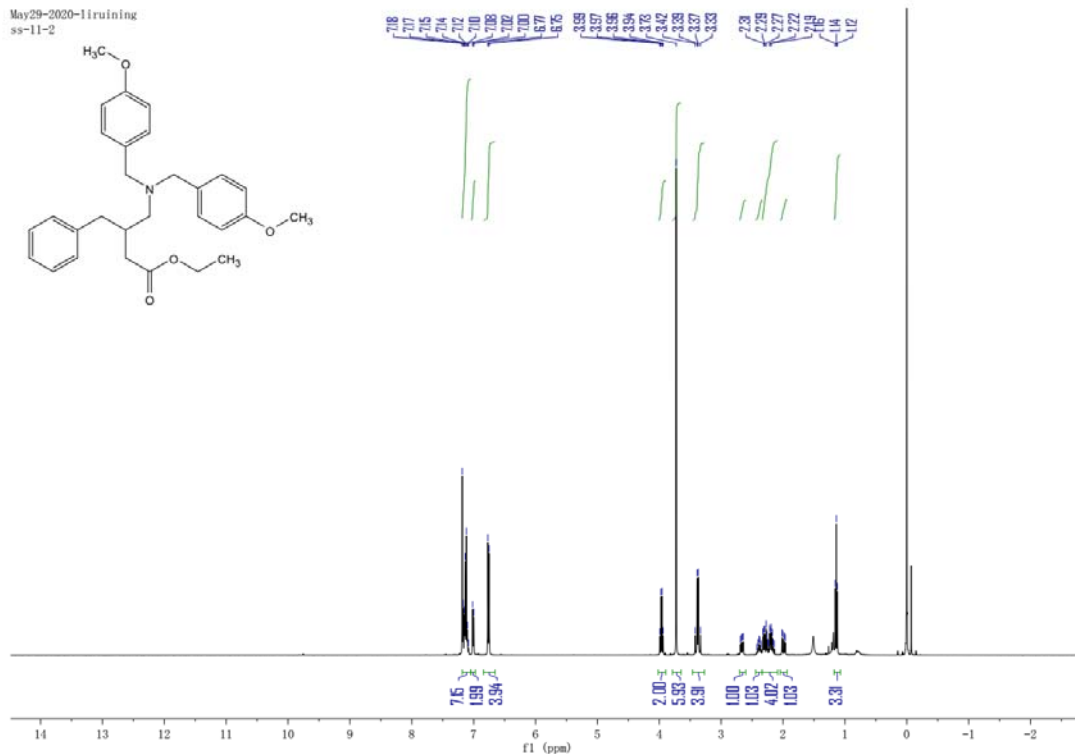



ss-q-11-C  
STANDARD FLUORINE PARAMETERS

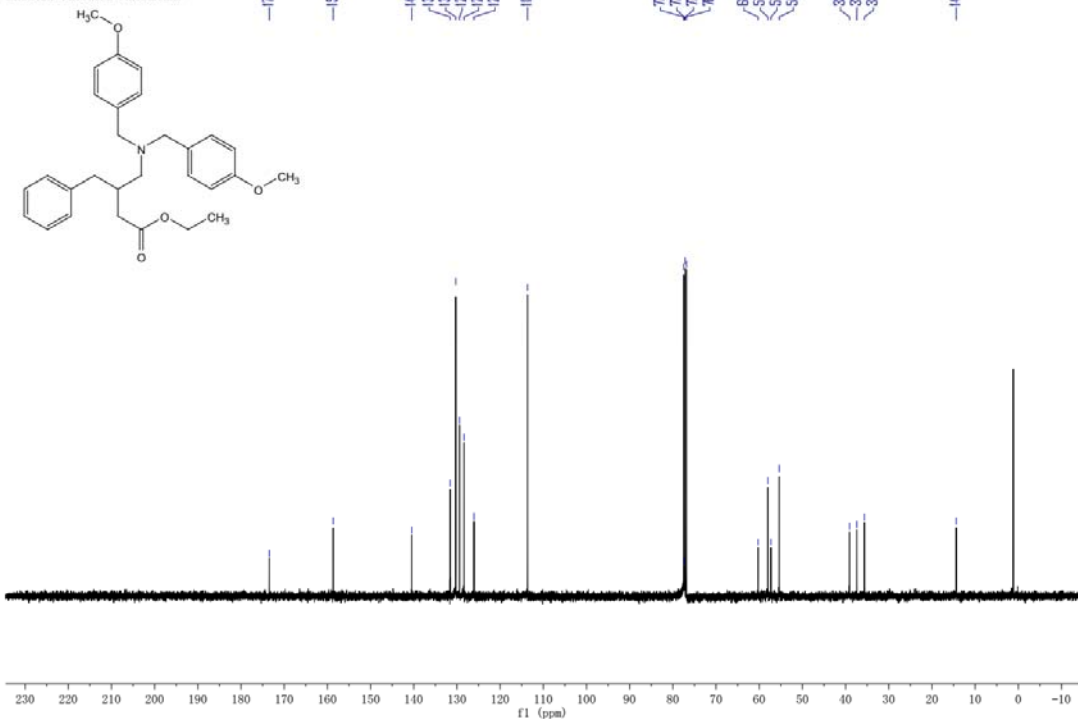

18

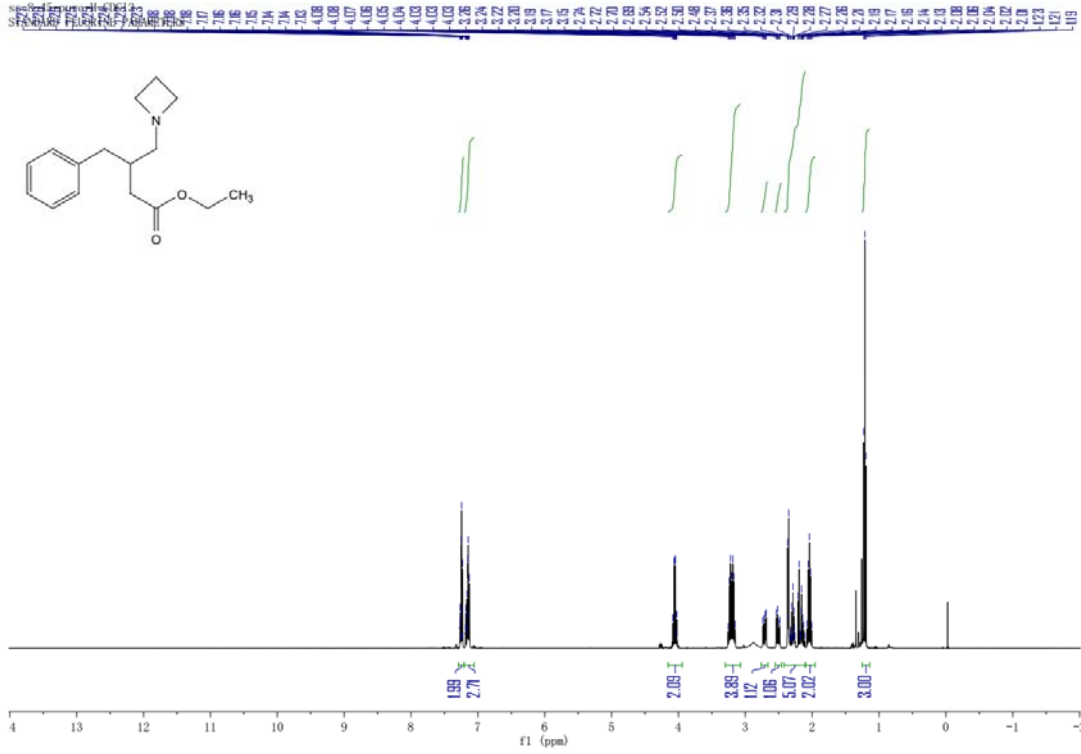

ss-8-45-pure-C13-CDCl3  
STANDARD FLUORINE PARAMETERS

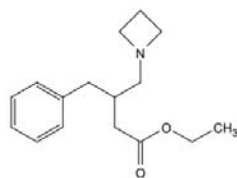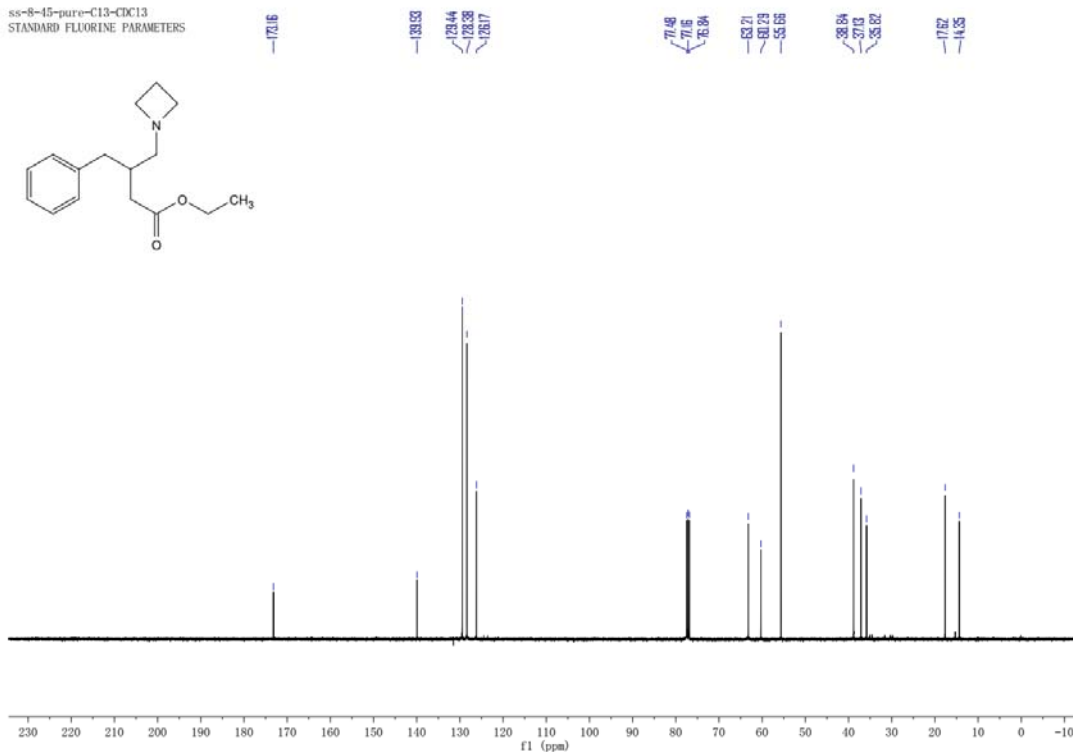

19

ss-8-2-pure-C13-CDCl3  
new experiment

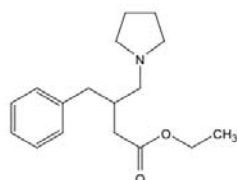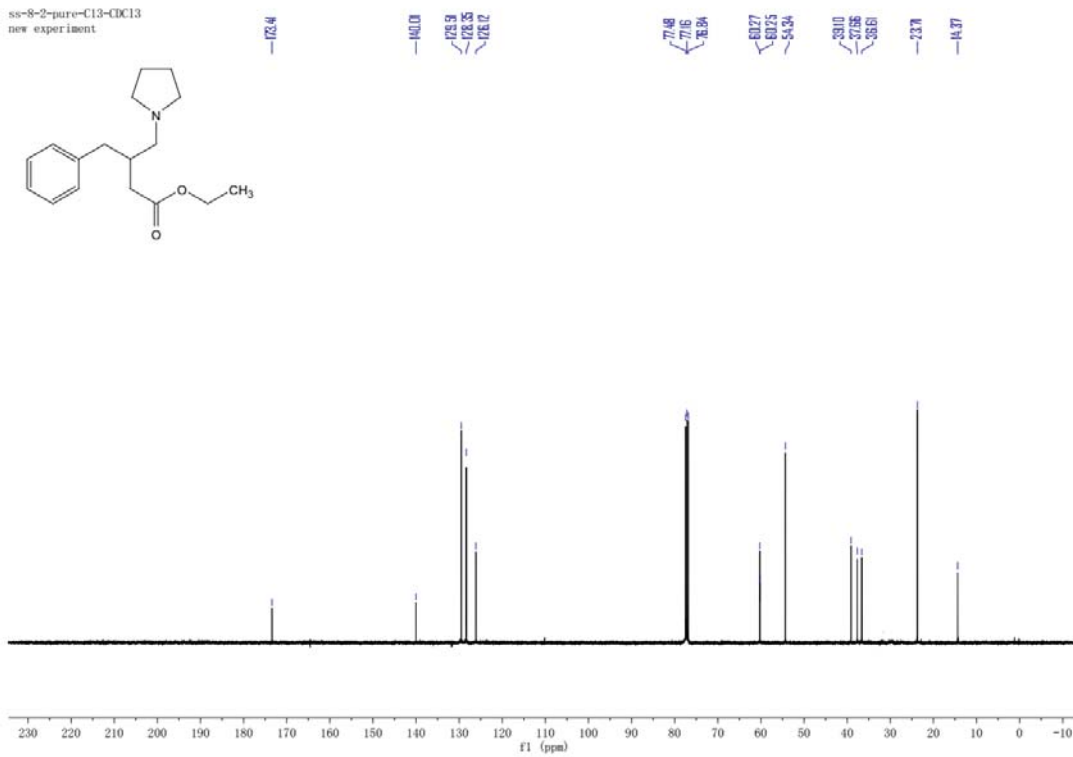

ss-8-2-pure-H-CDCl3  
 new experiment

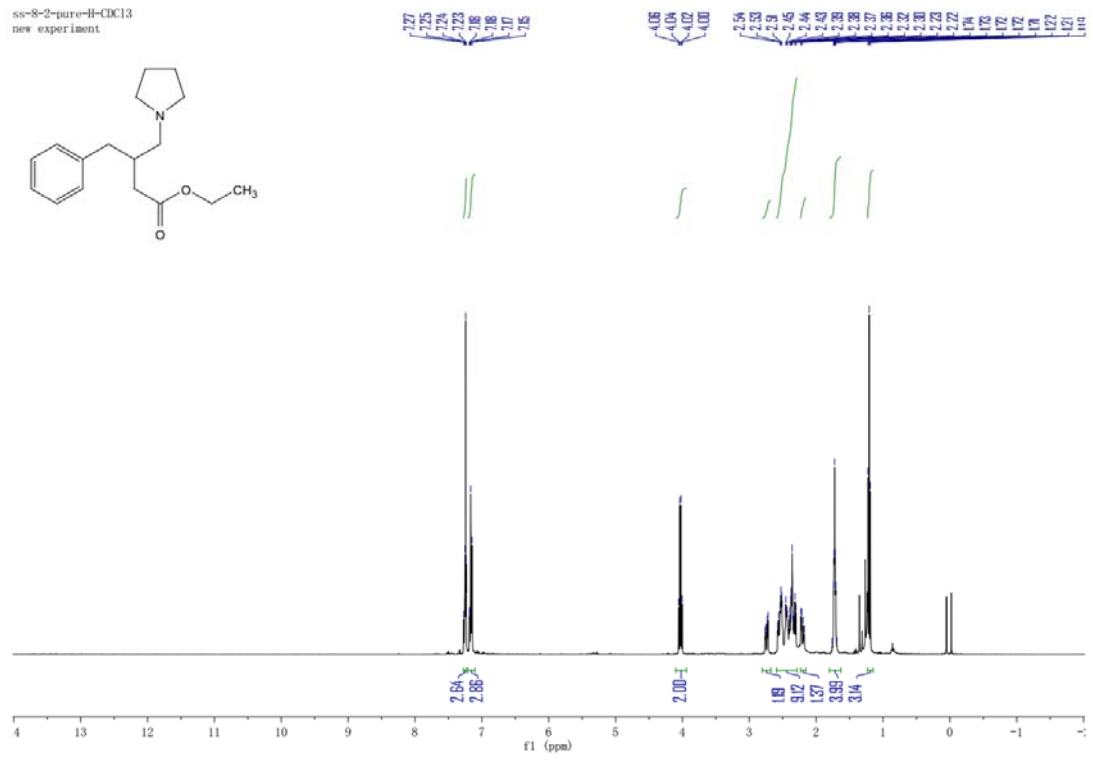

20

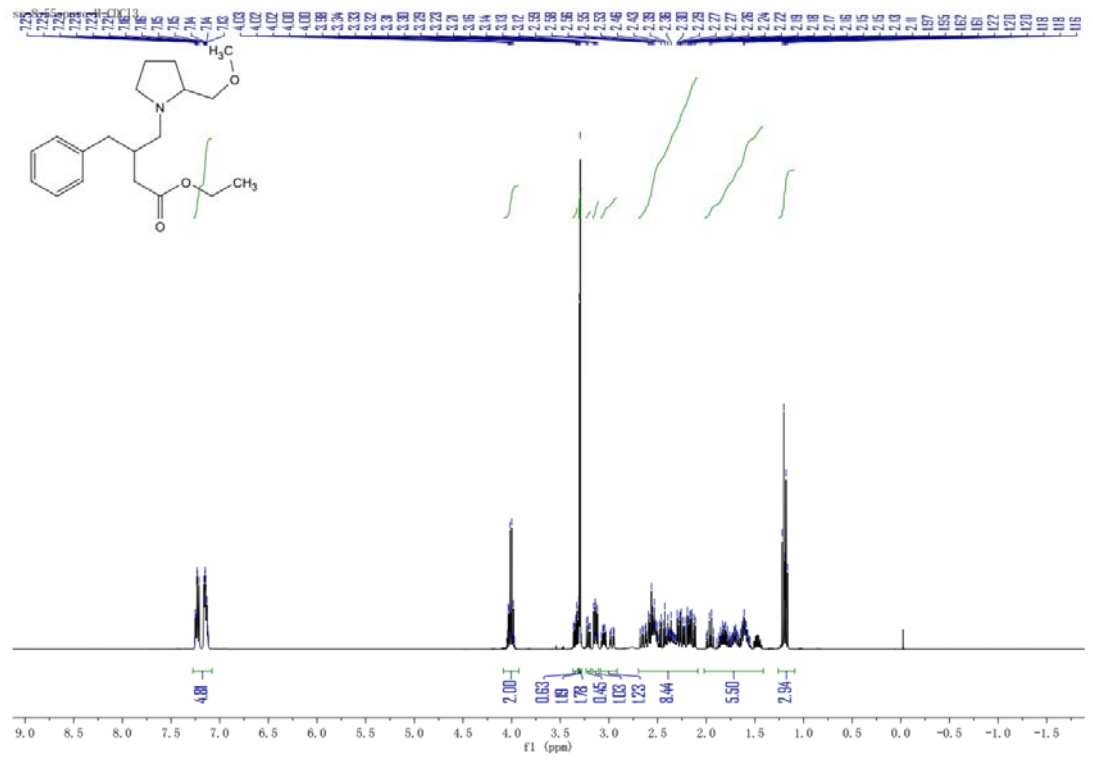

ss-8-55-pure-C13-CDCl3

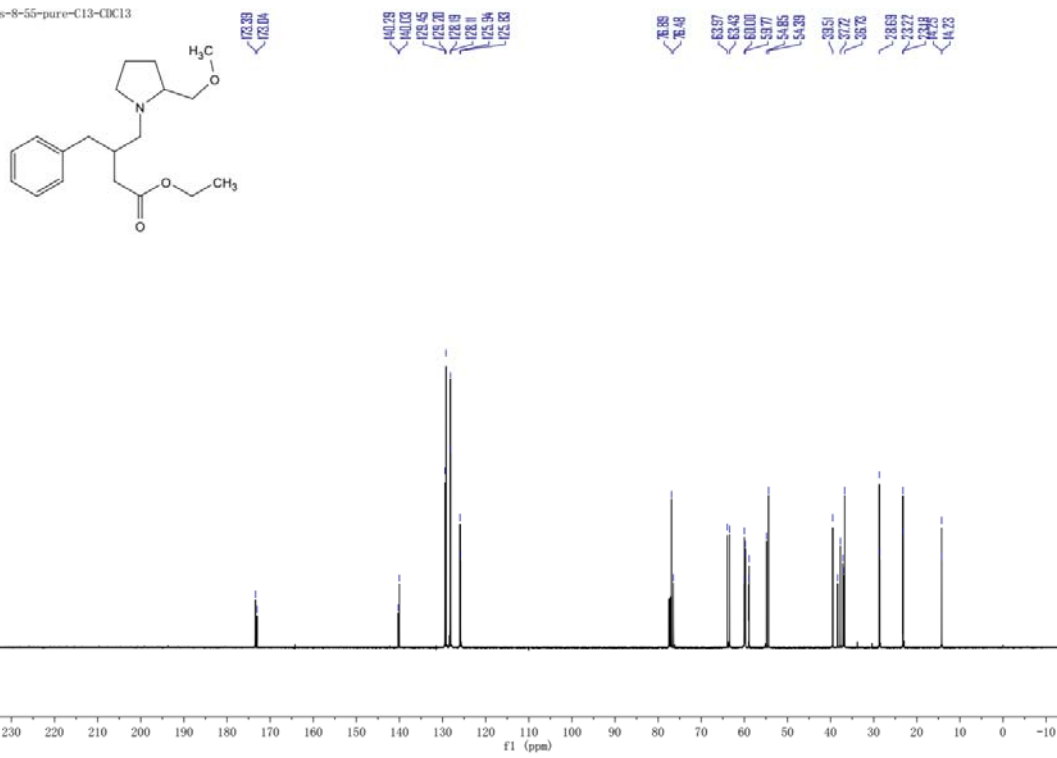

21

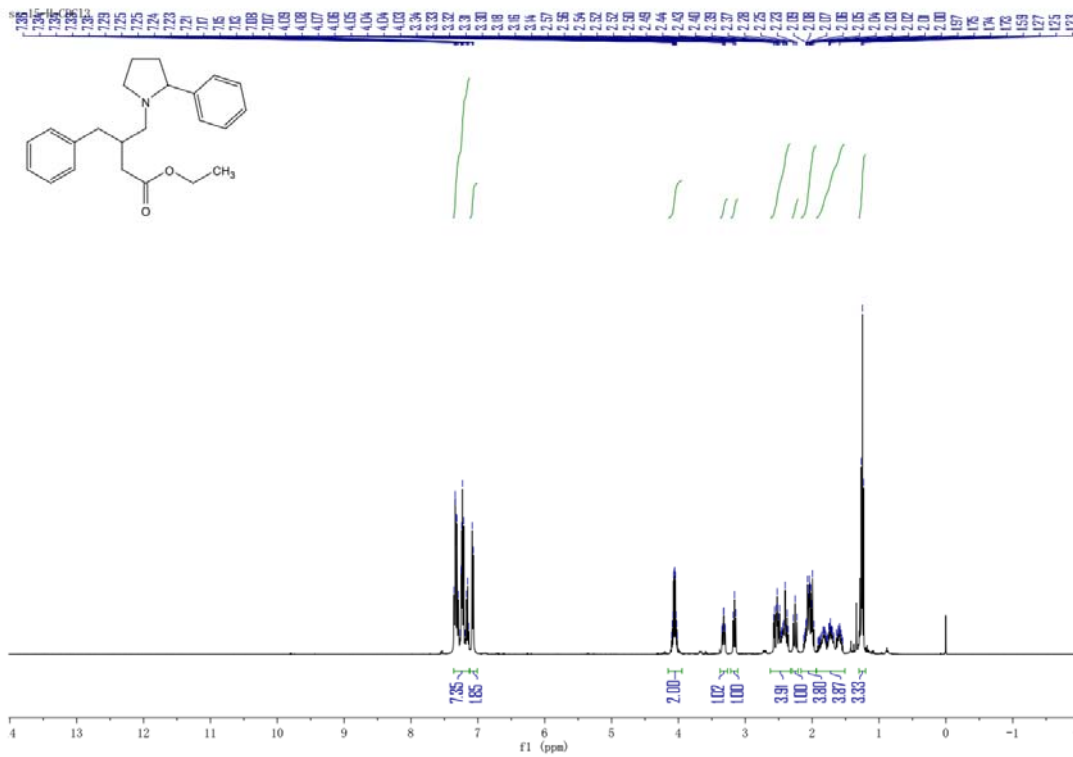

ss-15-C13-CDCl3

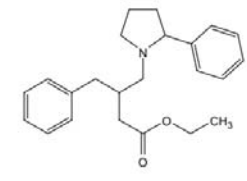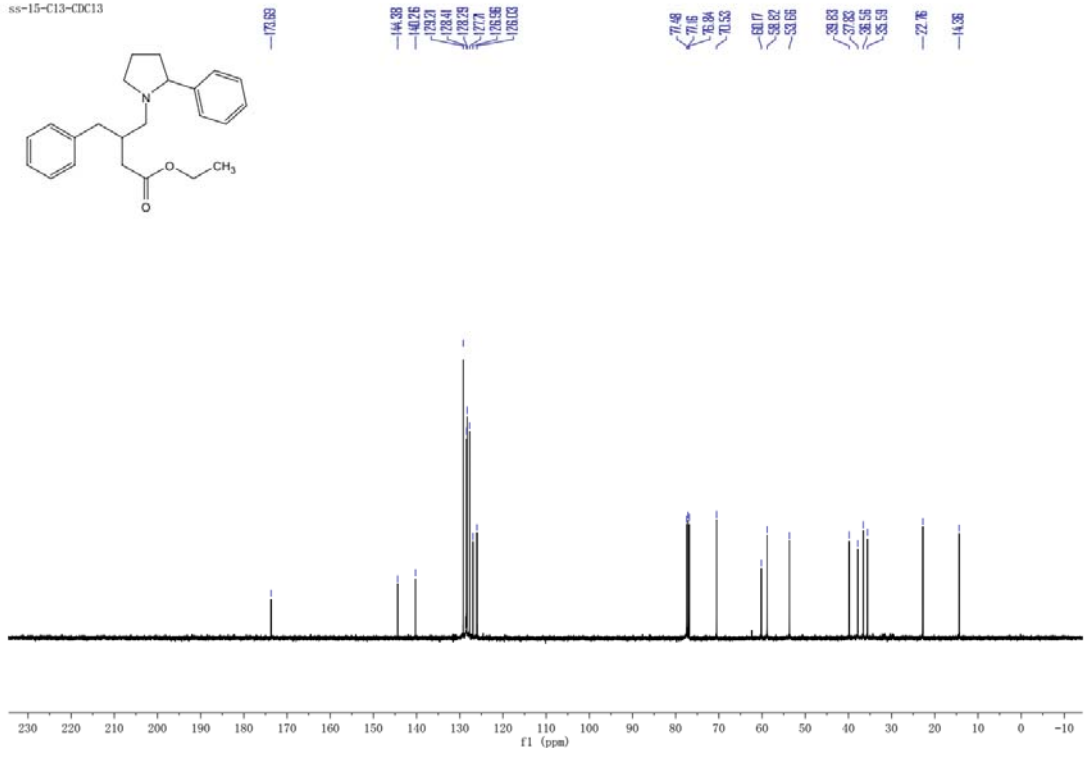

22

ss-8-12-pure-H-CDCl3

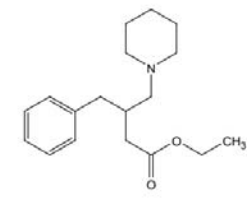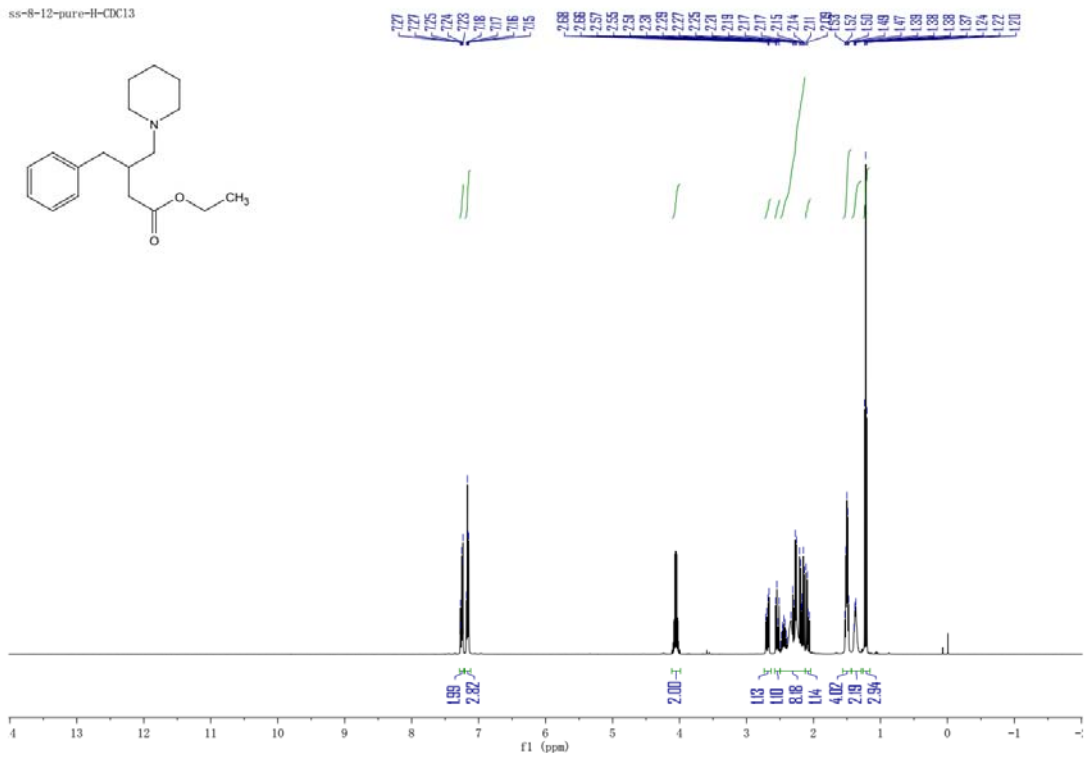

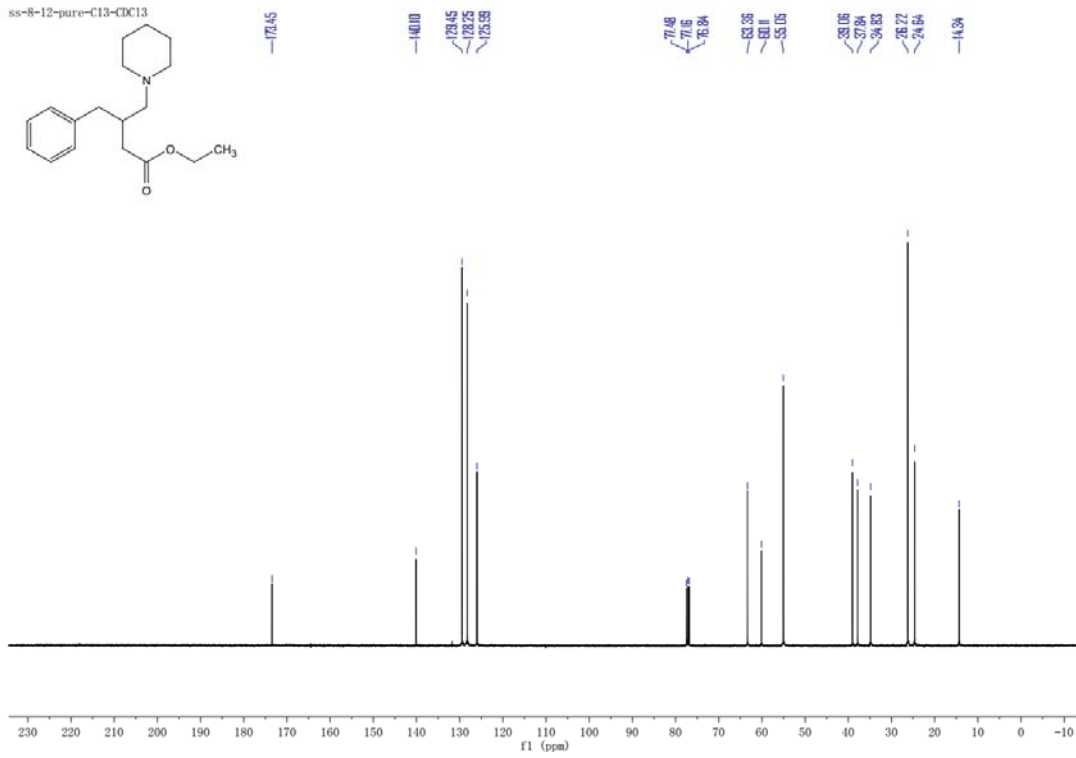

23

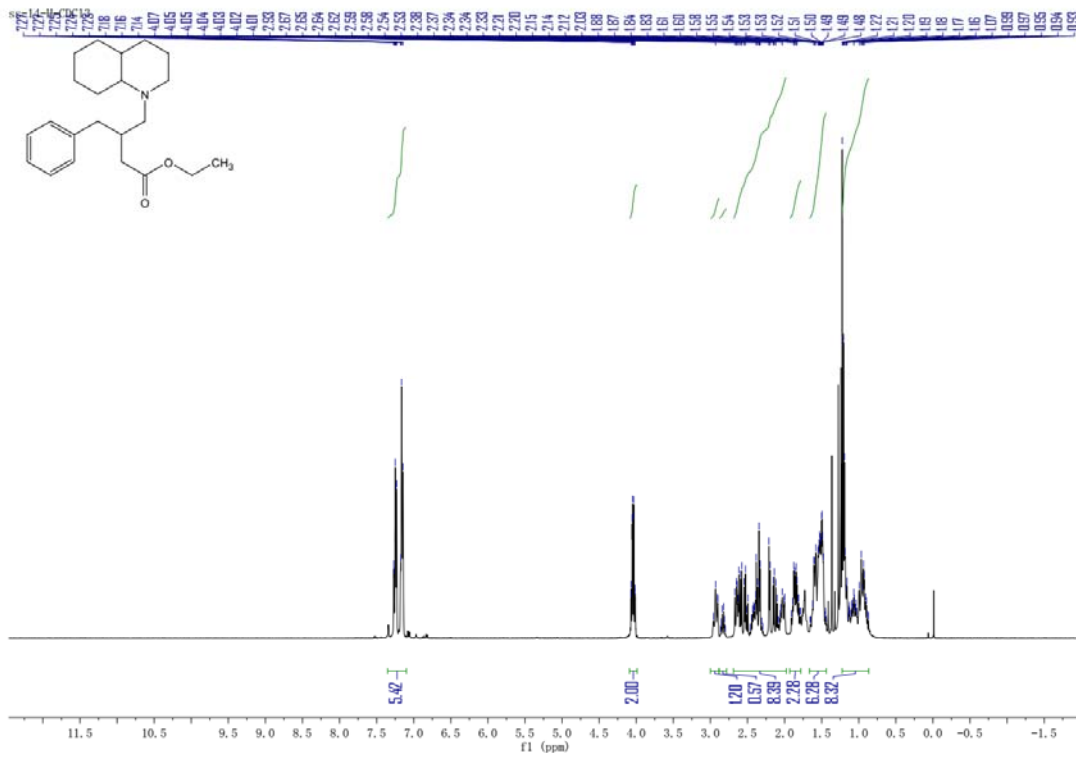

M-ss-14-C-0  
STANDARD FLUORINE PARAMETERS

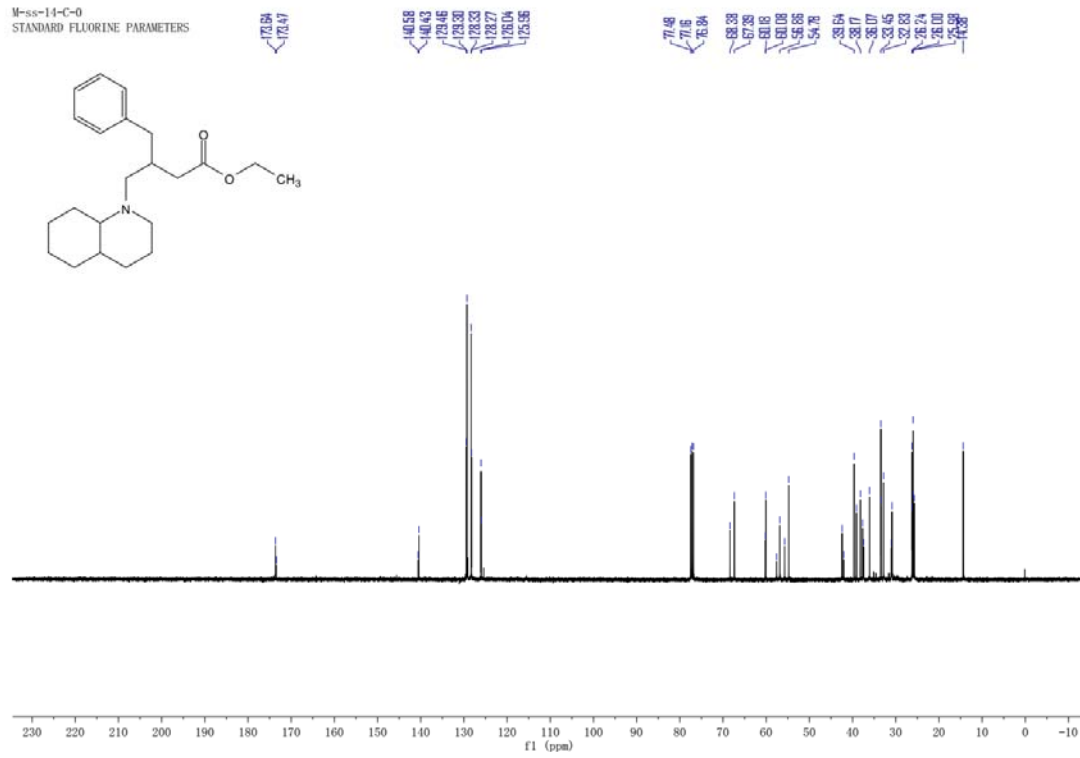

24

20200526mc2

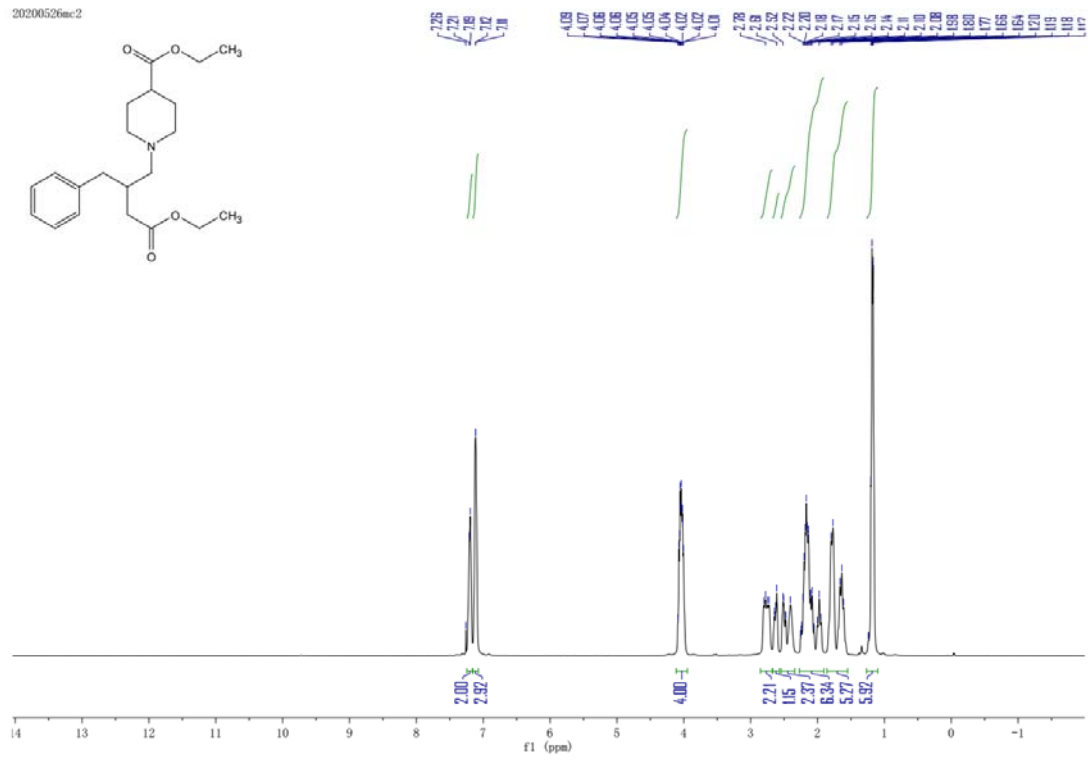

ss-10-C13-CDCl3

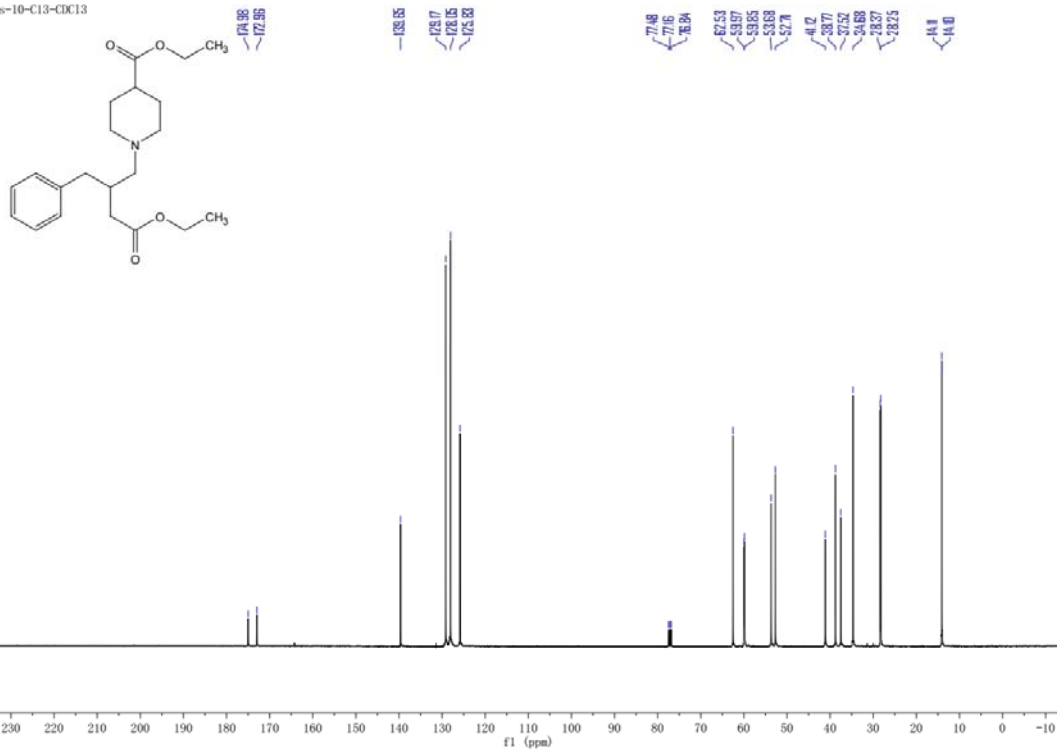

25

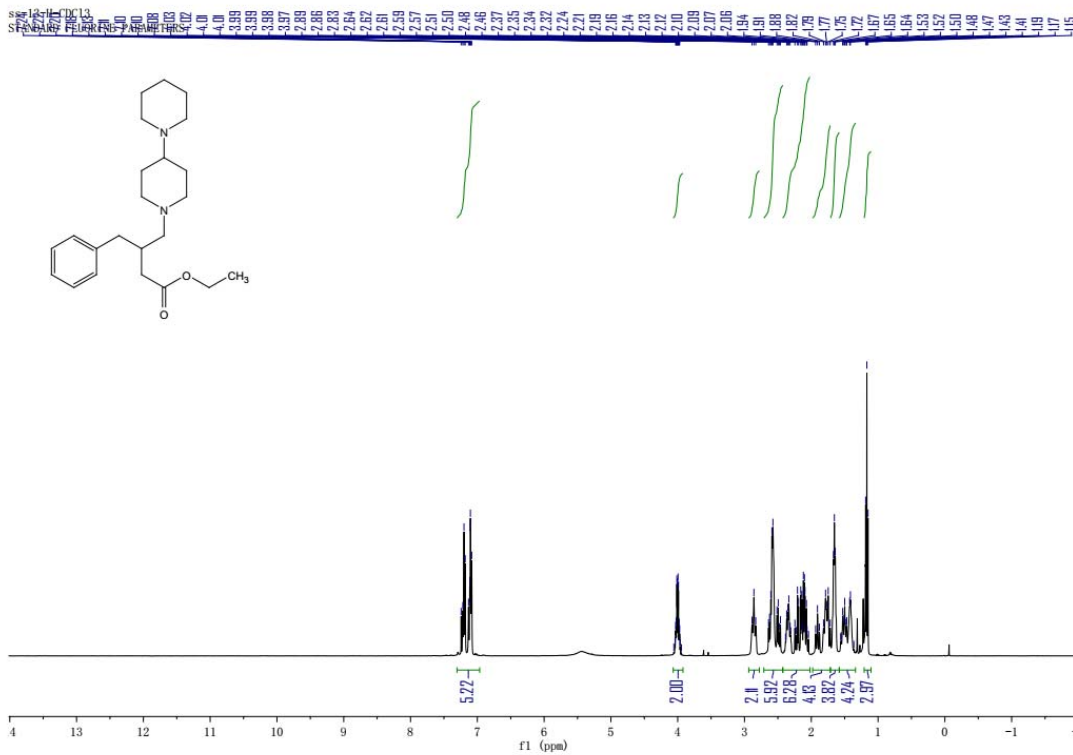







ss-5-C13-CDCl3  
STANDARD FLUORINE PARAMETERS

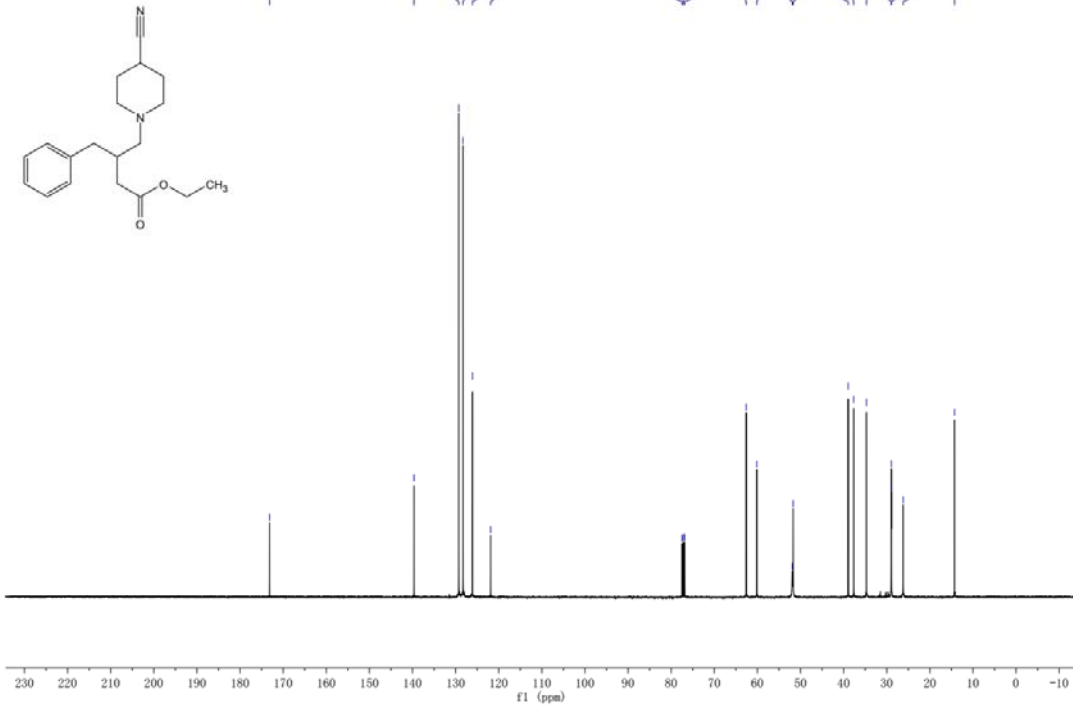

28

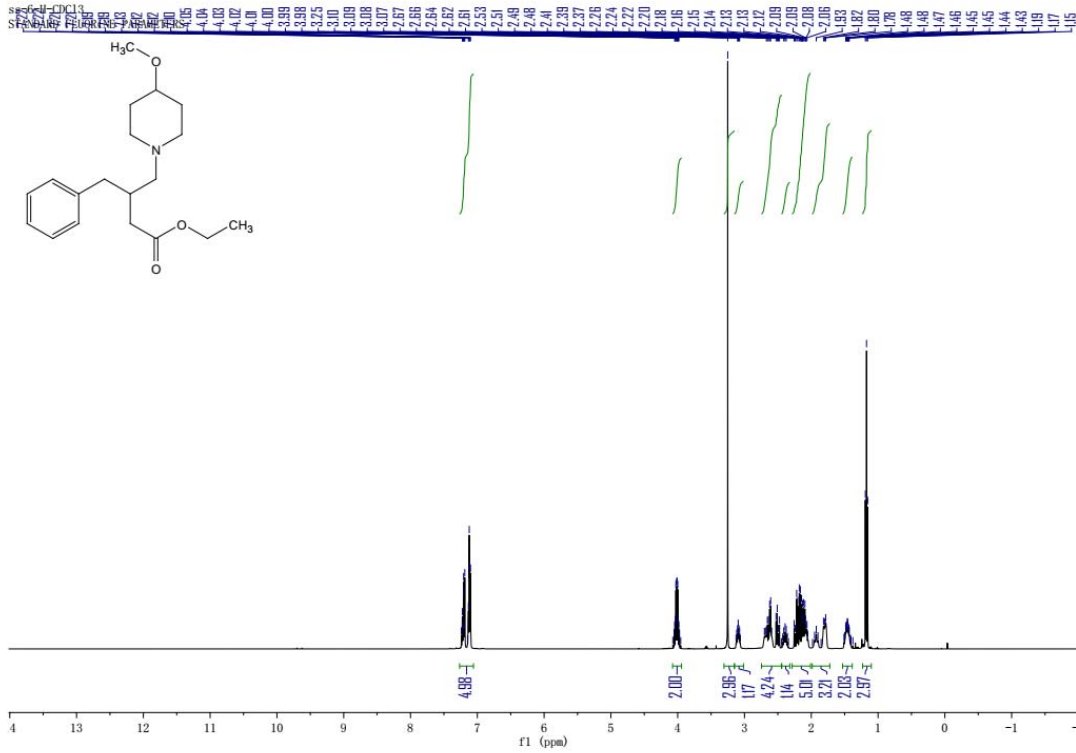

ss-6-C13-CDCl3  
STANDARD FLUORINE PARAMETERS

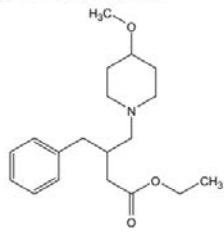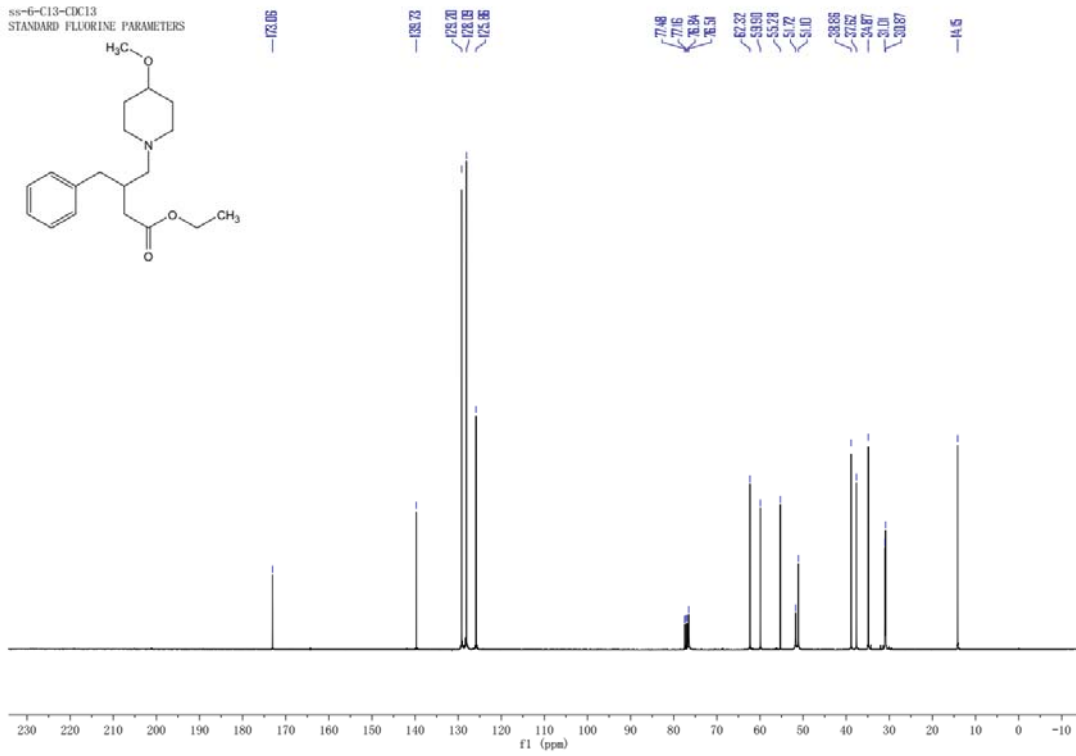

29

20200517c4  
STANDARD FLUORINE PARAMETERS

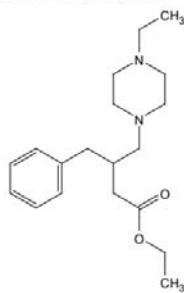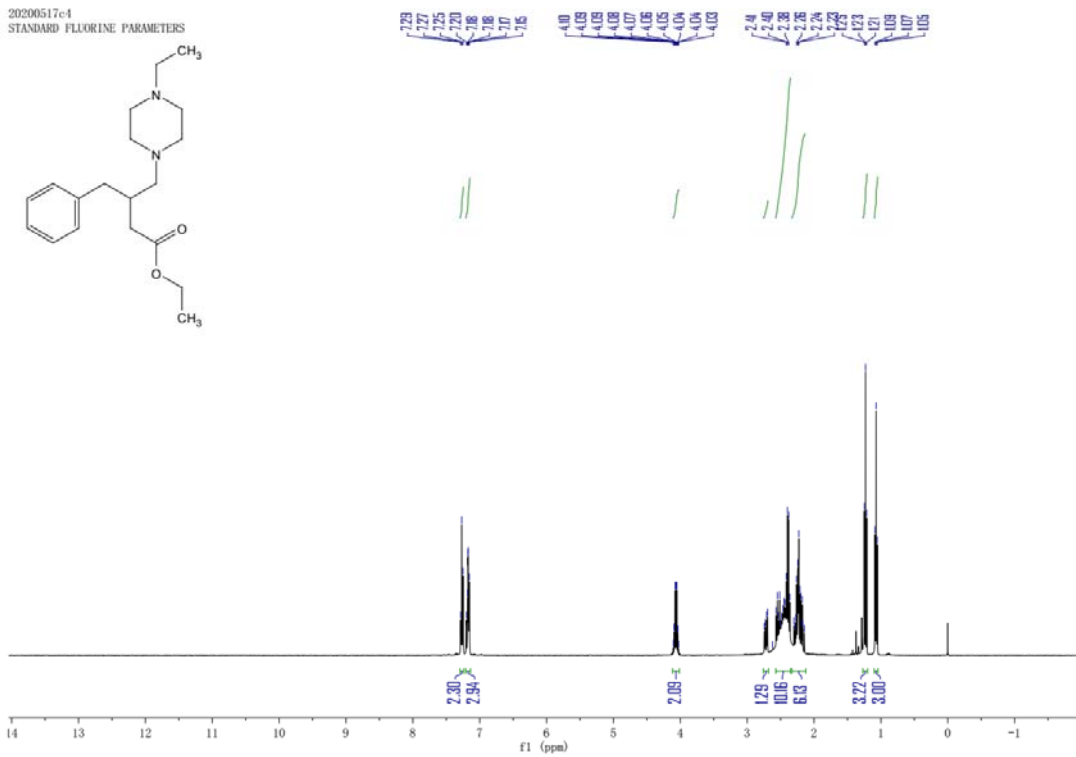



ss-3-C13-CDCl3  
STANDARD FLUORINE PARAMETERS

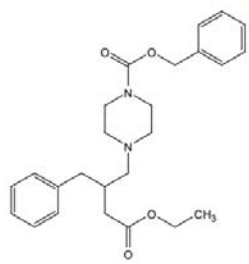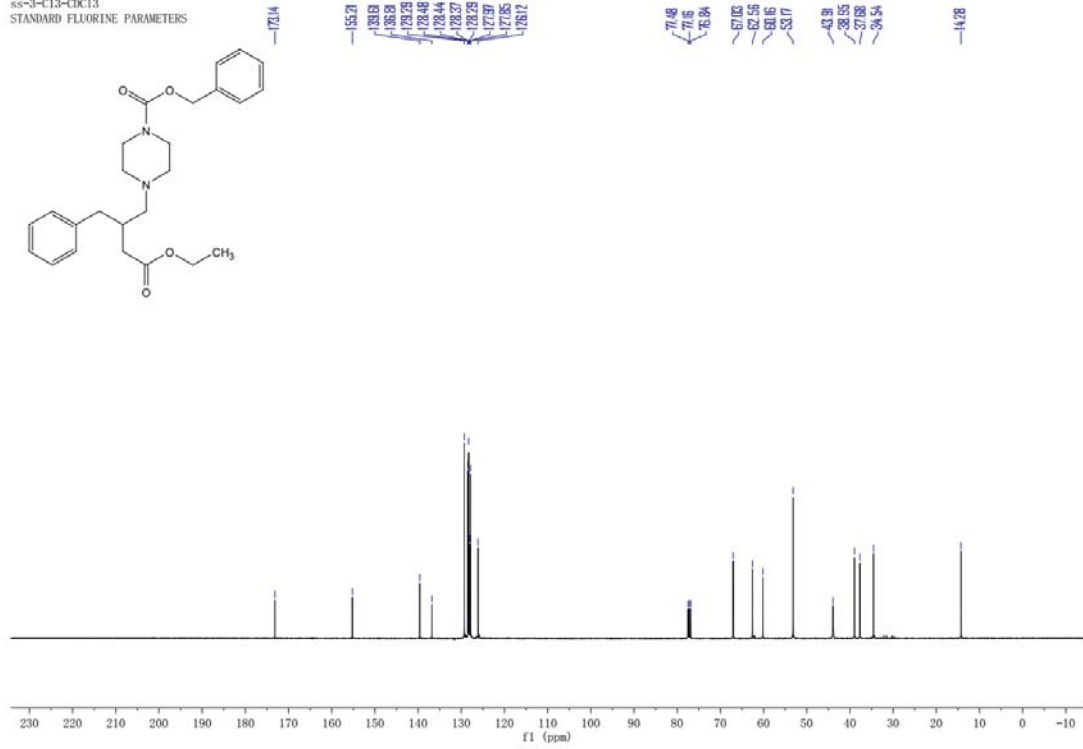

31

ss-12-H-CDCl3  
STANDARD FLUORINE PARAMETERS

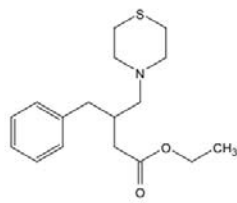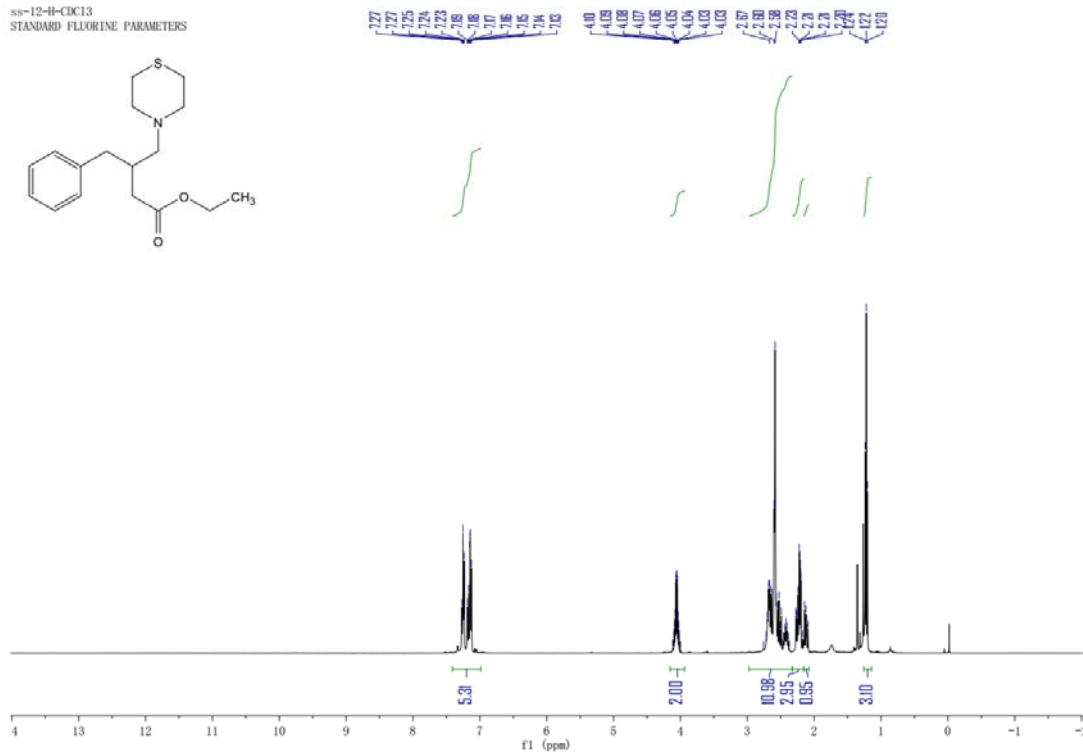

ss-12-C13-CDCl3  
STANDARD FLUORINE PARAMETERS

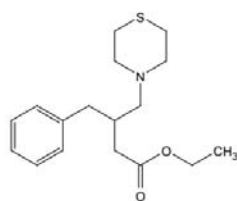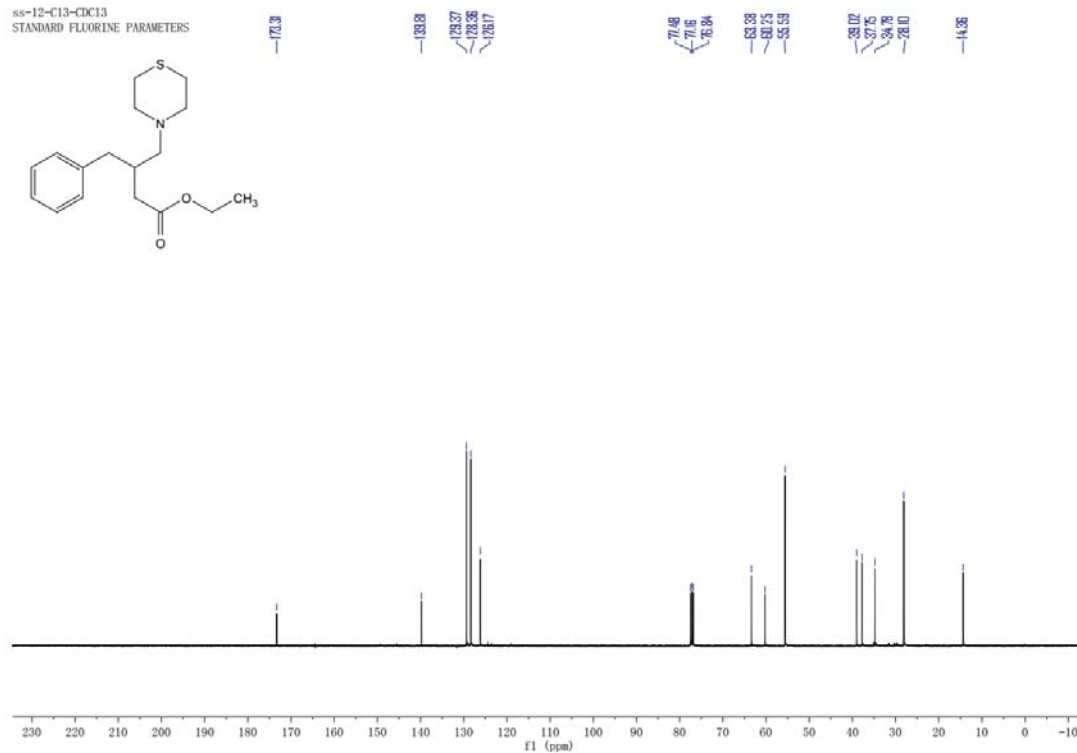

32

ss-8-19-pure-II-CDCl3

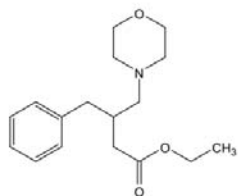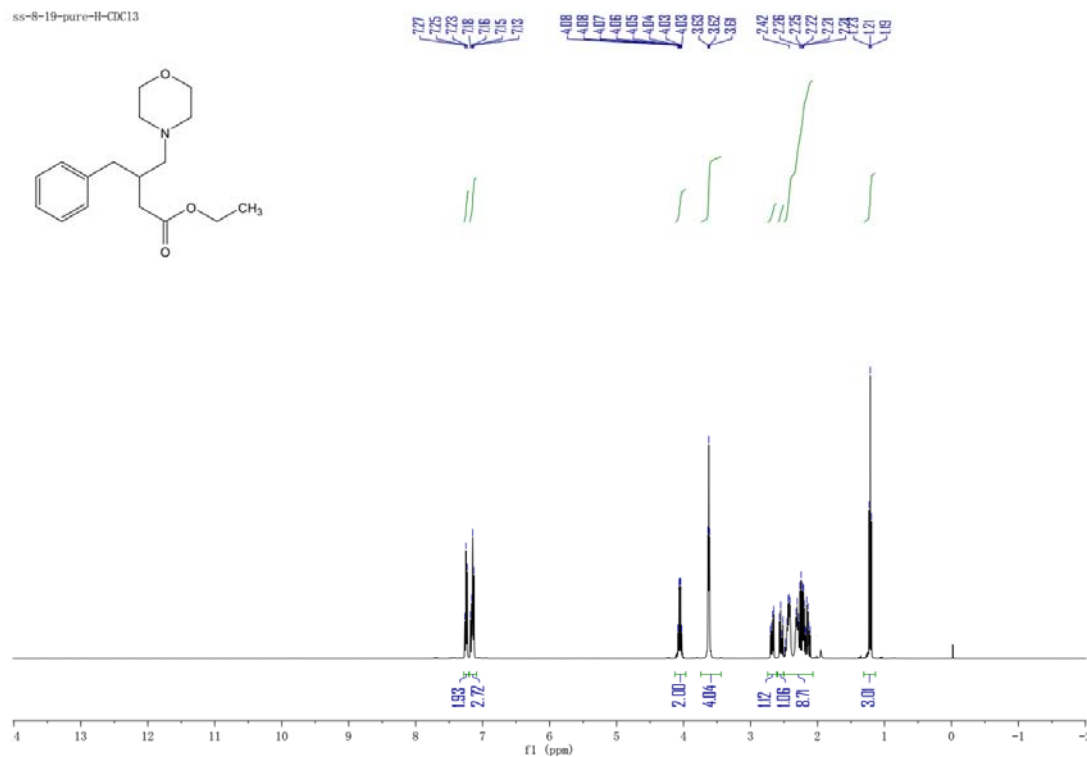

ss-8-19-pure-C13-CDCl3

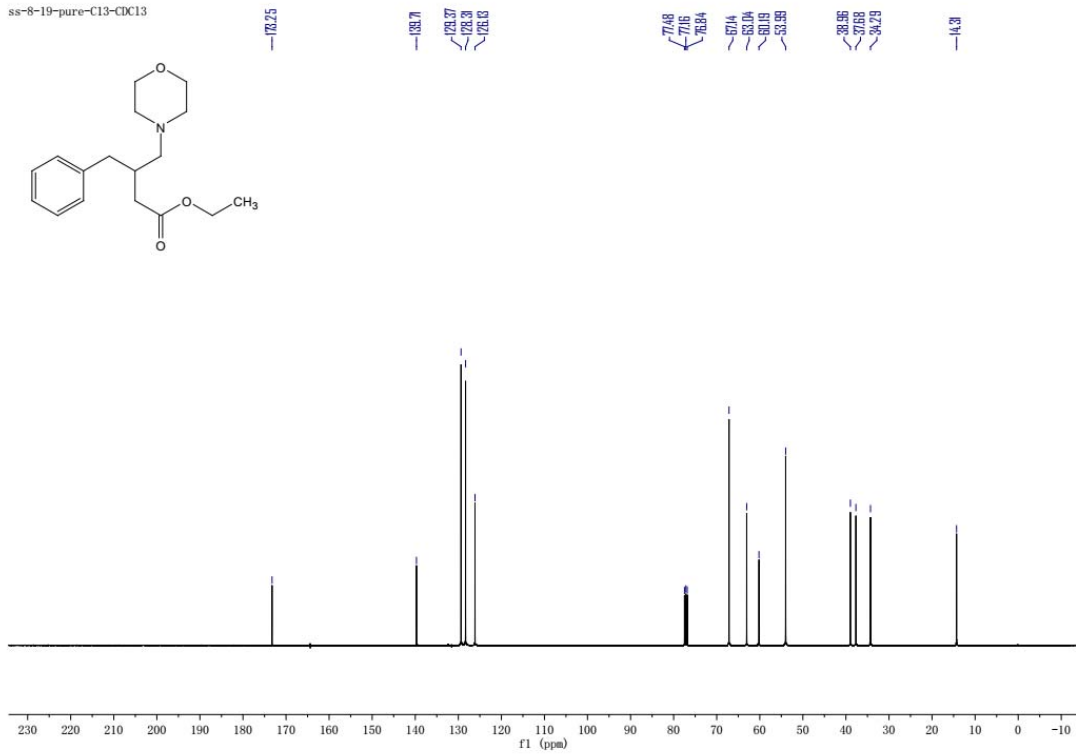

33

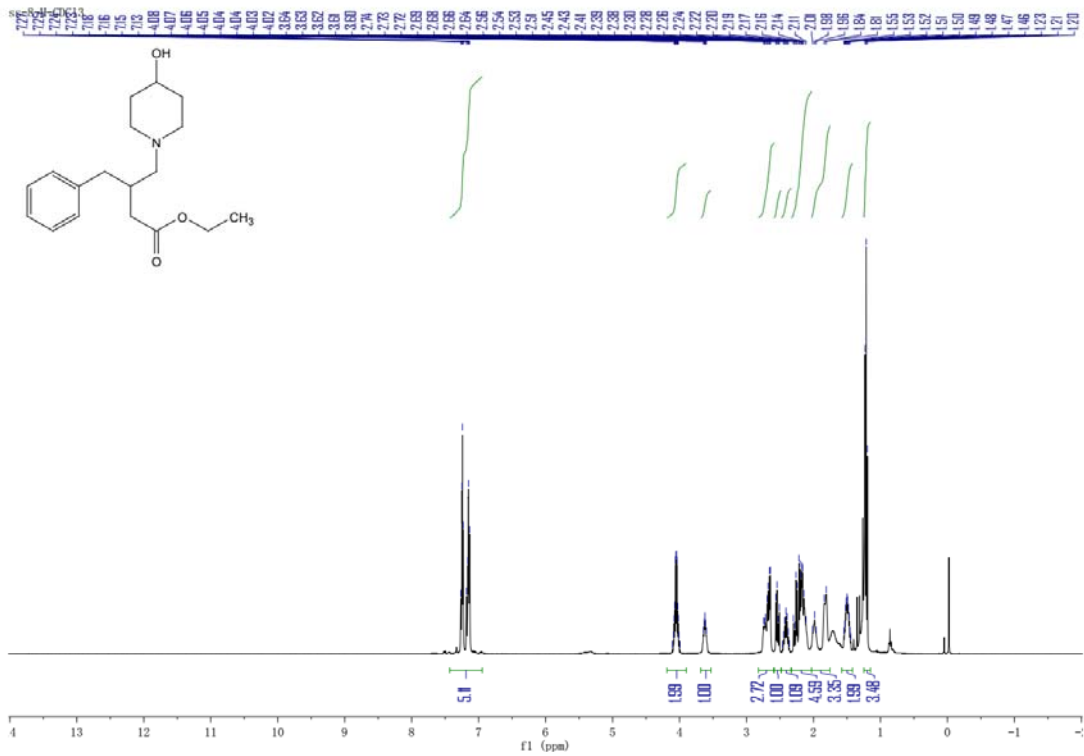



ss-8-C13-CDCl3  
STANDARD FLUORINE PARAMETERS

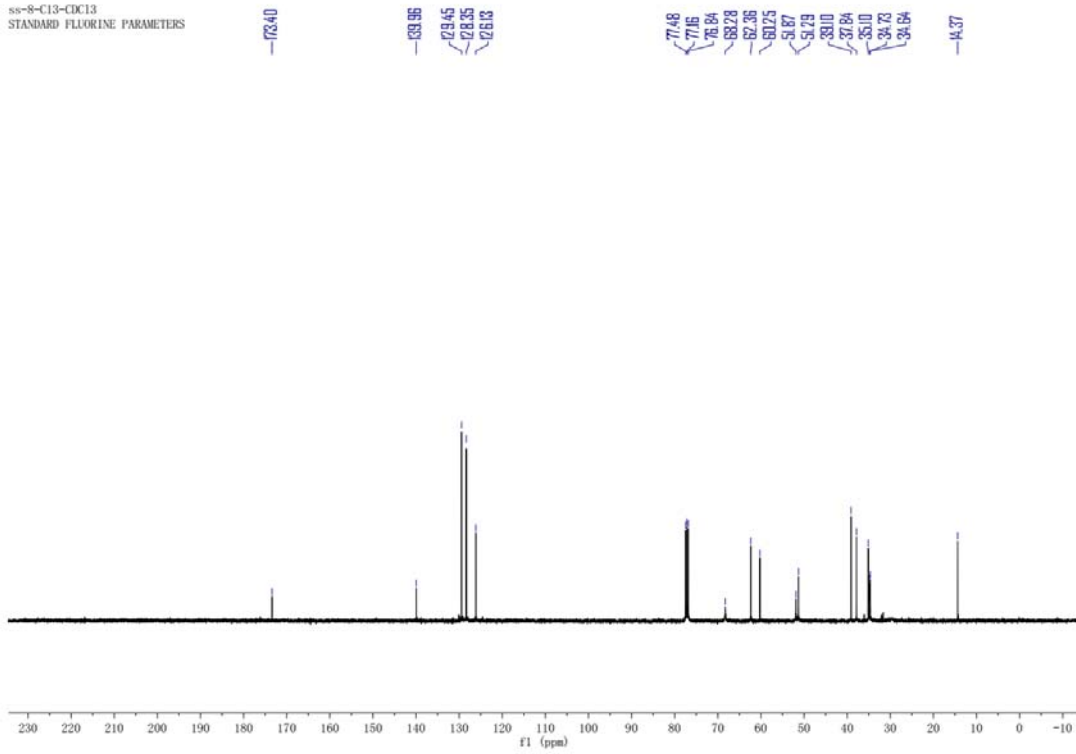

34

ss-q-22-H  
STANDARD FLUORINE PARAMETERS

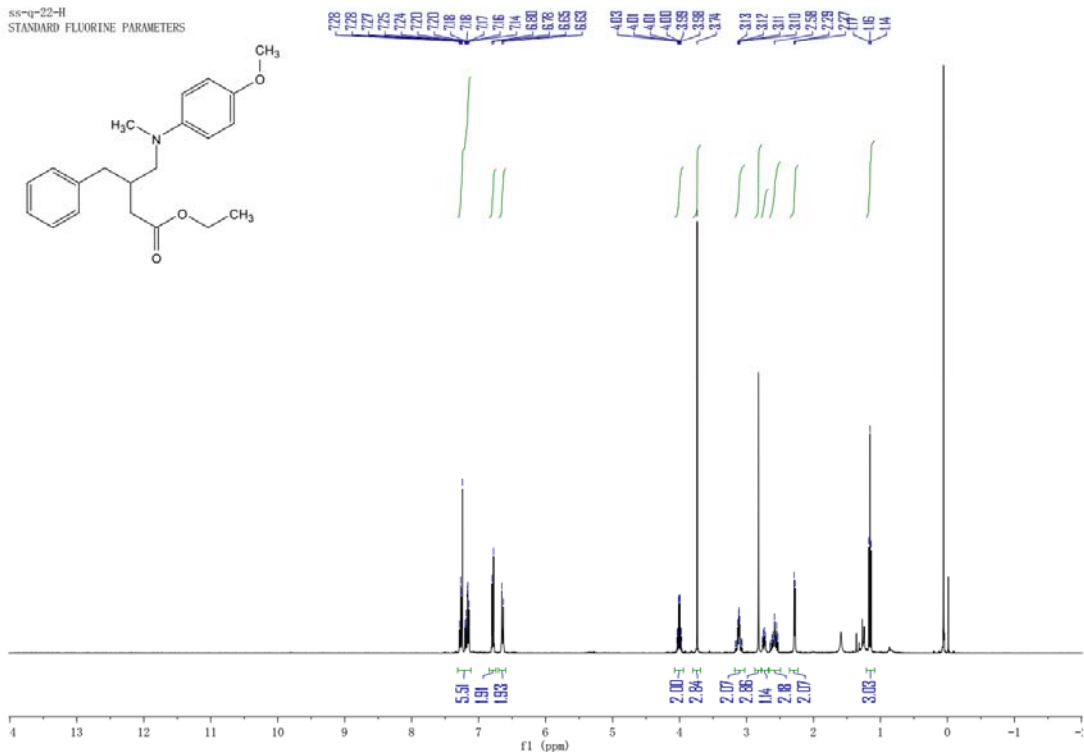

ss-q-22-C  
STANDARD FLUORINE PARAMETERS

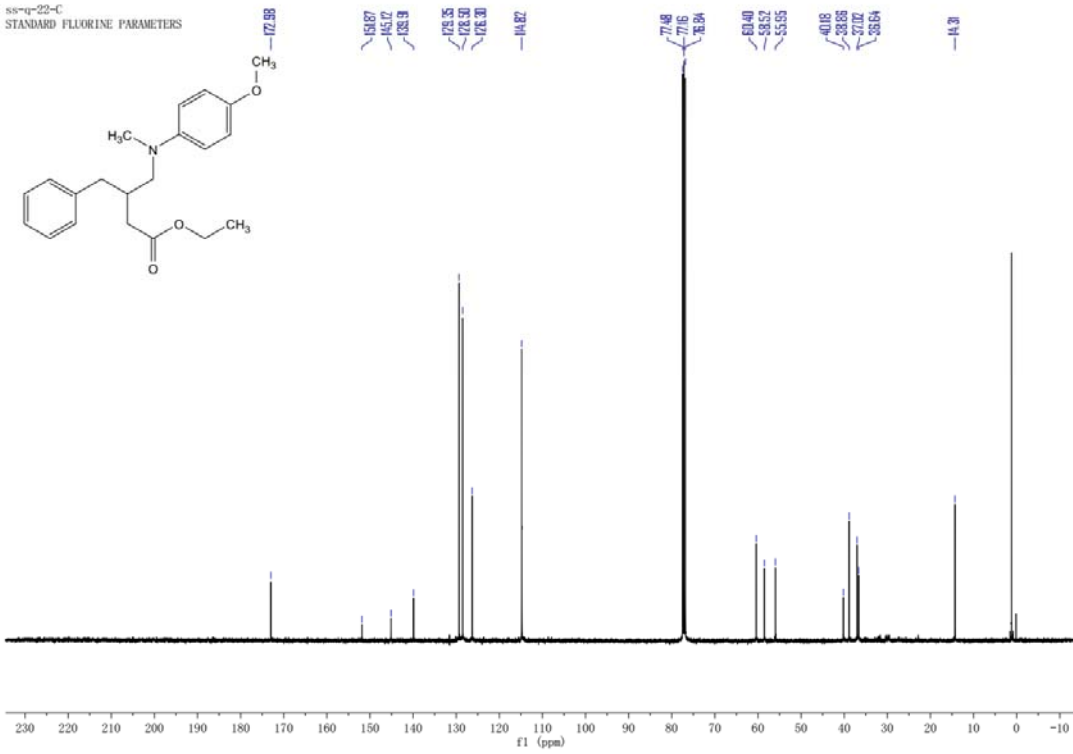

35

ss-q-37-H  
STANDARD FLUORINE PARAMETERS

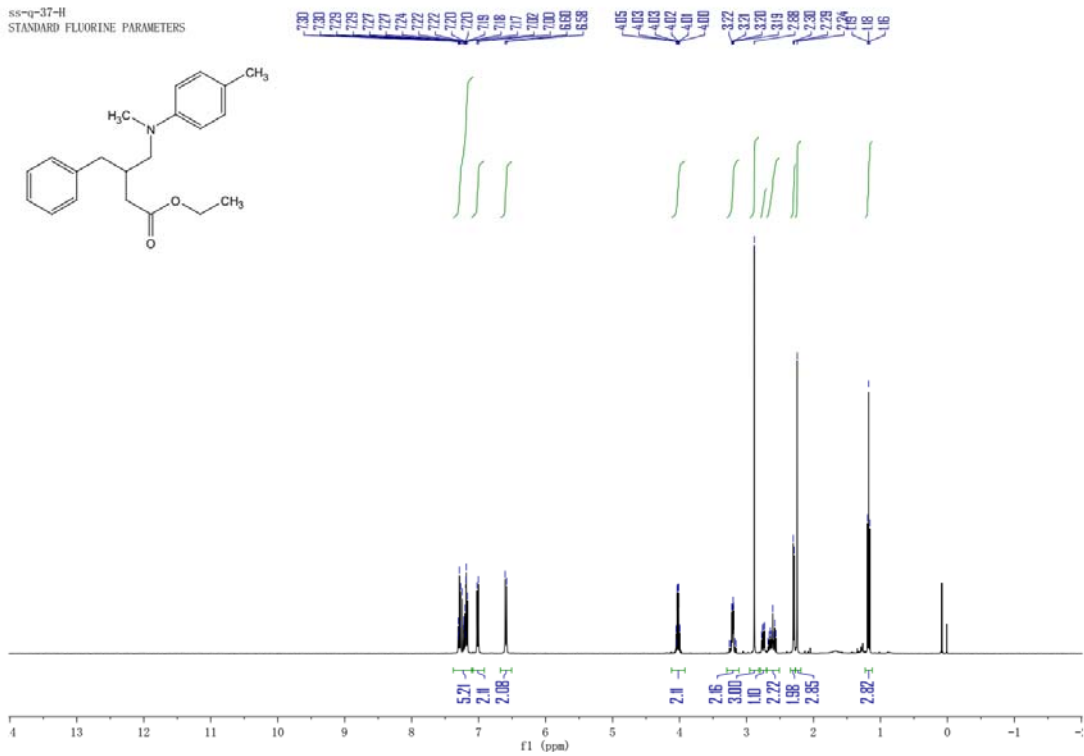

ss-a-37-C  
STANDARD FLUORINE PARAMETERS

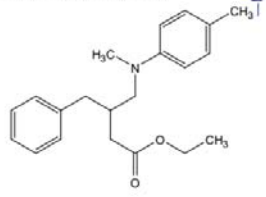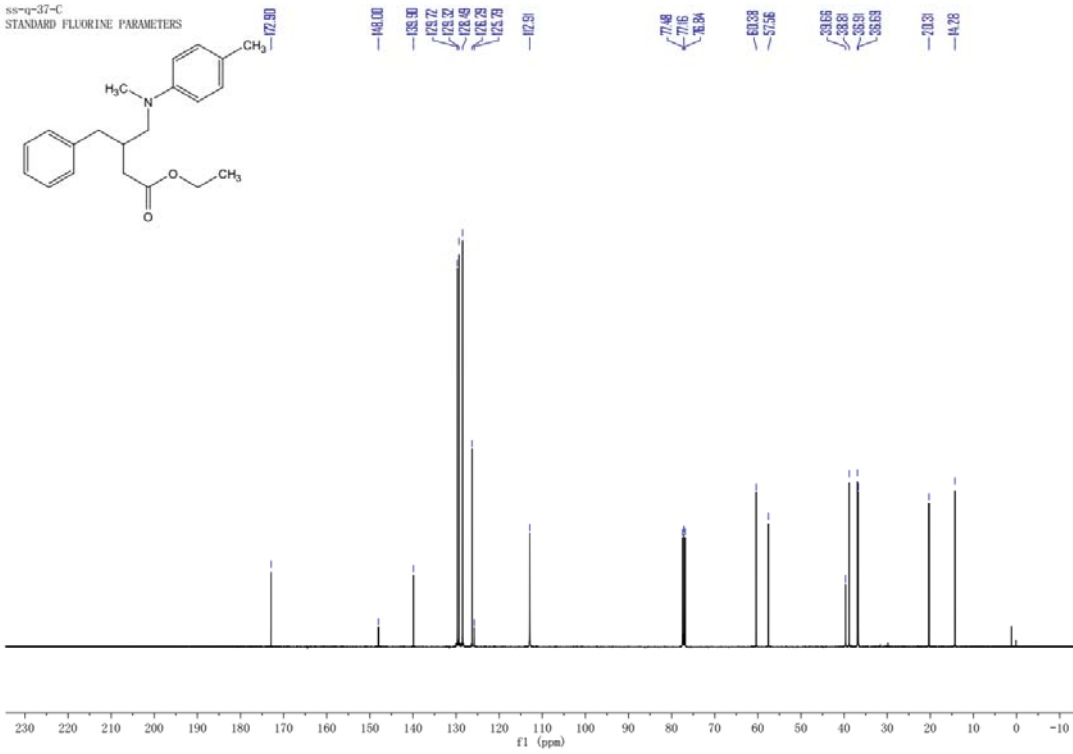

36

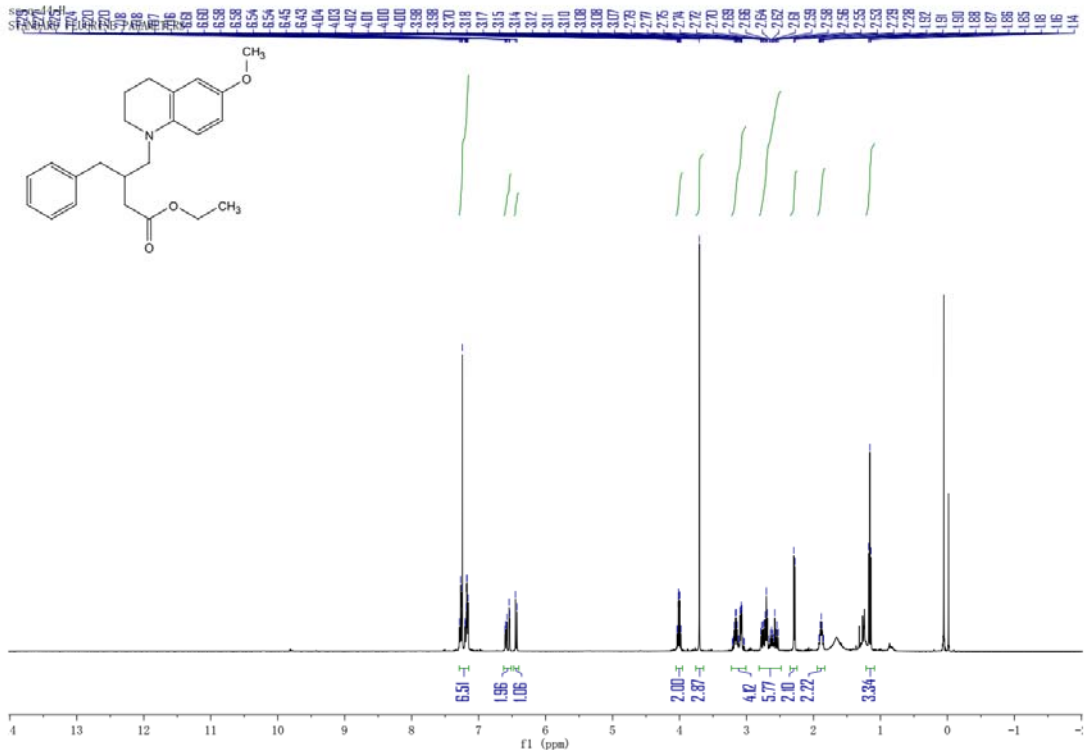

ss-q-44-C  
STANDARD FLUORINE PARAMETERS

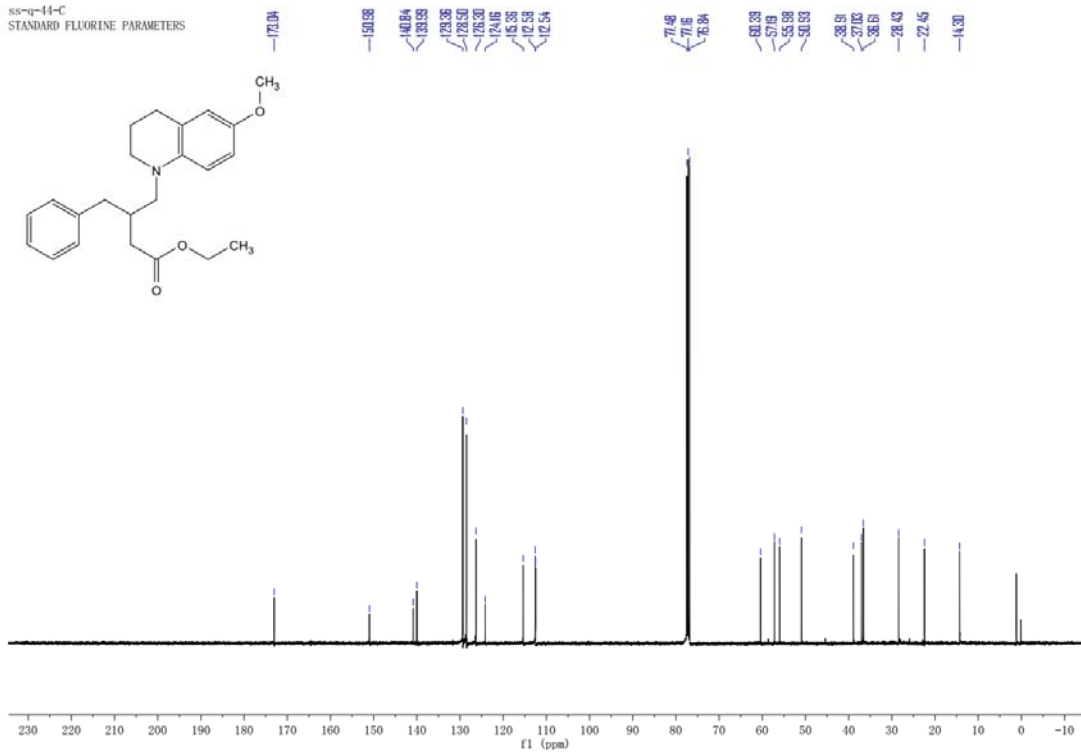

37

ss-8-89E-pure-H-CDC13  
STANDARD FLUORINE PARAMETERS

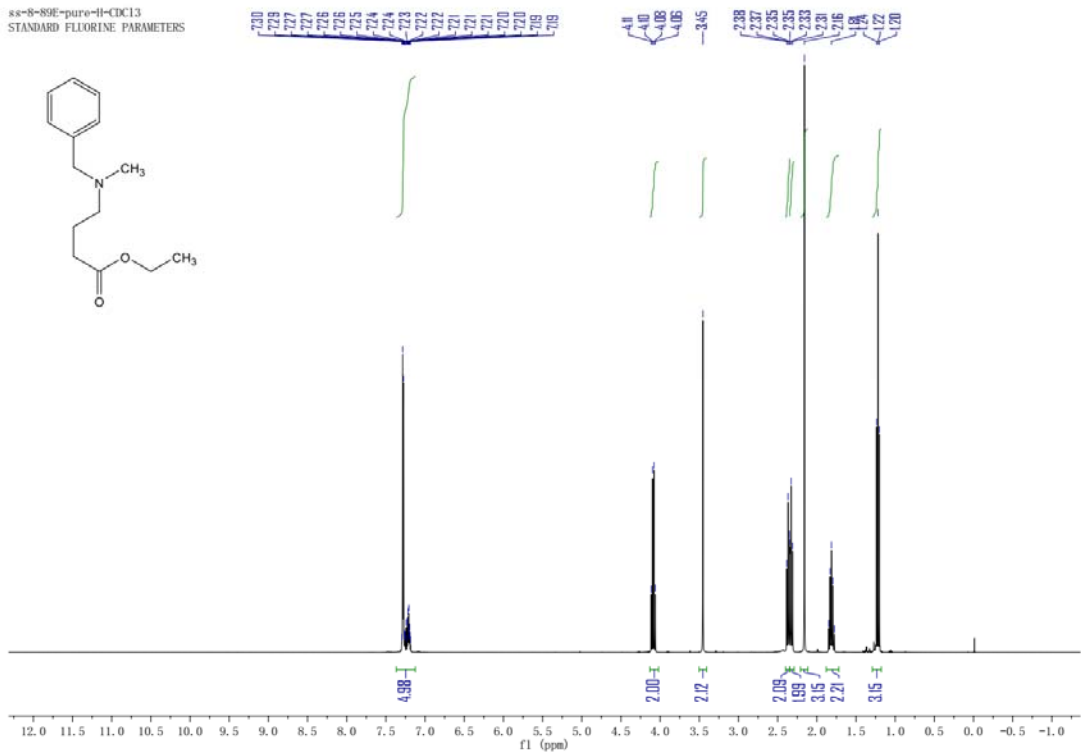

ss-8-89E-pure-C13-CDCl3  
STANDARD FLUORINE PARAMETERS

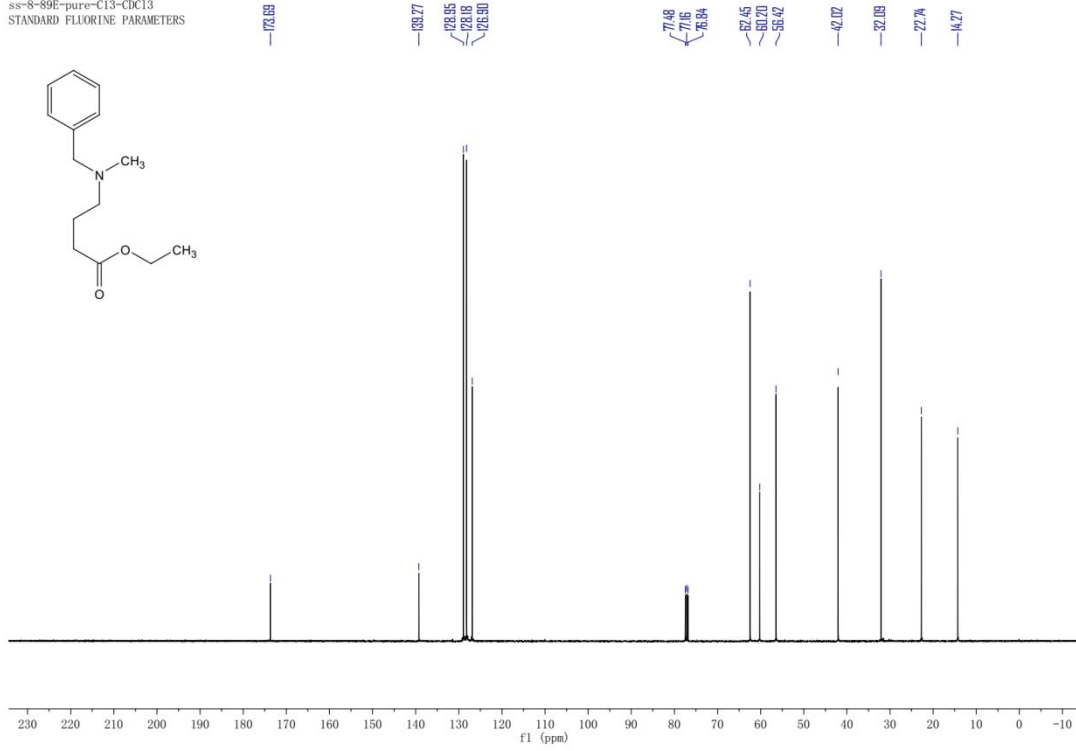

38

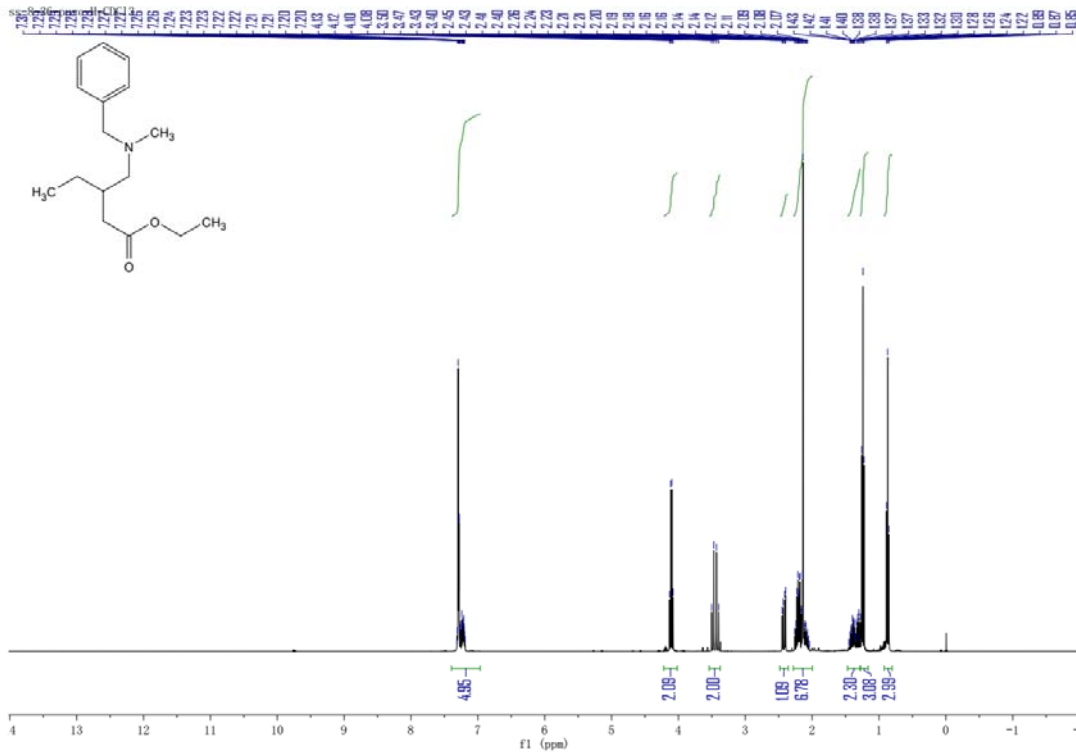

ss-8-36-pure-C13-CDCl3

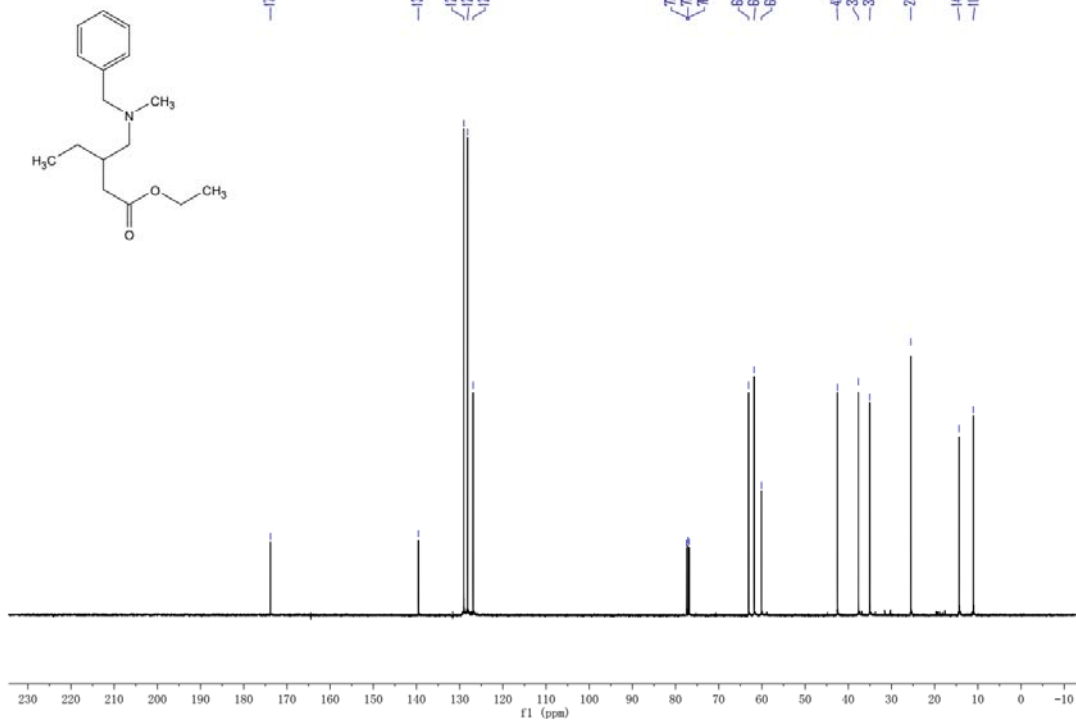

39

ss-8-58-pure-H-CDCl3

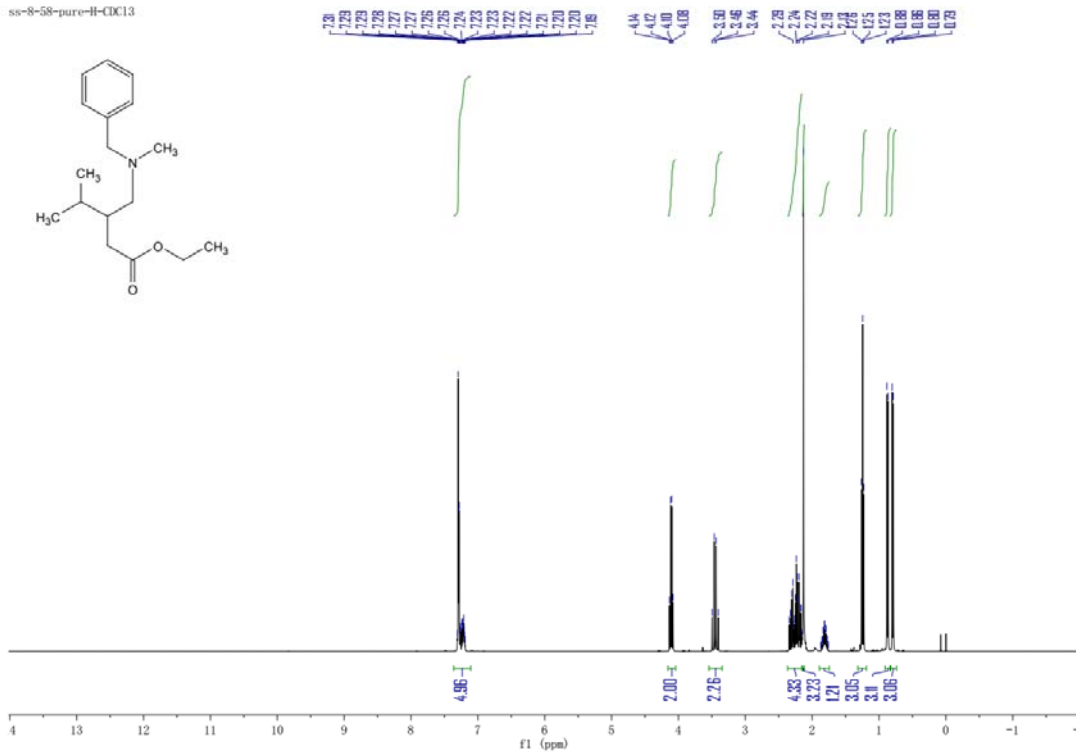

ss-8-58-pure-C13-CDCl3

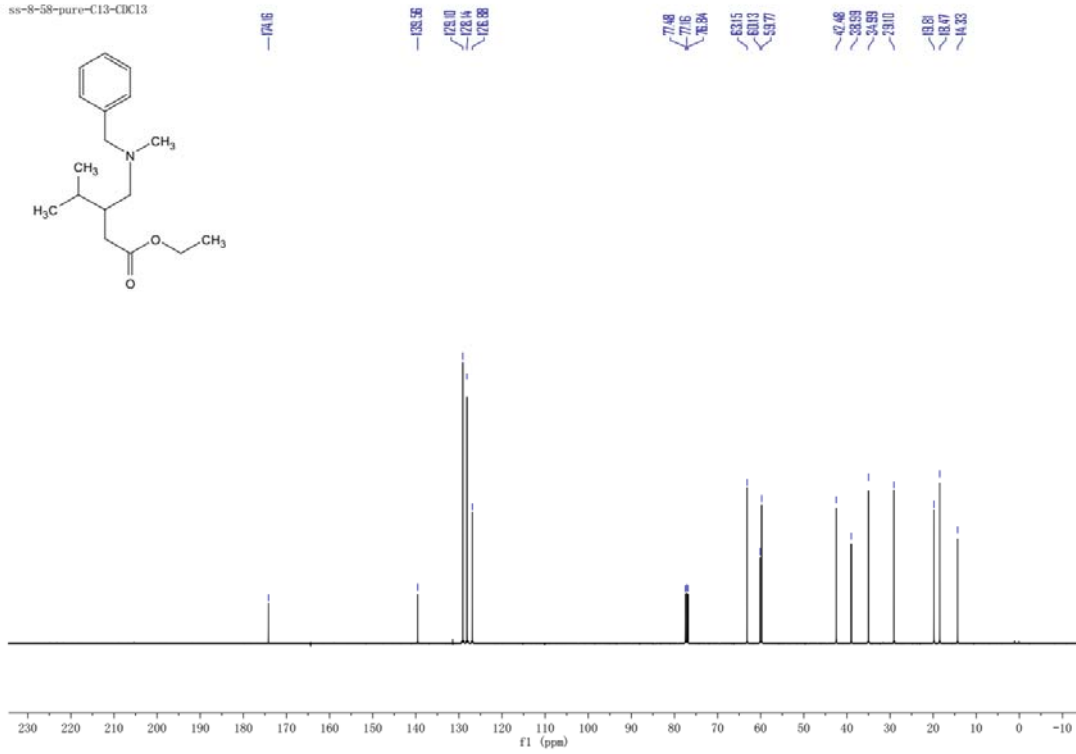

40

ss-8-32B-pure-H-CDCl3  
STANDARD FLUORINE PARAMETERS

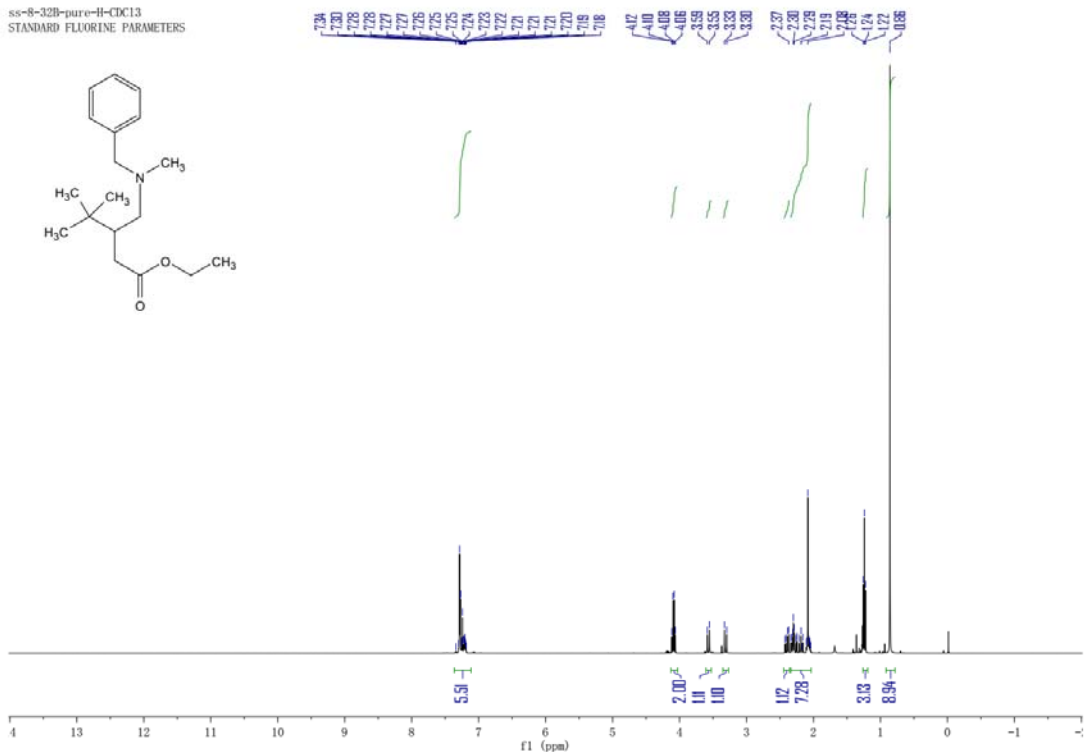

ss-8-32b-pure-C13-CDCl3  
STANDARD FLUORINE PARAMETERS

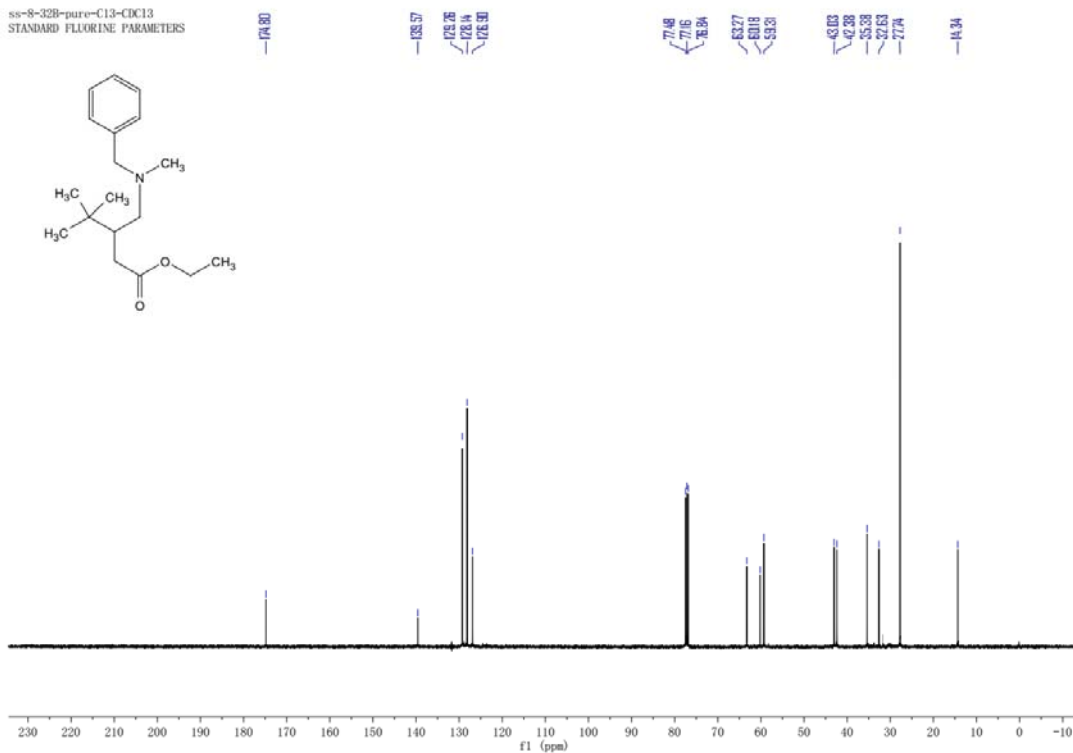

41

ss-8-16-post-pure-II-CDCl3

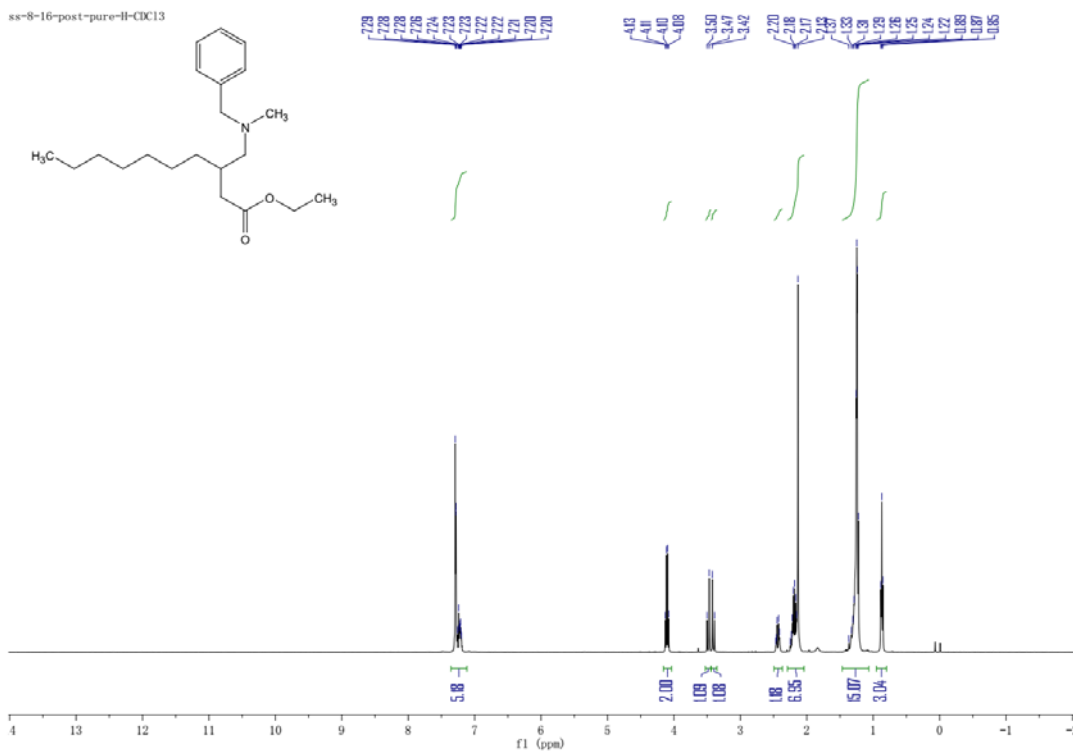



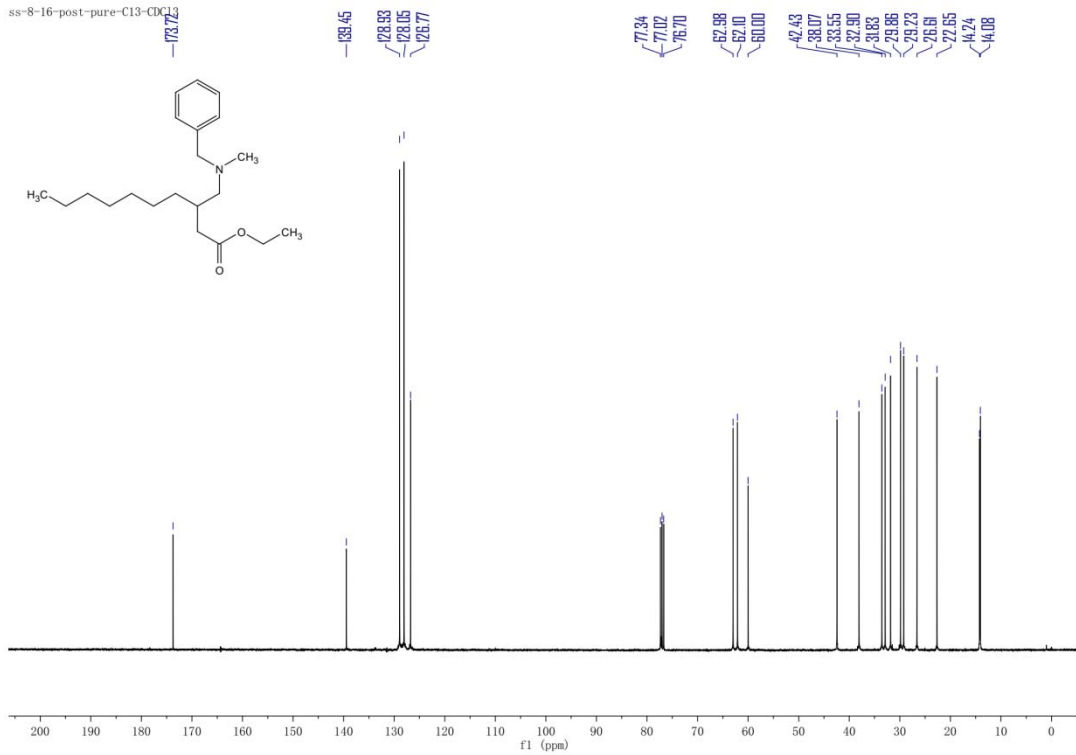

42

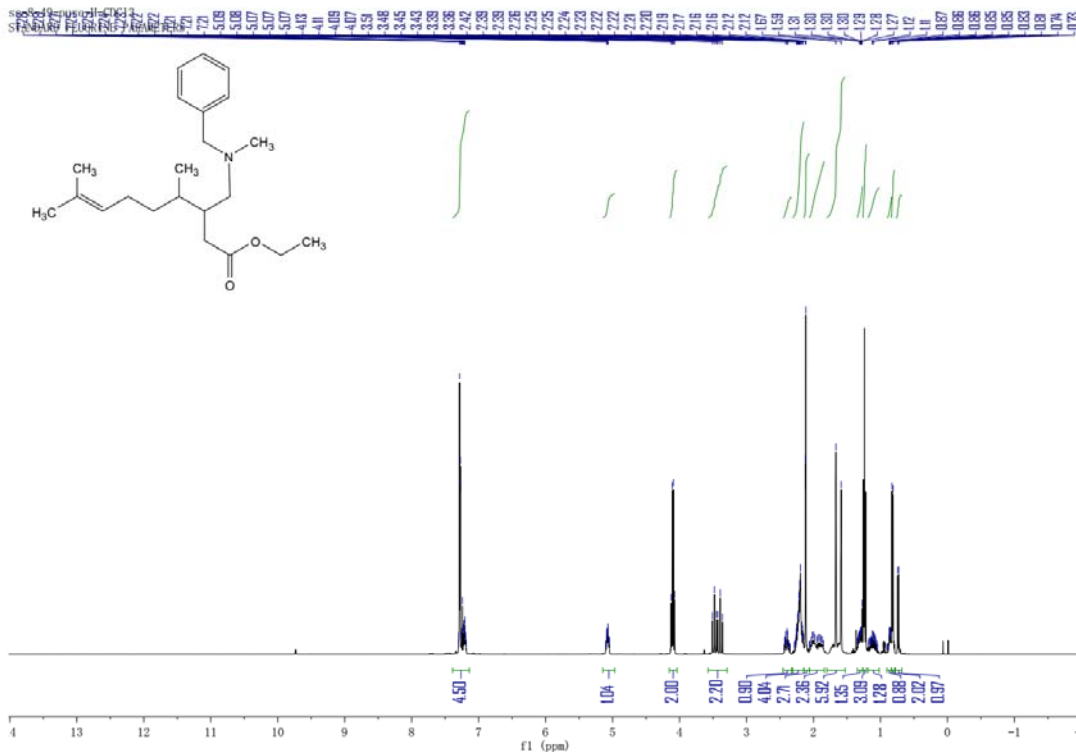

ss-8-49-pure-C13-CDCl3  
STANDARD FLUORINE PARAMETERS

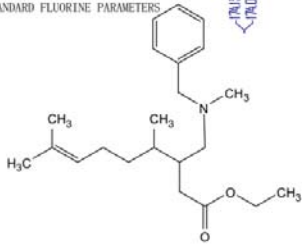

131.62, 131.55, 131.40, 131.34, 131.12, 129.08, 128.17, 128.15, 126.89, 124.79, 124.77, 71.49, 71.6, 75.84, 63.77, 63.06, 62.73, 60.14, 58.81, 47.49, 38.00, 36.04, 34.04, 32.31, 32.29, 31.77, 17.76, 16.00, 15.94, 15.17, 14.55, 14.34

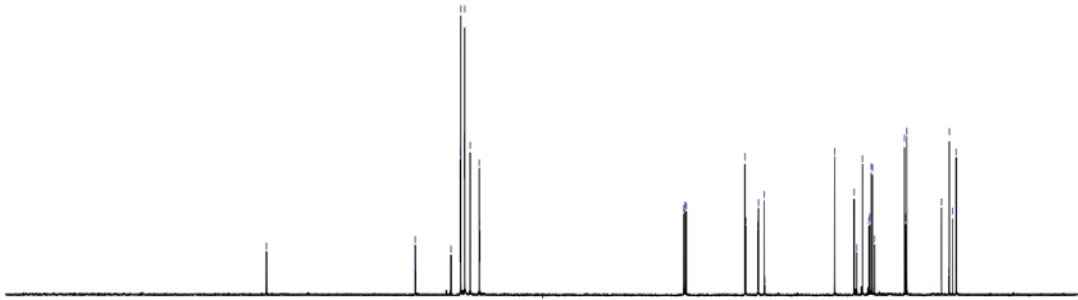

43

ss-8-44-post-H-CDCl3

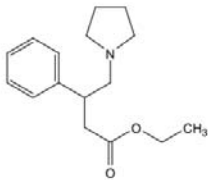

129, 127, 125, 124, 120, 118, 40.2, 4.0, 4.0, 4.0, 3.89, 3.88, 3.37, 3.36, 3.36, 3.35, 2.54, 2.53, 2.3, 2.29, 2.25, 2.23, 1.9, 1.9, 1.09

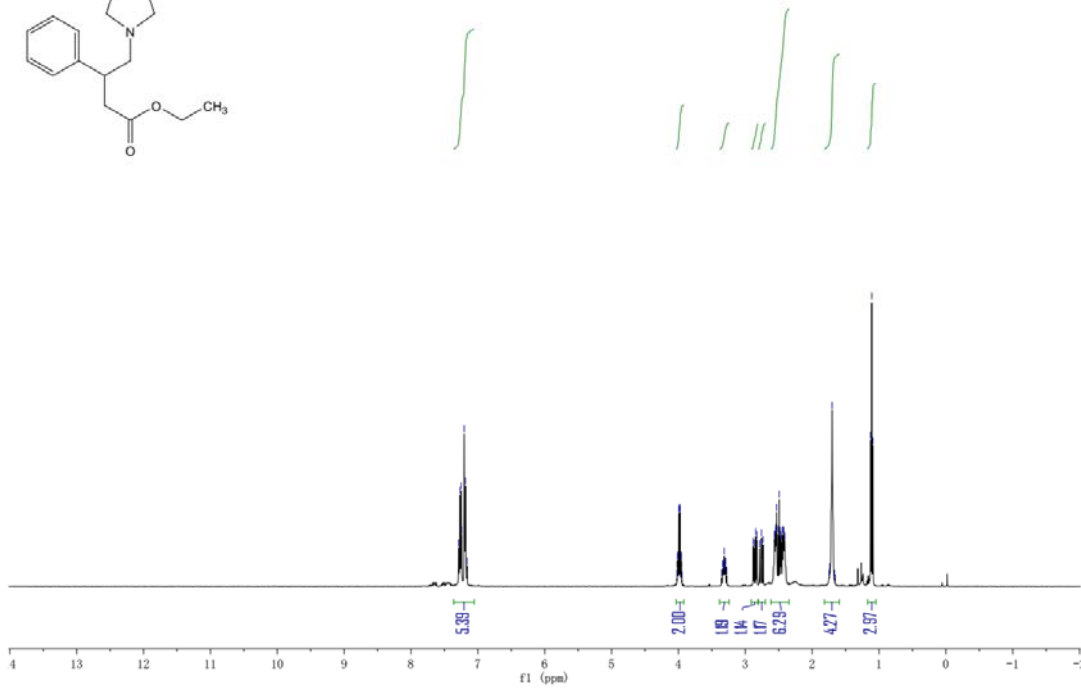

ss-8-44-post-C13-CDCl3

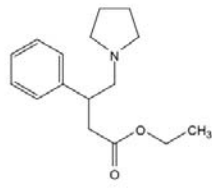

172.78 142.22 128.51 127.98 126.70 77.18 77.05 76.84 57.51 57.20 54.34 41.83 35.72 23.57 14.20

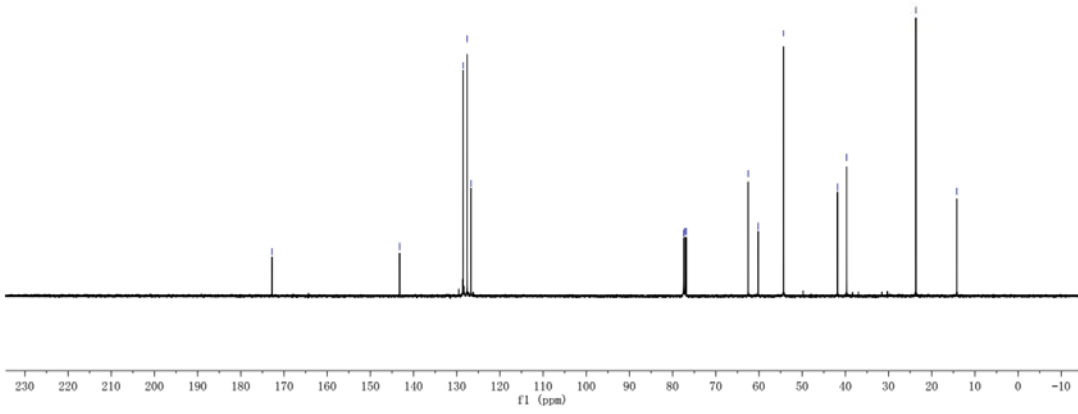

44

ss-8-35-pure-H-CDCl3  
STANDARD FLUORINE PARAMETERS

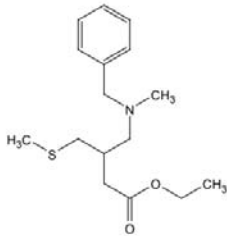

7.23 7.23 7.27 7.25 7.24 7.23 7.22 7.21 7.20 7.19 4.14 4.12 4.10 2.44 2.43 2.42 2.41 2.38 2.36 2.35 2.34 2.33 2.32 2.31 2.30 2.29 2.28 2.27

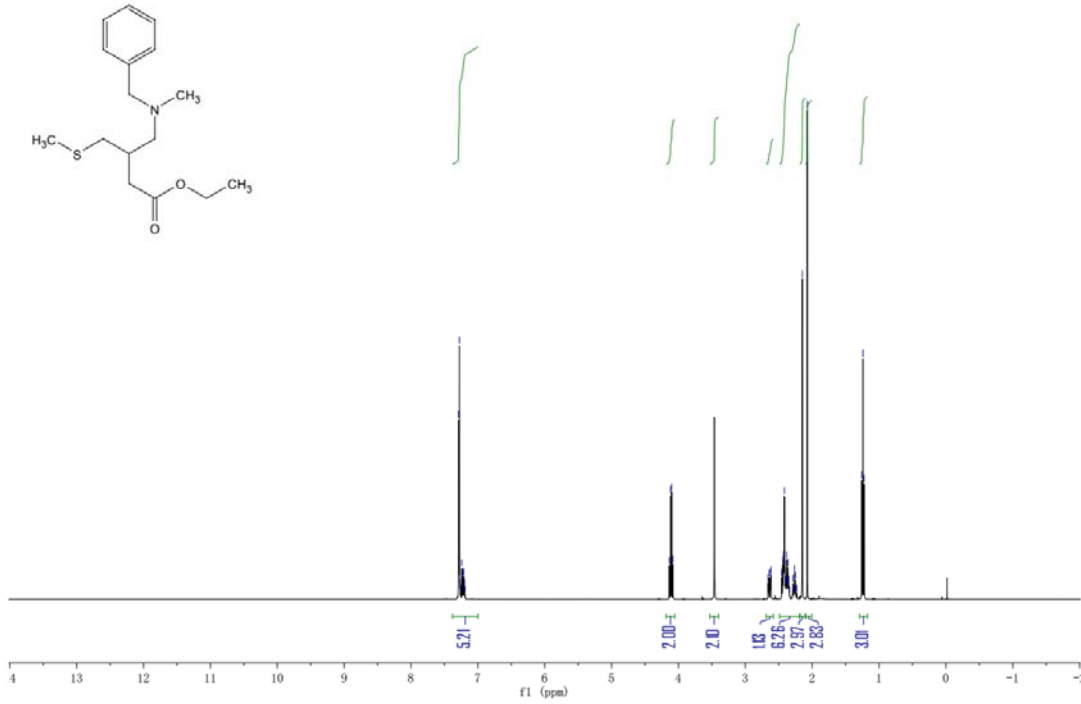

ss-8-35-pure-C13-CDCl3  
STANDARD FLUORINE PARAMETERS

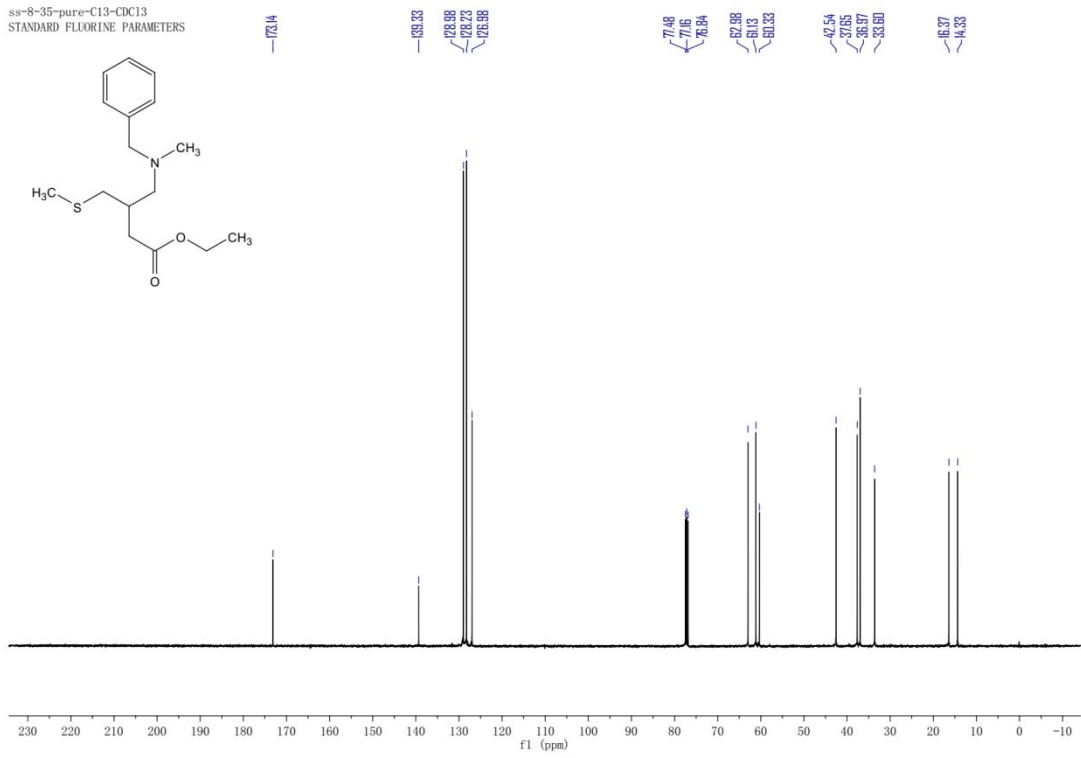

45

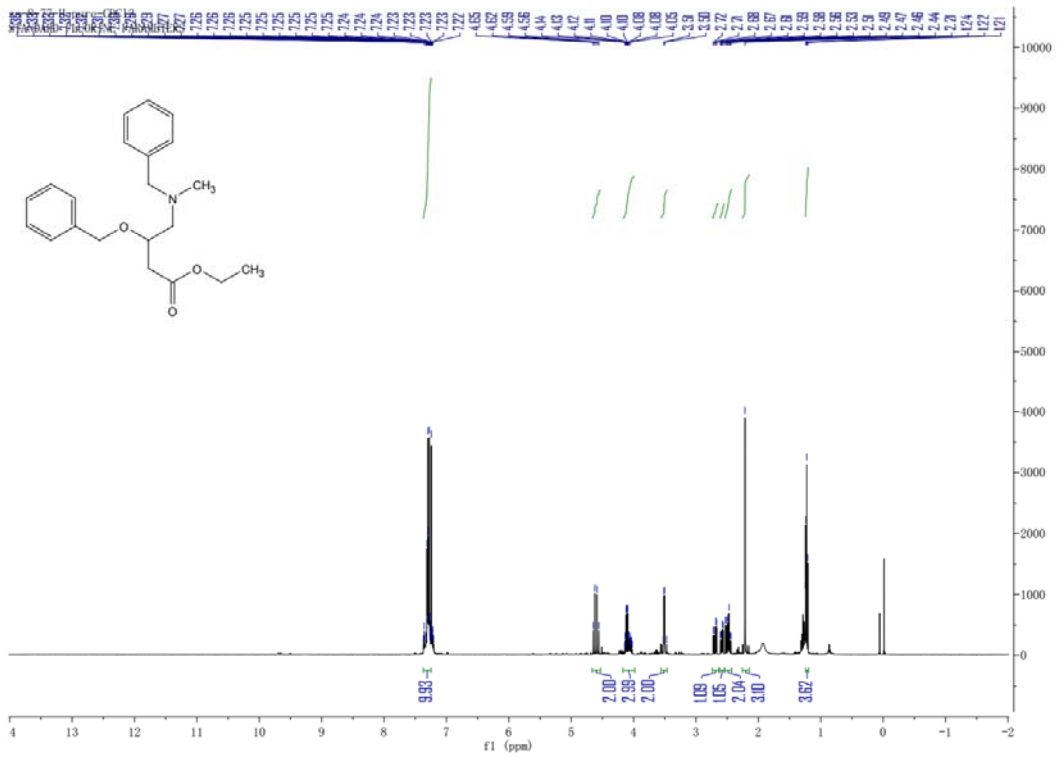

ss-8-77-C13-pure-CDC13  
STANDARD FLUORINE PARAMETERS

-172.85  
-184.44

138.13  
138.87  
139.12  
138.93  
137.83  
137.83  
137.83  
137.74

71.98  
71.66  
71.84  
71.84  
71.78  
71.78  
71.80  
71.84

-63.21  
-33.18

-14.85

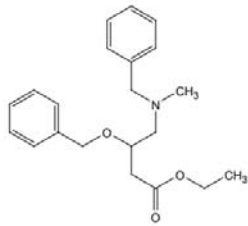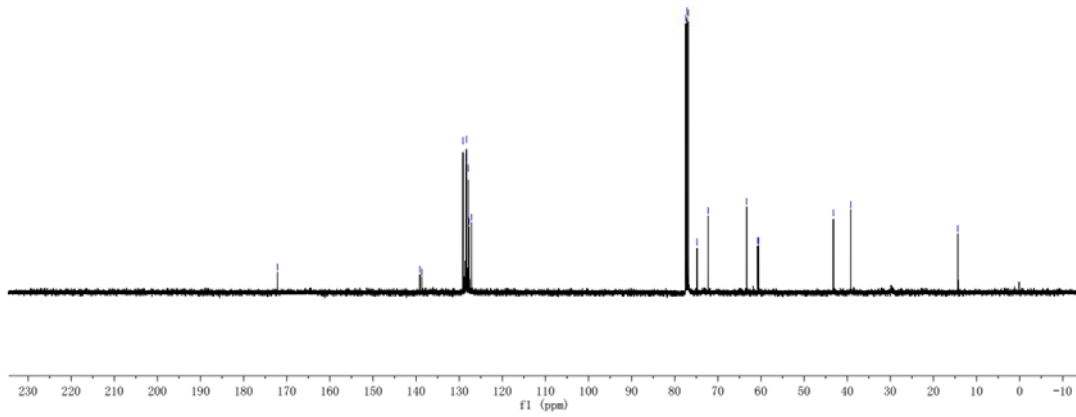

46

5.66  
5.64  
5.62  
5.60  
5.58  
5.56  
5.54  
5.52  
5.50  
5.48  
5.46  
5.44  
5.42  
5.40  
5.38  
5.36  
5.34  
5.32  
5.30  
5.28  
5.26  
5.24  
5.22  
5.20  
5.18  
5.16  
5.14  
5.12  
5.10  
5.08  
5.06  
5.04  
5.02  
5.00  
4.98  
4.96  
4.94  
4.92  
4.90  
4.88  
4.86  
4.84  
4.82  
4.80  
4.78  
4.76  
4.74  
4.72  
4.70  
4.68  
4.66  
4.64  
4.62  
4.60  
4.58  
4.56  
4.54  
4.52  
4.50  
4.48  
4.46  
4.44  
4.42  
4.40  
4.38  
4.36  
4.34  
4.32  
4.30  
4.28  
4.26  
4.24  
4.22

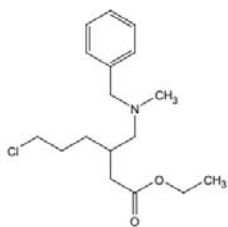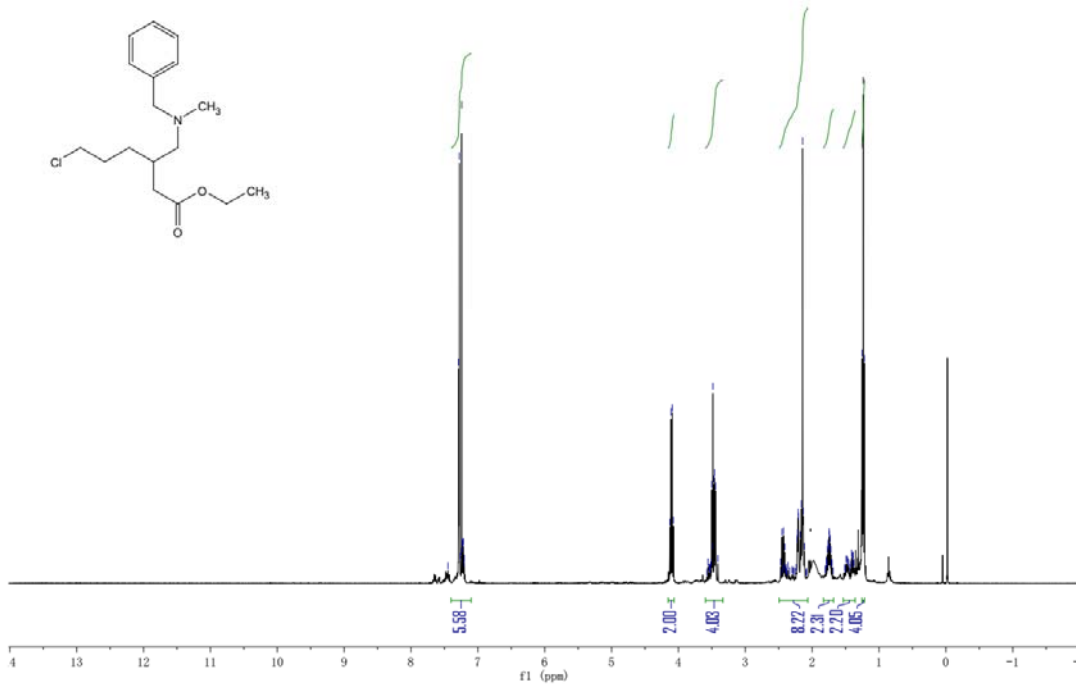

ss-8-73-pure-C13-CDCl3  
STANDARD FLUORINE PARAMETERS

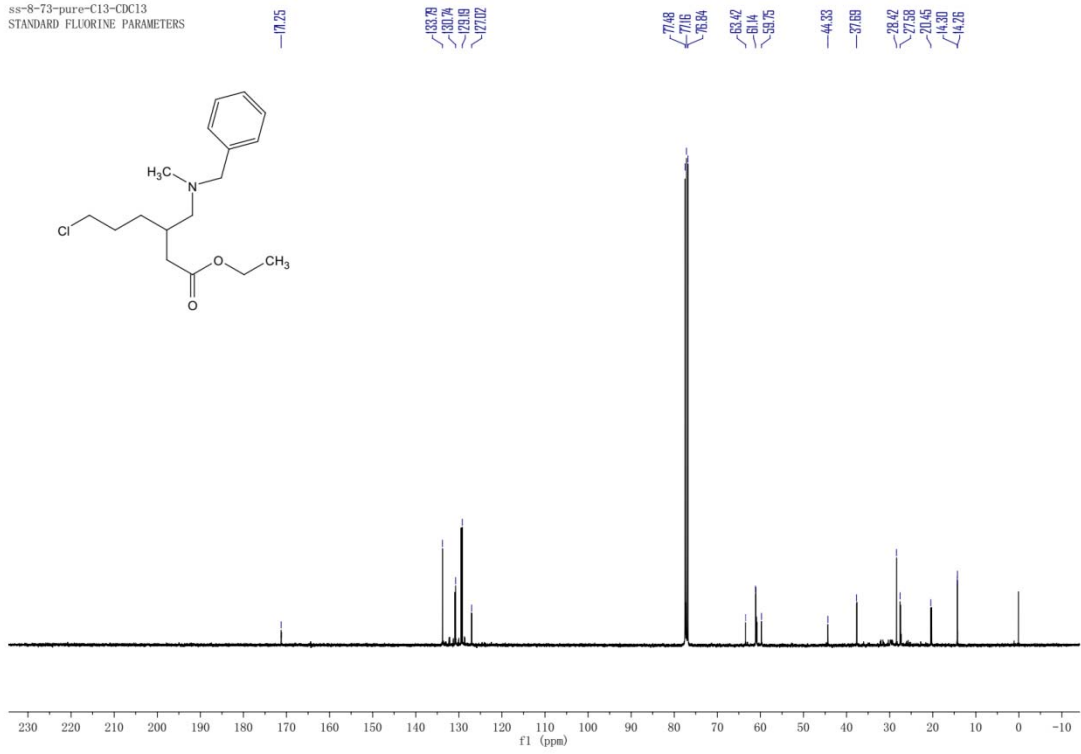

47

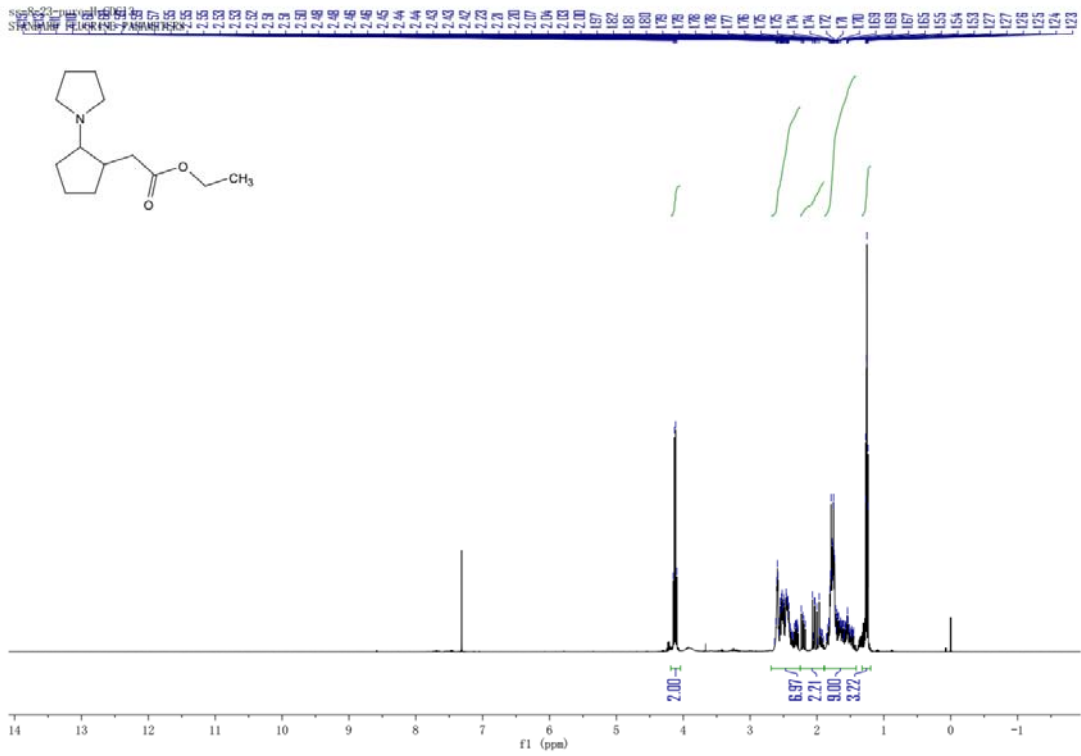

ss-8-23-pure-<sup>13</sup>C-CDCl<sub>3</sub>  
STANDARD FLUORINE PARAMETERS

71.44  
77.07

77.48 76.84 76.84 69.78 60.12 53.29 52.25 40.71 35.13 33.17 31.72 30.30 28.94 28.72 23.77 23.44 23.35 20.36 14.55 14.30

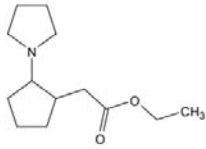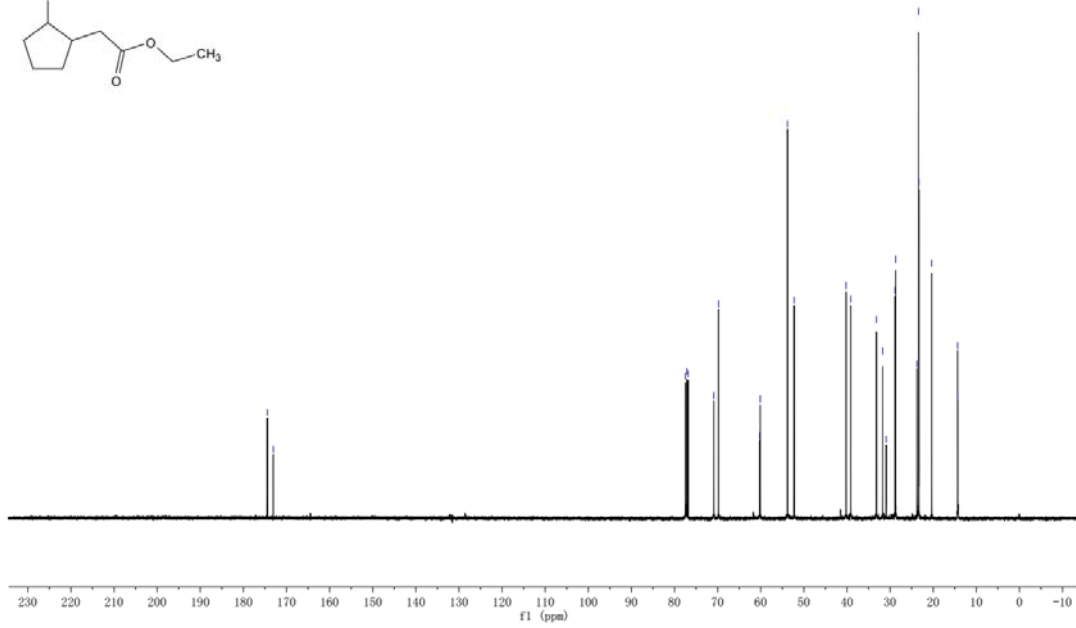

48

ss-8-21-II-pure-<sup>13</sup>C-CDCl<sub>3</sub>  
STANDARD FLUORINE PARAMETERS

4.107 4.105 4.104 4.102 2.867 2.865 2.862 2.858 2.833 2.827 1.177 1.176 1.174 1.172 1.170 1.162 1.159 1.155 1.153 1.133 1.129 1.121 1.119 1.117 1.115

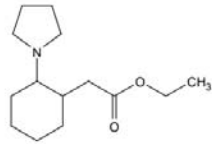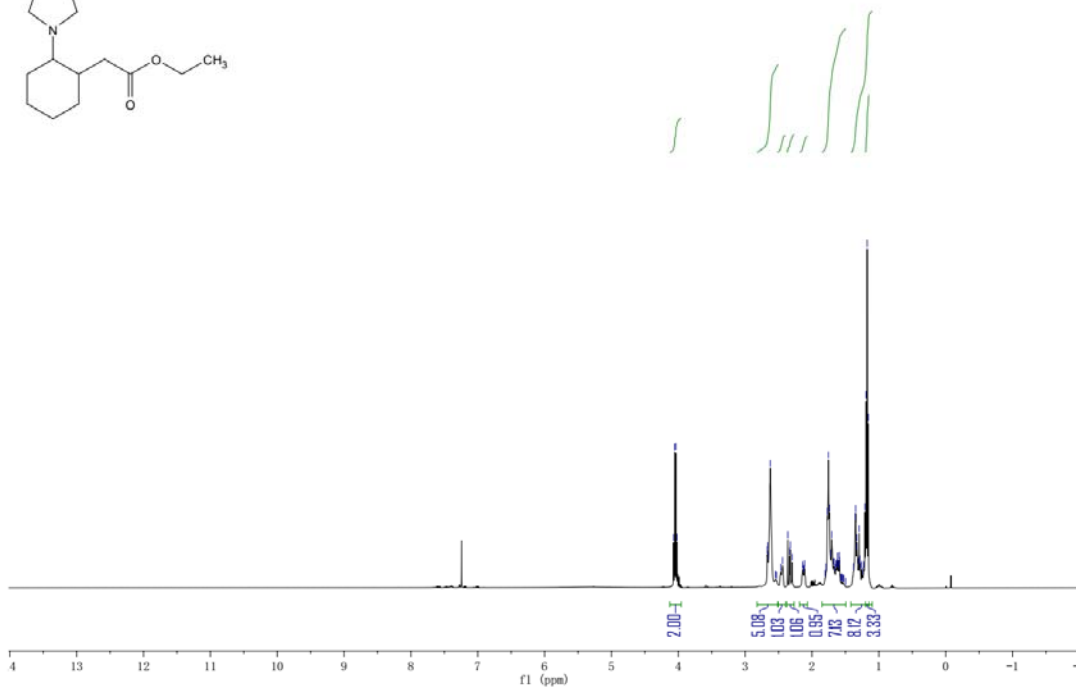





ss-9-27-C13-CDCl3  
STANDARD FLUORINE PARAMETERS

173.95

77.48  
77.06  
76.64  
-53.77  
-53.92  
41.08  
41.02  
39.93  
31.25  
25.60  
25.55  
24.87  
24.85

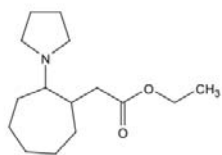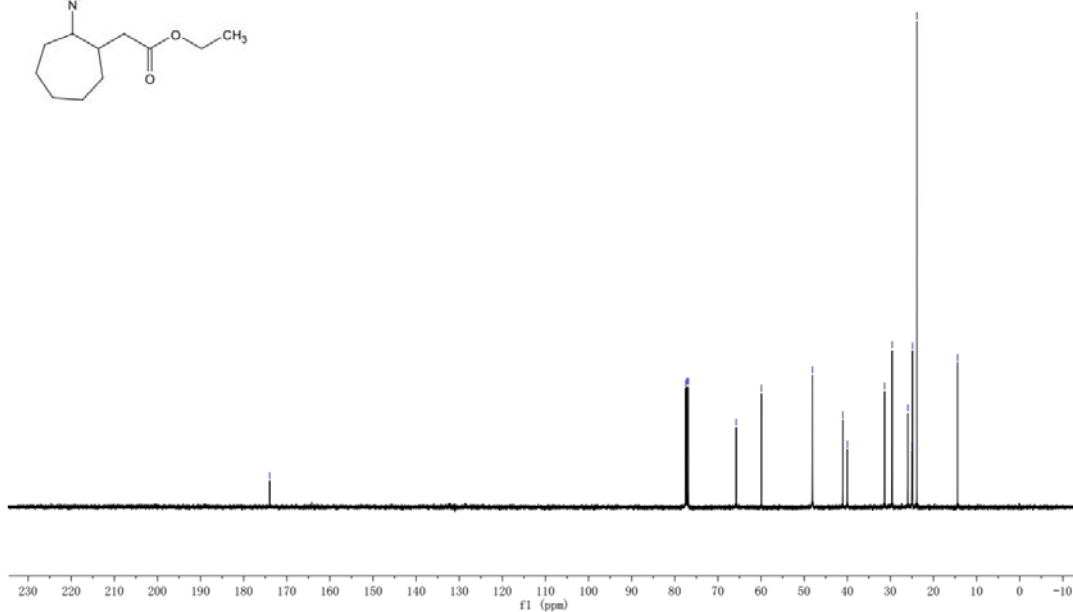

50

173.95  
173.94  
173.93  
173.92  
173.91  
173.90  
173.89  
173.88  
173.87  
173.86  
173.85  
173.84  
173.83  
173.82  
173.81  
173.80  
173.79  
173.78  
173.77  
173.76  
173.75  
173.74  
173.73  
173.72  
173.71  
173.70  
173.69  
173.68  
173.67  
173.66  
173.65  
173.64  
173.63  
173.62  
173.61  
173.60  
173.59  
173.58  
173.57  
173.56  
173.55  
173.54  
173.53  
173.52  
173.51  
173.50  
173.49  
173.48  
173.47  
173.46  
173.45  
173.44  
173.43  
173.42  
173.41  
173.40  
173.39  
173.38  
173.37  
173.36  
173.35  
173.34  
173.33  
173.32  
173.31  
173.30  
173.29  
173.28  
173.27  
173.26  
173.25  
173.24  
173.23  
173.22  
173.21  
173.20  
173.19  
173.18  
173.17  
173.16  
173.15  
173.14  
173.13  
173.12  
173.11  
173.10  
173.09  
173.08  
173.07  
173.06  
173.05  
173.04  
173.03  
173.02  
173.01  
173.00  
172.99  
172.98  
172.97  
172.96  
172.95  
172.94  
172.93  
172.92  
172.91  
172.90  
172.89  
172.88  
172.87  
172.86  
172.85  
172.84  
172.83  
172.82  
172.81  
172.80  
172.79  
172.78  
172.77  
172.76  
172.75  
172.74  
172.73  
172.72  
172.71  
172.70  
172.69  
172.68  
172.67  
172.66  
172.65  
172.64  
172.63  
172.62  
172.61  
172.60  
172.59  
172.58  
172.57  
172.56  
172.55  
172.54  
172.53  
172.52  
172.51  
172.50  
172.49  
172.48  
172.47  
172.46  
172.45  
172.44  
172.43  
172.42  
172.41  
172.40  
172.39  
172.38  
172.37  
172.36  
172.35  
172.34  
172.33  
172.32  
172.31  
172.30  
172.29  
172.28  
172.27  
172.26  
172.25  
172.24  
172.23  
172.22  
172.21  
172.20  
172.19  
172.18  
172.17  
172.16  
172.15  
172.14  
172.13  
172.12  
172.11  
172.10  
172.09  
172.08  
172.07  
172.06  
172.05  
172.04  
172.03  
172.02  
172.01  
172.00  
171.99  
171.98  
171.97  
171.96  
171.95  
171.94  
171.93  
171.92  
171.91  
171.90  
171.89  
171.88  
171.87  
171.86  
171.85  
171.84  
171.83  
171.82  
171.81  
171.80  
171.79  
171.78  
171.77  
171.76  
171.75  
171.74  
171.73  
171.72  
171.71  
171.70  
171.69  
171.68  
171.67  
171.66  
171.65  
171.64  
171.63  
171.62  
171.61  
171.60  
171.59  
171.58  
171.57  
171.56  
171.55  
171.54  
171.53  
171.52  
171.51  
171.50  
171.49  
171.48  
171.47  
171.46  
171.45  
171.44  
171.43  
171.42  
171.41  
171.40  
171.39  
171.38  
171.37  
171.36  
171.35  
171.34  
171.33  
171.32  
171.31  
171.30  
171.29  
171.28  
171.27  
171.26  
171.25  
171.24  
171.23  
171.22

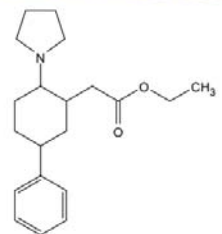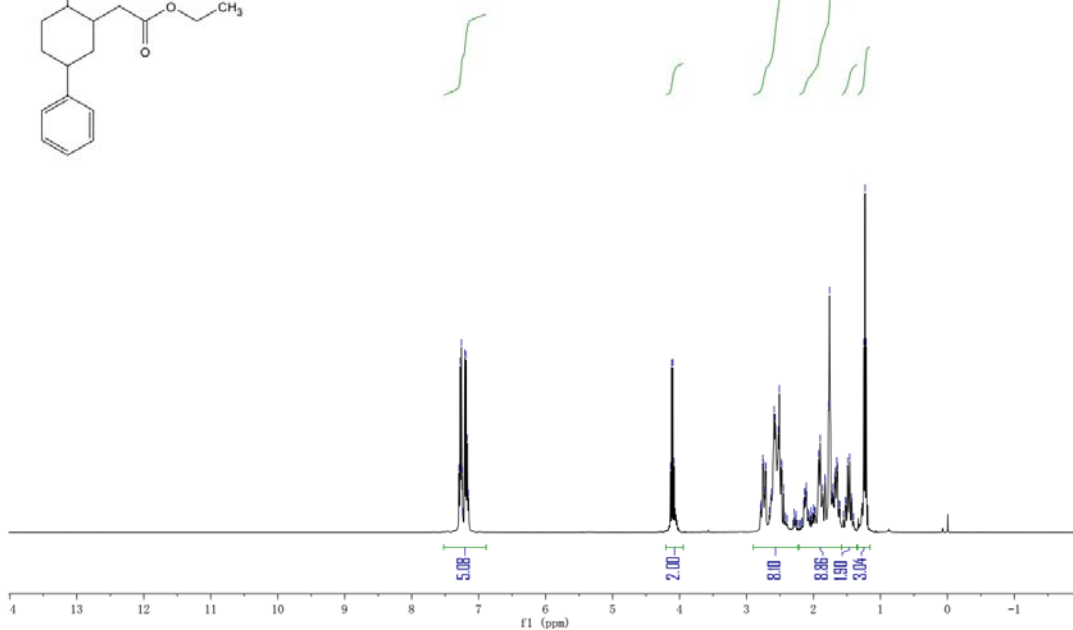

ss-9-4-pure-C13-CDCl3  
 Calibration for ATB on 08Jun2020  
 Sample : C13 enriched CH3I in CDCl3

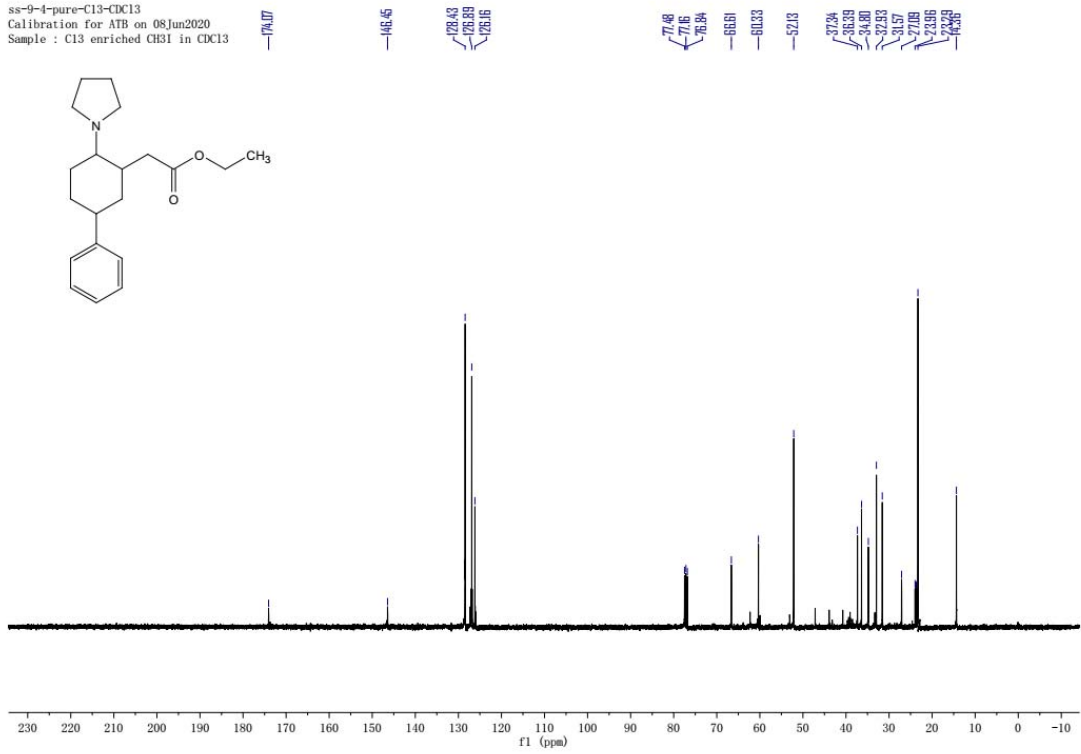

51

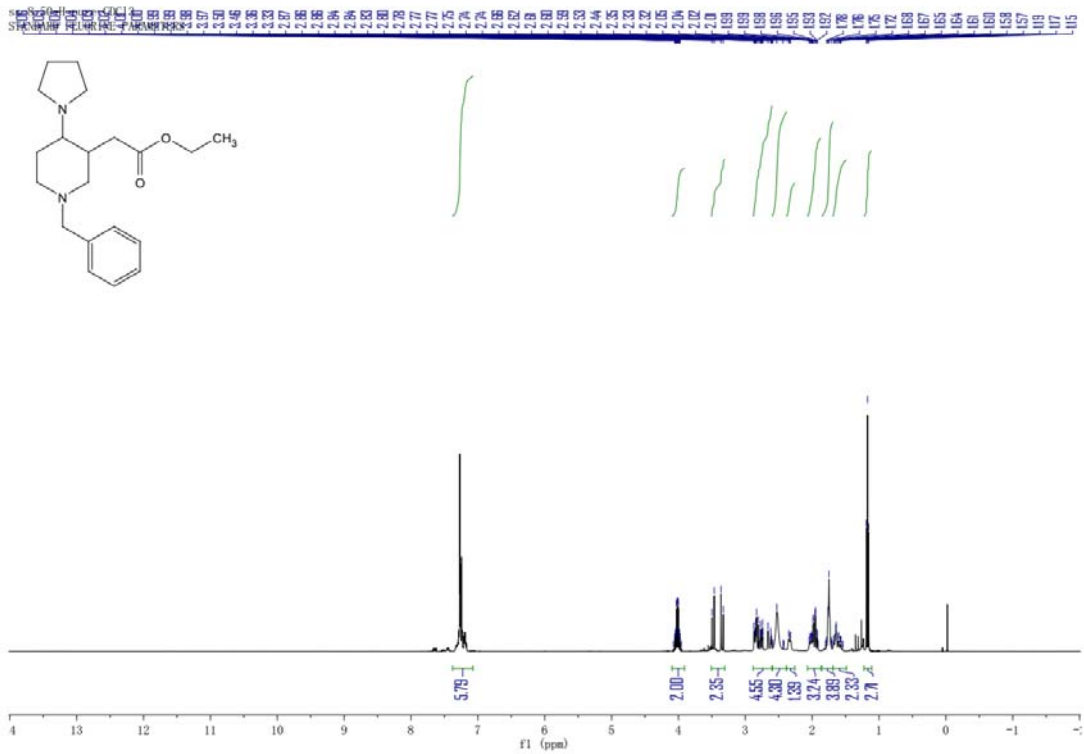

ss-8-50-C13-pure-CDCl3  
STANDARD FLUORINE PARAMETERS

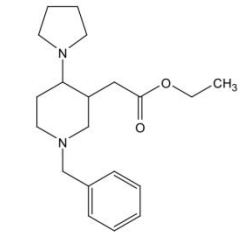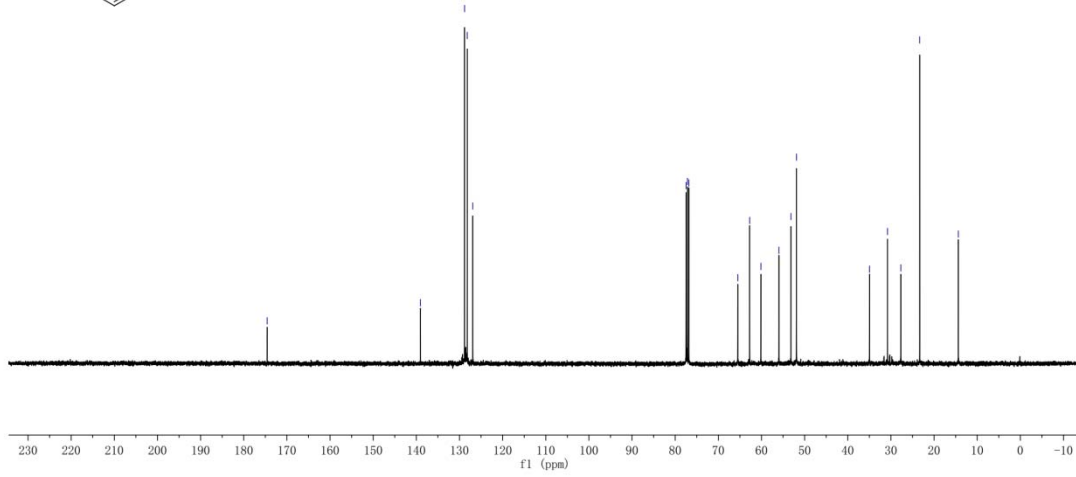

52

ss-9-92-pure5-H-CDCl3  
STANDARD FLUORINE PARAMETERS

Selective band center: -0.00 (ppm); width: 10.0 (Hz)

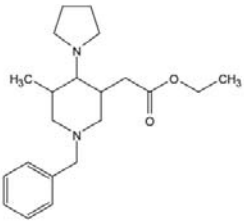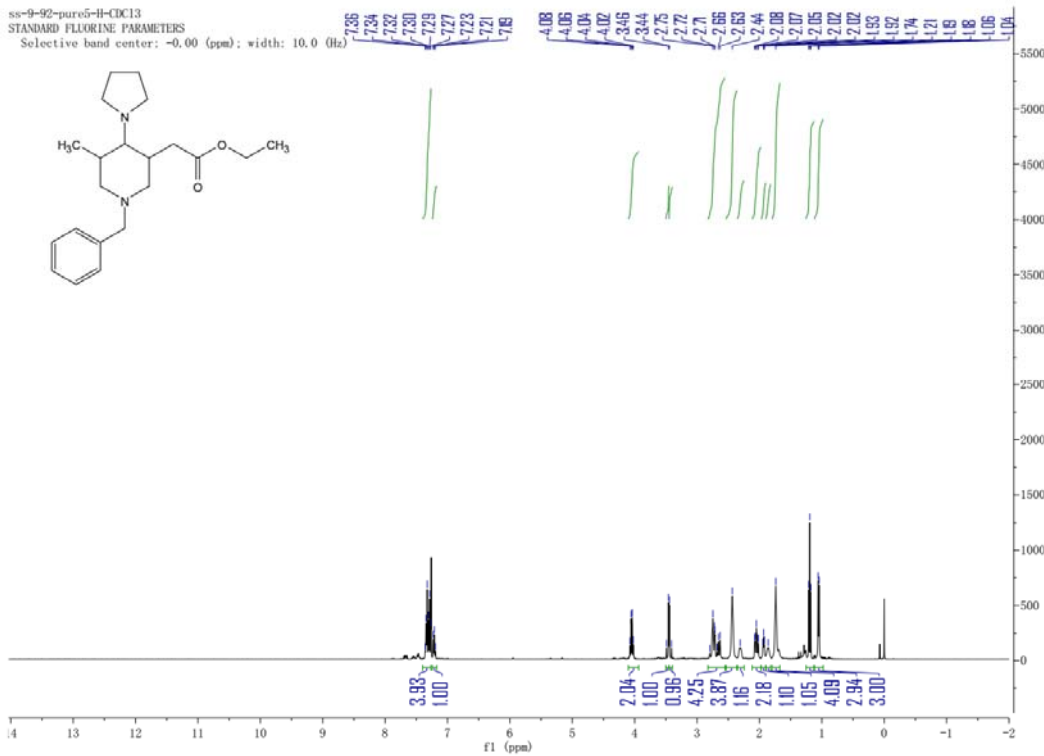

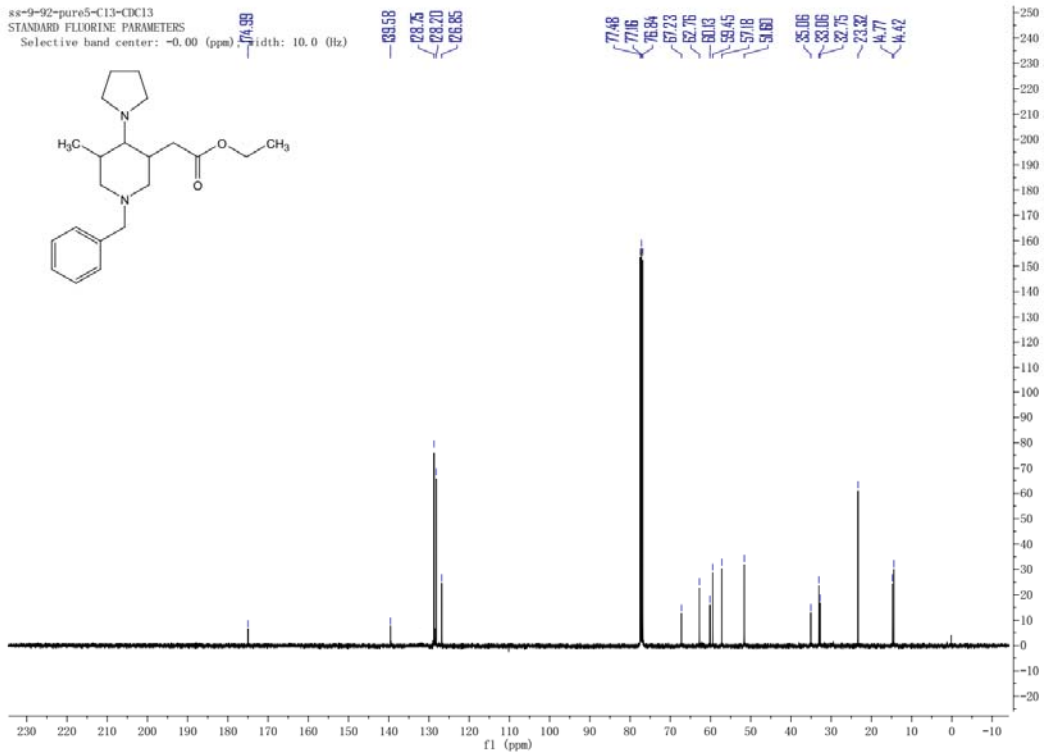

53

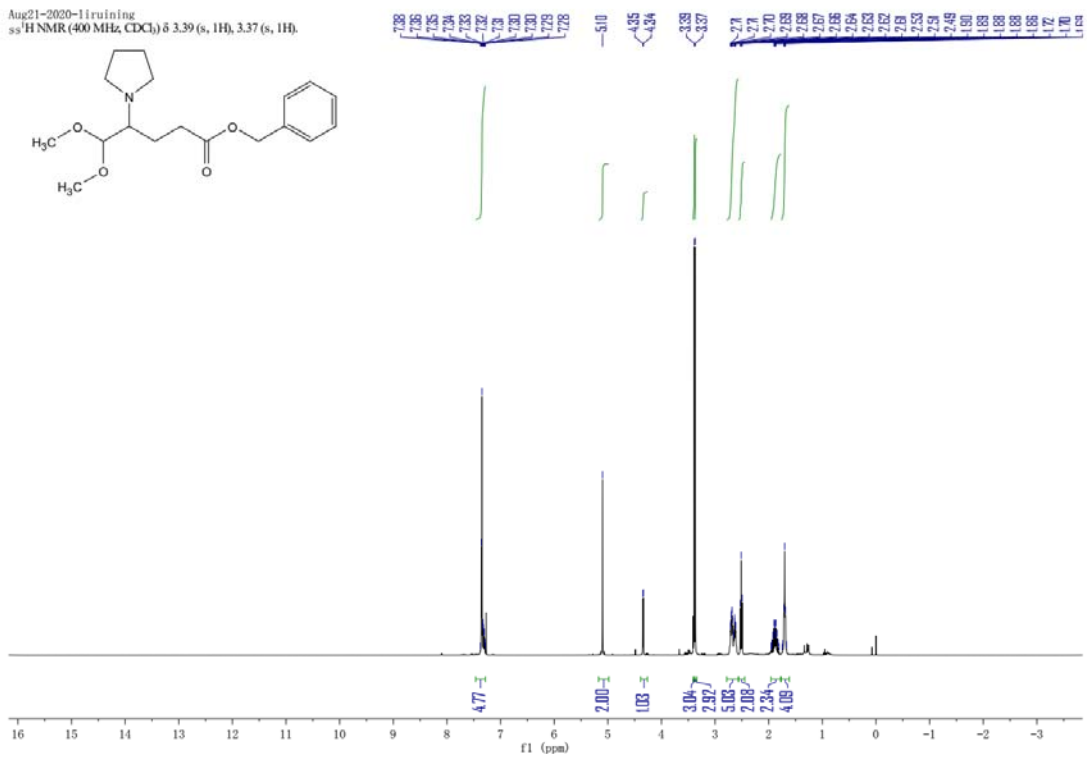



ss-8-13-pure-C13-CDCl3

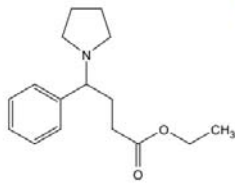

173.74

142.24

133.40

133.27

127.34

77.48

77.06

76.84

71.75

61.35

52.81

31.97

31.81

23.33

14.34

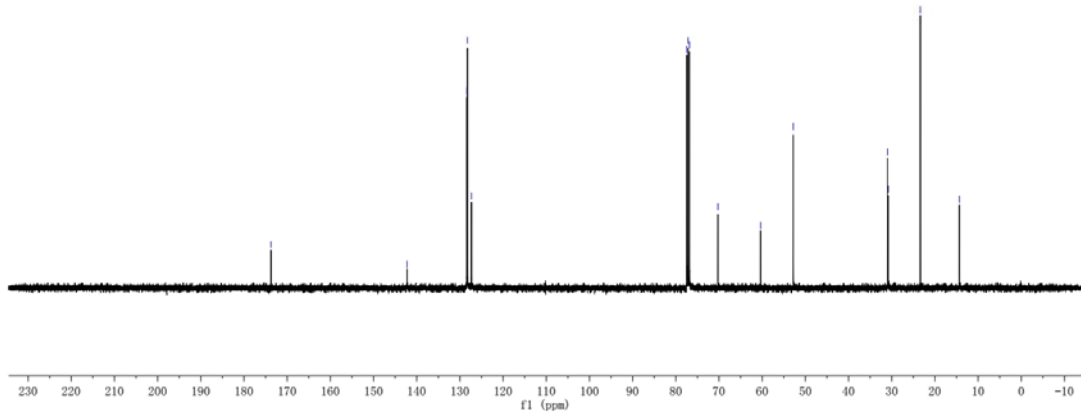

55

ss-9-28-pure-H-CDCl3  
STANDARD FLUORINE PARAMETERS

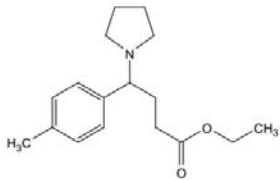

7.21

7.15

7.12

7.10

4.06

4.05

4.03

4.01

3.26

3.25

2.3

2.18

2.18

1.83

1.78

1.75

1.18

1.16

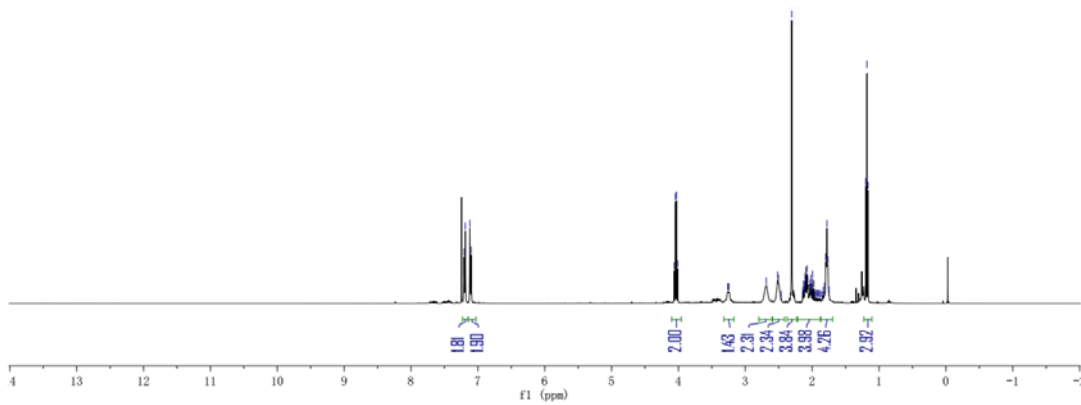

ss-9-28-pure-C13-CDCl3  
STANDARD FLUORINE PARAMETERS

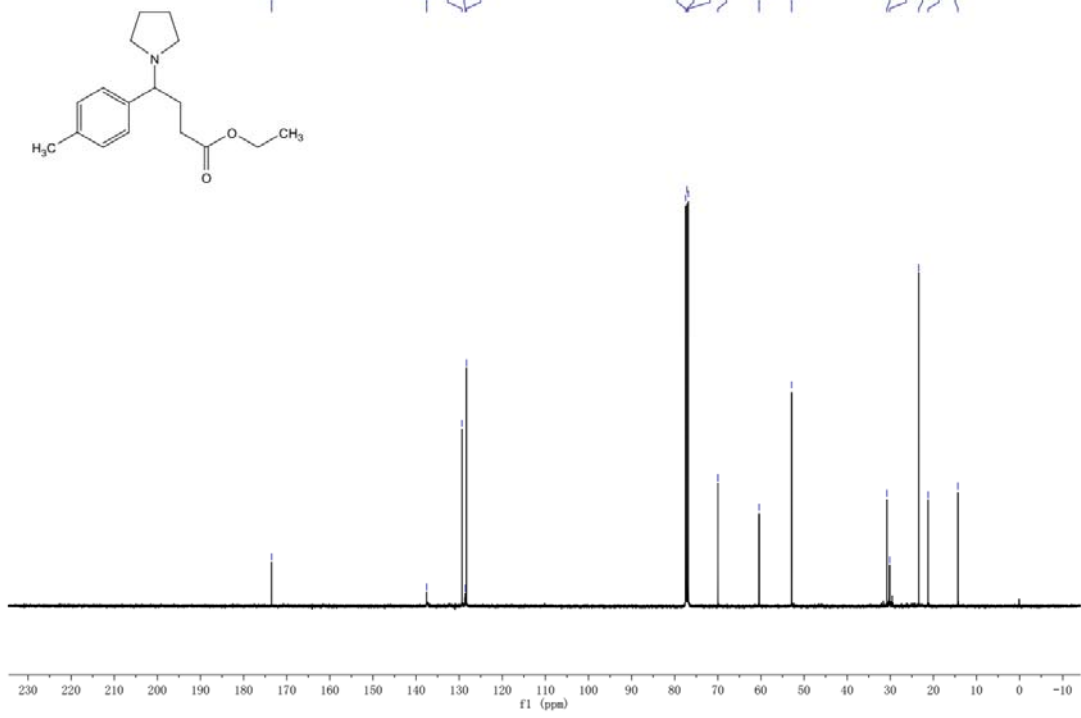

56

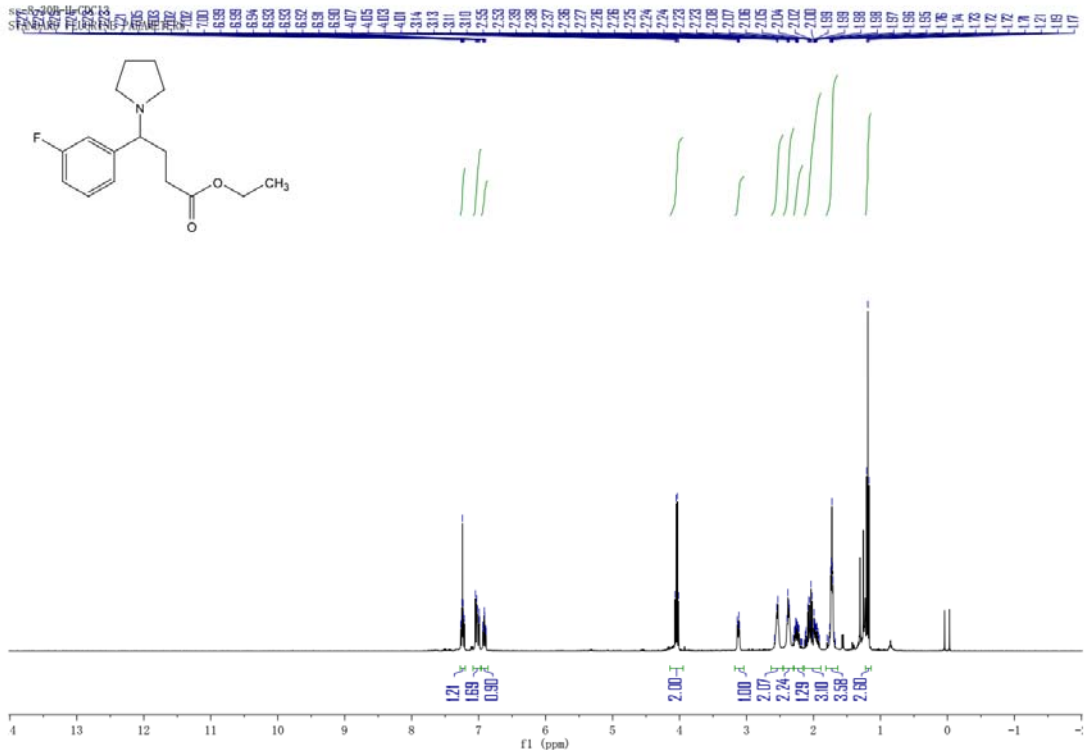

ss-8-308-C13-CDCl3  
STANDARD FLUORINE PARAMETERS

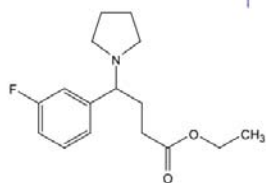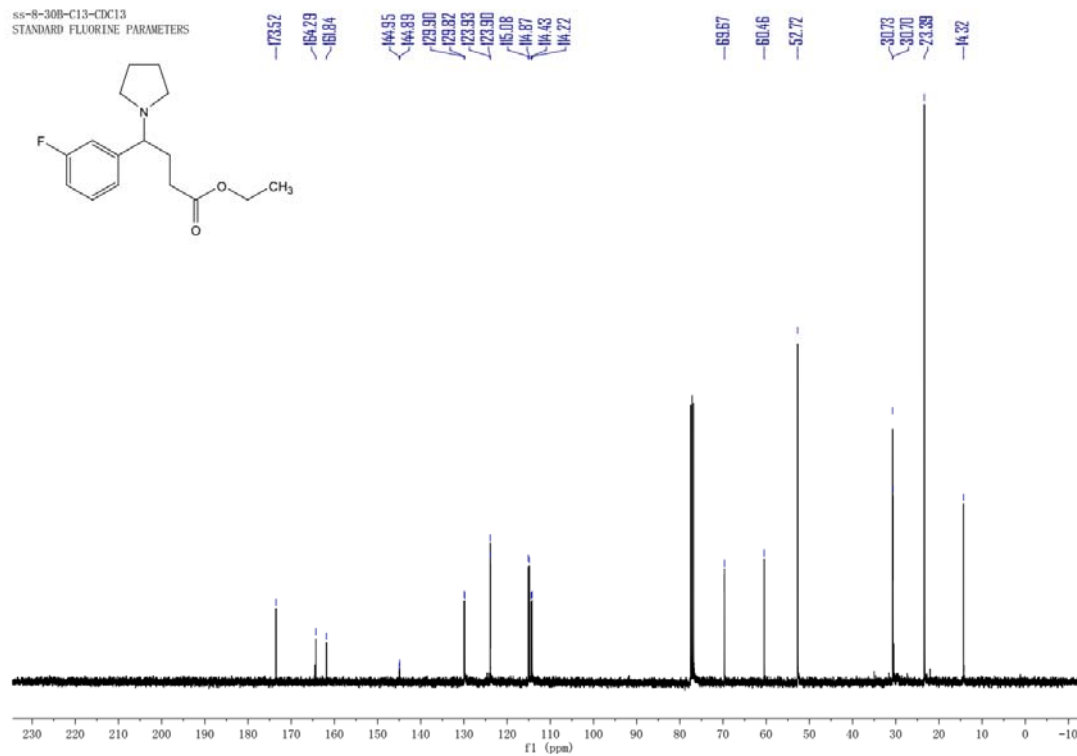

ss-8-308-F-CDCl3  
STANDARD FLUORINE PARAMETERS

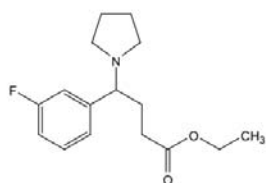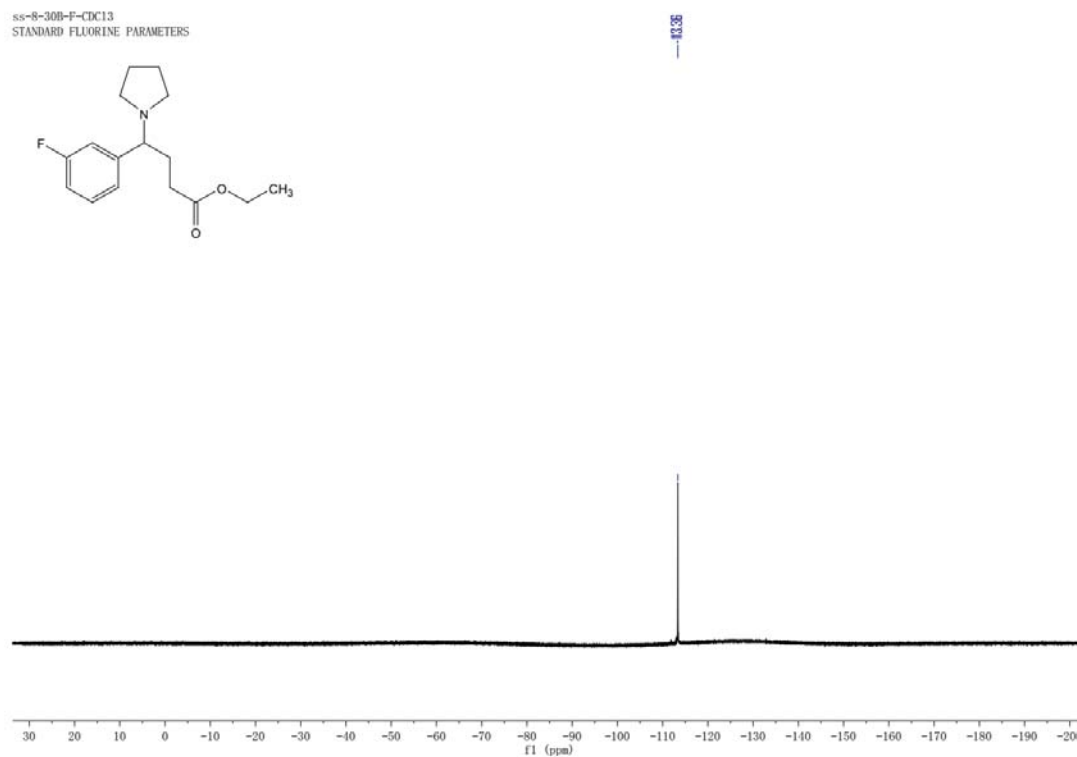



57

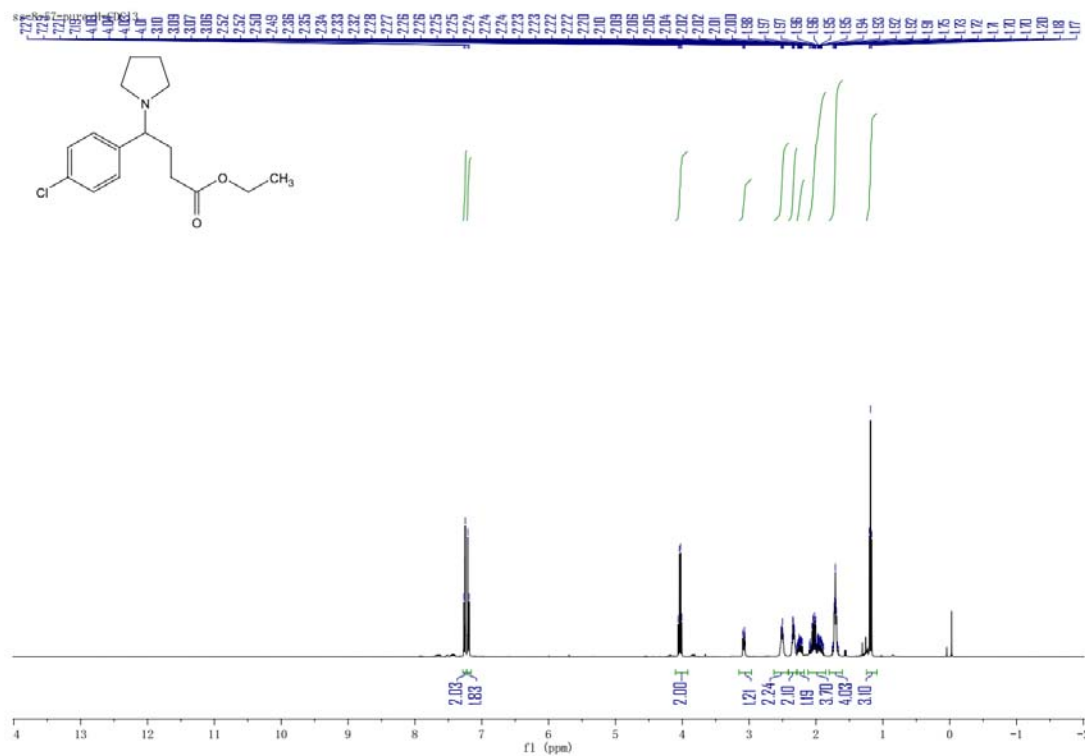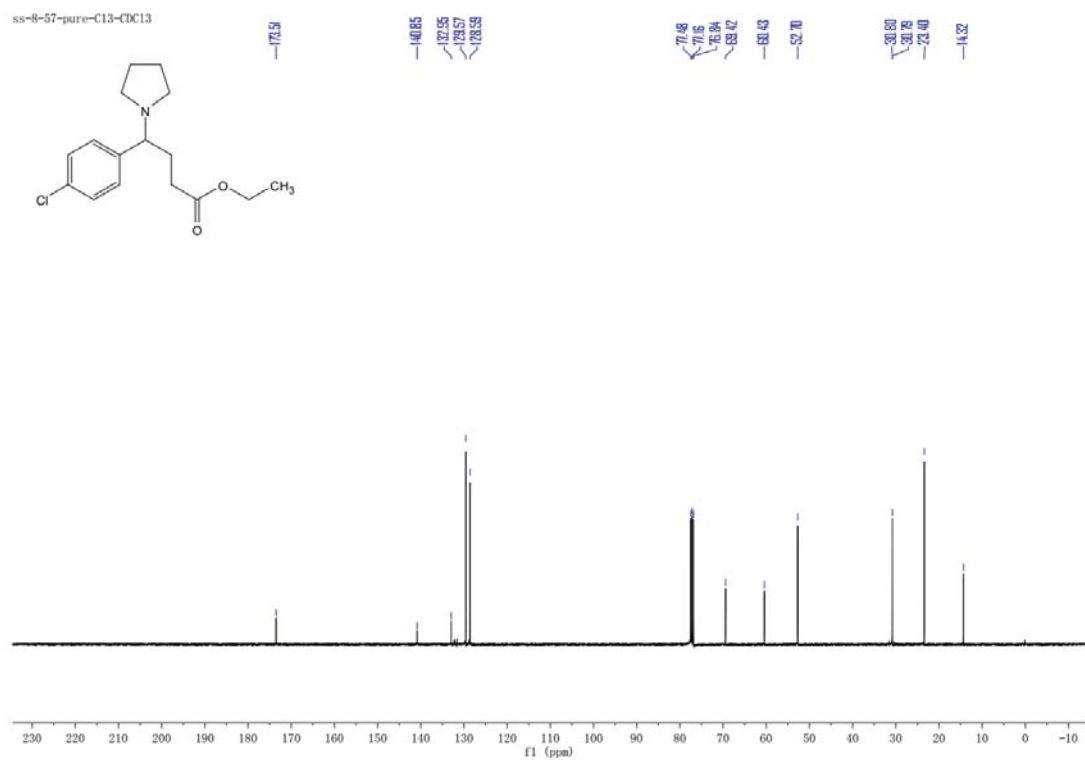

ss-8-47-pure-II-CDCl<sub>3</sub>  
STANDARD FLUORINE PARAMETERS

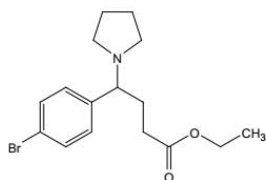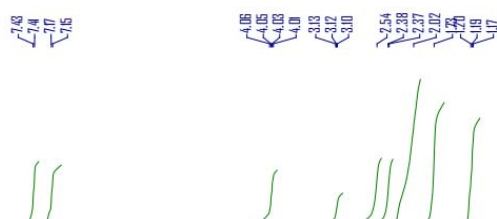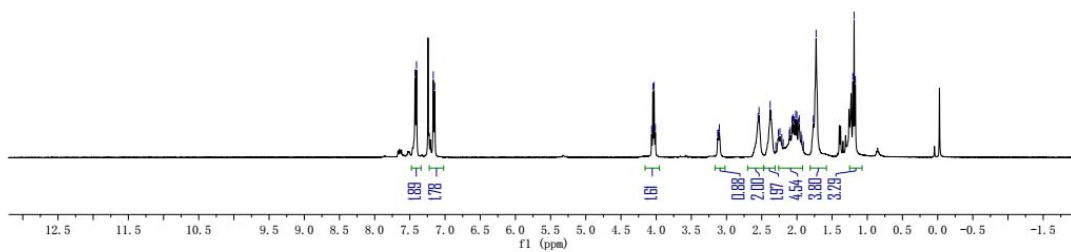

ss-8-47-pure-C13-CDCl<sub>3</sub>

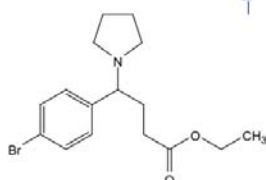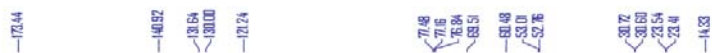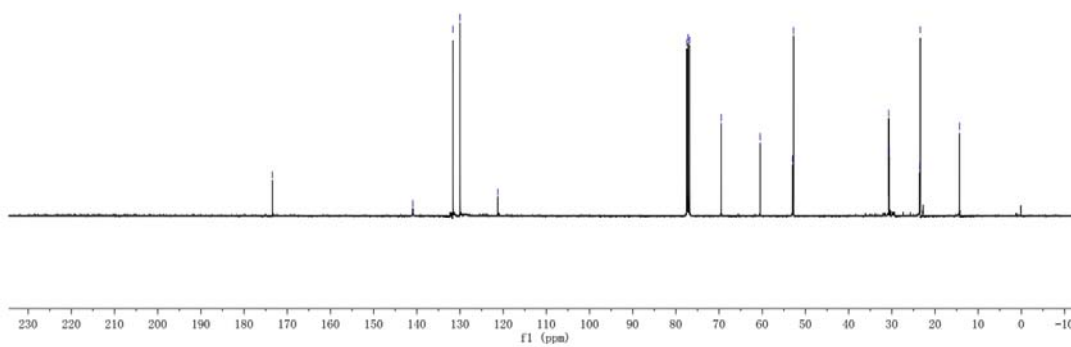

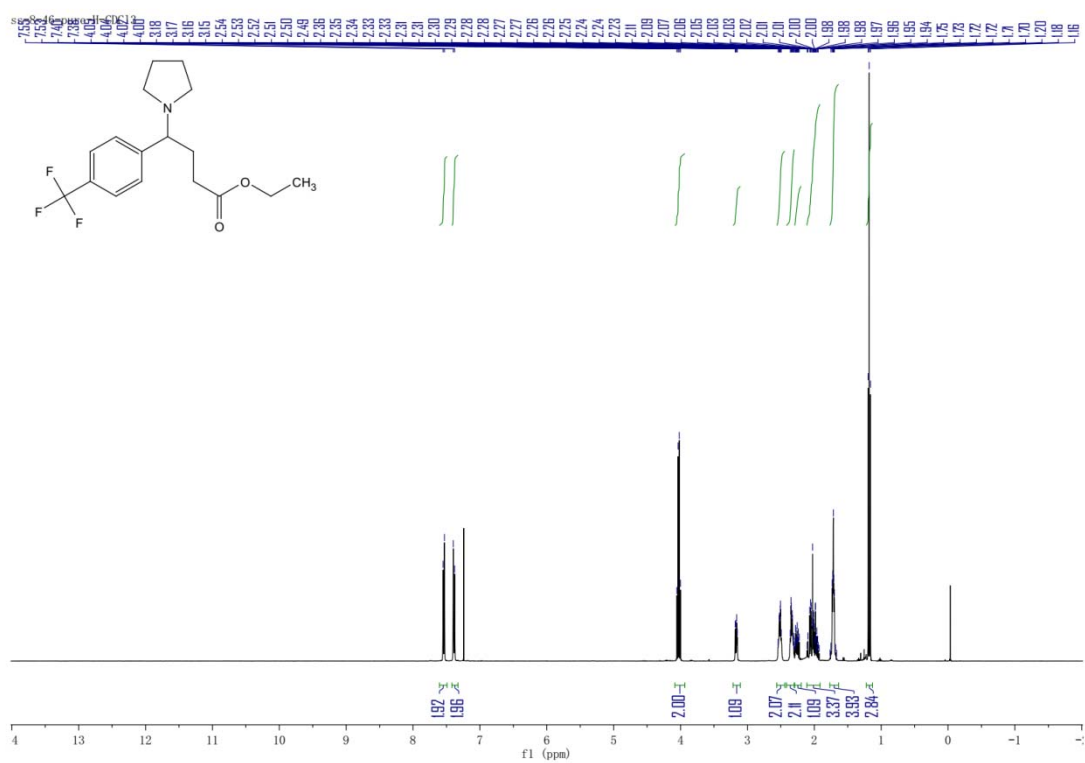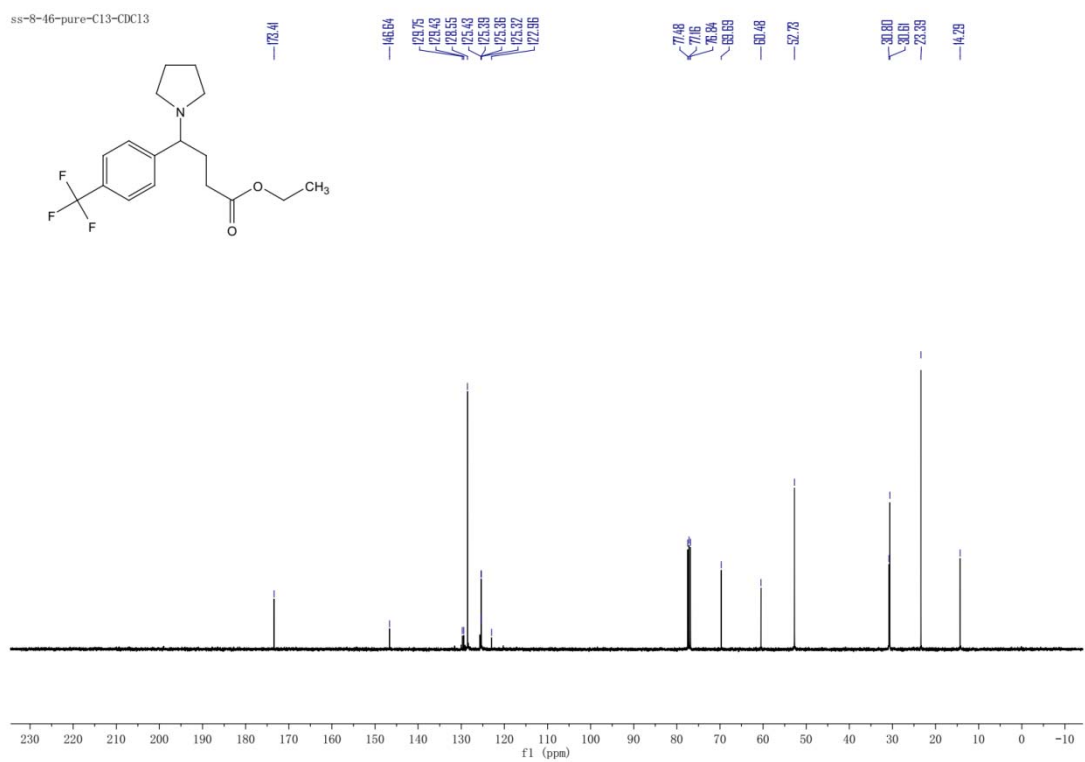



ss-8-42-pure-C13-CDCl3  
STANDARD FLUORINE PARAMETERS

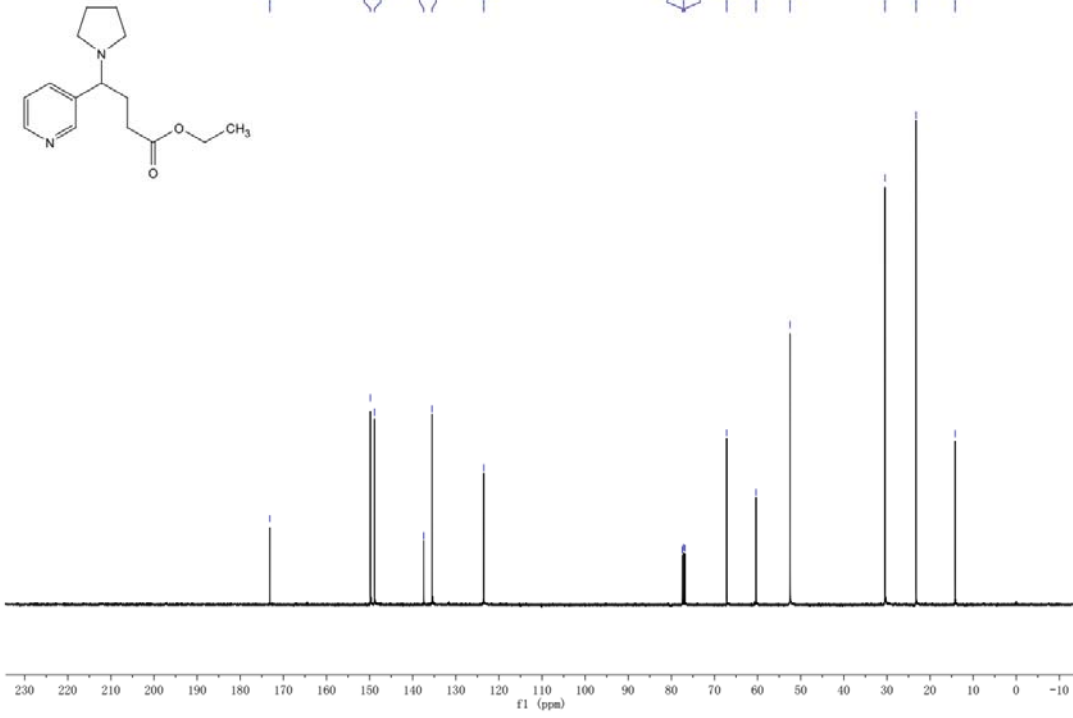

61

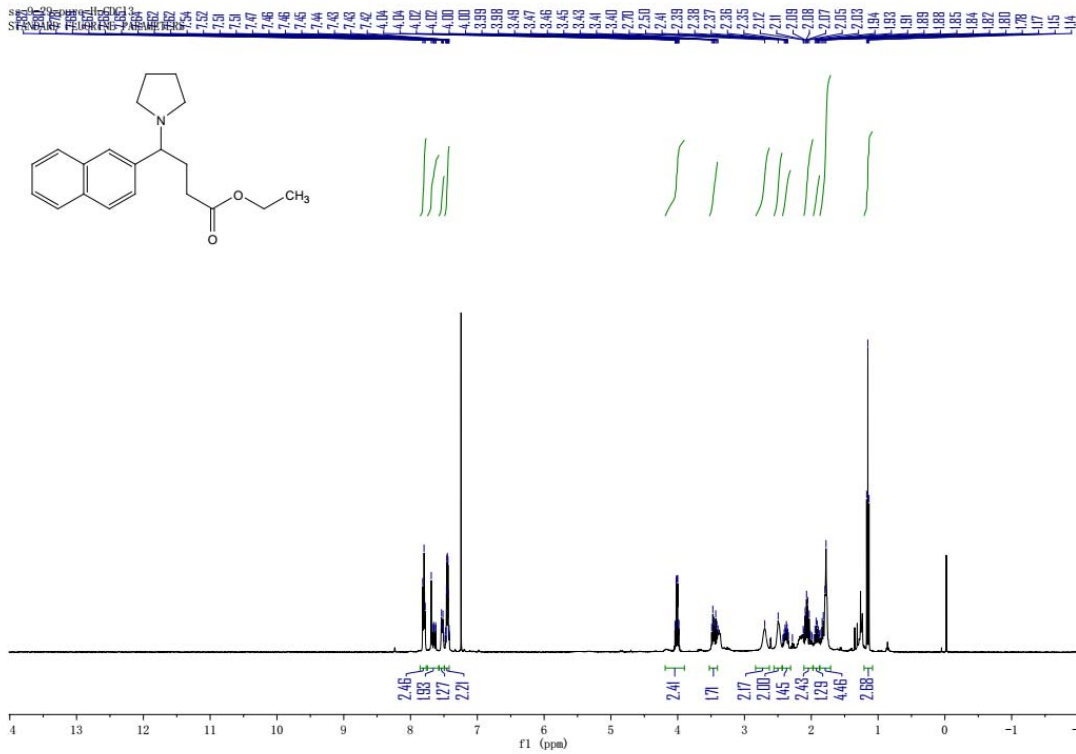

ss-9-29-pure-C13-CDCl3  
STANDARD FLUORINE PARAMETERS

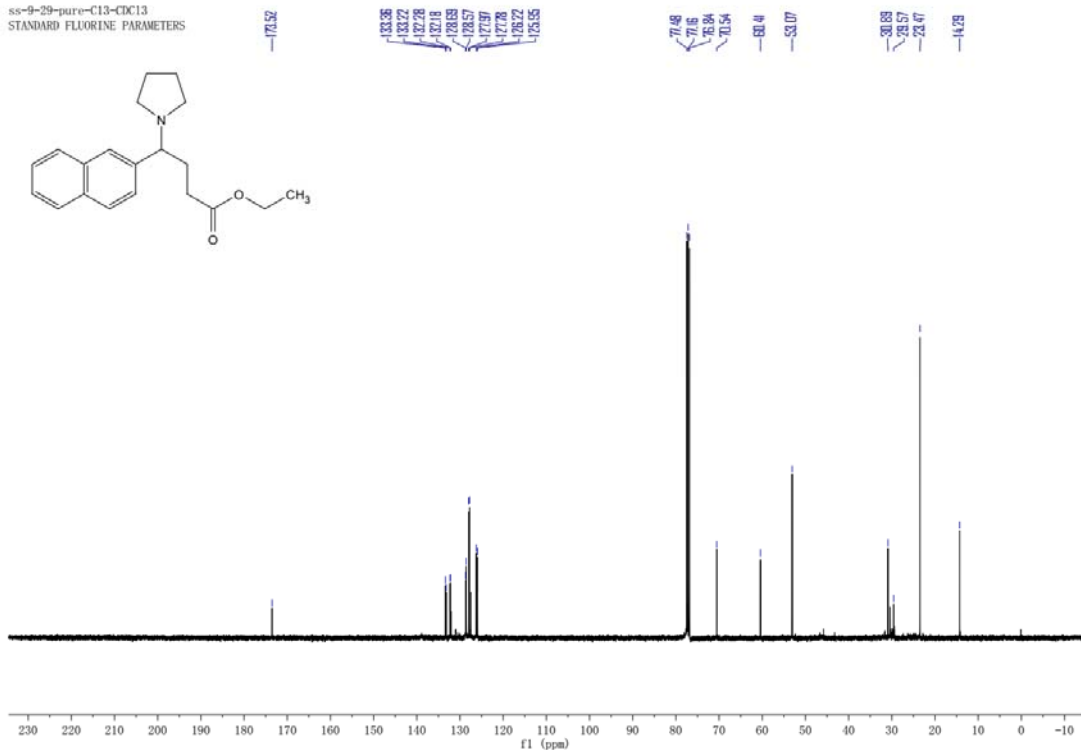

62

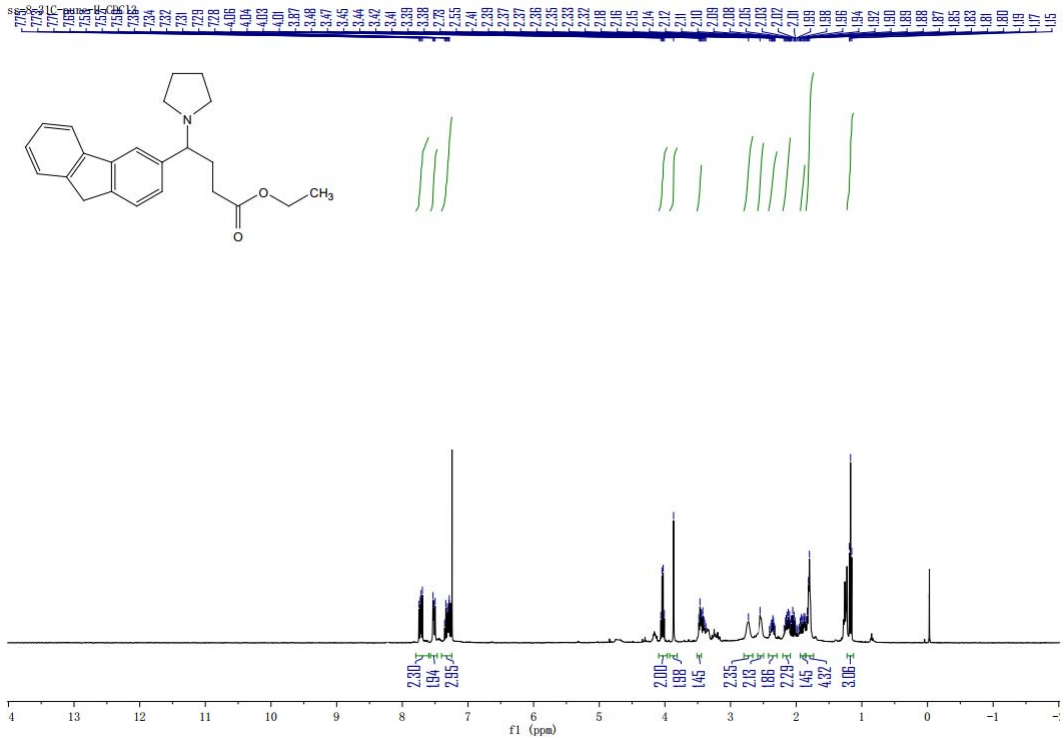



ss-8-82-C13-pure-CDCl3  
STANDARD FLUORINE PARAMETERS

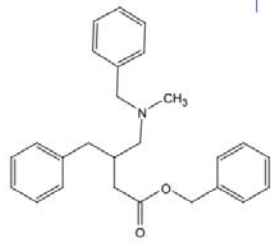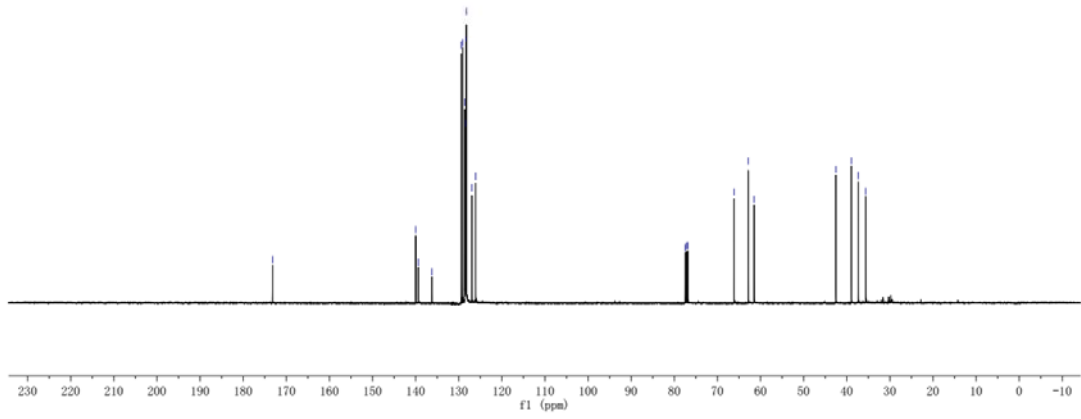

63

ss-8-910-1  
STANDARD FLUORINE PARAMETERS

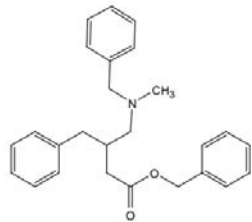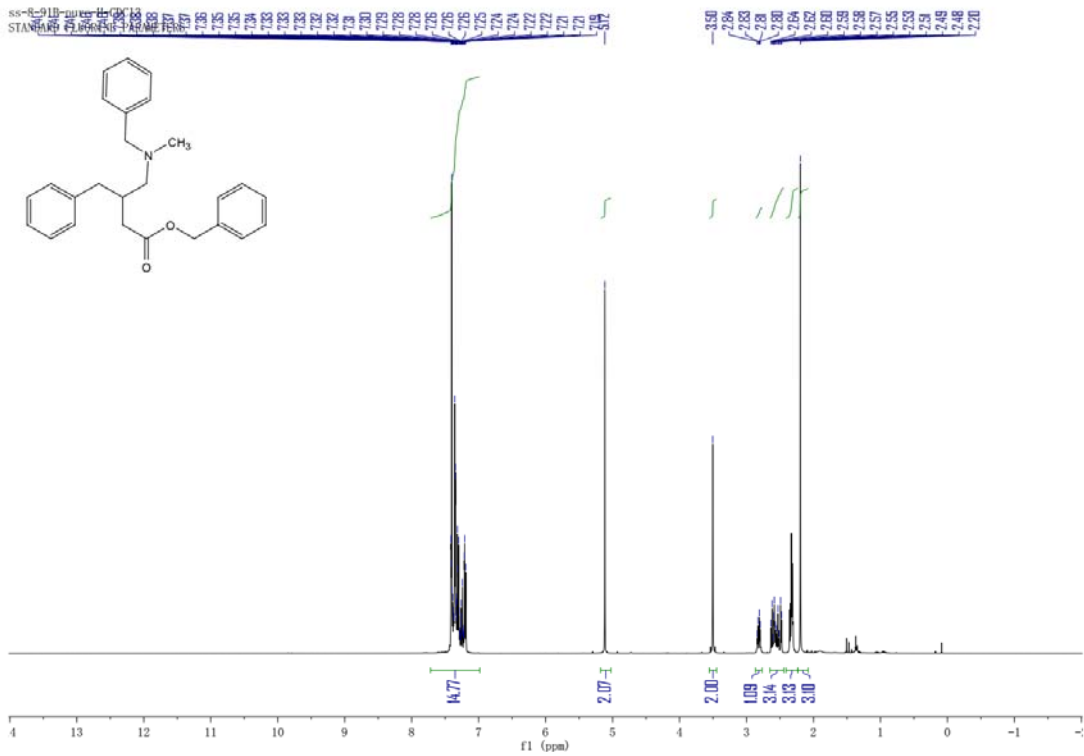



ss-8-91B-pure-C13-CDCl3  
STANDARD FLUORINE PARAMETERS

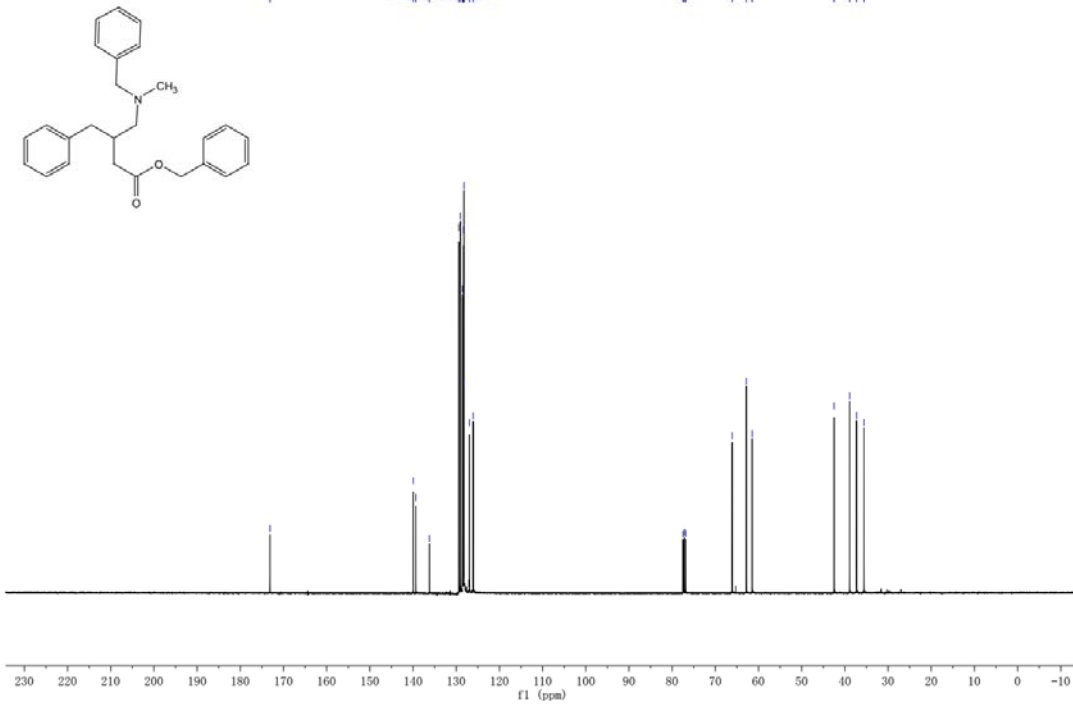

64

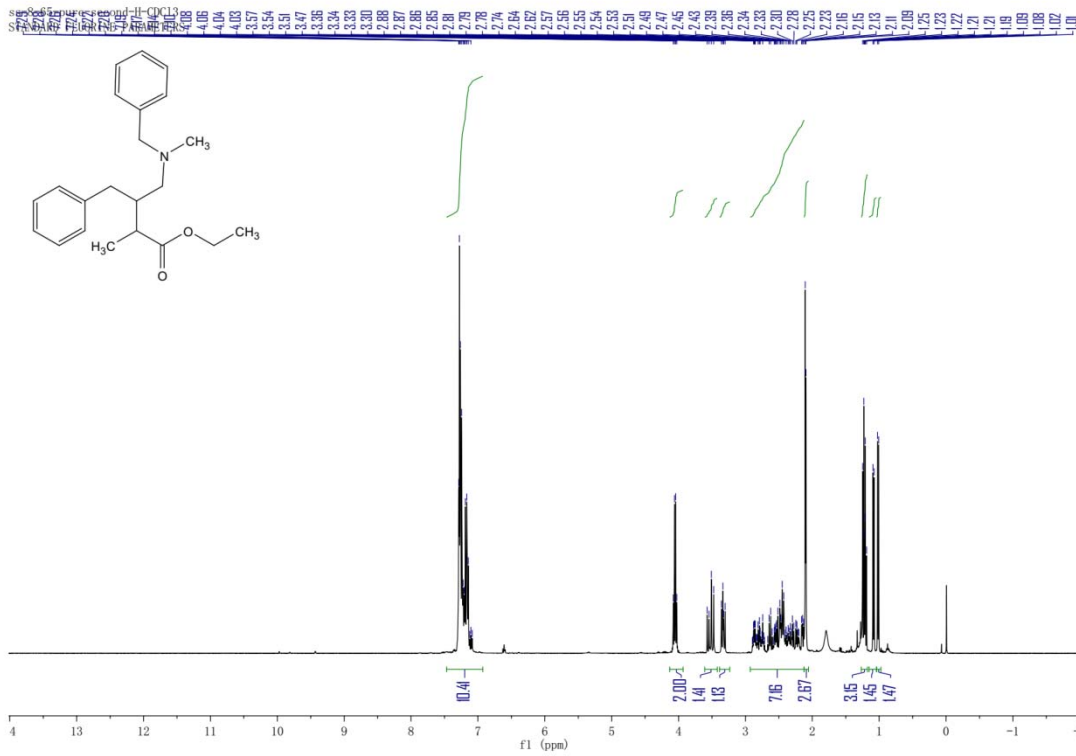

ss-8-65-pure-second-C13-CDCl3

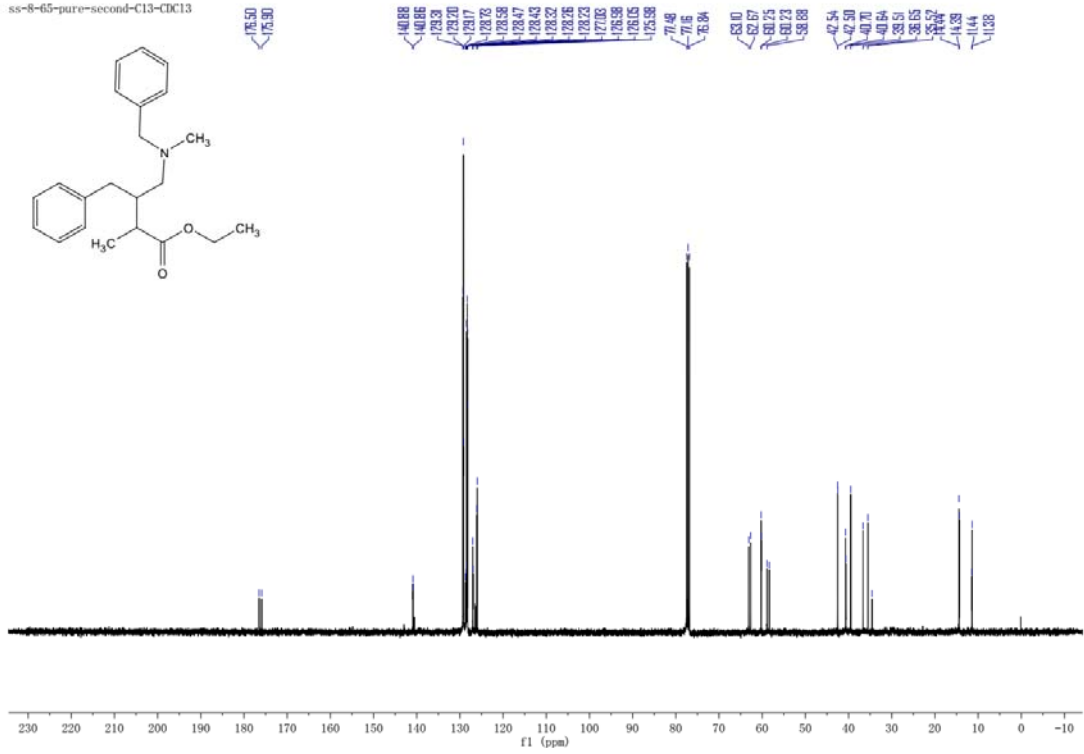

65

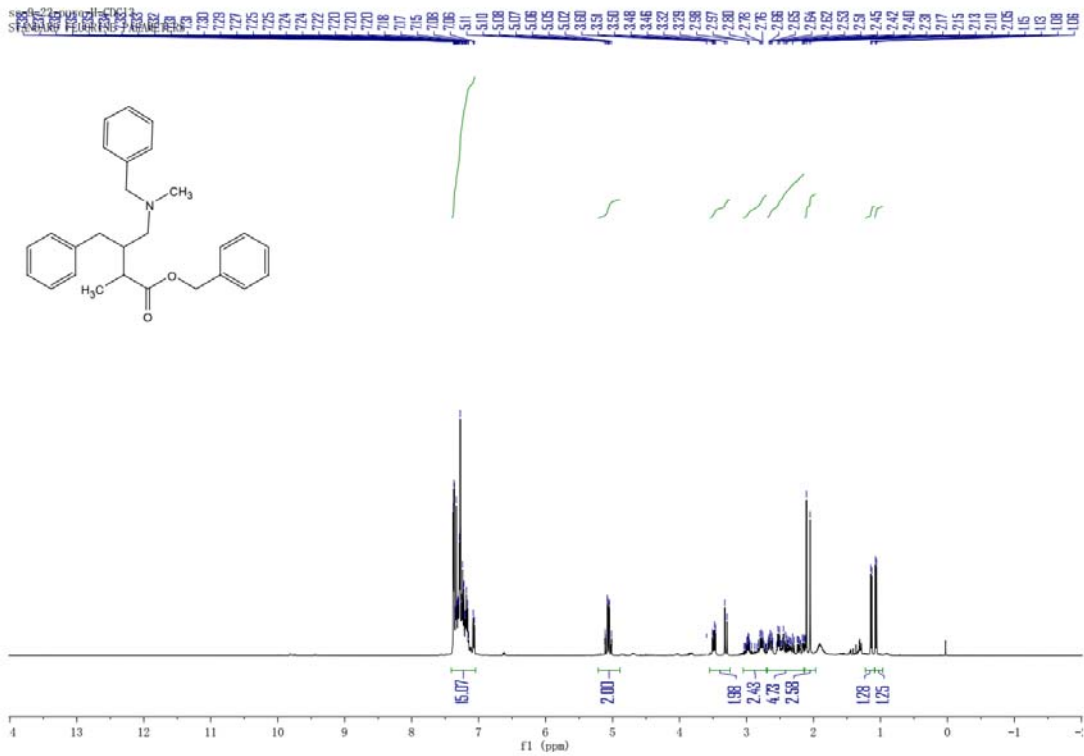

ss-9-22-pure-C13-CDCl3  
STANDARD FLUORINE PARAMETERS

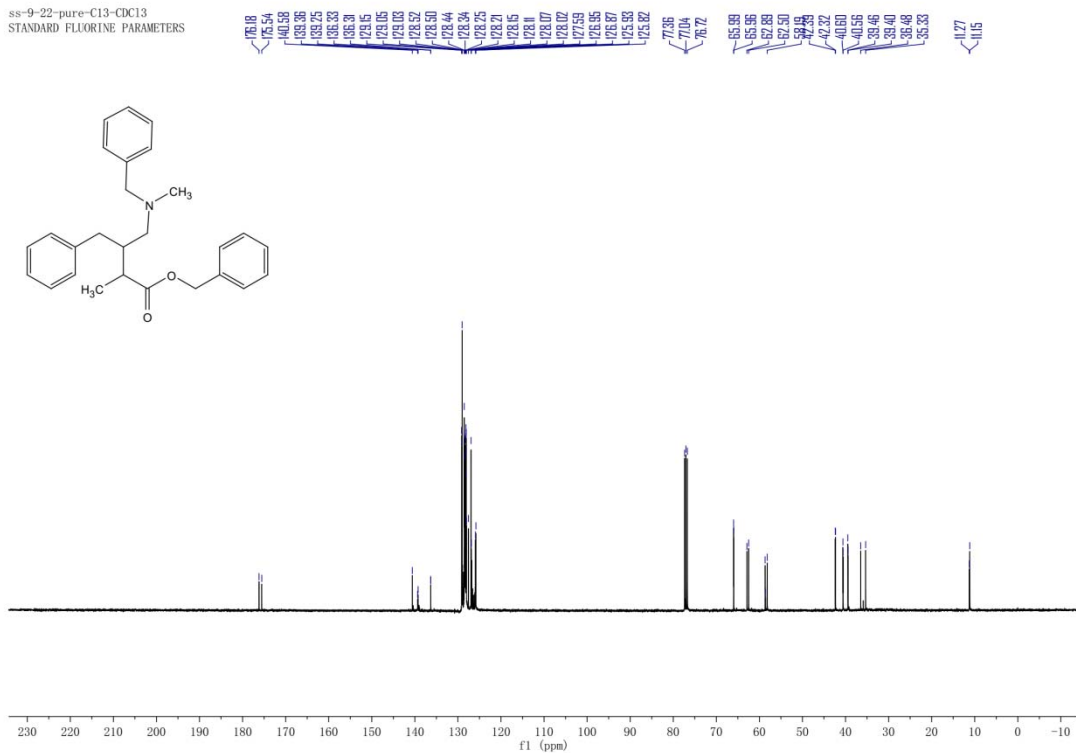

66

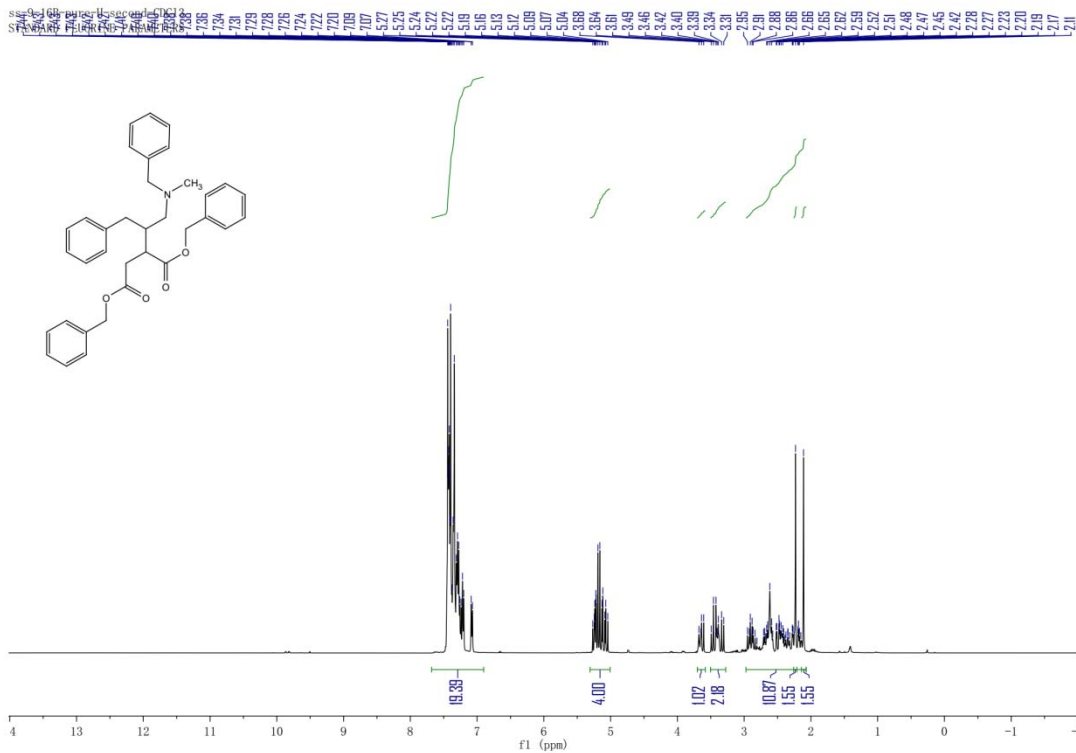



ss-8-63B-H-pure-CDCl3  
STANDARD FLUORINE PARAMETERS

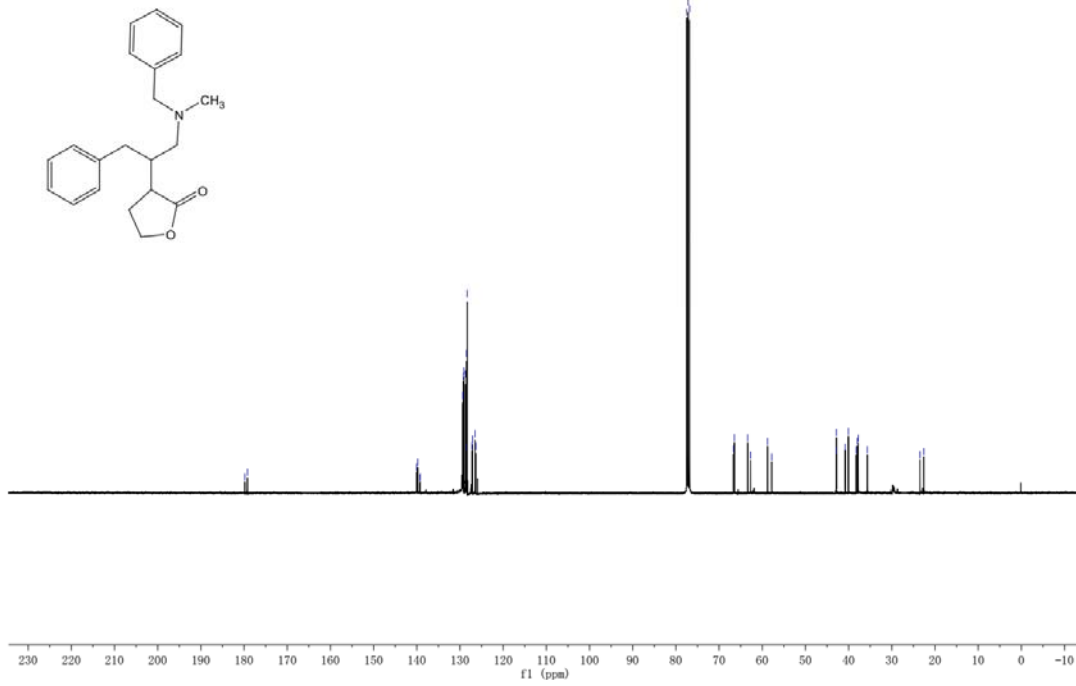

68

ss-8-64B-H-pure-CDCl3  
STANDARD FLUORINE PARAMETERS

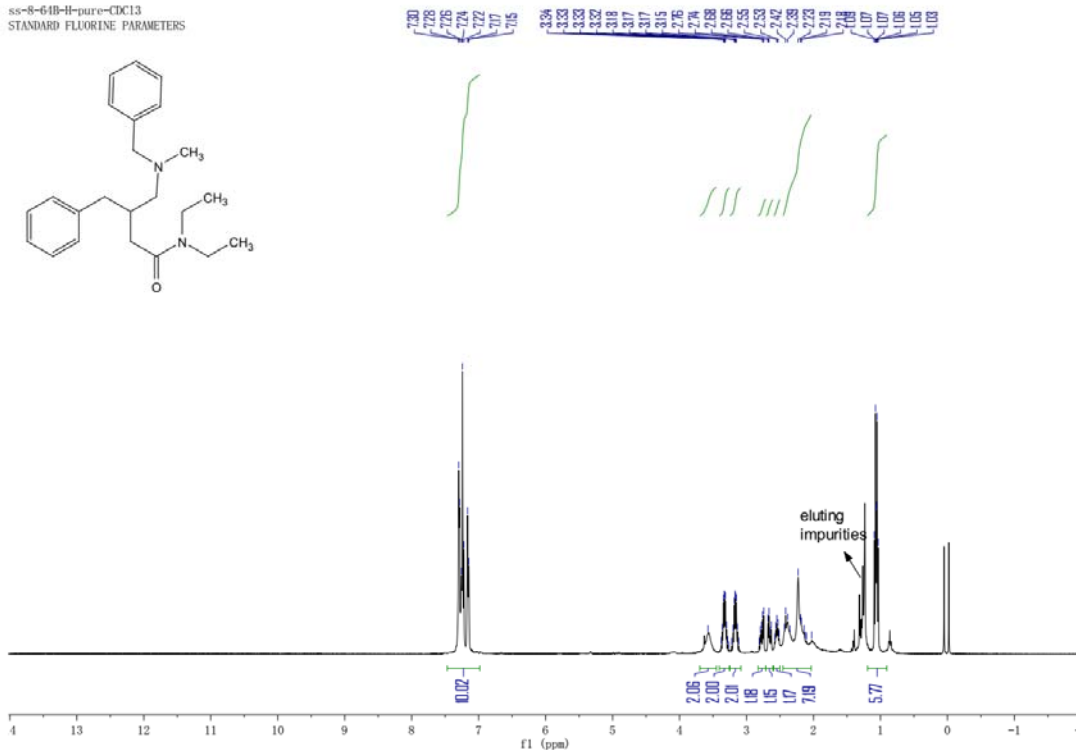

ss-8-64B-C13-pure-CDCl3  
STANDARD FLUORINE PARAMETERS

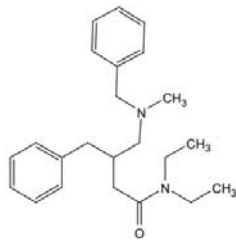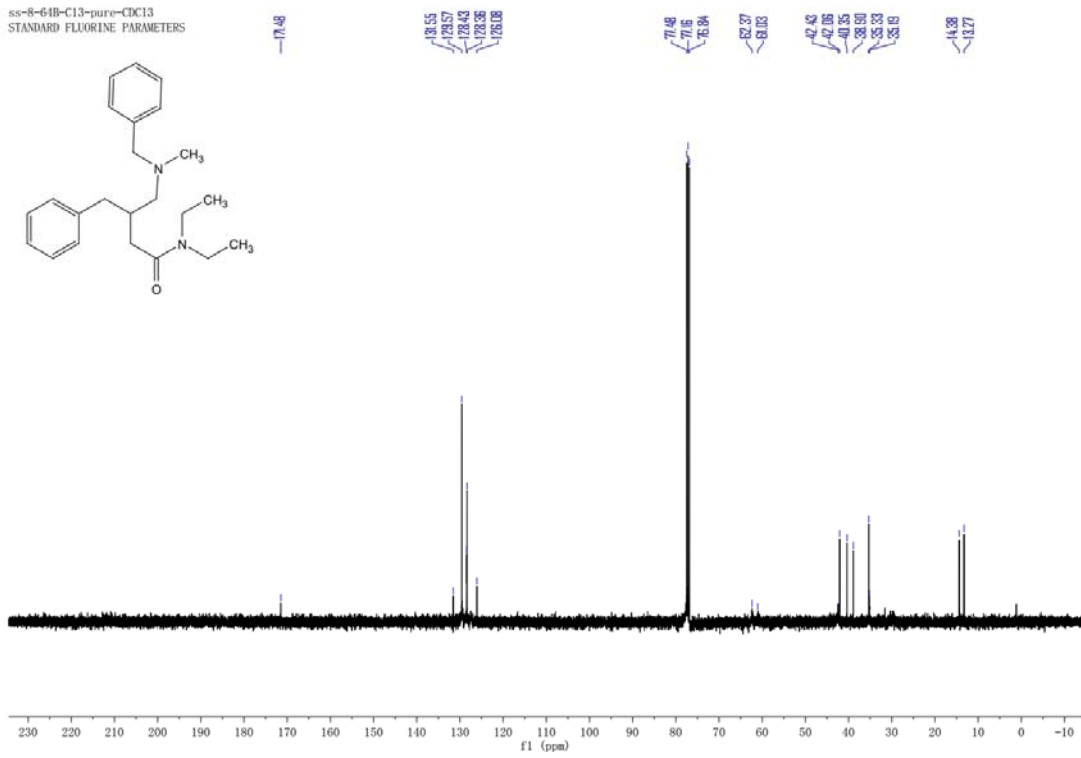

69

ss-8-85B-pure-H-2-CDCl3  
STANDARD FLUORINE PARAMETERS

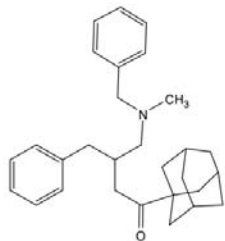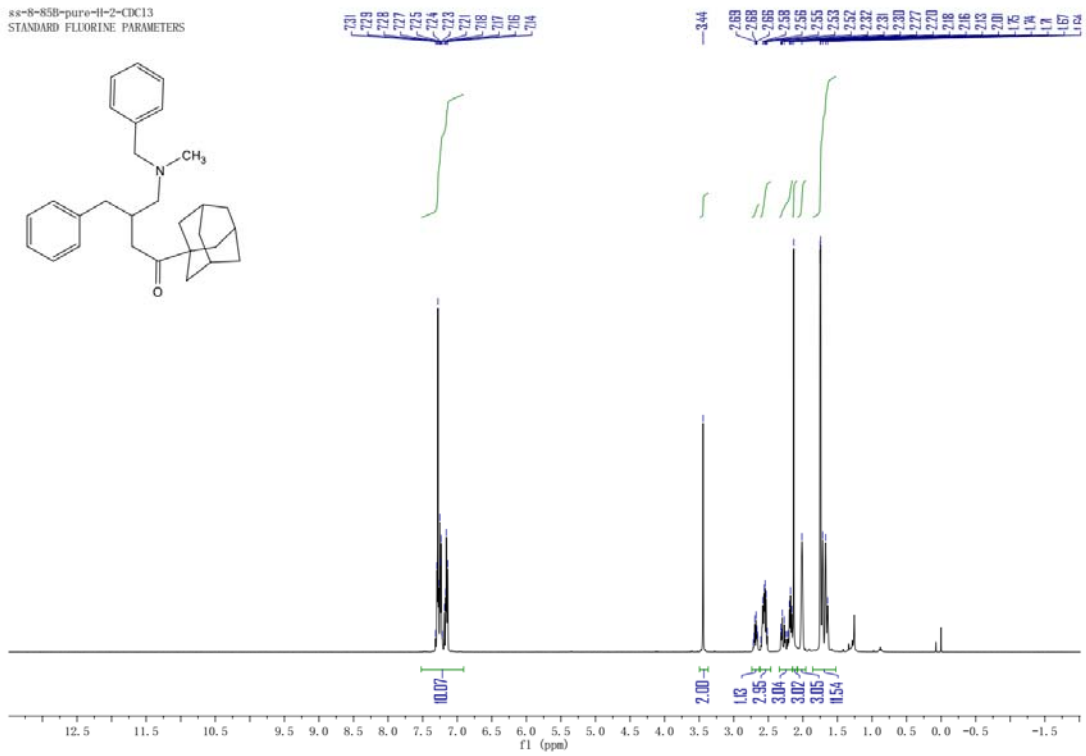

ss-8-85B-pure C13-2-CDC13  
STANDARD FLUORINE PARAMETERS

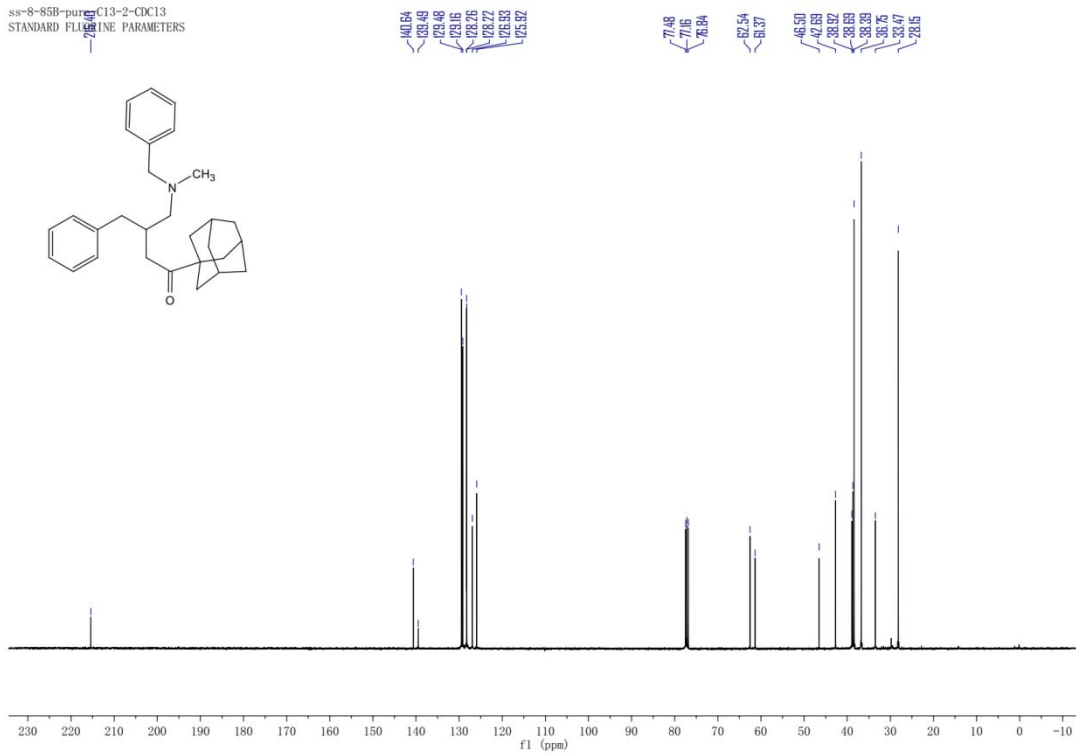

70

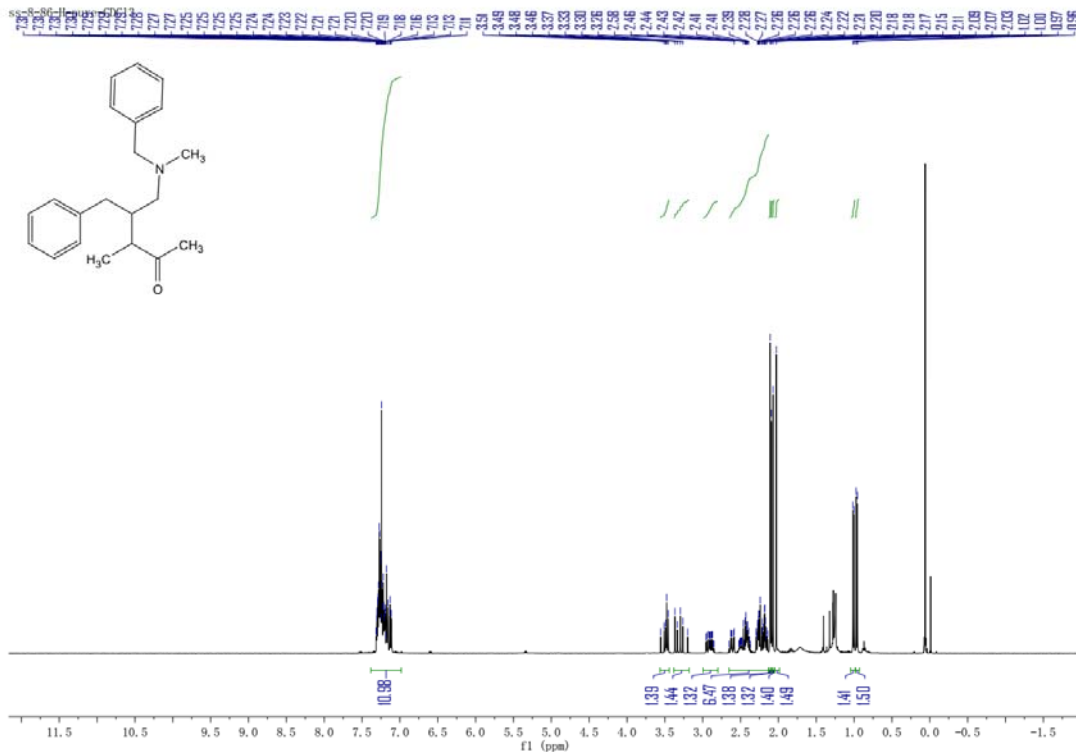

ss-8-86-C13-DC13

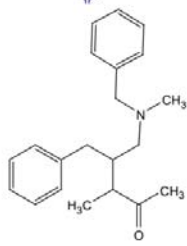

140.93  
140.76  
133.32  
133.16  
129.25  
129.20  
129.14  
128.58  
128.42  
127.08  
127.04  
126.17  
125.89  
77.16  
76.84  
62.98  
62.89  
58.40  
48.08  
47.12  
42.60  
40.77  
39.90  
36.97  
35.18  
23.89  
10.07

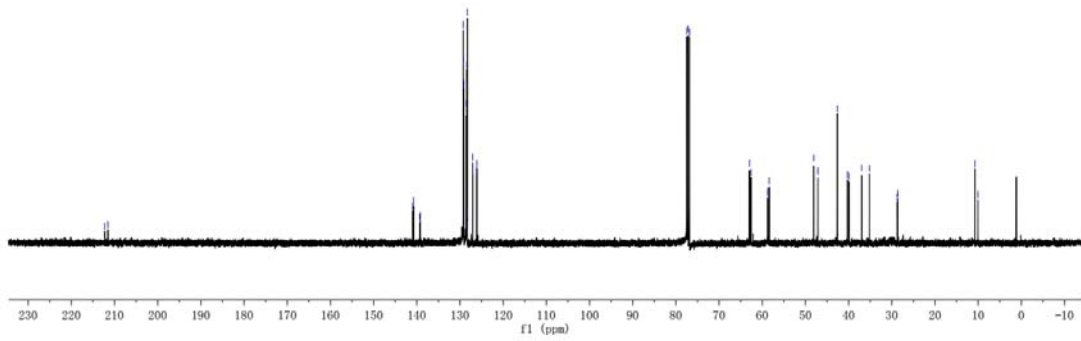

71

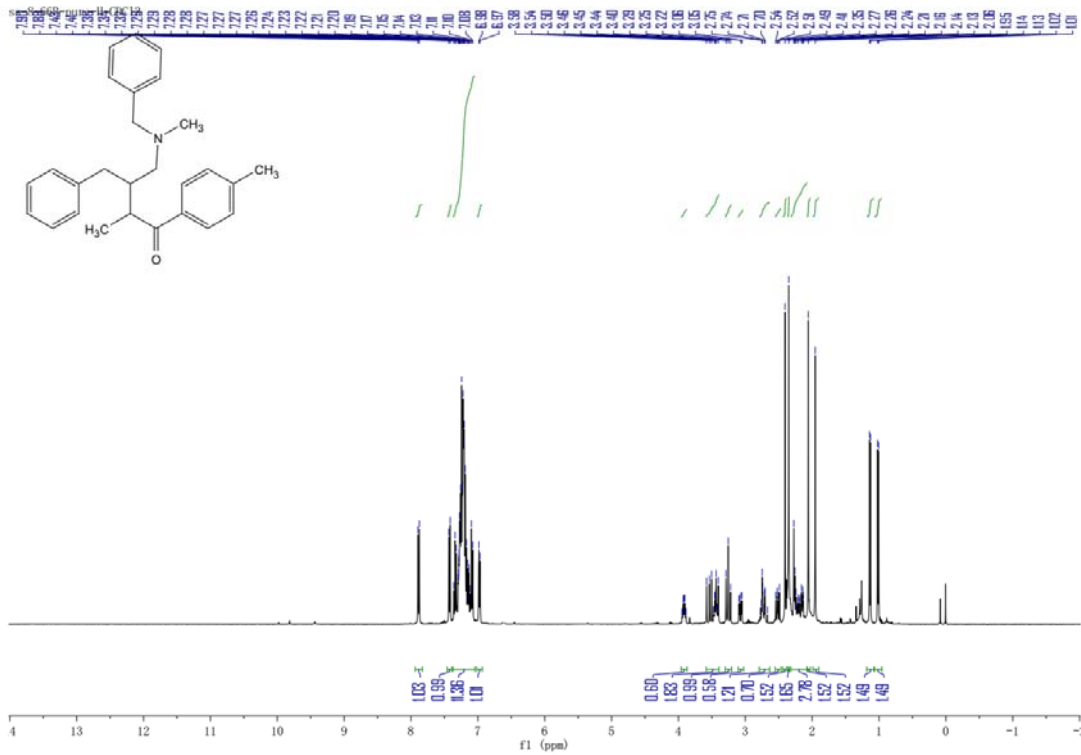





ss-9-14-pure-C13-CDCl3  
STANDARD FLUORINE PARAMETERS

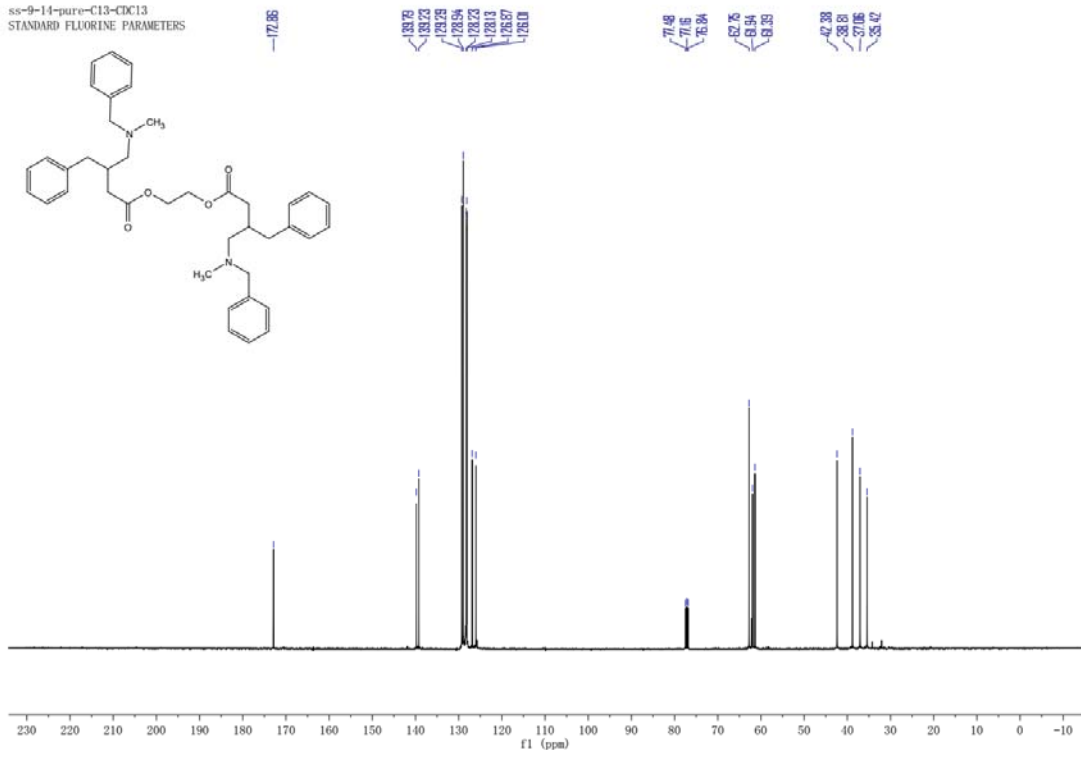

73

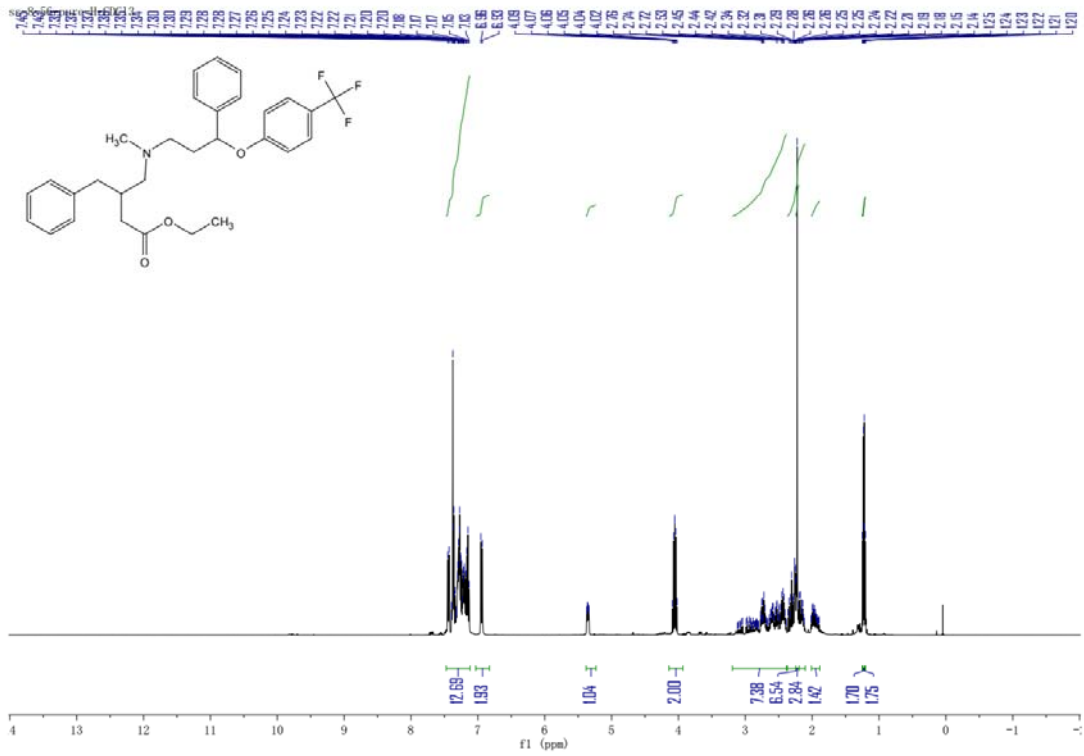

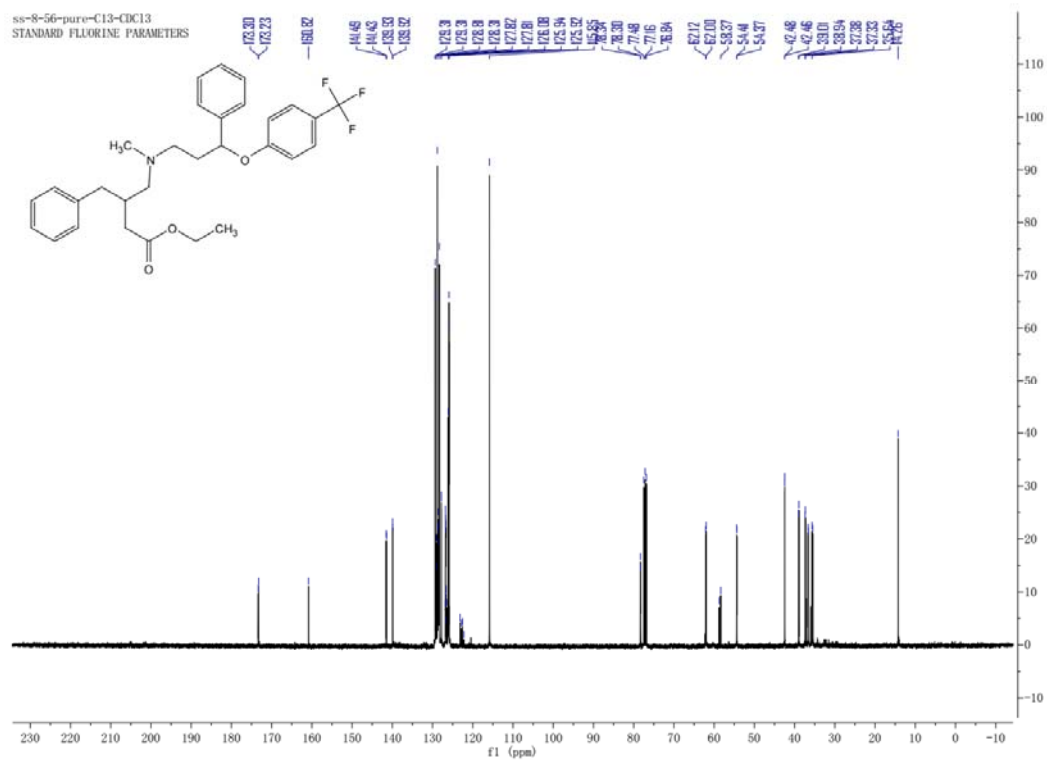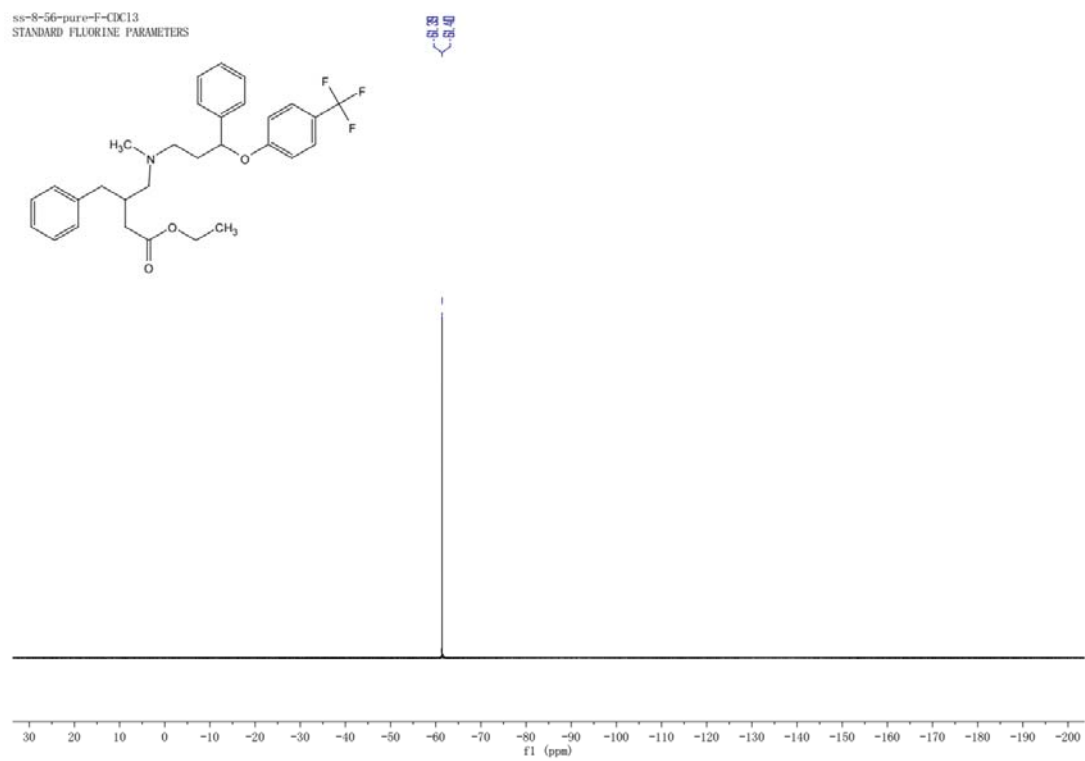



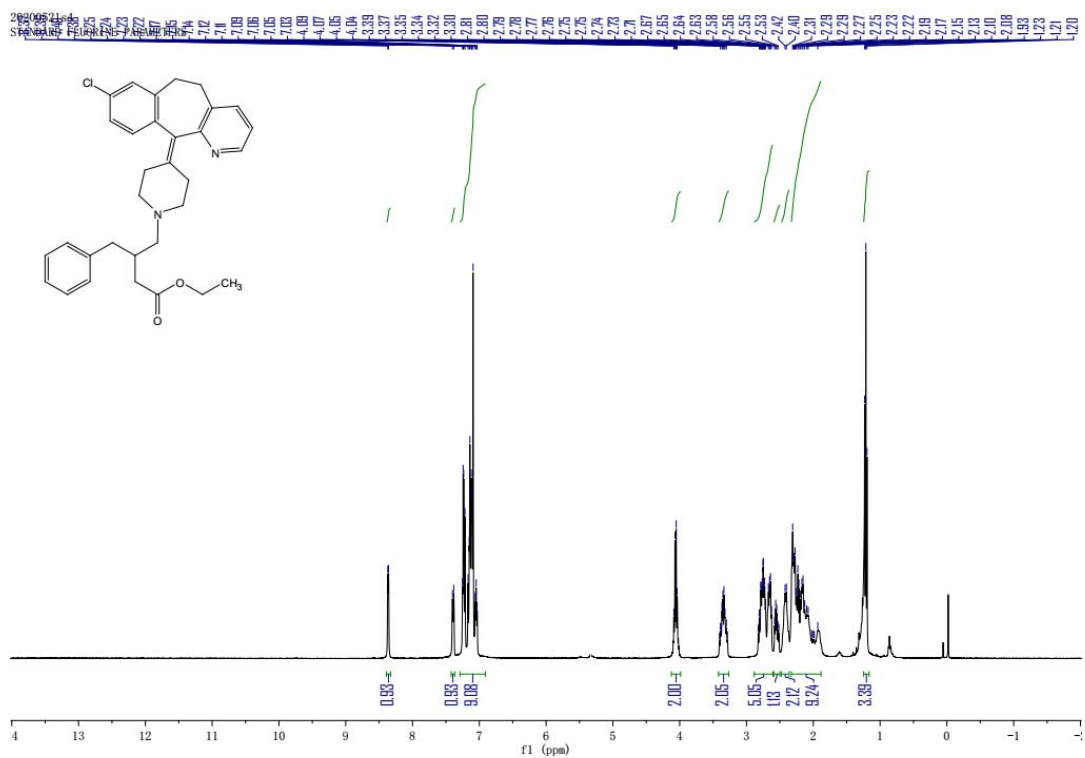

ss-4-C13-CDCl3  
STANDARD FLUORINE PARAMETERS

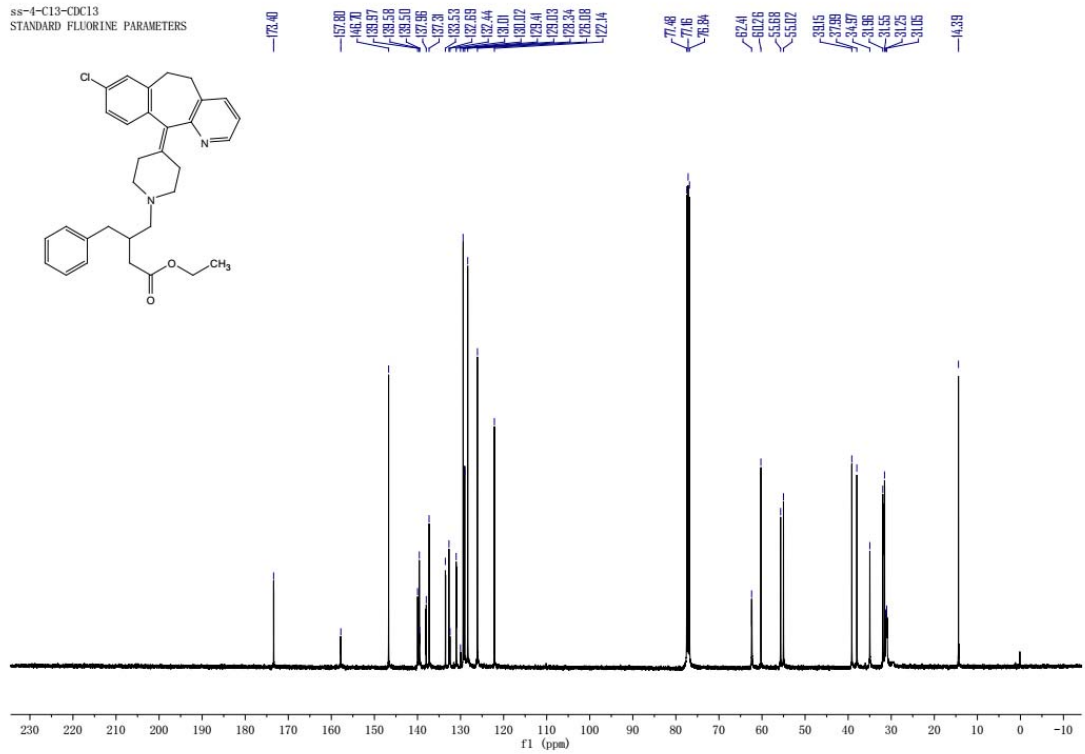

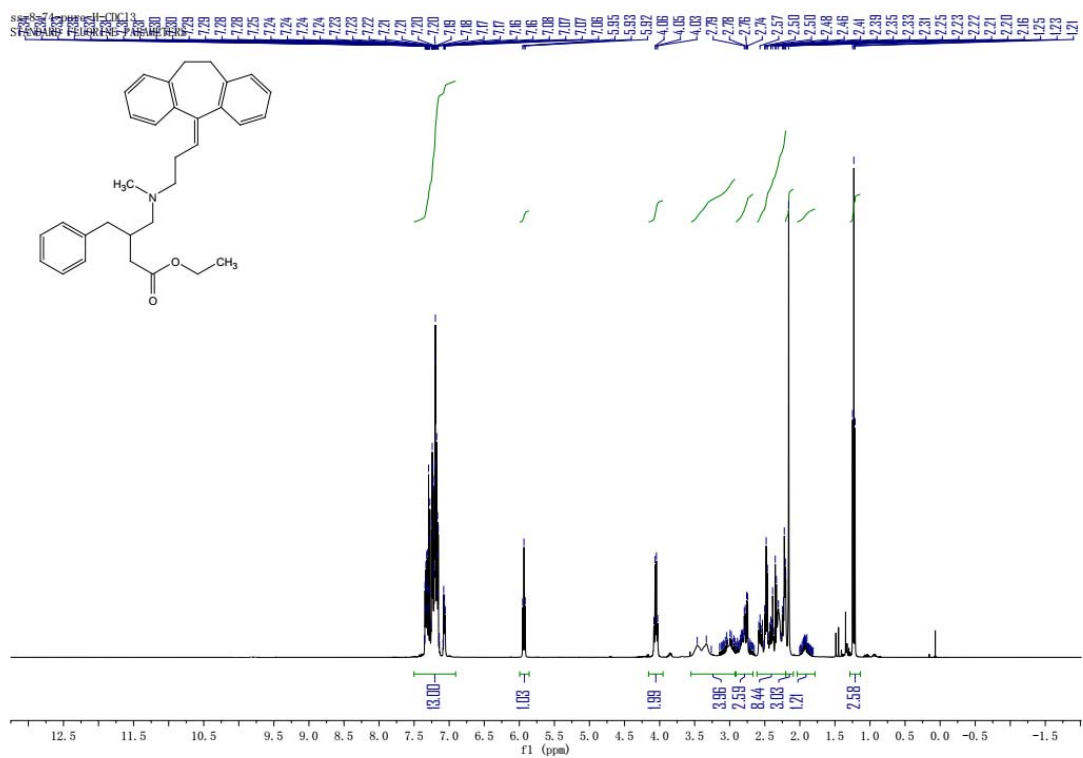

ss-8-74-pure-C13-CDCl3  
STANDARD FLUORINE PARAMETERS

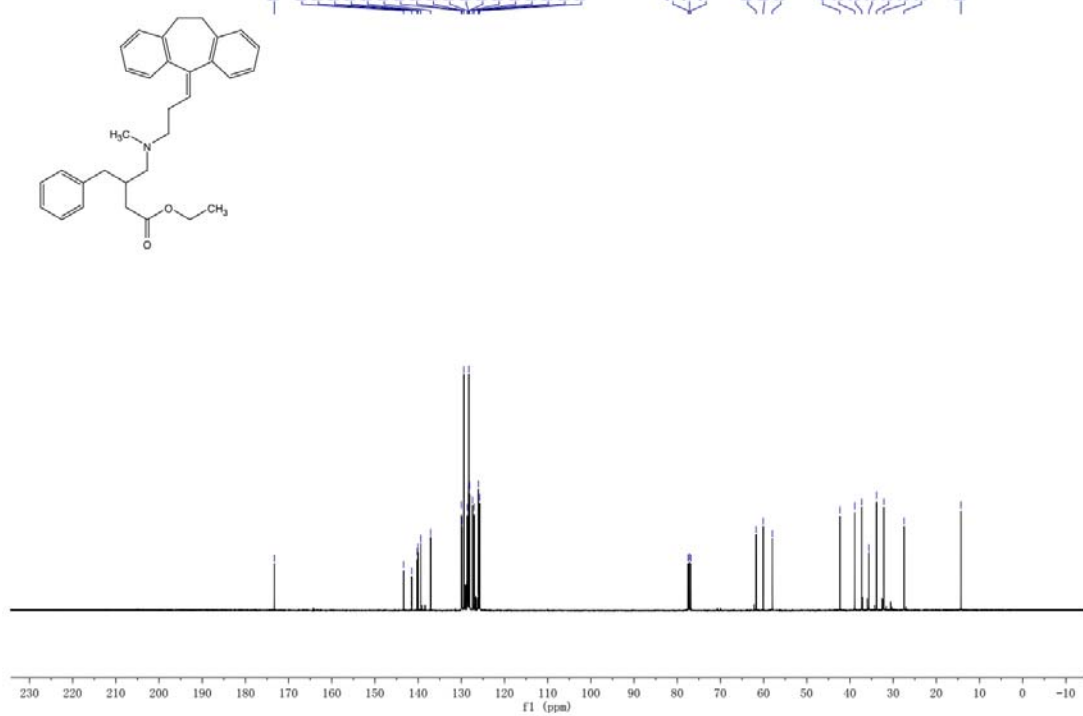

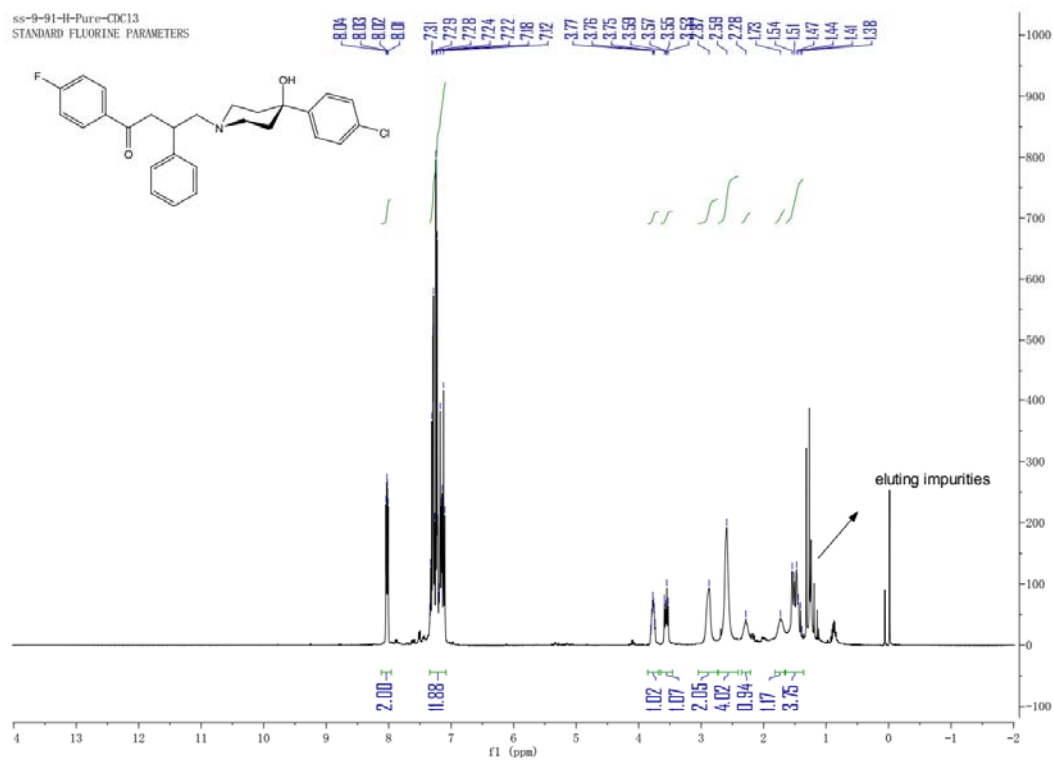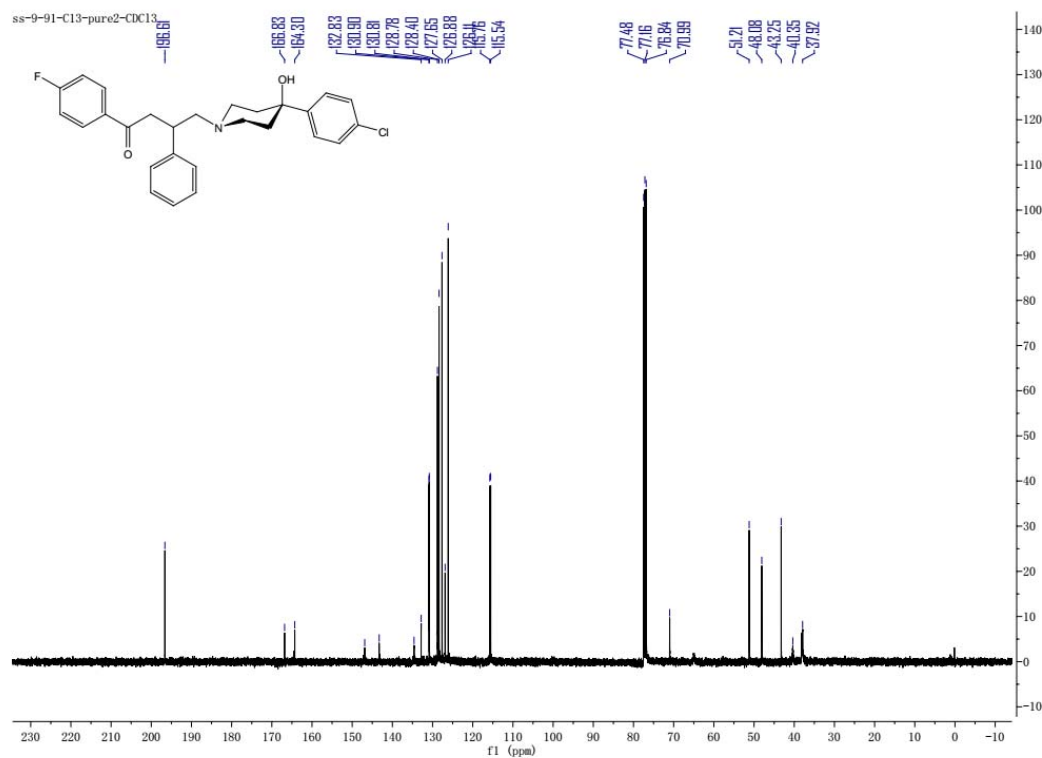

ss-9-91-F-Pure-CDCl3  
STANDARD FLUORINE PARAMETERS

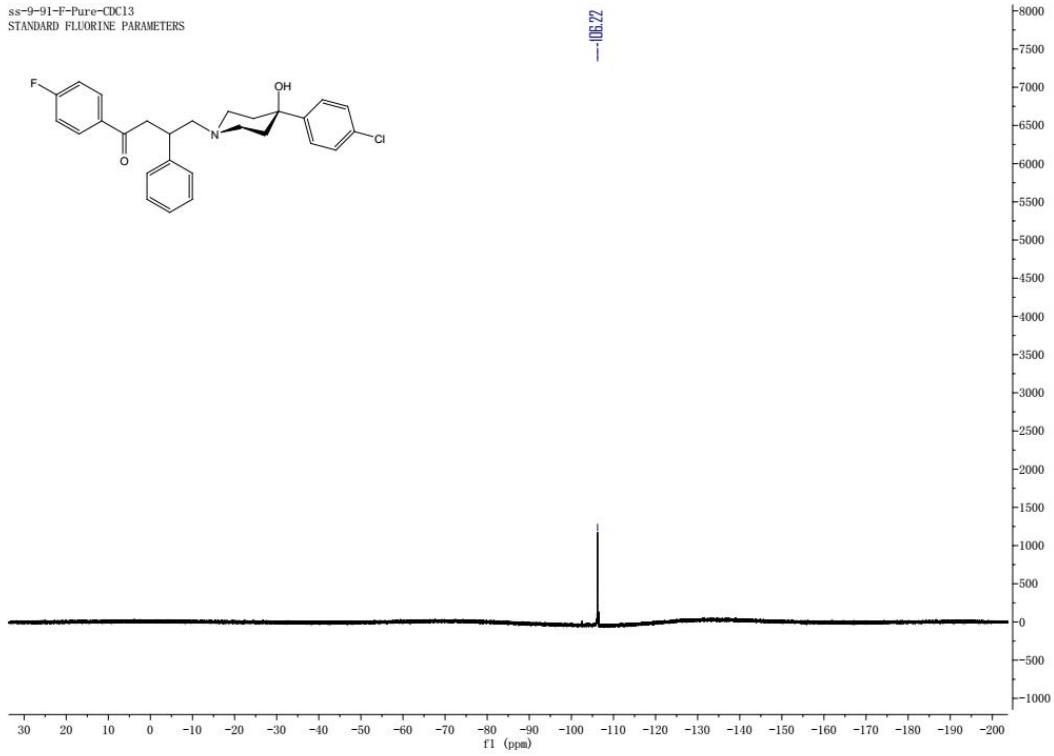

79

ss-9-25substrate-H-in-CDCl3-D20  
STANDARD FLUORINE PARAMETERS

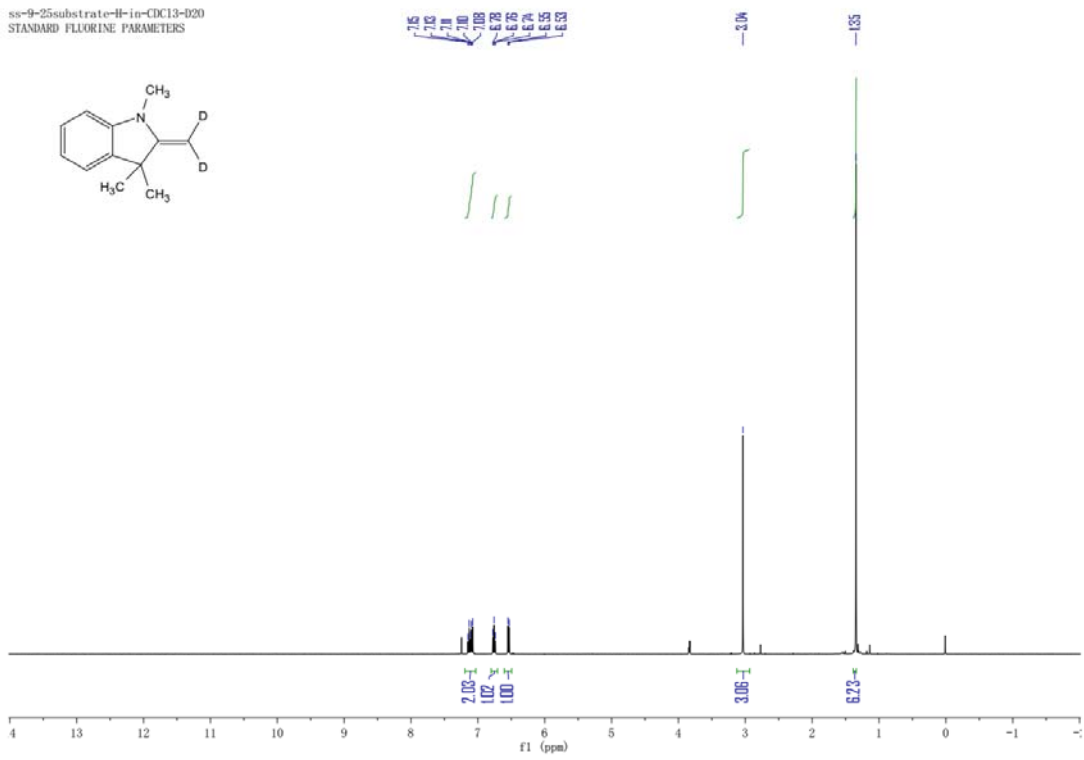



ss-9-25substrate-C13-in-CDCl3-D2O  
STANDARD FLUORINE PARAMETERS

157.9  
146.96  
137.7  
127.65  
127.87  
118.45  
105.0  
77.85  
77.16  
76.84  
76.49  
76.15  
75.83  
44.8  
30.05  
28.87

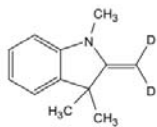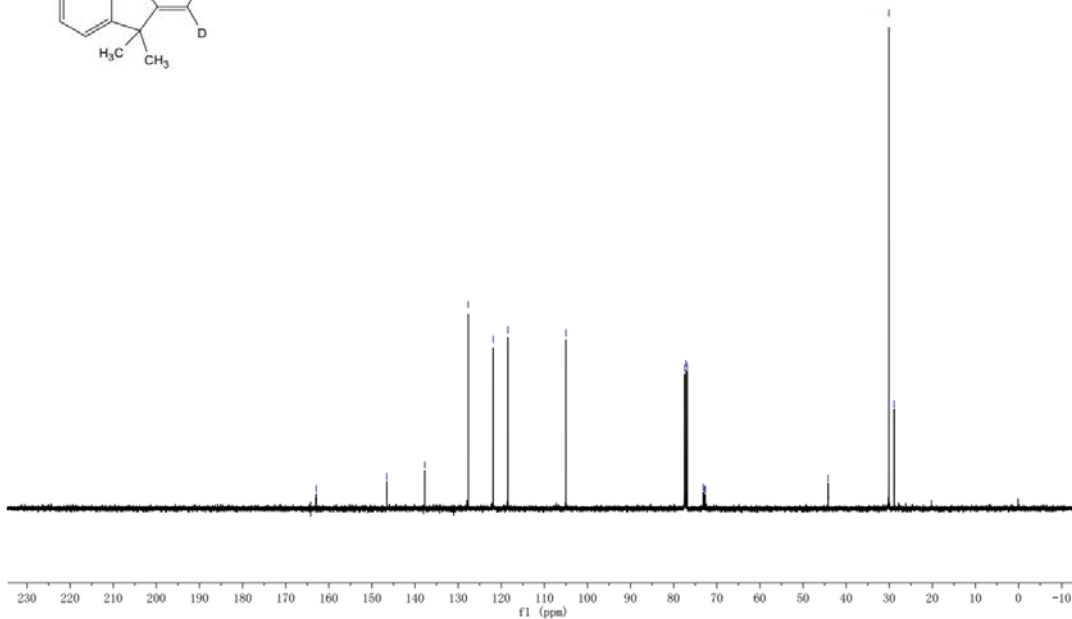

80a

ss-7-39-H-pure-CDCl3

7.288  
7.287  
7.288  
7.285  
7.277  
7.260  
7.258  
7.258  
7.255  
7.254  
7.252  
7.251  
7.250  
7.249  
7.247  
7.246  
7.245  
7.243  
7.241  
7.239  
7.238  
7.237  
7.217  
7.216  
7.215  
7.214  
7.213  
7.212  
7.212  
7.210  
7.204  
7.204  
7.202  
7.201  
7.200  
4.199  
4.198  
1.97  
1.98  
1.98  
1.98  
1.98  
1.16

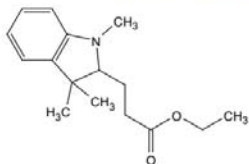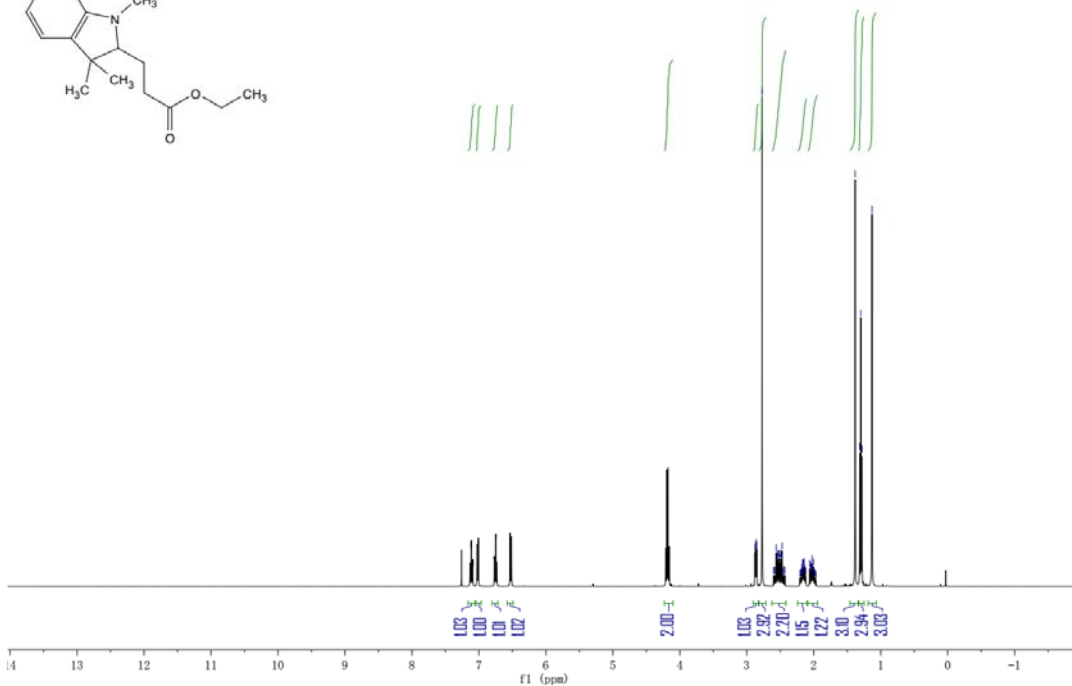

ss-7-39-C13-pure-CDCl3

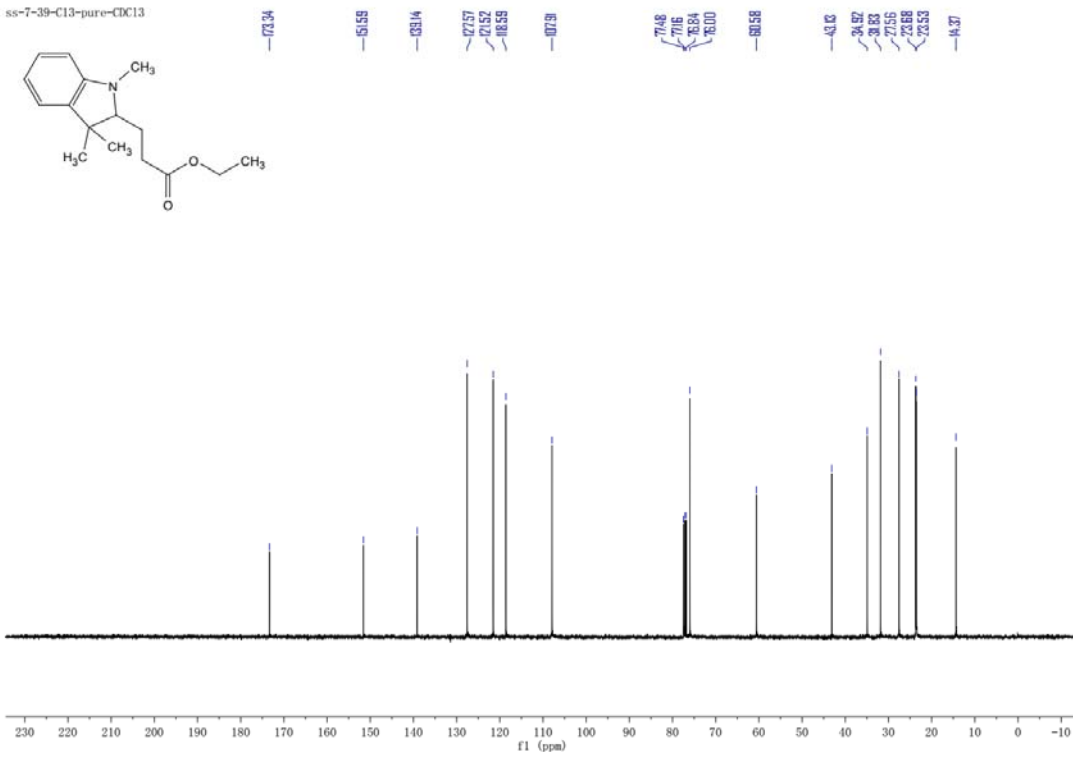

80

ss-9-25-pure-H-CDCl3

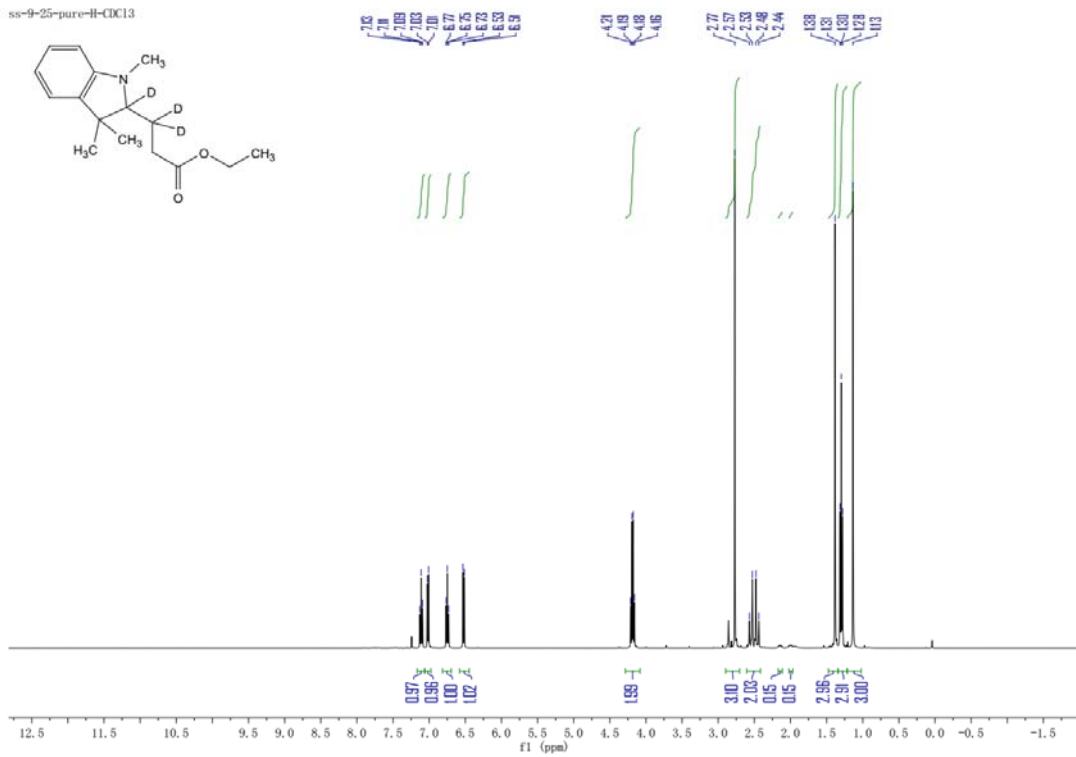

ss-9-25-pure-C13-CDCl3

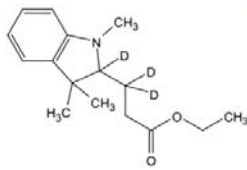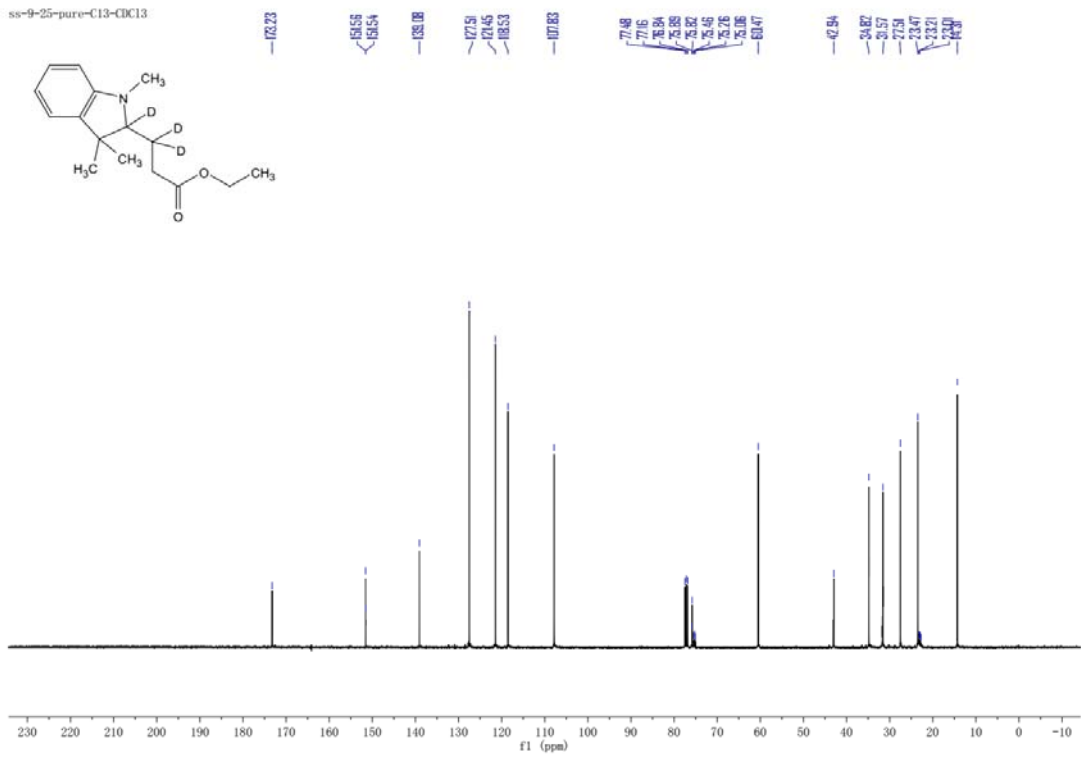

**a**

ss-8-85-3-H-CDCl3

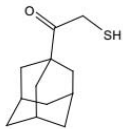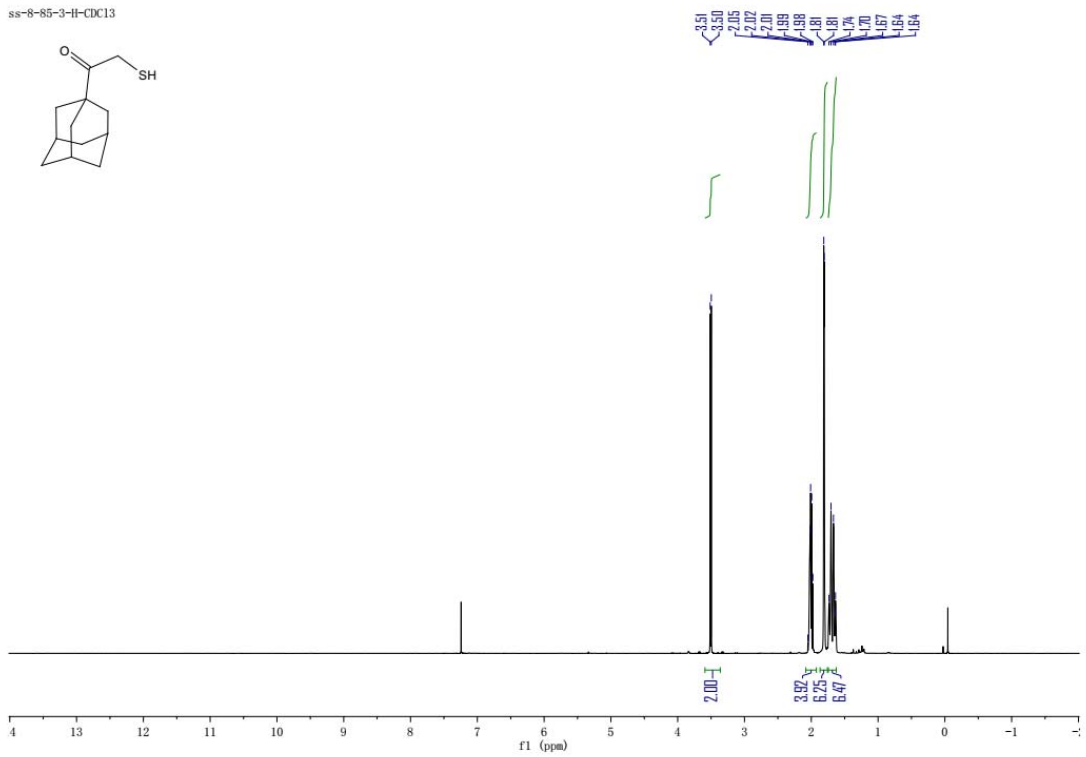



ss-8-63-3-C13-CDCl3  
STANDARD FLUORINE PARAMETERS

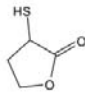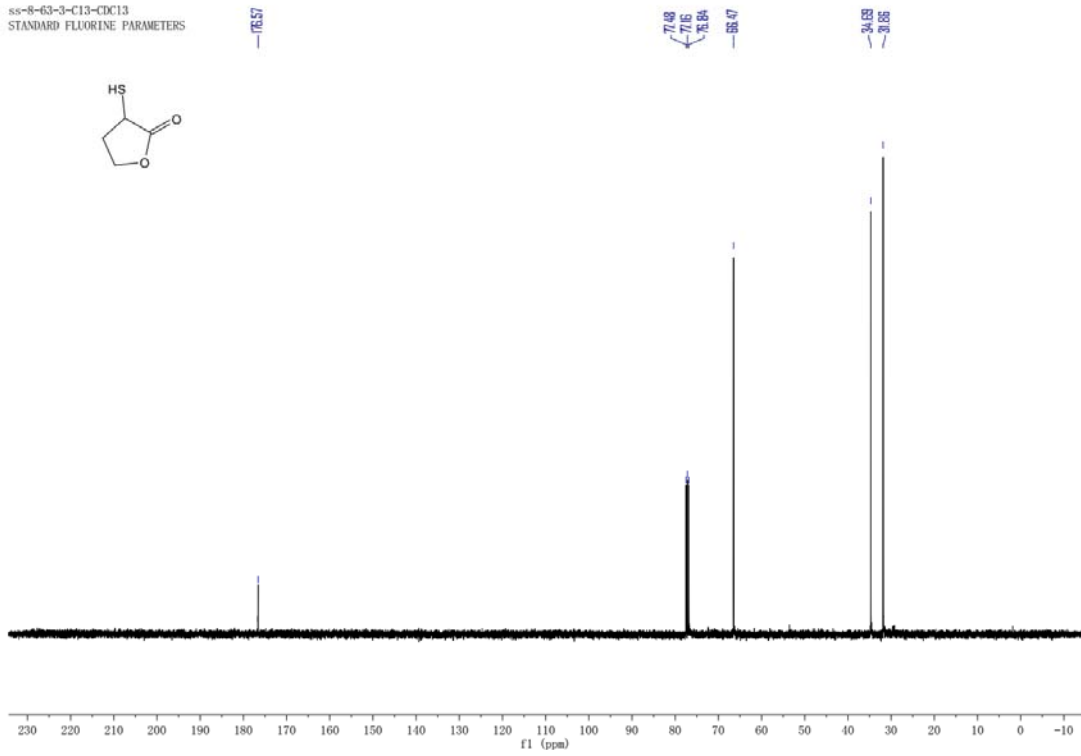

**c**

ss-8-64-3-H  
DEUTERIUM OBSERVE  
STANDARD PARAMETERS

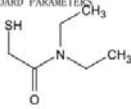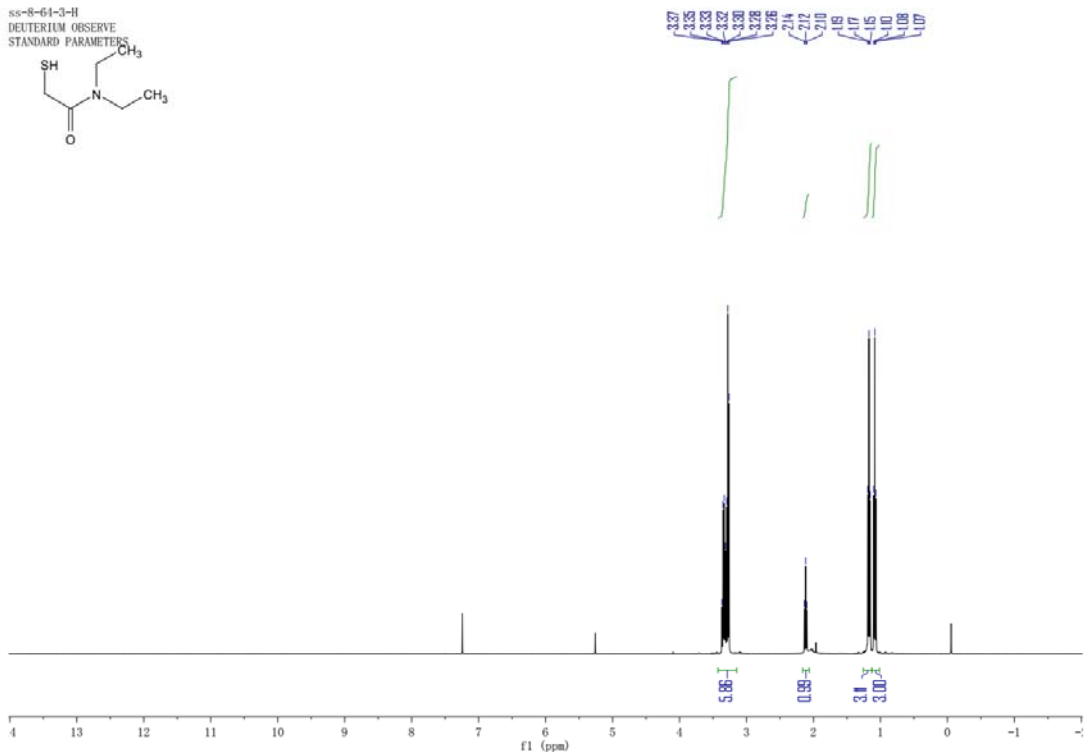

ss-8-64-3-C  
 DEUTERIUM OBSERVE  
 STANDARD PARAMETERS

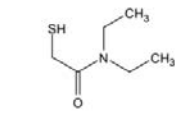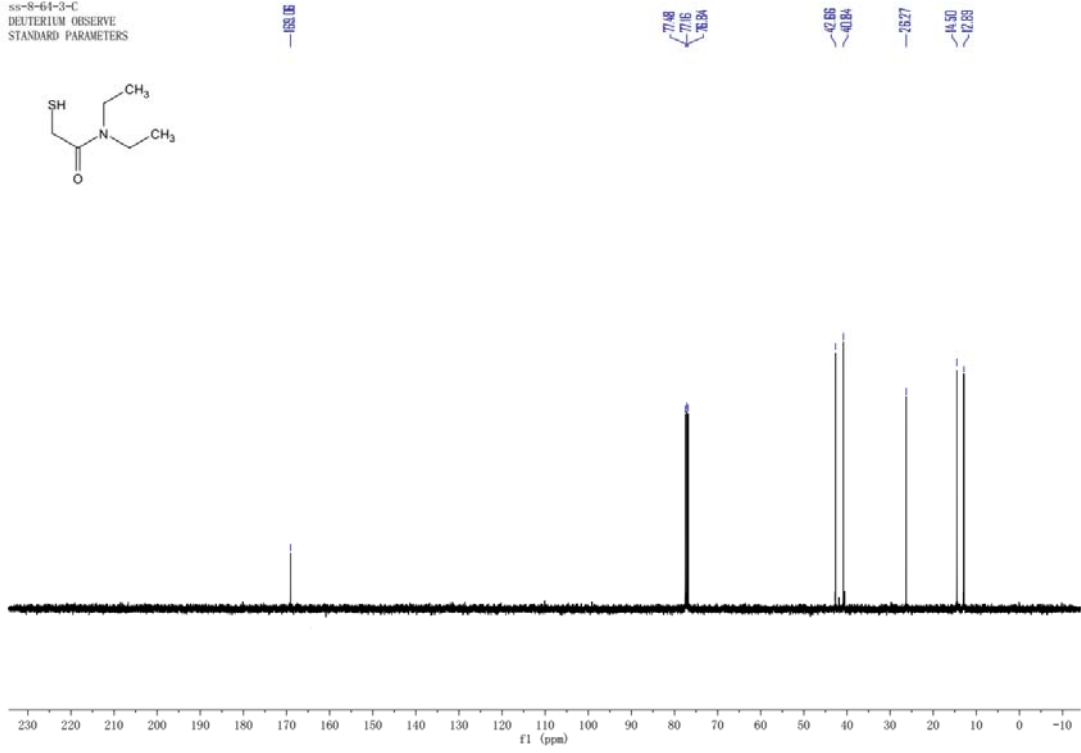

**d**

ss-8-66-3-II-pure-CDCl3

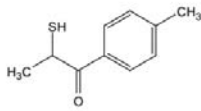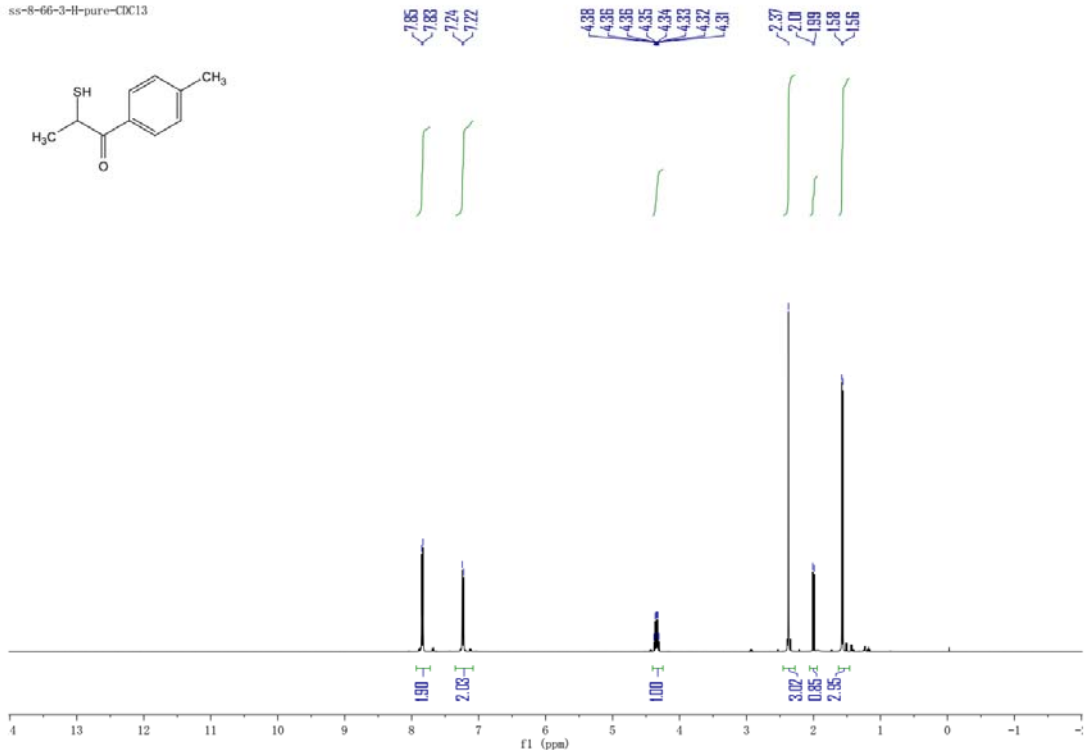

ss-8-66-3-C13-pure-CDCl3

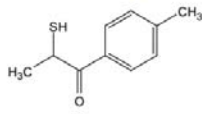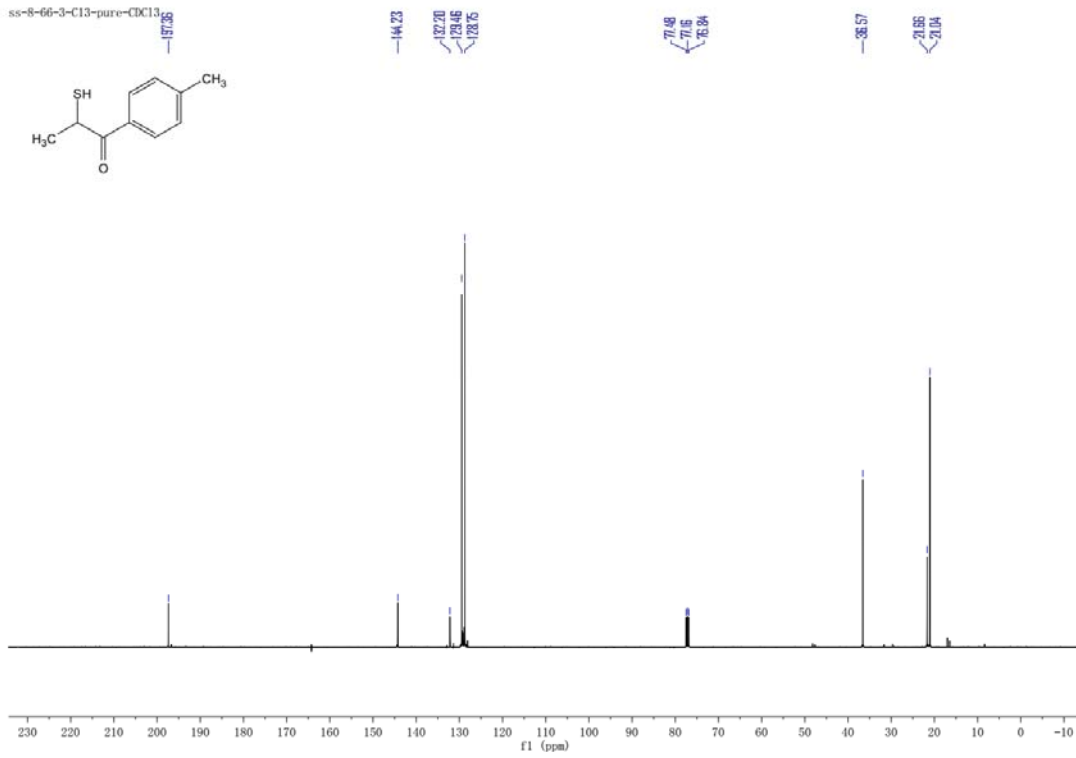

e

ss-8-82-substrate-pure-H-CDCl3  
STANDARD FLUORINE PARAMETERS

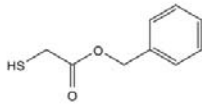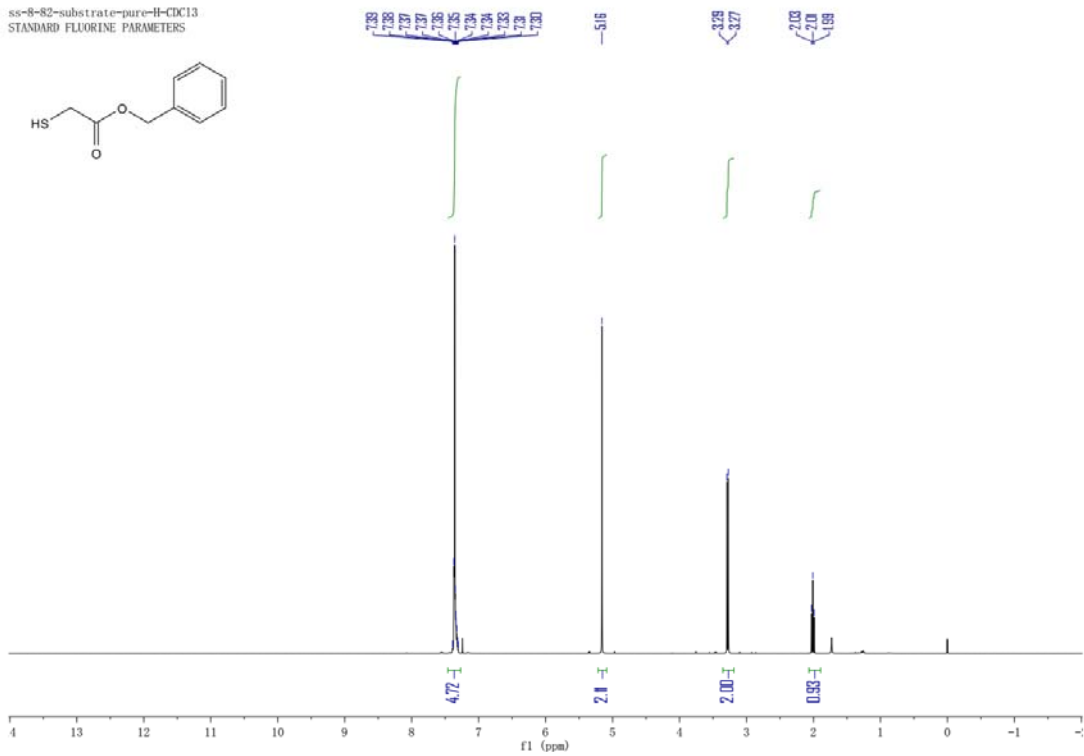

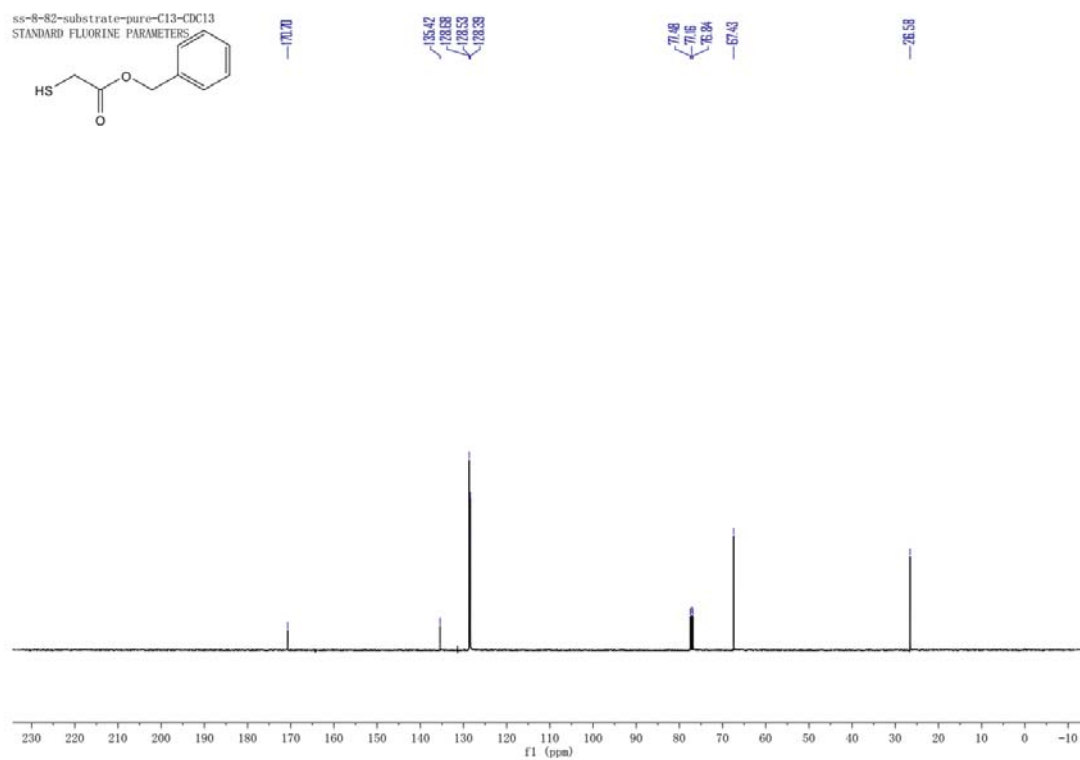

f

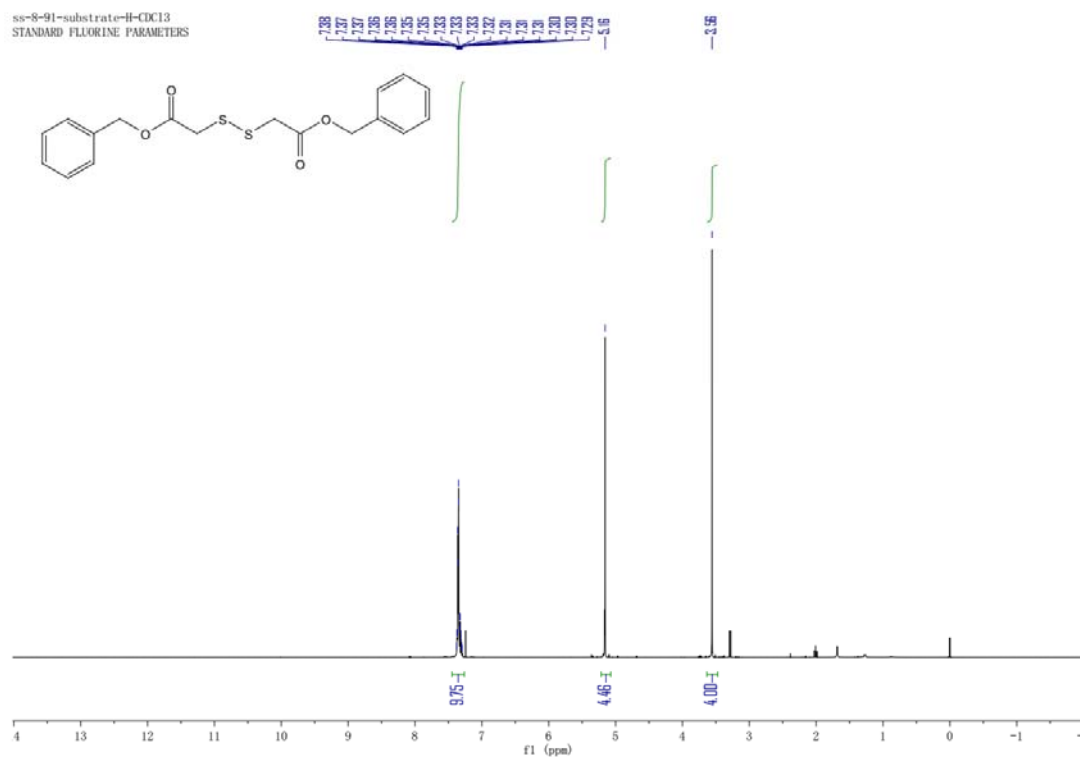



ss-8-91-substrate-C13-CDCl3  
STANDARD FLUORINE PARAMETERS

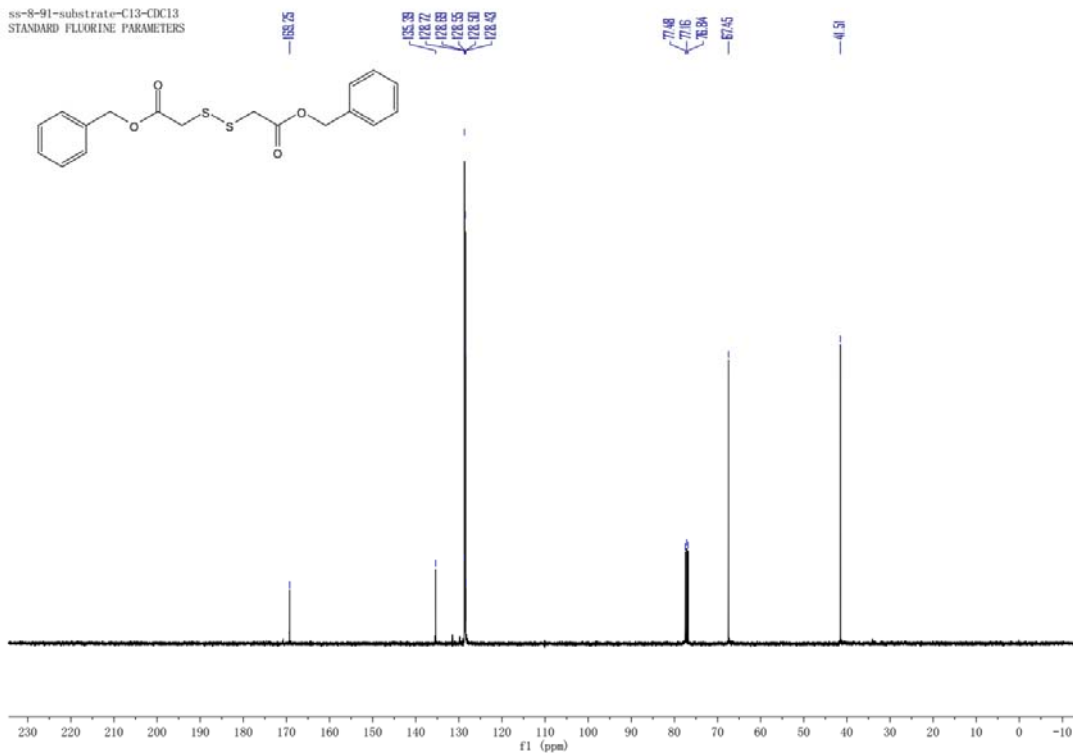

**h**

ss-9-16-1-pure-II-CDCl3

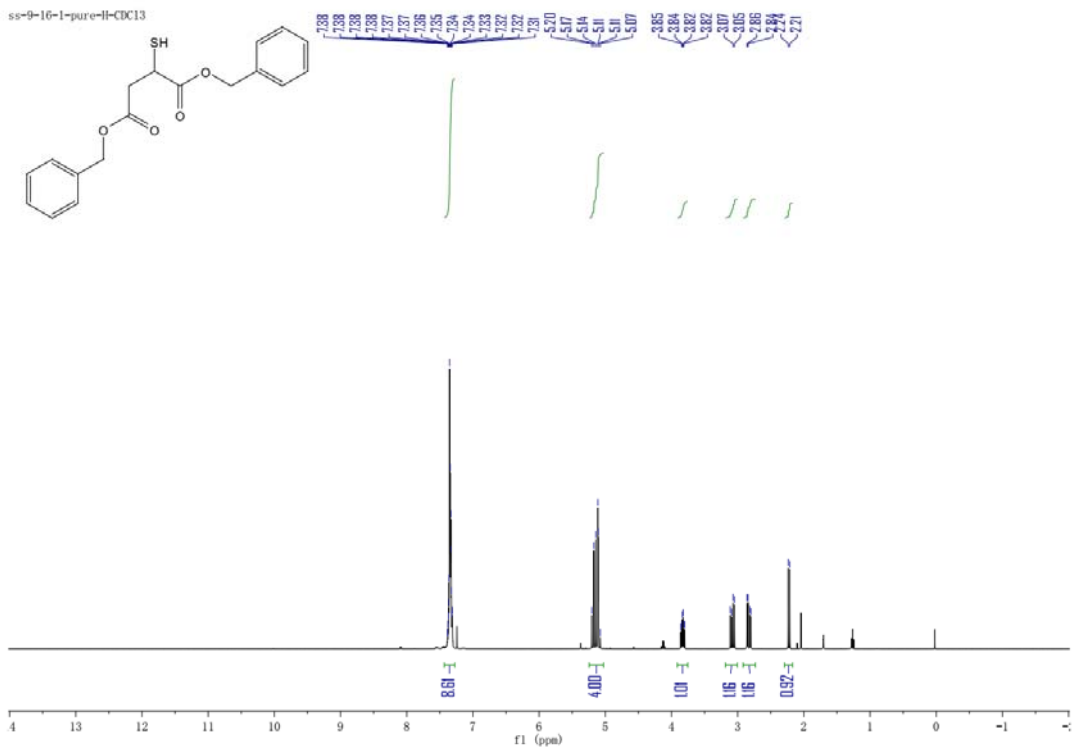

ss-9-16-1-pure-C13-CDCl3

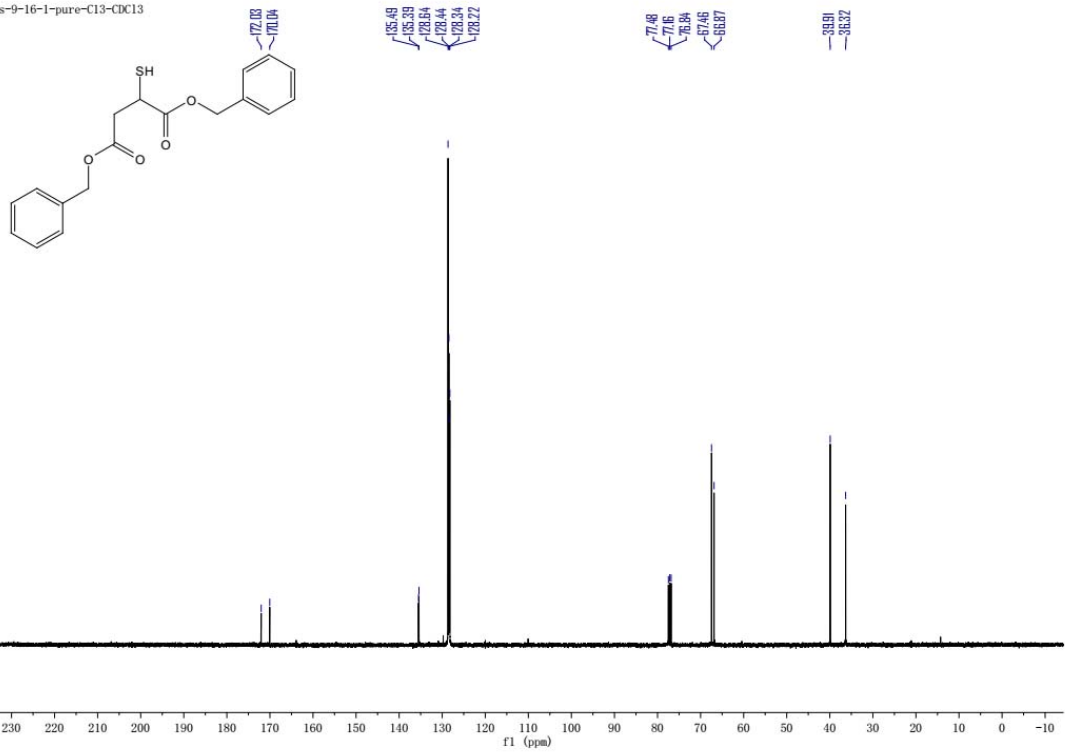

## 9. Supplementary References

1. Still, W. C., Kahn, M. & Mitra, A. Rapid chromatographic technique for preparative separations with moderate resolution. *J. Org. Chem.* **43**, 2923-2925 (1978).
2. Lopp, J. M. & Schmidt, V. A. Intermolecular Phosphite-Mediated Radical Desulfurative Alkene Alkylation Using Thiols. *Org. Lett.* **21**, 8031-8036 (2019).
3. Benati, L., Leardini, R., Minozzi, M., Nanni, D., Scialpi, R., Spagnolo, P., Strazzari, S. & Zanardi, G. A Novel Tin - Free Procedure for Alkyl Radical Reactions. *Angew. Chem. Int. Ed.* **43**, 3598-3601 (2004).
4. Dardonville, C., Rinaldi, E., Barrett, M. P., Brun, R., Gilbert, I. H. & Hanau, S. Selective inhibition of *Trypanosoma brucei* 6-phosphogluconate dehydrogenase by high-energy intermediate and transition-state analogues. *J. Med. Chem.* **47**, 3427-3437 (2004).
5. Zhang, Y.-Z., Zhu, S.-F., Cai, Y., Mao, H.-X. & Zhou, Q.-L. Copper-catalyzed enantioselective carbenoid insertion into S-H bonds. *Chem. Commun.* **36**, 5362-5364 (2009).
